# Supplementary material for: BubR1 controls starvation-induced lipolysis via IMD signaling pathway in Drosophila
Source: publisher site journal article supplement (doi:10.18632/aging.205533), 2024-02-08
Supplement: Supplementary file [file aging-v16i4-205533-supplementary-material-SD2.pdf]

**SUPPLEMENTARY TABLE**

**Supplementary Table 1. Full *Drosophila* genotypes as they appear in each figure panel, related to Figures 1–4 and Supplementary Figures 1–4.**

|                               |                                                                                                                                                            |
|-------------------------------|------------------------------------------------------------------------------------------------------------------------------------------------------------|
| <b>Figure 1</b>               |                                                                                                                                                            |
| <b>A</b>                      | <i>w<sup>-</sup>; +/+; +/+</i>                                                                                                                             |
|                               | <i>w<sup>-</sup>; BubRI<sup>MI01546</sup>/BubRI<sup>MI01546</sup>; +/+</i><br><i>w<sup>-</sup>; BubRI<sup>MI01546</sup>/BubRI<sup>MI01546</sup>; +/+</i>   |
| <b>B, C, D, F</b>             | <i>w<sup>-</sup>; +/+; +/+</i>                                                                                                                             |
|                               | <i>w<sup>-</sup>; BubRI<sup>MI01546</sup>/BubRI<sup>k03113</sup>; +/+</i>                                                                                  |
| <b>E</b>                      | <i>w<sup>-</sup>; +/+; +/+</i>                                                                                                                             |
|                               | <i>w<sup>-</sup>; BubRI<sup>MI01546</sup>/BubRI<sup>k03113</sup>; r4-Gal4</i><br><i>UAS-BubRI; BubRI<sup>MI01546</sup>/BubRI<sup>k03113</sup>; r4-Gal4</i> |
| <b>Figure 2</b>               |                                                                                                                                                            |
| <b>A</b>                      | <i>w<sup>-</sup>; +/+; +/+</i>                                                                                                                             |
|                               | <i>w<sup>-</sup>; CG-Gal4; +/+</i>                                                                                                                         |
| <b>B, C, D, E, F</b>          | <i>+/+; CG-Gal4; BubRI RNAi#1</i>                                                                                                                          |
|                               | <i>+/+; CG-Gal4; BubRI RNAi#2</i>                                                                                                                          |
| <b>Figure 3</b>               |                                                                                                                                                            |
| <b>A, B, C, D, E, F</b>       | <i>w<sup>-</sup>; CG-Gal4; +/+</i>                                                                                                                         |
|                               | <i>+/+; CG-Gal4; BubRI RNAi#1</i>                                                                                                                          |
| <b>Figure 4</b>               |                                                                                                                                                            |
| <b>A, B, C</b>                | <i>w<sup>-</sup>; CG-Gal4; +/+</i>                                                                                                                         |
|                               | <i>+/+; CG-Gal4; BubRI RNAi#1</i>                                                                                                                          |
|                               | <i>+/+; CG-Gal4; BubRI RNAi#1, UAS-LacZ</i>                                                                                                                |
|                               | <i>+/+; CG-Gal4; BubRI RNAi#1, UAS-Flag-Rel.68</i>                                                                                                         |
| <b>D</b>                      | <i>w<sup>-</sup>; CG-Gal4; +/+</i>                                                                                                                         |
|                               | <i>+/+; CG-Gal4; BubRI RNAi#1</i>                                                                                                                          |
|                               | <i>+/+; CG-Gal4; BubRI RNAi#1, UAS-Flag-Rel.68</i>                                                                                                         |
|                               | <i>+/+; CG-Gal4; BubRI RNAi#2</i>                                                                                                                          |
| <b>E</b>                      | <i>+/+; CG-Gal4; BubRI RNAi#2, UAS-Flag-Rel.68</i>                                                                                                         |
|                               | <i>w<sup>-</sup>; CG-Gal4; +/+</i>                                                                                                                         |
|                               | <i>+/+; CG-Gal4; BubRI RNAi#1</i>                                                                                                                          |
| <b>Supplementary Figure 1</b> | <i>+/+; CG-Gal4; BubRI RNAi#1, UAS-LacZ</i>                                                                                                                |
|                               | <i>+/+; CG-Gal4; BubRI RNAi#1, Bmm RNAi</i>                                                                                                                |
|                               |                                                                                                                                                            |
| <b>Supplementary Figure 1</b> | <i>w<sup>-</sup>; Act5C-GAL4; tub-gal80ts</i>                                                                                                              |
|                               | <i>+/+; Act5C-GAL4; tub-gal80ts/BubRI RNAi#1</i>                                                                                                           |
|                               | <i>+/+; Act5C-GAL4; tub-gal80ts/BubRI RNAi#2</i>                                                                                                           |
| <b>Supplementary Figure 2</b> |                                                                                                                                                            |
| <b>A, B, C, D, E</b>          | <i>w; +/+; r4-Gal4</i>                                                                                                                                     |
|                               | <i>+/+; +/+; r4-Gal4, BubRI RNAi#1</i>                                                                                                                     |
|                               | <i>+/+; +/+; r4-Gal4, BubRI RNAi#2</i>                                                                                                                     |

---

**Supplementary Figure 3**

---

**A**  $w^r; +/+; +/+$   
 $w^r; BubR1^{M101546}/BubR1^{k03113}; +/+$

**B**  $w; CG-Gal4; +/+$   
 $+/+; CG-Gal4; UAS-Flag-Rel.68$

**D, E**  $+/+; CG-Gal4; UAS-Flag-Rel.68$   
 $X^{UAS-BubR1}; CG-Gal4; UAS-Flag-Rel.68$

---

**Supplementary Figure 4**

---

**A, B, C**  $w; CG-Gal4; +/+$   
 $+/+; CG-Gal4; BubR1 RNAi\#2$   
 $+/+; CG-Gal4; BubR1 RNAi\#2, UAS-LacZ$   
 $+/+; CG-Gal4; BubR1 RNAi\#2, UAS-Flag-Rel.68$

**D**  $w; CG-Gal4; +/+$   
 $+/+; CG-Gal4; BubR1 RNAi\#2$   
 $+/+; CG-Gal4; BubR1 RNAi\#2, UAS-LacZ$   
 $+/+; CG-Gal4; BubR1 RNAi\#2, Bmm RNAi$

**E**  $w; CG-Gal4; +/+$   
 $+/+; CG-Gal4; BubR1 RNAi\#1$   
 $+/+; CG-Gal4; BubR1 RNAi\#1, UAS-Flag-Rel.68$   
 $+/+; CG-Gal4; BubR1 RNAi\#2$   
 $+/+; CG-Gal4; BubR1 RNAi\#2, UAS-Flag-Rel.68$

---
