# Supplementary material for: BubR1 controls starvation-induced lipolysis via IMD signaling pathway in Drosophila
Source: Aging (Albany NY). 2024 Feb 8;16(4):3257–79. doi: 10.18632/aging.205533 (PMC10929803; doi:10.18632/aging.205533)
Supplement: Supplementary Table 2 [file aging-16-205533-s003.xlsx]

## Sheet: BubR1_S-vs_WT_S-all gene
Supplementary Table 2. List of gene counts from RNA-seq with starvation (CGGal4>W1118 and CGGal4>BubR1 RNAi#1)
gene_id	stv_35329_1	stv_35329_2	stv_ctl_1	stv_ctl_2	stv_KD	stv_WT	log2FoldChange	pvalue	padj	gene_name	gene_chr	gene_start	gene_end	gene_strand	gene_length	gene_biotype	gene_description	tf_family
FBgn0032055	8504.8	5235.07	865.254	1029.8	6869.93	947.525	2.85813	2.39983e-21	2.19464e-17	Sgp	2L	8519690	8521809	+	1796	protein_coding	- && Q0P5J1.1 RecName: Full=Fatty acyl-CoA reductase 2; AltName: Full=Male sterility domain-containing protein 1 && PF07993:Male sterility protein|PF03015:Male sterility protein	NAD_binding_4
FBgn0039798	351.749	581.802	1.83123	0.925244	466.776	1.37823	8.40102	8.76991e-20	4.01004e-16	CG11313	3R	30729837	30731165	-	1222	protein_coding	- && Q9V3Z2.1 RecName: Full=Serine protease 7; AltName: Full=Melanization protease 2; Flags: Precursor && PF00089:Trypsin|PF12032:Regulatory CLIP domain of proteinases	Trypsin
FBgn0013772	16.75	26.4456	245.384	308.106	21.5978	276.745	-3.68588	4.99823e-16	1.52363e-12	Cyp6a8	2R	14887171	14889010	-	1781	protein_coding	- && Q27593.2 RecName: Full=Cytochrome P450 6a8; AltName: Full=CYPVIA8 && PF00067:Cytochrome P450	p450
FBgn0050197	841.686	1287.78	226.156	198.002	1064.73	212.079	2.32746	2.27382e-13	4.90556e-10	CG30197	2R	14514030	14514992	+	481	protein_coding	- && - && -	-
novel.12	146.562	156.374	0.915613	6.47671	151.468	3.69616	5.36046	2.6821e-13	4.90556e-10	-	2L	22462898	22468046	+	280	-	- && - && -	-
FBgn0038470	5.23437	8.04865	99.8018	321.985	6.64151	210.893	-4.99579	9.5785e-12	1.45992e-08	CG18213	3R	17036394	17040203	-	2997	protein_coding	- && - && -	-
FBgn0027550	611.374	899.149	99.8018	166.544	755.261	133.173	2.50357	1.47593e-11	1.92819e-08	CG6495	2L	10761116	10764971	+	2581	protein_coding	- && - && PF07502:MANEC domain|PF00057:Low-density lipoprotein receptor domain class A	Ldl_recept_a
FBgn0052191	1328.48	1966.17	386.389	450.594	1647.33	418.491	1.97668	2.56955e-11	2.93731e-08	CG32191	3L	17806451	17809146	-	2419	protein_coding	- && P50429.3 RecName: Full=Arylsulfatase B; Short=ASB; AltName: Full=N-acetylgalactosamine-4-sulfatase; Short=G4S; Flags: Precursor && PF00884:Sulfatase	Sulfatase
FBgn0052302	14.6562	2.29961	157.485	210.956	8.47792	184.22	-4.41881	3.16257e-11	3.21353e-08	CG32302	3L	2268825	2269903	+	1079	protein_coding	- && - && PF01607:Chitin binding Peritrophin-A domain	CBM_14
FBgn0051004	26.1718	18.3969	200.519	184.123	22.2844	192.321	-3.10494	4.32239e-11	3.95282e-08	mesh	3R	31178389	31195762	-	5175	protein_coding	- && Q0KHY3.2 RecName: Full=Protein mesh; Flags: Precursor && PF03782:AMOP domain|PF06119:Nidogen-like|PF00094:von Willebrand factor type D domain	VWD
FBgn0037974	2.09375	5.74903	88.8145	213.731	3.92139	151.273	-5.28931	7.13762e-11	5.93396e-08	CG12224	3R	11980704	11982062	-	1147	protein_coding	- && O81884.1 RecName: Full=L-galactose dehydrogenase; Short=At-GalDH; Short=L-GalDH && PF00248:Aldo/keto reductase family	Aldo_ket_red
FBgn0031765	7.32811	1.14981	88.8145	228.535	4.23896	158.675	-5.19854	2.66442e-10	2.03051e-07	CG9109	2L	6025870	6034423	-	1842	protein_coding	- && Q8BHT6.3 RecName: Full=Beta-1,3-glucosyltransferase; Short=Beta3Glc-T; AltName: Full=Beta 3-glucosyltransferase; AltName: Full=Beta-3-glycosyltransferase-like && PF02434:Fringe-like	Fringe
FBgn0261859	1218.56	1543.04	335.114	449.668	1380.8	392.391	1.81504	3.39562e-10	2.31447e-07	CG42788	3R	15095957	15131926	-	6686	protein_coding	- && Q14CM0.1 RecName: Full=FERM and PDZ domain-containing protein 4; AltName: Full=PDZ domain-containing protein 10; AltName: Full=PSD-95-interacting regulator of spine morphogenesis; Short=Preso && PF00373:FERM central domain|PF00397:WW domain|PF00595:PDZ domain (Also known as DHR or GLGF)	PDZ
FBgn0034647	1370.36	2268.57	225.241	440.416	1819.46	332.828	2.45061	3.54321e-10	2.31447e-07	pirk	2R	21660967	21662995	-	1846	protein_coding	- && - && -	-
FBgn0042119	187.39	320.796	39.3714	32.3835	254.093	35.8774	2.82318	6.11444e-10	3.58533e-07	Cpr65Au	3L	6131242	6132109	-	526	protein_coding	- && O02443.1 RecName: Full=Larval cuticle protein 1; Flags: Precursor && PF00379:Insect cuticle protein	Chitin_bind_4
FBgn0004240	1705.36	735.876	5474.45	7506.5	1220.62	6490.48	-2.41038	6.27286e-10	3.58533e-07	DptA	2R	18865765	18866260	+	496	protein_coding	- && P24492.1 RecName: Full=Diptericin; Flags: Precursor && -	-
novel.74	83.7499	98.8834	3.66245	2.77573	91.3166	3.21909	4.82506	1.04811e-09	5.63821e-07	-	X	11870	25276	-	6036	-	- && Q9VV73.1 RecName: Full=Nuclear RNA export factor 2 && PF03943:TAP C-terminal domain	-
FBgn0032382	125690	63960.3	20111.4	25038	94825	22574.7	2.07056	1.2905e-09	6.55644e-07	Mal-B2	2L	11849958	11852881	+	2328	protein_coding	- && O16099.2 RecName: Full=Maltase 2; Flags: Precursor && PF00128:Alpha amylase, catalytic domain	-
FBgn0039312	93.1717	89.6849	1.83123	4.62622	91.4283	3.22872	4.82579	1.64253e-09	7.51768e-07	CG10514	3R	25278427	25279846	-	1358	protein_coding	- && - && PF02958:Ecdysteroid kinase	-
FBgn0011703	55.4843	32.1946	249.962	275.723	43.8394	262.842	-2.57934	1.64411e-09	7.51768e-07	RnrL	2L	10325026	10327943	-	2577	protein_coding	- && P48591.2 RecName: Full=Ribonucleoside-diphosphate reductase large subunit; AltName: Full=Ribonucleoside-diphosphate reductase subunit M1; AltName: Full=Ribonucleotide reductase large subunit && PF00317:Ribonucleotide reductase, all-alpha domain|PF03477:ATP cone domain|PF02867:Ribonucleotide reductase, barrel domain	Ribonuc_red_lgC
FBgn0037126	124.578	158.673	925.685	490.379	141.626	708.032	-2.32261	2.15885e-09	9.40127e-07	CG14567	3L	21737706	21738430	-	725	protein_coding	- && - && -	-
FBgn0030313	0	0	72.3334	133.235	0	102.784	-8.9923	1.17851e-08	4.89886e-06	Reepl1	X	11572707	11573640	+	934	protein_coding	- && Q8K072.1 RecName: Full=Receptor expression-enhancing protein 4 && PF03134:TB2/DP1, HVA22 family	TB2_DP1_HVA22
FBgn0013681	15045.7	17152.8	6980.63	6760.76	16099.2	6870.69	1.22845	1.44677e-08	5.56077e-06	mt:ND3	mitochondrion_genome	5608	5961	+	354	protein_coding	- && P18930.1 RecName: Full=NADH-ubiquinone oxidoreductase chain 3; AltName: Full=NADH dehydrogenase subunit 3 && -	-
FBgn0264748	106.781	60.9397	333.283	654.147	83.8604	493.715	-2.55523	1.45936e-08	5.56077e-06	CG44006	3L	18068728	18070150	-	1240	protein_coding	- && - && -	-
FBgn0031327	1130.62	1332.63	458.722	472.799	1231.62	465.761	1.40274	2.99466e-08	1.09545e-05	CG5397	2L	1240036	1243018	+	2903	protein_coding	- && Q8BYM5.2 RecName: Full=Neuroligin-3; AltName: Full=Gliotactin homolog; Flags: Precursor && PF00135:Carboxylesterase family	COesterase
FBgn0032805	56.5312	42.5428	195.026	440.416	49.537	317.721	-2.67942	5.02109e-08	1.76607e-05	CG10337	2L	19545376	19546959	-	1297	protein_coding	- && - && PF03188:Eukaryotic cytochrome b561	Cytochrom_B561
FBgn0037248	255.437	217.313	639.098	749.447	236.375	694.273	-1.55379	6.22043e-08	2.10688e-05	srl	3R	4422483	4429335	-	4642	protein_coding	- && Q6NZN1.1 RecName: Full=Peroxisome proliferator-activated receptor gamma coactivator-related protein 1; AltName: Full=PGC-1-related coactivator; Short=PRC && PF00076:RNA recognition motif. (a.k.a. RRM, RBD, or RNP domain)	RRM_1
FBgn0031881	145.515	186.269	512.743	527.389	165.892	520.066	-1.6496	7.66345e-08	2.43862e-05	MME1	2L	7027526	7028959	+	1245	protein_coding	- && Q9VQG4.1 RecName: Full=Congested-like trachea protein && PF00153:Mitochondrial carrier protein	Mito_carr
FBgn0266420	32.4531	17.2471	140.089	220.208	24.8501	180.148	-2.85192	7.73317e-08	2.43862e-05	Ote	2R	18275607	18277177	-	1571	protein_coding	- && P20240.2 RecName: Full=Otefin && PF03020:LEM domain	-
FBgn0032713	2529.25	2868.77	687.625	1097.34	2699.01	892.482	1.59653	9.10673e-08	2.77603e-05	Ugt36D1	2L	18823548	18826716	+	2275	protein_coding	- && Q1LZI1.1 RecName: Full=UDP-glucuronosyltransferase 3A1; Short=UDPGT 3A1; Flags: Precursor && PF00201:UDP-glucoronosyl and UDP-glucosyl transferase	UDPGT
FBgn0261385	46.0624	58.6401	226.156	227.61	52.3513	226.883	-2.11767	1.03933e-07	3.06602e-05	scra	2R	7590119	7595242	+	4447	protein_coding	- && Q9V4P1.3 RecName: Full=Anillin; AltName: Full=Actin-binding protein 8; Short=ABP8; AltName: Full=Protein scraps && PF00169:PH domain|PF08174:Cell division protein anillin|PF16018:Anillin N-terminus	PH
FBgn0000092	88.9842	152.924	15.5654	12.9534	120.954	14.2594	3.08307	1.65507e-07	4.72989e-05	CG2650	X	2692732	2693886	-	1013	protein_coding	- && O76879.2 RecName: Full=Circadian clock-controlled protein; Flags: Precursor && PF06585:Haemolymph juvenile hormone binding protein (JHBP)	-
FBgn0029830	660.577	430.028	1420.12	2444.49	545.302	1932.3	-1.82471	2.70296e-07	7.43979e-05	Grip	X	5966279	5986699	+	3764	protein_coding	- && A8E0R9.2 RecName: Full=Glutamate receptor-interacting protein 2; Short=xGRIP2; Short=xGRIP2.1 && PF00595:PDZ domain (Also known as DHR or GLGF)	PDZ
FBgn0037807	33.4999	19.5467	238.059	128.609	26.5233	183.334	-2.78463	2.76602e-07	7.43979e-05	CG6293	3R	10307806	10311613	-	2601	protein_coding	- && B0JZG0.1 RecName: Full=Solute carrier family 23 member 2; AltName: Full=Na(+)/L-ascorbic acid transporter 2; AltName: Full=Sodium-dependent vitamin C transporter 2 && PF00860:Permease family	-
FBgn0063494	525.53	285.152	1157.33	2349.19	405.341	1753.26	-2.11217	3.48901e-07	9.11628e-05	GstE6	2R	18406011	18406761	+	751	protein_coding	- && P46430.1 RecName: Full=Glutathione S-transferase 1; AltName: Full=GST class-theta [Manduca sexta] && PF00043:Glutathione S-transferase, C-terminal domain|PF13417:Glutathione S-transferase, N-terminal domain	GST_C
FBgn0052187	93.1717	190.868	10.9874	21.2806	142.02	16.134	3.13744	3.64157e-07	9.2506e-05	CG32187	3L	17804916	17806365	-	1326	protein_coding	- && - && -	-
FBgn0033203	2424.56	2976.85	1206.78	1077.91	2700.7	1142.34	1.24123	4.23468e-07	0.000104665	CG2070	2R	7661855	7663408	+	1381	protein_coding	- && Q8NBN7.2 RecName: Full=Retinol dehydrogenase 13; AltName: Full=Short chain dehydrogenase/reductase family 7C member 3 && PF00106:short chain dehydrogenase	adh_short
FBgn0030594	538.093	396.683	143.751	159.142	467.388	151.447	1.62634	6.44751e-07	0.000154813	fiz	X	14906334	14909708	-	2980	protein_coding	- && P18173.3 RecName: Full=Glucose dehydrogenase [FAD, quinone]; Contains: RecName: Full=Glucose dehydrogenase [FAD, quinone] short protein; Flags: Precursor && PF05199:GMC oxidoreductase|PF00732:GMC oxidoreductase	-
FBgn0033446	23026	25584.3	12015.6	9568.87	24305.2	10792.2	1.17126	6.76593e-07	0.000154813	CG1648	2R	9810974	9820053	-	1443	protein_coding	- && - && -	-
FBgn0052282	232.406	434.627	86.0676	55.5146	333.516	70.7911	2.23518	6.77149e-07	0.000154813	Drsl4	3L	3315620	3315942	+	323	protein_coding	- && P41964.1 RecName: Full=Drosomycin; AltName: Full=Cysteine-rich peptide; Flags: Precursor && -	-
FBgn0286786	238.687	304.699	666.566	1005.74	271.693	836.153	-1.62238	7.23188e-07	0.000161306	hoip	2L	9699791	9700459	+	607	protein_coding	- && Q9U3Z7.1 RecName: Full=NHP2-like protein 1 homolog; AltName: Full=Protein hoi-polloi && PF01248:Ribosomal protein L7Ae/L30e/S12e/Gadd45 family	-
FBgn0034312	75.3749	94.2841	233.481	913.215	84.8295	573.348	-2.75735	8.57738e-07	0.000186762	CG10916	2R	18173669	18175725	+	2057	protein_coding	- && - && PF13639:Ring finger domain|PF11901:Protein of unknown function (DUF3421)	-
FBgn0039324	175.875	52.8911	1.83123	10.1777	114.383	6.00445	4.25474	9.6452e-07	0.000205129	CG10553	3R	25316461	25318111	-	1442	protein_coding	- && - && PF02958:Ecdysteroid kinase	-
FBgn0033574	274.281	349.541	101.633	81.4214	311.911	91.5272	1.76825	1.05644e-06	0.000219572	Spn47C	2R	10938425	10941738	-	3169	protein_coding	- && P48594.2 RecName: Full=Serpin B4; AltName: Full=Leupin; AltName: Full=Peptidase inhibitor 11; Short=PI-11; AltName: Full=Squamous cell carcinoma antigen 2; Short=SCCA-2 && PF00079:Serpin (serine protease inhibitor)	Serpin
FBgn0027073	9861.55	12882.4	4140.4	5277.59	11372	4709	1.27197	1.11281e-06	0.000226148	Ugt49B1	2R	21212880	21214972	-	1754	protein_coding	- && P36511.1 RecName: Full=UDP-glucuronosyltransferase 2B15; Short=UDPGT 2B15; AltName: Full=UDP-glucuronosyltransferase 2B36; Short=UDPGT 2B36; Flags: Precursor && PF00201:UDP-glucoronosyl and UDP-glucosyl transferase	UDPGT
FBgn0003082	23.0312	13.7977	125.439	113.805	18.4144	119.622	-2.69381	1.18918e-06	0.000236414	phr	2R	7825289	7827319	+	1969	protein_coding	- && Q28811.1 RecName: Full=Deoxyribodipyrimidine photo-lyase; AltName: Full=DNA photolyase; AltName: Full=Photoreactivating enzyme && PF00875:DNA photolyase|PF03441:FAD binding domain of DNA photolyase	-
FBgn0052185	28.2656	9.19845	111.705	208.18	18.732	159.942	-3.08483	1.21566e-06	0.000236536	edin	3L	17494880	17495300	+	421	protein_coding	- && - && -	-
FBgn0040237	553.796	592.15	1210.44	1510	572.973	1360.22	-1.24741	1.49685e-06	0.000285181	bor	3R	16261355	16264115	-	2457	protein_coding	- && Q58E76.1 RecName: Full=ATPase family AAA domain-containing protein 3-A && PF12037:Domain of unknown function (DUF3523)|PF00004:ATPase family associated with various cellular activities (AAA)	AAA
FBgn0030593	11964.7	21316.3	5755.54	6120.49	16640.5	5938.01	1.48662	1.85601e-06	0.000346392	CG9512	X	14901844	14905549	-	2221	protein_coding	- && P18172.4 RecName: Full=Glucose dehydrogenase [FAD, quinone]; Contains: RecName: Full=Glucose dehydrogenase [FAD, quinone] short protein; Flags: Precursor && PF05199:GMC oxidoreductase|PF00732:GMC oxidoreductase	-
FBgn0027259	9.42186	17.2471	86.9832	117.506	13.3345	102.245	-2.9461	2.24689e-06	0.000404219	Kmn1	X	11571383	11572442	-	1002	protein_coding	- && - && -	-
FBgn0034741	52.3437	34.4942	121.777	642.119	43.4189	381.948	-3.13534	2.25425e-06	0.000404219	CG4269	2R	22597245	22600695	+	1783	protein_coding	- && - && -	-
FBgn0039155	41.8749	67.8386	354.342	179.497	54.8568	266.92	-2.28536	2.89448e-06	0.000509038	Kal1	3R	24141395	24147490	+	1993	protein_coding	- && P23352.3 RecName: Full=Anosmin-1; AltName: Full=Adhesion molecule-like X-linked; AltName: Full=Kallmann syndrome protein; Flags: Precursor && PF00095:WAP-type (Whey Acidic Protein) 'four-disulfide core'	-
FBgn0033819	5.23437	3.44942	25.6372	195.226	4.34189	110.432	-4.66277	3.25136e-06	0.000561012	CG4714	2R	13251852	13254337	-	2355	protein_coding	- && - && PF13870:Domain of unknown function (DUF4201)	-
FBgn0028426	216.703	227.662	490.769	1716.33	222.182	1103.55	-2.31237	3.57007e-06	0.000599714	RNaseZ	2R	10307030	10309794	-	2707	protein_coding	- && Q8MKW7.2 RecName: Full=Ribonuclease Z, mitochondrial; Short=RNase Z; AltName: Full=Juvenile hormone-inducible protein 1; AltName: Full=dRNAse Z; AltName: Full=tRNA 3 endonuclease; Short=DmeZ; AltName: Full=tRNase Z; Flags: Precursor && PF13691:tRNase Z endonuclease|PF12706:Beta-lactamase superfamily domain	-
FBgn0250869	926.483	619.746	2319.25	1769.99	773.114	2044.62	-1.40266	3.60681e-06	0.000599714	CG42240	X	6330842	6333028	+	2187	protein_coding	- && - && -	-
FBgn0032913	187.39	33.3444	4.57806	8.32719	110.367	6.45263	4.09847	4.08163e-06	0.000666544	CG9259	2L	21089375	21090999	+	1566	protein_coding	- && - && PF02958:Ecdysteroid kinase	-
FBgn0085195	4844.93	8090.04	2692.82	2142.86	6467.48	2417.84	1.41942	4.83609e-06	0.000770882	CG34166	2L	14743193	14743879	+	613	protein_coding	- && - && -	-
FBgn0266064	8350.91	10170	4650.4	4231.14	9260.47	4440.77	1.06024	4.88914e-06	0.000770882	GlyS	3R	15141843	15147531	-	3340	protein_coding	- && Q9VFC8.2 RecName: Full=Glycogen [starch] synthase; AltName: Full=Glycogen synthase && PF05693:Glycogen synthase	-
FBgn0022338	105.734	100.033	357.089	269.246	102.884	313.167	-1.60567	6.57724e-06	0.00101947	dnk	3R	18980995	18982749	+	1393	protein_coding	- && Q9XZT6.1 RecName: Full=Deoxynucleoside kinase; AltName: Full=Deoxyribonucleoside kinase; Short=Dm-dNK; AltName: Full=Multispecific deoxynucleoside kinase && PF01712:Deoxynucleoside kinase	-
FBgn0000008	606.14	962.388	304.899	246.115	784.264	275.507	1.50879	6.70322e-06	0.00102168	a	2R	22136968	22172834	+	5414	protein_coding	- && O15018.4 RecName: Full=PDZ domain-containing protein 2; AltName: Full=Activated in prostate cancer protein; AltName: Full=PDZ domain-containing protein 3; Contains: RecName: Full=Processed PDZ domain-containing protein 2 && PF00595:PDZ domain (Also known as DHR or GLGF)	PDZ
FBgn0029813	95.2655	101.183	9.15613	19.4301	98.2242	14.2931	2.78144	6.83121e-06	0.00102412	AgmNAT	X	5814864	5815820	-	957	protein_coding	- && Q94521.1 RecName: Full=Dopamine N-acetyltransferase; AltName: Full=Arylalkylamine N-acetyltransferase; Short=aaNAT1 && PF00583:Acetyltransferase (GNAT) family	Acetyltransf_1
FBgn0264746	5.23437	8.04865	51.2743	98.0758	6.64151	74.6751	-3.49738	7.06778e-06	0.0010425	CG44004	3L	18072362	18073863	-	1302	protein_coding	- && - && -	-
FBgn0261554	2406.76	2393.9	1171.98	1231.5	2400.33	1201.74	0.998115	7.73051e-06	0.00112215	CG42672	2R	21295652	21310411	+	7929	protein_coding	- && Q9ULH0.3 RecName: Full=Kinase D-interacting substrate of 220 kDa; AltName: Full=Ankyrin repeat-rich membrane-spanning protein && PF12796:Ankyrin repeats (3 copies)|PF07693:KAP family P-loop domain	-
FBgn0026737	72.2343	63.2394	186.785	360.845	67.7368	273.815	-2.0144	7.85965e-06	0.00112307	CG6171	3R	15362796	15363857	-	1001	protein_coding	- && A8JR14.1 RecName: Full=Aprataxin and PNK-like factor; AltName: Full=Apurinic-apyrimidinic endonuclease APLF && PF10283:Zinc-finger (CX5CX6HX5H) motif	-
FBgn0003676	720.249	711.73	1393.56	1728.36	715.99	1560.96	-1.12439	8.34371e-06	0.0011739	CCT1	3R	22489105	22491439	-	1980	protein_coding	- && P12613.2 RecName: Full=T-complex protein 1 subunit alpha; Short=TCP-1-alpha; AltName: Full=CCT-alpha && PF00118:TCP-1/cpn60 chaperonin family	-
FBgn0040502	101.547	113.831	14.6498	24.0563	107.689	19.3531	2.47645	9.59593e-06	0.00132962	CG8343	2R	6179726	6180356	+	631	protein_coding	- && - && PF00059:Lectin C-type domain	Lectin_C
FBgn0039094	289.984	221.913	65.9241	88.8234	255.948	77.3738	1.72666	1.04429e-05	0.00142537	CG10184	3R	23602507	23605495	-	1330	protein_coding	- && Q9FPH3.1 RecName: Full=Probable low-specificity L-threonine aldolase 2; AltName: Full=Threonine aldolase 2 && PF01212:Beta-eliminating lyase	Beta_elim_lyase
FBgn0036428	5424.9	9184.65	2268.89	3175.44	7304.78	2722.16	1.42404	1.18714e-05	0.00159654	Gbs-70E	3L	14540937	14550975	-	2846	protein_coding	- && Q5U2R5.1 RecName: Full=Protein phosphatase 1 regulatory subunit 3C; AltName: Full=Protein phosphatase 1 regulatory subunit 5; Short=PP1 subunit R5; AltName: Full=Protein targeting to glycogen; Short=PTG && PF03370:Carbohydrate/starch-binding module (family 21)	-
FBgn0265873	33.4999	40.2432	131.848	171.17	36.8716	151.509	-2.04034	1.27264e-05	0.00168671	lncRNA:CR44662	X	15077498	15081255	-	3758	ncRNA	- && - && -	-
FBgn0030347	1360.94	1188.9	576.836	627.315	1274.92	602.076	1.08254	1.29666e-05	0.00169399	CG15739	X	11873319	11875346	+	1529	protein_coding	- && P0AF25.1 RecName: Full=Ribonucleotide monophosphatase NagD >P0AF24.1 RecName: Full=Ribonucleotide monophosphatase NagD && PF13242:HAD-hyrolase-like|PF13344:Haloacid dehalogenase-like hydrolase	-
FBgn0038721	229.265	295.5	647.338	617.137	262.383	632.238	-1.26965	1.32295e-05	0.001704	subdued	3R	19633418	19642722	-	4351	protein_coding	- && Q8BHY3.2 RecName: Full=Anoctamin-1; AltName: Full=Transmembrane protein 16A && PF04547:Calcium-activated chloride channel|PF16178:Dimerisation domain of Ca+-activated chloride-channel, anoctamin	-
FBgn0044047	224.031	135.677	428.507	891.935	179.854	660.221	-1.87498	1.43919e-05	0.00182797	Ilp6	X	2331493	2334658	-	2413	protein_coding	- && Q9W4Z4.1 RecName: Full=Probable insulin-like peptide 6; Short=dILP6; AltName: Full=Insulin-related peptide 6; Contains: RecName: Full=Probable insulin-like peptide 6 A chain; Contains: RecName: Full=Probable insulin-like peptide 6 B chain; Flags: Precursor && -	-
FBgn0051161	40.8281	26.4456	129.101	163.768	33.6368	146.435	-2.11847	1.7246e-05	0.00216048	CG31161	3R	22616511	22618300	+	1666	protein_coding	- && - && -	-
FBgn0052581	623.937	573.753	275.599	184.123	598.845	229.861	1.38141	1.80633e-05	0.00223228	CG32581	X	15796908	15799162	-	1428	protein_coding	- && Q6PC78.1 RecName: Full=E3 ubiquitin-protein ligase RNF185; AltName: Full=RING finger protein 185 && PF13920:Zinc finger, C3HC4 type (RING finger)	-
FBgn0001187	24223.6	22021.1	12906.5	11233.4	23122.3	12069.9	0.937875	2.14658e-05	0.00261587	Hex-C	2R	15218837	15220329	-	1493	protein_coding	- && Q9NFT7.4 RecName: Full=Hexokinase type 2 && PF03727:Hexokinase|PF00349:Hexokinase	-
FBgn0035780	591.483	786.468	1.83123	22.2058	688.976	12.0185	5.8416	2.17393e-05	0.00261587	CG18417	3L	7400070	7401671	+	1480	protein_coding	- && P04069.1 RecName: Full=Carboxypeptidase B && PF00246:Zinc carboxypeptidase	-
FBgn0260474	611.374	1062.42	305.815	309.031	836.898	307.423	1.4444	2.41359e-05	0.00286653	CG30002	2R	9704384	9706147	+	1572	protein_coding	- && A0A126GUP6.1 RecName: Full=Melanization protease 1; Flags: Precursor && PF00089:Trypsin	Trypsin
FBgn0001226	660.577	761.172	1416.45	1472.99	710.875	1444.72	-1.02338	2.51312e-05	0.00294647	Hsp27	3L	9384063	9385694	+	1632	protein_coding	- && P02518.2 RecName: Full=Heat shock protein 27 && PF00011:Hsp20/alpha crystallin family	-
FBgn0050022	495.171	421.979	893.638	1374.91	458.575	1134.28	-1.30624	2.63698e-05	0.00305129	CG30022	2R	11387160	11388779	-	1356	protein_coding	- && Q9DCM0.2 RecName: Full=Persulfide dioxygenase ETHE1, mitochondrial; AltName: Full=Ethylmalonic encephalopathy protein 1 homolog; AltName: Full=Hepatoma subtracted clone one protein; AltName: Full=Sulfur dioxygenase ETHE1; Flags: Precursor && PF00753:Metallo-beta-lactamase superfamily	Lactamase_B
FBgn0267160	37.6874	65.539	4.57806	2.77573	51.6132	3.6769	3.80888	2.66925e-05	0.00305129	asRNA:CR45600	3R	15136985	15140121	-	2914	ncRNA	- && - && -	-
FBgn0031998	718.155	949.74	1962.16	1662.66	833.948	1812.41	-1.12024	3.0538e-05	0.00344778	SLC5A11	2L	8200465	8205132	-	2660	protein_coding	- && Q8N695.2 RecName: Full=Sodium-coupled monocarboxylate transporter 1; AltName: Full=Apical iodide transporter; AltName: Full=Electrogenic sodium monocarboxylate cotransporter; AltName: Full=Sodium iodide-related cotransporter; AltName: Full=Solute carrier family 5 member 8 && PF00474:Sodium:solute symporter family	-
FBgn0010470	3296.6	3865.65	1790.02	1895.82	3581.13	1842.92	0.958356	3.10973e-05	0.00345769	Fkbp14	2R	21487167	21497929	-	1800	protein_coding	- && P59024.1 RecName: Full=Peptidyl-prolyl cis-trans isomerase FKBP14; Short=PPIase FKBP14; AltName: Full=FK506-binding protein 14; Short=FKBP-14; AltName: Full=Rotamase; Flags: Precursor && PF00254:FKBP-type peptidyl-prolyl cis-trans isomerase	FKBP_C
FBgn0030241	4.18749	8.04865	238.975	15.7291	6.11807	127.352	-4.38591	3.19166e-05	0.00345769	feo	X	10852446	10854869	-	2424	protein_coding	- && O43663.2 RecName: Full=Protein regulator of cytokinesis 1 && PF03999:Microtubule associated protein (MAP65/ASE1 family)	-
FBgn0039459	255.437	144.876	59.5148	41.636	200.156	50.5754	1.9854	3.19833e-05	0.00345769	IntS12	3R	26863376	26864559	+	1184	protein_coding	- && Q9VBB3.1 RecName: Full=Integrator complex subunit 12 && PF00628:PHD-finger	PHD
FBgn0051313	3029.65	3533.36	1748.82	1212.99	3281.5	1480.91	1.1478	3.21382e-05	0.00345769	CG31313	3R	14566432	14567429	-	793	protein_coding	- && P23779.2 RecName: Full=Cystatin-like protein && PF00031:Cystatin domain	-
FBgn0030065	369.546	280.553	122.692	120.282	325.05	121.487	1.42042	3.7107e-05	0.00392896	CG12075	X	8838323	8872774	+	4917	protein_coding	- && - && -	-
FBgn0031913	5468.87	3409.18	10199	9964.87	4439.02	10081.9	-1.18336	3.73778e-05	0.00392896	CG5958	2L	7430530	7433516	-	1174	protein_coding	- && A6JFQ6.1 RecName: Full=Clavesin-1; AltName: Full=Retinaldehyde-binding protein 1-like 1 && PF00650:CRAL/TRIO domain	-
FBgn0032615	106.781	97.7336	5.49368	22.2058	102.257	13.8498	2.88557	3.86722e-05	0.00401884	CG6012	2L	16860029	16861489	-	1041	protein_coding	- && Q3SXM5.3 RecName: Full=Inactive hydroxysteroid dehydrogenase-like protein 1; AltName: Full=Short chain dehydrogenase/reductase family 12C member 3 && PF00106:short chain dehydrogenase	adh_short
FBgn0031688	9.42186	9.19845	88.8145	53.6641	9.31016	71.2393	-2.9356	4.25746e-05	0.004367	Cyp28d2	2L	5207267	5209345	+	1673	protein_coding	- && Q9VMT6.1 RecName: Full=Probable cytochrome P450 28d2; AltName: Full=CYPXXVIIID2 && PF00067:Cytochrome P450	p450
FBgn0035767	4008.48	3437.92	1703.96	2048.49	3723.2	1876.22	0.988778	4.29776e-05	0.004367	Cln7	3L	7341884	7345183	-	2168	protein_coding	- && Q6GPQ3.1 RecName: Full=Major facilitator superfamily domain-containing protein 8 && PF07690:Major Facilitator Superfamily	MFS_1
FBgn0265042	100.5	59.7899	7.3249	14.8039	80.1449	11.0644	2.85864	4.35885e-05	0.00438041	Irk1	3R	23168317	23185642	+	5246	protein_coding	- && P52187.2 RecName: Full=ATP-sensitive inward rectifier potassium channel 12; AltName: Full=Inward rectifier K(+) channel Kir2.2; Short=IRK-2; AltName: Full=Potassium channel, inwardly rectifying subfamily J member 12 && PF01007:Inward rectifier potassium channel	-
FBgn0030251	5476.19	7258.73	3005.96	3294.79	6367.46	3150.37	1.01514	4.64902e-05	0.00462123	CG2145	X	10927399	10929712	+	2045	protein_coding	- && Q9VZ49.1 RecName: Full=Poly(U)-specific endoribonuclease homolog; AltName: Full=Protein endoU; AltName: Full=Uridylate-specific endoribonuclease homolog; Flags: Precursor && PF09412:Endoribonuclease XendoU	-
FBgn0260986	0	0	64.0929	10.1777	0	37.1353	-7.52384	5.20764e-05	0.00512085	mei-38	X	1477063	1481420	+	1749	protein_coding	- && - && PF06886:Targeting protein for Xklp2 (TPX2)	-
FBgn0034259	337.093	430.028	770.946	946.524	383.56	858.735	-1.16331	5.38673e-05	0.0052406	P32	2R	17671309	17672640	-	1154	protein_coding	- && O35796.2 RecName: Full=Complement component 1 Q subcomponent-binding protein, mitochondrial; AltName: Full=GC1q-R protein; AltName: Full=Glycoprotein gC1qBP; Short=C1qBP; Flags: Precursor && PF02330:Mitochondrial glycoprotein	-
FBgn0001224	85.8436	157.524	998.018	244.264	121.684	621.141	-2.35291	5.51212e-05	0.00530614	Hsp23	3L	9381882	9382765	+	884	protein_coding	- && P02516.2 RecName: Full=Heat shock protein 23 && PF00011:Hsp20/alpha crystallin family	-
FBgn0036502	271.14	295.5	570.427	670.802	283.32	620.614	-1.13153	5.87156e-05	0.00559328	CG7841	3L	15505188	15508252	-	1628	protein_coding	- && Q9CQB2.1 RecName: Full=MAPK regulated corepressor interacting protein 2; AltName: Full=Protein FAM195A && PF14799:FAM195 family	-
FBgn0025454	27196.7	23325	10700.8	14364.4	25260.8	12532.6	1.01123	6.33634e-05	0.0059738	Cyp6g1	2R	12185667	12188431	+	2074	protein_coding	- && Q9V674.1 RecName: Full=Cytochrome P450 6g1; AltName: Full=CYPVIG1; AltName: Full=Cyp6-like protein && PF00067:Cytochrome P450	p450
FBgn0004926	2097.93	2249.02	3748.52	4680.81	2173.48	4214.66	-0.955448	6.61091e-05	0.00616906	eIF2beta	3L	12525093	12526731	-	1128	protein_coding	- && P41375.1 RecName: Full=Eukaryotic translation initiation factor 2 subunit 2; AltName: Full=Eukaryotic translation initiation factor 2 subunit beta; Short=eIF-2-beta && PF01873:Domain found in IF2B/IF5	-
FBgn0010278	340.234	234.561	567.68	1191.71	287.397	879.697	-1.61334	7.05839e-05	0.0065201	Ssrp	2R	23806361	23809004	-	2507	protein_coding	- && Q05344.2 RecName: Full=FACT complex subunit Ssrp1; AltName: Full=Chorion-factor 5; AltName: Full=Facilitates chromatin transcription complex subunit Ssrp1; AltName: Full=Recombination signal sequence recognition protein; AltName: Full=Single-strand recognition protein; AltName: Full=dSSRP1 && PF08512:Histone chaperone Rttp106-like|PF00505:HMG (high mobility group) box|PF03531:Structure-speci…	HMG_box
FBgn0032387	703.499	595.6	238.059	323.835	649.549	280.947	1.20944	7.43598e-05	0.0068002	CG16965	2L	11981591	11984380	+	2300	protein_coding	- && Q8BP56.1 RecName: Full=Acid trehalase-like protein 1 && PF03632:Glycosyl hydrolase family 65 central catalytic domain	-
FBgn0051633	79.5624	91.9845	181.291	516.286	85.7734	348.789	-2.02415	7.85204e-05	0.0071096	CG31633	2L	6654760	6656321	-	1452	protein_coding	- && - && -	-
FBgn0000078	1672.9	1014.13	2718.45	3767.59	1343.52	3243.02	-1.27105	8.46756e-05	0.00759174	Amy-d	2R	17124764	17126369	+	1606	protein_coding	- && P81641.3 RecName: Full=Alpha-amylase B; AltName: Full=1,4-alpha-D-glucan glucanohydrolase; Flags: Precursor && PF02806:Alpha amylase, C-terminal all-beta domain|PF00128:Alpha amylase, catalytic domain	-
FBgn0040735	1622.65	1217.65	718.756	641.194	1420.15	679.975	1.06269	8.66198e-05	0.00769066	CG16836	2R	18388995	18389443	+	383	protein_coding	- && - && -	-
FBgn0050042	2621.37	3795.51	1641.69	1332.35	3208.44	1487.02	1.10932	8.8712e-05	0.00780068	Cpr49Ab	2R	12378440	12379396	+	852	protein_coding	- && Q08738.2 RecName: Full=Larval cuticle protein LCP-30; Flags: Precursor && PF00379:Insect cuticle protein	Chitin_bind_4
FBgn0032322	2731.29	3411.48	1682.9	1436.9	3071.38	1559.9	0.977334	9.37913e-05	0.00816878	CG16743	2L	10972280	10973408	+	1013	protein_coding	- && - && -	-
FBgn0027601	6704.18	6013.49	13019.1	10743	6358.83	11881.1	-0.901807	9.74916e-05	0.00841095	pdgy	X	14933670	14953532	-	3474	protein_coding	- && Q6ETN3.1 RecName: Full=Probable 4-coumarate--CoA ligase 3; Short=4CL 3; Short=Os4CL3; AltName: Full=4-coumaroyl-CoA synthase 3 && PF13193:AMP-binding enzyme C-terminal domain|PF00501:AMP-binding enzyme	AMP-binding
FBgn0031888	45.0156	43.6926	110.789	267.395	44.3541	189.092	-2.09167	0.00010354	0.00884926	Pvf2	2L	7069536	7084635	-	2102	protein_coding	- && - && PF00341:PDGF/VEGF domain	-
FBgn0027330	104.687	128.778	238.059	570.875	116.733	404.467	-1.79336	0.000106187	0.00899147	l(1)G0020	X	8716713	8720277	-	3250	protein_coding	- && Q9W3C1.2 RecName: Full=RNA cytidine acetyltransferase; AltName: Full=18S rRNA cytosine acetyltransferase; AltName: Full=Polycomb protein l(1)G0020; AltName: Full=p110 && PF13725:Possible tRNA binding domain|PF05127:Helicase|PF13718:GNAT acetyltransferase 2|PF08351:Domain of unknown function (DUF1726)	-
FBgn0038820	117.25	189.718	47.6119	33.3088	153.484	40.4603	1.92224	0.000110637	0.00919819	CG4000	3R	20676224	20677351	-	999	protein_coding	- && - && -	-
FBgn0034122	113.062	147.175	21.9747	40.7107	130.119	31.3427	2.05348	0.00011064	0.00919819	CG15711	2R	16363551	16365895	-	2345	protein_coding	- && - && PF15883:Domain of unknown function (DUF4736)	-
FBgn0013972	484.702	595.6	162.979	261.844	540.151	212.412	1.34638	0.000113827	0.00933272	Gycalpha99B	3R	29682503	29685758	+	2354	protein_coding	- && Q07093.2 RecName: Full=Head-specific guanylate cyclase; AltName: Full=Gycalpha99B && PF07700:Haem-NO-binding|PF00211:Adenylate and Guanylate cyclase catalytic domain|PF07701:Heme NO binding associated	Guanylate_cyc
FBgn0011638	913.92	975.036	1573.94	4062.74	944.478	2818.34	-1.57728	0.000114299	0.00933272	La	2L	20348393	20350012	-	1549	protein_coding	- && P40796.2 RecName: Full=La protein homolog; AltName: Full=La autoantigen homolog; AltName: Full=La ribonucleoprotein && PF05383:La domain|PF08777:RNA binding motif	-
FBgn0034808	1797.48	1764.95	749.887	1013.14	1781.22	881.514	1.01485	0.000117539	0.00951234	CG9896	2R	22993669	22998884	-	2043	protein_coding	- && - && -	-
FBgn0015623	107655	124326	45525.2	67330	115991	56427.6	1.03954	0.000126176	0.0100745	Cpr	2L	6338836	6346280	+	3344	protein_coding	- && Q27597.2 RecName: Full=NADPH--cytochrome P450 reductase; Short=CPR; Short=P450R && PF00667:FAD binding domain|PF00258:Flavodoxin|PF00175:Oxidoreductase NAD-binding domain	NAD_binding_1
FBgn0033775	444.921	525.462	86.9832	212.806	485.191	149.895	1.69467	0.000126688	0.0100745	Cyp9h1	2R	12840813	12842558	-	1617	protein_coding	- && Q9V6H1.1 RecName: Full=Probable cytochrome P450 9h1; AltName: Full=CYPIXH1 && PF00067:Cytochrome P450	p450
FBgn0038337	214.609	133.378	51.2743	52.7389	173.993	52.0066	1.74334	0.000128485	0.0101293	CG6125	3R	15402598	15407070	-	2532	protein_coding	- && Q86WA9.2 RecName: Full=Sodium-independent sulfate anion transporter; AltName: Full=Solute carrier family 26 member 11 && PF00916:Sulfate permease family	Sulfate_transp
FBgn0030041	19728.3	31244.8	11015.7	12784.1	25486.6	11899.9	1.09877	0.000134378	0.0105033	CG12116	X	8467443	8469012	-	1570	protein_coding	- && - && PF00106:short chain dehydrogenase	adh_short
FBgn0034407	2766.89	3032.04	5598.97	4908.42	2899.46	5253.7	-0.857598	0.000139545	0.0108147	DptB	2R	18867391	18867895	+	449	protein_coding	- && P18684.1 RecName: Full=Diptericin-D; Flags: Precursor && PF03769:Attacin, C-terminal region	-
FBgn0039488	82.703	86.2355	186.785	336.789	84.4692	261.787	-1.632	0.000142216	0.0109292	CG6066	3R	27115152	27116707	-	1556	protein_coding	- && Q9VB74.1 RecName: Full=NKAP family protein CG6066 && PF06047:Ras-induced vulval development antagonist	-
novel.41	8.37499	39.0934	162.063	120.282	23.7342	141.173	-2.58091	0.000144632	0.0110222	-	3L	24440791	24443197	+	2407	-	- && P04146.3 RecName: Full=Copia protein; AltName: Full=Gag-int-pol protein; Contains: RecName: Full=Copia VLP protein; Contains: RecName: Full=Copia protease && PF00665:Integrase core domain	rve
FBgn0015714	1471.9	1492.45	744.393	840.121	1482.18	792.257	0.903682	0.000149277	0.0112821	Cyp6a17	2R	14873953	14875739	+	1727	protein_coding	- && Q9V770.1 RecName: Full=Probable cytochrome P450 6a17; AltName: Full=CYPVIA17 && PF00067:Cytochrome P450	p450
FBgn0039543	2684.18	3721.92	6103.48	6455.42	3203.05	6279.45	-0.971308	0.000152936	0.0114639	CROT	3R	27703379	27706751	-	2899	protein_coding	- && Q9DC50.1 RecName: Full=Peroxisomal carnitine O-octanoyltransferase; Short=COT && PF00755:Choline/Carnitine o-acyltransferase	-
FBgn0261530	157.031	137.977	267.359	806.812	147.504	537.086	-1.86407	0.000161509	0.0120081	nbs	3L	9720414	9723194	-	2599	protein_coding	- && Q9JIL9.2 RecName: Full=Nibrin; AltName: Full=Nijmegen breakage syndrome protein 1 homolog && PF00498:FHA domain|PF00533:BRCA1 C Terminus (BRCT) domain|PF16508:Second BRCT domain on Nijmegen syndrome breakage protein	FHA
FBgn0028872	85.8436	80.4865	21.0591	13.8787	83.165	17.4689	2.25095	0.000169636	0.012478	CG18095	2L	14029262	14031539	-	2036	protein_coding	- && - && PF13855:Leucine rich repeat	-
FBgn0262743	339.187	443.825	826.798	795.71	391.506	811.254	-1.05178	0.000170573	0.012478	Fs(2)Ket	2L	20734609	20750941	+	7157	protein_coding	- && O18388.2 RecName: Full=Importin subunit beta; AltName: Full=Karyopherin subunit beta; AltName: Full=Protein ketel && PF13513:HEAT-like repeat|PF03810:Importin-beta N-terminal domain	-
FBgn0030348	181.109	179.37	67.7554	60.1408	180.239	63.9481	1.49489	0.000171922	0.012478	CG10352	X	11875306	11877168	-	1491	protein_coding	- && Q8GWU0.1 RecName: Full=Phosphoglycolate phosphatase 2 && PF13242:HAD-hyrolase-like|PF13344:Haloacid dehalogenase-like hydrolase	-
FBgn0034480	560.077	624.345	983.368	2438.02	592.211	1710.69	-1.53046	0.000175839	0.0126618	CG16898	2R	20003620	20005003	-	1325	protein_coding	- && - && PF02958:Ecdysteroid kinase	-
FBgn0026602	297.312	234.561	570.427	562.548	265.936	566.487	-1.09019	0.000187023	0.0133619	Ady43A	2R	7243024	7245776	-	2203	protein_coding	- && O29891.1 RecName: Full=Uncharacterized sugar kinase AF_0356 && PF00294:pfkB family carbohydrate kinase	PfkB
FBgn0264994	0	0	11.903	40.7107	0	26.3068	-7.02609	0.000190324	0.0133916	lncRNA:CR44145	2L	11736402	11737541	+	1071	ncRNA	- && - && -	-
FBgn0038740	341.281	328.845	56.768	143.413	335.063	100.09	1.74345	0.000190367	0.0133916	CG4562	3R	19865417	19875678	-	6617	protein_coding	- && P91660.4 RecName: Full=Probable multidrug resistance-associated protein lethal(2)03659; AltName: Full=Wunen region A protein && PF00005:ABC transporter|PF00664:ABC transporter transmembrane region	ABC_membrane
FBgn0015038	316.156	400.133	635.435	1250.93	358.144	943.182	-1.39731	0.000202325	0.0141241	Cyp9b1	2R	7127838	7129808	-	1752	protein_coding	- && Q9V4I0.1 RecName: Full=Cytochrome P450 9b1; AltName: Full=CYPIXB1 && PF00067:Cytochrome P450	p450
FBgn0039131	300.453	324.245	142.836	126.758	312.349	134.797	1.21213	0.000209286	0.0144994	CG12268	3R	23943628	23948424	-	1923	protein_coding	- && A1ZAI5.1 RecName: Full=Putative fatty acyl-CoA reductase CG5065 && PF03015:Male sterility protein|PF07993:Male sterility protein	NAD_binding_4
FBgn0013686	367235	476425	193400	244603	421830	219002	0.945718	0.000217444	0.0149257	mt:lrRNA	mitochondrion_genome	12735	14058	-	1324	rRNA	- && - && -	-
FBgn0052207	683.608	486.368	245.384	278.498	584.988	261.941	1.15966	0.000218829	0.0149257	hpRNA:CR32207	3L	19477329	19478720	-	1133	ncRNA	- && - && -	-
FBgn0001225	1918.92	2611.21	3934.39	5519.08	2265.06	4726.73	-1.06141	0.000220335	0.0149257	Hsp26	3L	9376418	9377427	-	1010	protein_coding	- && P02517.2 RecName: Full=Heat shock protein 26 && PF00011:Hsp20/alpha crystallin family	-
FBgn0015037	994.53	1101.51	1900.81	1859.74	1048.02	1880.28	-0.843416	0.000262269	0.0176357	Cyp4p1	2R	9240041	9242139	+	1680	protein_coding	- && Q9V558.1 RecName: Full=Cytochrome P450 4p1; AltName: Full=CYPIVP1 && PF00067:Cytochrome P450	p450
FBgn0034328	247.062	158.673	790.174	389.528	202.868	589.851	-1.53895	0.000264627	0.0176643	IM23	2R	18382704	18383235	-	468	protein_coding	- && Q9V8F5.2 RecName: Full=Immune-induced peptide 23; Short=DIM-23; Flags: Precursor && PF08194:DIM protein	-
FBgn0015351	84.7967	66.6888	143.751	477.426	75.7428	310.588	-2.03499	0.000267303	0.0177137	CG14906	3R	16649981	16651157	-	1177	protein_coding	- && Q8N3J2.3 RecName: Full=Methyltransferase-like protein 4 && PF05063:MT-A70	-
FBgn0013771	644.874	479.469	1069.44	1190.79	562.172	1130.11	-1.00685	0.000272187	0.0179076	Cyp6a9	2R	14879356	14881372	-	1964	protein_coding	- && Q27594.3 RecName: Full=Cytochrome P450 6a9; AltName: Full=CYPVIA9 && PF00067:Cytochrome P450	p450
FBgn0039325	88.9842	90.8347	21.0591	24.0563	89.9095	22.5577	1.99491	0.000280387	0.0183153	CG10560	3R	25318550	25320101	-	1367	protein_coding	- && - && PF02958:Ecdysteroid kinase	-
FBgn0031010	146.562	67.8386	24.7215	22.2058	107.2	23.4637	2.1933	0.000284908	0.0184786	CG8028	X	19277176	19280349	-	2031	protein_coding	- && - && PF07690:Major Facilitator Superfamily	MFS_1
FBgn0036754	81.6561	70.1382	178.545	234.087	75.8972	206.316	-1.44176	0.000306737	0.0197543	CG5589	3L	17802490	17804715	-	2112	protein_coding	- && Q99PT0.1 RecName: Full=Probable ATP-dependent RNA helicase DDX52; AltName: Full=ATP-dependent RNA helicase ROK1-like; Short=rROK1L; AltName: Full=DEAD box protein 52 && PF00270:DEAD/DEAH box helicase|PF00271:Helicase conserved C-terminal domain	DEAD
FBgn0011660	10.4687	14.9475	68.671	65.6923	12.7081	67.1816	-2.40645	0.000318109	0.0203434	Pms2	2R	15368074	15371520	-	3040	protein_coding	- && F1NQJ3.3 RecName: Full=Mismatch repair endonuclease PMS2; AltName: Full=DNA mismatch repair protein PMS2; AltName: Full=PMS1 protein homolog 2 && PF01119:DNA mismatch repair protein, C-terminal domain|PF08676:MutL C terminal dimerisation domain|PF13589:Histidine kinase-, DNA gyrase B-, and HSP90-like ATPase	-
FBgn0030367	122.484	182.819	22.8903	53.6641	152.652	38.2772	1.99546	0.000323521	0.0204889	Cyp311a1	X	12029754	12031465	-	1523	protein_coding	- && Q9VYQ7.1 RecName: Full=Probable cytochrome P450 311a1; AltName: Full=CYPCCCXIA1 && PF00067:Cytochrome P450	p450
FBgn0033836	134	181.669	43.9494	58.2903	157.835	51.1199	1.62587	0.000324865	0.0204889	CG18278	2R	13408042	13409887	-	1677	protein_coding	- && Q8BFR4.1 RecName: Full=N-acetylglucosamine-6-sulfatase; AltName: Full=Glucosamine-6-sulfatase; Short=G6S; Flags: Precursor && PF00884:Sulfatase	Sulfatase
FBgn0005670	1302.31	1290.08	763.621	594.932	1296.2	679.276	0.932183	0.00034067	0.0213385	Cyp4d1	X	2159145	2162180	-	2285	protein_coding	- && P33269.2 RecName: Full=Cytochrome P450 4d1; AltName: Full=CYPIVD1 && PF00067:Cytochrome P450	p450
FBgn0039102	3759.32	4401.46	2043.65	2451.9	4080.39	2247.77	0.86017	0.00035371	0.021981	SPE	3R	23686255	23688147	+	1267	protein_coding	- && P13582.3 RecName: Full=Serine protease easter; Flags: Precursor && PF12032:Regulatory CLIP domain of proteinases|PF00089:Trypsin	Trypsin
FBgn0000140	8.37499	10.3483	221.578	13.8787	9.36162	117.728	-3.65418	0.000355735	0.021981	asp	3R	24753849	24760513	+	6338	protein_coding	- && Q9VC45.3 RecName: Full=Protein abnormal spindle && PF15780:Abnormal spindle-like microcephaly-assoc'd, ASPM-SPD-2-Hydin	-
FBgn0016684	356.984	169.022	94.3081	70.3185	263.003	82.3133	1.67675	0.000361946	0.0222147	NaPi-T	2R	14842720	14845874	-	2660	protein_coding	- && Q9V7S5.1 RecName: Full=Putative inorganic phosphate cotransporter && PF07690:Major Facilitator Superfamily	MFS_1
FBgn0086912	206.234	137.977	328.705	637.493	172.105	483.099	-1.48798	0.000368996	0.0224965	mbm	2L	271912	273715	-	1756	protein_coding	- && Q9VPM5.1 RecName: Full=Protein mushroom body miniature && -	-
FBgn0017448	147.609	72.4378	30.2152	19.4301	110.023	24.8227	2.14918	0.000375556	0.0227447	CG2187	3R	31755356	31758637	-	2580	protein_coding	- && Q7T384.1 RecName: Full=Sodium-coupled monocarboxylate transporter 2; AltName: Full=Electroneutral sodium monocarboxylate cotransporter; Short=zSMCTn; AltName: Full=Low-affinity sodium-lactate cotransporter; AltName: Full=Solute carrier family 5 member 12; Short=zSLC5A12 && PF00474:Sodium:solute symporter family	-
FBgn0010019	1.37775e+06	1.45053e+06	689826	891352	1.41414e+06	790589	0.838923	0.000385427	0.023066	Cyp4g1	X	467057	469335	-	2279	protein_coding	- && Q9V3S0.1 RecName: Full=Cytochrome P450 4g1; AltName: Full=CYPIVG1 && PF00067:Cytochrome P450	p450
FBgn0015558	310.921	576.053	130.017	192.451	443.487	161.234	1.45921	0.000386016	0.023066	tty	X	21328613	21339676	-	7616	protein_coding	- && Q9U6L4.1 RecName: Full=Protein tweety; Short=Dttyh1 && PF04906:Tweety	-
FBgn0010621	1252.06	1317.68	2070.2	2797.01	1284.87	2433.61	-0.921506	0.000390631	0.023066	CCT5	2R	12174802	12177516	+	1981	protein_coding	- && P48643.1 RecName: Full=T-complex protein 1 subunit epsilon; Short=TCP-1-epsilon; AltName: Full=CCT-epsilon >Q4R6V2.1 RecName: Full=T-complex protein 1 subunit epsilon; Short=TCP-1-epsilon; AltName: Full=CCT-epsilon && PF00118:TCP-1/cpn60 chaperonin family	-
FBgn0053494	1052.11	1568.34	2207.54	4101.6	1310.22	3154.57	-1.2678	0.000390949	0.023066	CG33494	3R	25493481	25495161	-	849	protein_coding	- && - && -	-
FBgn0039681	217.75	146.025	64.0929	62.9166	181.888	63.5047	1.51905	0.000400901	0.0235015	CG7582	3R	29680241	29682278	-	1232	protein_coding	- && Q3T0W0.1 RecName: Full=Lysoplasmalogenase; AltName: Full=Transmembrane protein 86B && PF07947:YhhN-like protein	YhhN
FBgn0032929	7.32811	8.04865	124.523	23.1311	7.68838	73.8272	-3.26453	0.000426465	0.0248409	Mcm10	2L	21179933	21182812	+	2820	protein_coding	- && Q9VIE6.2 RecName: Full=Protein MCM10 homolog; AltName: Full=Sensitized chromosome inheritance modifier 19 && PF09329:Primase zinc finger|PF09332:Mcm10 replication factor	-
FBgn0039313	70.1405	73.5876	15.5654	16.6544	71.8641	16.1099	2.15724	0.000439829	0.0254572	CG11892	3R	25281548	25283237	+	1607	protein_coding	- && - && PF02958:Ecdysteroid kinase	-
FBgn0037975	0	0	15.5654	25.9068	0	20.7361	-6.68289	0.000446462	0.0256786	CG3397	3R	11983098	11984541	-	1187	protein_coding	- && P80874.2 RecName: Full=General stress protein 69; Short=GSP69; AltName: Full=AKR11B && PF00248:Aldo/keto reductase family	Aldo_ket_red
FBgn0002542	49.203	72.4378	202.35	153.59	60.8204	177.97	-1.55139	0.000457	0.0261204	lds	3R	7920431	7924491	+	3543	protein_coding	- && P34739.2 RecName: Full=Transcription termination factor 2; AltName: Full=Protein lodestar; AltName: Full=RNA polymerase II termination factor; AltName: Full=Transcription release factor 2 && PF00271:Helicase conserved C-terminal domain|PF00176:SNF2 family N-terminal domain	SNF2_N
FBgn0034136	56.5312	51.7413	8.24052	10.1777	54.1362	9.2091	2.55601	0.000466111	0.0263935	DAT	2R	16558567	16565238	-	3040	protein_coding	- && Q7K4Y6.1 RecName: Full=Sodium-dependent dopamine transporter; AltName: Full=Protein fumin && PF00209:Sodium:neurotransmitter symporter family	SNF
FBgn0021979	4986.26	6457.31	9679.86	11106.6	5721.79	10393.2	-0.861164	0.000467549	0.0263935	l(2)k09913	2R	23067196	23071875	+	2411	protein_coding	- && - && PF05705:Eukaryotic protein of unknown function (DUF829)	-
FBgn0004106	4.18749	4.59923	162.063	5.55146	4.39336	83.8075	-4.25475	0.000514421	0.0288613	Cdk1	2L	10384739	10386262	-	1082	protein_coding	- && P23572.1 RecName: Full=Cyclin-dependent kinase 1; Short=CDK1; AltName: Full=Cell division control protein 2 homolog; AltName: Full=Cell division protein kinase 1; AltName: Full=p34 protein kinase && PF00069:Protein kinase domain	Pkinase
FBgn0038466	681.515	572.604	183.123	336.789	627.059	259.956	1.27062	0.000524876	0.0292682	CG8907	3R	17008269	17012533	+	2467	protein_coding	- && Q8TE68.3 RecName: Full=Epidermal growth factor receptor kinase substrate 8-like protein 1; Short=EPS8-like protein 1; AltName: Full=Epidermal growth factor receptor pathway substrate 8-related protein 1; Short=EPS8-related protein 1 && PF08416:Phosphotyrosine-binding domain|PF00018:SH3 domain	SH3_1
FBgn0002778	268	389.784	789.258	624.539	328.892	706.899	-1.10475	0.000536448	0.0297322	mnd	3L	14985100	14991667	+	2546	protein_coding	- && Q7YQK4.1 RecName: Full=Large neutral amino acids transporter small subunit 1; AltName: Full=4F2 light chain; Short=4F2 LC; Short=4F2LC; AltName: Full=L-type amino acid transporter 1; AltName: Full=LAT1 light chain; AltName: Full=Solute carrier family 7 member 5 && PF13520:Amino acid permease	-
FBgn0052694	170.64	126.479	502.671	278.498	148.56	390.585	-1.39375	0.000569405	0.0313687	CG32694	X	9989690	10006882	+	5996	protein_coding	- && - && -	-
FBgn0005640	547.515	453.024	1006.26	882.682	500.269	944.47	-0.916413	0.000590786	0.0320011	Eip63E	3L	3515751	3610521	+	6544	protein_coding	- && Q6DJM7.1 RecName: Full=Cyclin-dependent kinase 14; AltName: Full=Cell division protein kinase 14 && PF00069:Protein kinase domain	Pkinase
FBgn0040099	2699.89	2877.97	1697.55	1580.32	2788.93	1638.93	0.766912	0.000591812	0.0320011	lectin-28C	2L	7857077	7860120	+	3044	protein_coding	- && - && PF00059:Lectin C-type domain|PF03103:Domain of unknown function (DUF243)	Lectin_C
FBgn0020385	98390.4	75430.8	50323.9	48276.4	86910.6	49300.2	0.817942	0.000596839	0.0320011	pug	3R	10696534	10703316	+	3481	protein_coding	- && O96553.4 RecName: Full=C-1-tetrahydrofolate synthase, cytoplasmic; Short=C1-THF synthase; Includes: RecName: Full=Methylenetetrahydrofolate dehydrogenase; Includes: RecName: Full=Methenyltetrahydrofolate cyclohydrolase; Includes: RecName: Full=Formyltetrahydrofolate synthetase && PF01268:Formate--tetrahydrofolate ligase|PF02882:Tetrahydrofolate dehydrogenase/cyclohydrolase, NAD(P)-binding do…	-
FBgn0046706	54.4374	75.8872	234.397	148.039	65.1623	191.218	-1.55499	0.000598235	0.0320011	Haspin	2R	4014111	4049342	+	1815	protein_coding	- && P83103.1 RecName: Full=Putative serine/threonine-protein kinase haspin homolog && PF12330:Domain of unknown function (DUF3635)	-
FBgn0035162	518.202	551.907	901.879	1083.46	535.055	992.669	-0.89174	0.000598381	0.0320011	Sf3b3	3L	826720	833385	-	4329	protein_coding	- && Q15393.4 RecName: Full=Splicing factor 3B subunit 3; AltName: Full=Pre-mRNA-splicing factor SF3b 130 kDa subunit; Short=SF3b130; AltName: Full=STAF130; AltName: Full=Spliceosome-associated protein 130; Short=SAP 130 >A0JN52.1 RecName: Full=Splicing factor 3B subunit 3; AltName: Full=Pre-mRNA-splicing factor SF3b 130 kDa subunit; Short=SF3b130; AltName: Full=Spliceosome-associated protein 130…	-
FBgn0024491	88.9842	123.029	451.397	2653.6	106.007	1552.5	-3.87254	0.000617081	0.0328093	Bin1	3R	16186156	16189564	-	3336	protein_coding	- && Q9VEX9.1 RecName: Full=Histone deacetylase complex subunit SAP18; AltName: Full=18 kDa Sin3-associated polypeptide; AltName: Full=Bicoid-interacting protein 1; AltName: Full=dSAP18 && PF06487:Sin3 associated polypeptide p18 (SAP18)	-
FBgn0032906	33.4999	22.9961	126.355	84.1972	28.248	105.276	-1.89507	0.000650235	0.0343576	RPA2	2L	20924975	20926147	-	963	protein_coding	- && Q5RC43.1 RecName: Full=Replication protein A 32 kDa subunit; Short=RP-A p32; AltName: Full=Replication factor A protein 2; Short=RF-A protein 2 && PF08784:Replication protein A C terminal	-
FBgn0040232	1.04687	0	75.0803	8.32719	0.523437	41.7037	-6.25613	0.000653715	0.0343576	cmet	2L	11261026	11269002	-	7008	protein_coding	- && Q9S7P3.1 RecName: Full=Kinesin-like protein KIN-7N && PF00225:Kinesin motor domain	Kinesin
FBgn0052203	8.37499	29.895	0	0	19.135	0	6.81816	0.000668297	0.0347707	Spn75F	3L	19128450	19129665	-	1149	protein_coding	- && Q8K3K4.1 RecName: Full=Serpin B10; AltName: Full=TGF-beta-repressible serine proteinase inhibitor; Short=Trespin; AltName: Full=Transforming growth factor beta repressible serpin && PF00079:Serpin (serine protease inhibitor)	Serpin
FBgn0034095	174.828	113.831	42.1182	51.8136	144.329	46.9659	1.62086	0.000669179	0.0347707	CG15701	2R	16230198	16234087	+	3367	protein_coding	- && - && -	-
FBgn0037810	51.2968	57.4903	202.35	123.983	54.3936	163.167	-1.58564	0.000677482	0.0350032	sle	3R	10333115	10338265	+	4875	protein_coding	- && Q8INM3.1 RecName: Full=Protein slender lobes && -	-
FBgn0034279	2.09375	0	29.2996	31.4583	1.04687	30.3789	-4.81253	0.000681937	0.0350355	CG18635	2R	17767808	17769989	-	2073	protein_coding	- && - && PF09815:XK-related protein	-
FBgn0038577	3144.81	3064.23	1535.48	1960.59	3104.52	1748.04	0.828662	0.000687397	0.0350577	CG12321	3R	18187805	18188707	-	903	protein_coding	- && - && PF09754:PAC2 family	-
FBgn0033904	219.843	516.263	86.9832	147.114	368.053	117.048	1.65221	0.00069316	0.0350577	CG18327	2R	14166982	14168233	+	1064	protein_coding	- && A3KPP4.1 RecName: Full=Solute carrier family 25 member 35 && PF00153:Mitochondrial carrier protein	Mito_carr
FBgn0033669	1936.72	2123.69	1106.06	1237.05	2030.2	1171.56	0.793147	0.00069387	0.0350577	PI31	2R	11967343	11970115	-	1404	protein_coding	- && Q9V637.1 RecName: Full=Proteasome inhibitor PI31 subunit && PF11566:PI31 proteasome regulator N-terminal	-
FBgn0029733	2.09375	3.44942	139.173	2.77573	2.77158	70.9744	-4.68456	0.00071414	0.0357848	CG6927	X	4906900	4908821	+	1868	protein_coding	- && O75311.2 RecName: Full=Glycine receptor subunit alpha-3; Flags: Precursor && PF02931:Neurotransmitter-gated ion-channel ligand binding domain|PF02932:Neurotransmitter-gated ion-channel transmembrane region	Neur_chan_LBD
novel.78	369.546	427.728	1073.1	655.072	398.637	864.085	-1.11639	0.000717181	0.0357848	-	X	23531341	23535865	-	922	-	- && - && -	-
FBgn0259937	1015.47	899.149	1517.17	2172.47	957.308	1844.82	-0.946284	0.000722646	0.0357848	Nop60B	2R	24174877	24186343	+	3412	protein_coding	- && O44081.1 RecName: Full=H/ACA ribonucleoprotein complex subunit 4; AltName: Full=Nucleolar protein AT band 60B; AltName: Full=Protein minifly && PF01509:TruB family pseudouridylate synthase (N terminal domain)|PF16198:tRNA pseudouridylate synthase B C-terminal domain|PF01472:PUA domain|PF08068:DKCLD (NUC011) domain	-
FBgn0033395	23.0312	17.2471	58.5992	124.908	20.1392	91.7536	-2.18524	0.000723913	0.0357848	Cyp4p2	2R	9237512	9239831	+	1777	protein_coding	- && Q9V557.1 RecName: Full=Probable cytochrome P450 4p2; AltName: Full=CYPIVP2 && PF00067:Cytochrome P450	p450
FBgn0035392	965.217	789.917	399.207	505.183	877.567	452.195	0.956831	0.00073246	0.0360126	CG1271	3L	3052514	3054906	+	2057	protein_coding	- && Q08D86.1 RecName: Full=Putative glycerol kinase 5; Short=GK 5; Short=Glycerokinase 5; AltName: Full=ATP:glycerol 3-phosphotransferase 5 && PF02782:FGGY family of carbohydrate kinases, C-terminal domain|PF00370:FGGY family of carbohydrate kinases, N-terminal domain	FGGY_N
FBgn0260991	15.7031	31.0448	224.325	49.0379	23.3739	136.682	-2.55152	0.000746612	0.0365121	Incenp	2R	7278467	7281795	+	2838	protein_coding	- && - && -	-
FBgn0284253	1253.11	1431.51	2396.16	2217.81	1342.31	2306.98	-0.781437	0.000793831	0.0385244	LeuRS	2L	3510328	3514656	-	3934	protein_coding	- && Q8BMJ2.2 RecName: Full=Leucine--tRNA ligase, cytoplasmic; AltName: Full=Leucyl-tRNA synthetase; Short=LeuRS && PF09334:tRNA synthetases class I (M)|PF08264:Anticodon-binding domain of tRNA|PF00133:tRNA synthetases class I (I, L, M and V)	-
FBgn0259152	354.89	382.886	558.524	1434.13	368.888	996.326	-1.43349	0.000796185	0.0385244	Clbn	3R	25127502	25131155	+	3386	protein_coding	- && Q9VBX1.2 RecName: Full=Nuclear export mediator factor NEMF homolog; AltName: Full=Protein Caliban && PF05670:Domain of unknown function (DUF814)|PF11923:Domain of unknown function (DUF3441)|PF05833:Fibronectin-binding protein A N-terminus (FbpA)	-
FBgn0031563	1198.67	1453.36	759.959	719.84	1326.01	739.899	0.841507	0.000812274	0.039096	CG10031	2L	3698451	3699092	-	577	protein_coding	- && P26228.1 RecName: Full=Protease inhibitor; AltName: Full=SBPI && PF00014:Kunitz/Bovine pancreatic trypsin inhibitor domain	Kunitz_BPTI
FBgn0039759	6.28124	1.14981	50.3587	31.4583	3.71552	40.9085	-3.44003	0.000878276	0.0411987	CG9733	3R	30243978	30246703	-	1467	protein_coding	- && Q9V3Z2.1 RecName: Full=Serine protease 7; AltName: Full=Melanization protease 2; Flags: Precursor && PF00089:Trypsin|PF12032:Regulatory CLIP domain of proteinases	Trypsin
FBgn0052499	54.4374	59.7899	4.57806	13.8787	57.1137	9.22836	2.63057	0.00088484	0.0411987	Cda4	X	22583634	22632710	-	1934	protein_coding	- && - && PF01607:Chitin binding Peritrophin-A domain	CBM_14
FBgn0024227	3.14062	0	65.9241	12.9534	1.57031	39.4388	-4.61442	0.000886788	0.0411987	aurB	2L	10856797	10858094	-	1183	protein_coding	- && Q9VKN7.1 RecName: Full=Aurora kinase B; AltName: Full=IPL1/Aurora-like protein kinase; AltName: Full=Serine/threonine-protein kinase Ial; AltName: Full=Serine/threonine-protein kinase aurora-B && PF00069:Protein kinase domain	Pkinase
FBgn0087035	5015.57	4763.65	7294.69	11601.6	4889.61	9448.16	-0.9503	0.000889161	0.0411987	AGO2	3L	15554113	15561042	+	4144	protein_coding	- && Q9VUQ5.3 RecName: Full=Protein argonaute-2 && PF02170:PAZ domain|PF16486:N-terminal domain of argonaute|PF02171:Piwi domain|PF16487:Mid domain of argonaute|PF08699:Argonaute linker 1 domain|PF16488:Argonaute linker 2 domain	Piwi
novel.19	55.4843	87.3853	164.81	230.386	71.4348	197.598	-1.47014	0.000894575	0.0411987	-	2R	6267489	6269266	+	1714	-	- && - && -	-
FBgn0028400	102.594	128.778	40.287	12.0282	115.686	26.1576	2.14385	0.000896362	0.0411987	Syt4	3R	7266065	7270809	+	3103	protein_coding	- && Q9H2B2.1 RecName: Full=Synaptotagmin-4; AltName: Full=Synaptotagmin IV; Short=SytIV && PF00168:C2 domain	C2
FBgn0040211	2085.37	2468.63	1159.17	1402.67	2277	1280.92	0.829883	0.000897777	0.0411987	hgo	2L	11136393	11138565	+	1445	protein_coding	- && Q9VKJ0.3 RecName: Full=Homogentisate 1,2-dioxygenase; AltName: Full=Homogentisate oxygenase; AltName: Full=Homogentisic acid oxidase; AltName: Full=Homogentisicase && PF04209:homogentisate 1,2-dioxygenase	-
FBgn0039776	3331.15	2639.96	1776.29	1614.55	2985.55	1695.42	0.816448	0.000898344	0.0411987	PH4alphaEFB	3R	30466050	30485799	+	2248	protein_coding	- && Q20065.1 RecName: Full=Prolyl 4-hydroxylase subunit alpha-2; Short=4-PH alpha-2; AltName: Full=Procollagen-proline,2-oxoglutarate-4-dioxygenase subunit alpha-2; Flags: Precursor && PF08336:Prolyl 4-Hydroxylase alpha-subunit, N-terminal region|PF03171:2OG-Fe(II) oxygenase superfamily	2OG-FeII_Oxy
FBgn0039316	68.0468	55.1907	186.785	10541.3	61.6187	5364.04	-6.44372	0.000900436	0.0411987	CG11893	3R	25289889	25291366	+	1415	protein_coding	- && - && PF02958:Ecdysteroid kinase	-
FBgn0029172	50740.9	79027.4	26545.4	37584.3	64884.1	32064.9	1.01687	0.000901011	0.0411987	Fad2	3L	11023535	11024846	+	1312	protein_coding	- && O44390.2 RecName: Full=Acyl-CoA Delta(11) desaturase; AltName: Full=Acyl-CoA Delta-11 desaturase; Short=Delta(11)-desaturase && PF00487:Fatty acid desaturase	-
FBgn0039307	131.906	40.2432	13.7342	17.5796	86.0746	15.6569	2.46087	0.000908454	0.0413324	CR13656	3R	25268661	25269965	+	1248	pseudogene	- && - && PF02958:Ecdysteroid kinase	-
FBgn0267611	1.04687	2.29961	15.5654	49.9632	1.67324	32.7643	-4.30604	0.000957636	0.0432575	lncRNA:CR45949	2L	9948908	9951122	+	2215	ncRNA	- && - && -	-
FBgn0036186	29.3125	17.2471	60.4305	151.74	23.2798	106.085	-2.18434	0.000964968	0.0432575	CG6071	3L	11642906	11646033	-	2926	protein_coding	- && Q6Q4G3.4 RecName: Full=Aminopeptidase Q; Short=AP-Q; Short=APQ; AltName: Full=CHL2 antigen; AltName: Full=Laeverin && PF01433:Peptidase family M1|PF11838:ERAP1-like C-terminal domain	-
FBgn0033196	38.7343	54.0409	126.355	142.488	46.3876	134.421	-1.53726	0.000971972	0.0432575	CG1358	2R	7595265	7620711	-	4058	protein_coding	- && P60815.1 RecName: Full=Feline leukemia virus subgroup C receptor-related protein 2; AltName: Full=Calcium-chelate transporter; Short=CCT && PF07690:Major Facilitator Superfamily	MFS_1
FBgn0260243	163.312	173.621	336.946	348.817	168.467	342.881	-1.02552	0.000973402	0.0432575	E(var)3-9	3R	8990645	8992949	-	2136	protein_coding	- && - && PF07776:Zinc-finger associated domain (zf-AD)	zf-AD
FBgn0031737	286.843	433.477	145.582	171.17	360.16	158.376	1.18465	0.000978661	0.0432575	obst-E	2L	5762553	5766142	-	1810	protein_coding	- && - && PF01607:Chitin binding Peritrophin-A domain	CBM_14
FBgn0035665	3.14062	8.04865	32.0465	59.2156	5.59463	45.631	-3.0396	0.000979945	0.0432575	Jon65Aiii	3L	6050757	6051690	+	875	protein_coding	- && P17205.2 RecName: Full=Serine proteases 1/2; AltName: Full=Protein Jonah 99Cii/99Ciii; Flags: Precursor && PF00089:Trypsin	Trypsin
FBgn0010803	222.984	273.654	413.857	747.597	248.319	580.727	-1.22606	0.000983878	0.0432575	TrpRS	3R	9265027	9266904	-	1683	protein_coding	- && P17248.3 RecName: Full=Tryptophan--tRNA ligase, cytoplasmic; AltName: Full=Tryptophanyl-tRNA synthetase; Short=TrpRS; Contains: RecName: Full=T1-TrpRS; Contains: RecName: Full=T2-TrpRS && PF00579:tRNA synthetases class I (W and Y)	-
FBgn0262945	0	0	8.24052	30.533	0	19.3868	-6.58571	0.000995053	0.0435395	lncRNA:CR43264	X	5831898	5832215	-	318	ncRNA	- && - && -	-
FBgn0029831	31721.3	25219.9	53123.9	45330.5	28470.6	49227.2	-0.789973	0.00102825	0.0445205	CG5966	X	5988791	5992640	+	3751	protein_coding	- && P27657.1 RecName: Full=Pancreatic triacylglycerol lipase; Short=PL; Short=Pancreatic lipase; Flags: Precursor && PF00151:Lipase	Lipase
FBgn0262983	0	1.14981	28.384	28.6826	0.574903	28.5333	-5.69443	0.00103061	0.0445205	CG43291	3R	14234984	14244677	-	2154	protein_coding	- && - && PF16030:Serine protease gd N-terminus	-
FBgn0039820	49.203	86.2355	16.481	12.0282	67.7193	14.2546	2.24634	0.00103382	0.0445205	CG15554	3R	31126149	31127335	+	801	protein_coding	- && - && -	-
FBgn0000079	1134.81	526.611	1817.49	2037.39	830.711	1927.44	-1.21377	0.00103759	0.0445205	Amy-p	2R	17118636	17120303	-	1668	protein_coding	- && P81641.3 RecName: Full=Alpha-amylase B; AltName: Full=1,4-alpha-D-glucan glucanohydrolase; Flags: Precursor && PF02806:Alpha amylase, C-terminal all-beta domain|PF00128:Alpha amylase, catalytic domain	-
FBgn0015245	4098.51	5677.74	7621.56	12216.9	4888.13	9919.24	-1.021	0.00104181	0.0445205	Hsp60A	X	11108482	11112308	+	2480	protein_coding	- && O02649.3 RecName: Full=60 kDa heat shock protein, mitochondrial; AltName: Full=60 kDa chaperonin; AltName: Full=CPN60; AltName: Full=Heat shock protein 60; Short=HSP-60; AltName: Full=Hsp60; AltName: Full=Mitochondrial matrix protein P1; Flags: Precursor && PF00118:TCP-1/cpn60 chaperonin family	-
FBgn0261805	816.561	701.382	447.735	310.882	758.972	379.308	1.00077	0.00105071	0.0445252	CG42751	2L	11853430	11853925	+	422	protein_coding	- && - && -	-
FBgn0035147	17134.2	24306.9	11653.9	11461.9	20720.5	11557.9	0.84216	0.00105166	0.0445252	Gale	3L	648555	651311	+	1757	protein_coding	- && Q9W0P5.1 RecName: Full=UDP-glucose 4-epimerase; AltName: Full=Galactowaldenase; AltName: Full=UDP-N-acetylgalactosamine 4-epimerase; Short=UDP-GalNAc 4-epimerase; AltName: Full=UDP-N-acetylglucosamine 4-epimerase; Short=UDP-GlcNAc 4-epimerase; AltName: Full=UDP-galactose 4-epimerase && PF16363:GDP-mannose 4,6 dehydratase	-
FBgn0000565	253.343	318.496	564.933	540.342	285.92	552.638	-0.951441	0.00105921	0.0446381	Eip71CD	3L	15511052	15513202	+	1354	protein_coding	- && P08761.2 RecName: Full=Peptide methionine sulfoxide reductase; AltName: Full=Ecdysone-induced protein 28/29 kDa; AltName: Full=Methionine-S-sulfoxide reductase; AltName: Full=Peptide-methionine (S)-S-oxide reductase && PF01625:Peptide methionine sulfoxide reductase	PMSR
FBgn0010041	28.2656	32.1946	89.7301	108.254	30.2301	98.9918	-1.71237	0.00107406	0.044946	GstD5	3R	12375733	12376572	+	840	protein_coding	- && Q9VG95.2 RecName: Full=Glutathione S-transferase D5 && PF00043:Glutathione S-transferase, C-terminal domain	GST_C
FBgn0036334	832.264	1038.28	1661.84	1629.35	935.27	1645.6	-0.815447	0.00107635	0.044946	CG11267	3L	13016050	13016903	+	594	protein_coding	- && Q5DC69.2 RecName: Full=10 kDa heat shock protein, mitochondrial; Short=Hsp10; AltName: Full=10 kDa chaperonin; AltName: Full=Chaperonin 10; Short=CPN10 && PF00166:Chaperonin 10 Kd subunit	-
FBgn0031428	2957.42	3643.74	2056.47	1655.26	3300.58	1855.86	0.830539	0.00111072	0.0461704	CG9886	2L	2420830	2424647	+	3762	protein_coding	- && Q9VQC4.1 RecName: Full=Glycerate kinase && PF13660:Domain of unknown function (DUF4147)|PF05161:MOFRL family	-
FBgn0003701	6.28124	5.74903	97.9706	17.5796	6.01514	57.7751	-3.26302	0.00111965	0.0463311	thr	2R	17861273	17865963	-	4578	protein_coding	- && P42286.2 RecName: Full=Protein three rows && -	-
FBgn0085384	75.3749	73.5876	22.8903	13.8787	74.4813	18.3845	2.018	0.00112878	0.0464717	CG34355	3R	23803859	23859167	+	5589	protein_coding	- && Q9GPJ1.3 RecName: Full=Protein Skeletor, isoforms D/E; Flags: Precursor && PF03351:DOMON domain|PF10517:Electron transfer DM13	-
FBgn0262108	60.7187	59.7899	11.903	14.8039	60.2543	13.3534	2.17414	0.00113321	0.0464717	lncRNA:CR42861	X	13744928	13745476	+	549	ncRNA	- && - && -	-
FBgn0038608	2.09375	2.29961	79.6583	7.40195	2.19668	43.5301	-4.31029	0.00114649	0.0468065	WRNexo	3R	18364244	18366162	-	1498	protein_coding	- && Q9VE86.2 RecName: Full=Werner Syndrome-like exonuclease; Short=DmWRNexo; AltName: Full=3'-5' exonuclease && PF01612:3'-5' exonuclease	3_5_exonuc
FBgn0038455	235.547	258.706	361.667	1066.81	247.126	714.236	-1.53124	0.00115339	0.0468791	CG14907	3R	16651217	16652319	-	1103	protein_coding	- && - && -	-
FBgn0031800	131.906	196.617	364.414	351.593	164.261	358.003	-1.12547	0.00119863	0.0485021	CG9497	2L	6346430	6348427	-	1774	protein_coding	- && - && PF02958:Ecdysteroid kinase	-
FBgn0264747	0	0	43.0338	2.77573	0	22.9048	-6.82672	0.00121713	0.0490338	CG44005	3L	18070300	18072123	-	1406	protein_coding	- && - && -	-
FBgn0033520	221.937	154.074	84.2364	49.0379	188.006	66.6371	1.49684	0.00125531	0.0503499	Prx2540-1	2R	10424436	10425471	+	848	protein_coding	- && Q5ZJF4.3 RecName: Full=Peroxiredoxin-6 && PF10417:C-terminal domain of 1-Cys peroxiredoxin|PF00578:AhpC/TSA family	-
FBgn0033301	3.14062	1.14981	23.8059	37.0097	2.14521	30.4078	-3.80782	0.00129621	0.0516377	CG12780	2R	8551859	8552290	-	432	protein_coding	- && Q9NHA8.2 RecName: Full=Gram-negative bacteria-binding protein 3; Flags: Precursor && PF15886:Carbohydrate binding domain (family 32)	-
FBgn0032054	898.217	829.011	464.216	513.51	863.614	488.863	0.82109	0.00129871	0.0516377	Uba4	2L	8517411	8519176	+	1710	protein_coding	- && Q9VLJ8.1 RecName: Full=Adenylyltransferase and sulfurtransferase MOCS3; AltName: Full=Molybdenum cofactor synthesis protein 3; Includes: RecName: Full=Molybdopterin-synthase adenylyltransferase; AltName: Full=Adenylyltransferase MOCS3; AltName: Full=Sulfur carrier protein MOCS2A adenylyltransferase; Includes: RecName: Full=Molybdopterin-synthase sulfurtransferase; AltName: Full=Sulfur carrie…	Rhodanese
FBgn0260440	61.7655	26.4456	5.49368	6.47671	44.1055	5.98519	2.88378	0.00131165	0.0519264	spdo	3R	30476684	30478849	+	2087	protein_coding	- && - && -	-
novel.42	9.42186	6.89884	33.8777	68.468	8.16035	51.1729	-2.64487	0.0013584	0.0535456	-	3L	25175543	25181680	+	1831	-	- && P04146.3 RecName: Full=Copia protein; AltName: Full=Gag-int-pol protein; Contains: RecName: Full=Copia VLP protein; Contains: RecName: Full=Copia protease && -	-
FBgn0053468	6.28124	2.29961	23.8059	370.097	4.29043	196.952	-5.51539	0.00137341	0.053905	CG33468	2R	14606307	14606980	-	607	protein_coding	- && - && -	-
FBgn0083956	1665.58	2376.65	999.849	1175.06	2021.11	1087.45	0.894036	0.00142551	0.0554654	CG34120	X	21123634	21140951	+	7569	protein_coding	- && Q9BZC7.3 RecName: Full=ATP-binding cassette sub-family A member 2; AltName: Full=ATP-binding cassette transporter 2; Short=ATP-binding cassette 2 && PF12698:ABC-2 family transporter protein|PF00005:ABC transporter	ABC_tran
FBgn0037071	262.765	282.852	399.207	1062.18	272.809	730.693	-1.42143	0.00142749	0.0554654	CG7632	3L	21304697	21306197	+	1442	protein_coding	- && O18391.1 RecName: Full=Probable serine hydrolase; AltName: Full=Kraken protein && PF12697:Alpha/beta hydrolase family	-
FBgn0051036	122.484	93.1343	29.2996	39.7855	107.809	34.5425	1.64304	0.00143136	0.0554654	CG31036	3R	29908107	29912892	+	3322	protein_coding	- && - && -	-
FBgn0039682	15611	21619.8	7927.38	11598.9	18615.4	9763.12	0.93107	0.00145453	0.0561253	Obp99c	3R	29685736	29689311	-	669	protein_coding	- && - && PF01395:PBP/GOBP family	-
FBgn0040294	212.515	210.415	328.705	730.017	211.465	529.361	-1.32375	0.00150855	0.0577351	POSH	2R	17568732	17572322	+	3169	protein_coding	- && Q8TEJ3.2 RecName: Full=SH3 domain-containing RING finger protein 3; AltName: Full=Plenty of SH3s 2; AltName: Full=SH3 multiple domains protein 4 && PF00018:SH3 domain|PF00097:Zinc finger, C3HC4 type (RING finger)|PF14604:Variant SH3 domain	SH3_1
FBgn0003116	1080.37	1716.66	669.313	754.074	1398.52	711.693	0.974314	0.00150888	0.0577351	pn	X	2181211	2182916	+	1638	protein_coding	- && Q86TP1.2 RecName: Full=Protein prune homolog; Short=hPrune; AltName: Full=Drosophila-related expressed sequence 17; Short=DRES-17; Short=DRES17; AltName: Full=HTcD37 && PF02833:DHHA2 domain|PF01368:DHH family	-
FBgn0038865	7336.49	5729.49	4014.96	3662.11	6532.99	3838.54	0.767232	0.00152545	0.0580403	cDIP	3R	21159238	21161092	-	1855	protein_coding	- && Q9NZU1.3 RecName: Full=Leucine-rich repeat transmembrane protein FLRT1; AltName: Full=Fibronectin-like domain-containing leucine-rich transmembrane protein 1; Flags: Precursor && PF13855:Leucine rich repeat	-
FBgn0085313	137.14	52.8911	23.8059	21.2806	95.0158	22.5433	2.07719	0.00153546	0.0580403	CG34284	3R	18902338	18902933	-	520	protein_coding	- && - && -	-
FBgn0286075	594.624	408.181	738.9	1836.61	501.403	1287.75	-1.36048	0.00154166	0.0580403	DNAlig3	3R	12399011	12401839	-	2604	protein_coding	- && P49916.2 RecName: Full=DNA ligase 3; AltName: Full=DNA ligase III; AltName: Full=Polydeoxyribonucleotide synthase [ATP] 3; Flags: Precursor && PF01068:ATP dependent DNA ligase domain|PF04679:ATP dependent DNA ligase C terminal region|PF04675:DNA ligase N terminus	DNA_ligase_A_M
FBgn0034440	55.4843	66.6888	10.9874	16.6544	61.0865	13.8209	2.14386	0.00154543	0.0580403	CG10073	2R	19380543	19384965	+	2824	protein_coding	- && Q3UVK0.2 RecName: Full=Endoplasmic reticulum metallopeptidase 1; AltName: Full=Felix-ina && PF04389:Peptidase family M28	-
FBgn0033215	92.1249	120.73	203.266	309.957	106.427	256.611	-1.2708	0.00154859	0.0580403	Dgat2	2R	7712578	7714182	+	1305	protein_coding	- && Q54GC1.1 RecName: Full=Diacylglycerol O-acyltransferase 2; AltName: Full=Diglyceride acyltransferase 2 && PF03982:Diacylglycerol acyltransferase	-
FBgn0263998	544.374	510.514	818.558	1189.86	527.444	1004.21	-0.928834	0.00158434	0.0591381	Ack-like	2R	13142834	13152677	-	7757	protein_coding	- && Q9I7F7.3 RecName: Full=Tyrosine-protein kinase PR2 && PF07714:Protein tyrosine kinase	Pkinase_Tyr
FBgn0039827	1033.26	1145.21	639.098	637.493	1089.24	638.295	0.770896	0.00159719	0.0593752	CG1544	3R	31196916	31203722	+	2932	protein_coding	- && Q9VA02.2 RecName: Full=Probable 2-oxoglutarate dehydrogenase E1 component DHKTD1 homolog, mitochondrial; Flags: Precursor && PF16870:2-oxoglutarate dehydrogenase C-terminal|PF00676:Dehydrogenase E1 component|PF02779:Transketolase, pyrimidine binding domain	-
FBgn0259710	3.14062	3.44942	10.0717	79.571	3.29502	44.8213	-3.76685	0.00161844	0.0594809	CG42364	2R	21665940	21666579	+	640	protein_coding	- && - && -	-
FBgn0051321	190.531	327.695	102.549	109.179	259.113	105.864	1.29043	0.0016196	0.0594809	CG31321	3R	14310362	14314412	+	2198	protein_coding	- && - && PF07690:Major Facilitator Superfamily	MFS_1
FBgn0267511	41.8749	22.9961	179.46	74.0195	32.4355	126.74	-1.96303	0.00162148	0.0594809	28SrRNA-Psi:CR45851	rDNA	35941	38740	+	1721	pseudogene	- && - && -	-
FBgn0284442	26.1718	16.0973	146.498	49.9632	21.1346	98.2306	-2.2135	0.00163127	0.0594809	Mcm3	X	5323855	5326738	+	2747	protein_coding	- && Q9XYU1.1 RecName: Full=DNA replication licensing factor Mcm3; AltName: Full=Minichromosome maintenance 3 protein; Short=DmMCM3 && PF00493:MCM2/3/5 family|PF14551:MCM N-terminal domain	MCM
FBgn0031227	19.8906	31.0448	77.8271	100.852	25.4677	89.3393	-1.8142	0.00163825	0.0594809	CG3709	2L	153539	155305	-	1699	protein_coding	- && Q9VPK7.2 RecName: Full=Putative tRNA pseudouridine synthase Pus10; AltName: Full=Coiled-coil domain-containing protein 139 homolog; AltName: Full=tRNA pseudouridine 55 synthase; Short=Psi55 synthase; AltName: Full=tRNA pseudouridylate synthase; AltName: Full=tRNA-uridine isomerase && -	-
FBgn0027556	1006.05	447.275	347.933	139.712	726.66	243.822	1.57568	0.00163906	0.0594809	CG4928	X	16913180	16938209	+	4520	protein_coding	- && Q9Y115.1 RecName: Full=UNC93-like protein && PF05978:Ion channel regulatory protein UNC-93	-
FBgn0036181	189.484	121.879	43.0338	65.6923	155.682	54.3631	1.5191	0.00164956	0.0596252	Muc68Ca	3L	11610578	11620101	-	9524	protein_coding	- && - && -	-
FBgn0031252	1.04687	1.14981	63.1773	5.55146	1.09834	34.3644	-4.96962	0.00165867	0.0597187	CG13690	2L	418434	419652	-	1219	protein_coding	- && Q9VPP5.1 RecName: Full=Ribonuclease H2 subunit A; Short=RNase H2 subunit A; AltName: Full=Ribonuclease HI large subunit; Short=RNase HI large subunit; AltName: Full=Ribonuclease HI subunit A && PF01351:Ribonuclease HII	-
FBgn0037531	14.6562	12.6479	42.1182	90.6739	13.652	66.396	-2.28041	0.00167888	0.060029	CG10445	3R	7916599	7920299	-	3399	protein_coding	- && P34739.2 RecName: Full=Transcription termination factor 2; AltName: Full=Protein lodestar; AltName: Full=RNA polymerase II termination factor; AltName: Full=Transcription release factor 2 && PF00271:Helicase conserved C-terminal domain|PF00176:SNF2 family N-terminal domain	SNF2_N
FBgn0003863	26.1718	26.4456	61.3461	142.488	26.3087	101.917	-1.95369	0.00168042	0.060029	alphaTry	2R	11344260	11345119	-	860	protein_coding	- && P04814.1 RecName: Full=Trypsin alpha; Flags: Precursor && PF00089:Trypsin	Trypsin
FBgn0035358	129.812	86.2355	305.815	215.582	108.024	260.698	-1.2694	0.00171014	0.0608487	CG14949	3L	2642184	2643424	-	934	protein_coding	- && - && -	-
FBgn0261563	573.687	370.238	214.253	235.937	471.962	225.095	1.06878	0.00172103	0.0608487	wb	2L	14263027	14328262	+	13907	protein_coding	- && P19137.1 RecName: Full=Laminin subunit alpha-1; AltName: Full=Laminin A chain; AltName: Full=Laminin-1 subunit alpha; AltName: Full=Laminin-3 subunit alpha; AltName: Full=S-laminin subunit alpha; Short=S-LAM alpha; Flags: Precursor && PF00055:Laminin N-terminal (Domain VI)|PF00053:Laminin EGF domain|PF02210:Laminin G domain|PF00052:Laminin B (Domain IV)	Laminin_G_2
FBgn0021761	226.125	242.609	379.979	622.689	234.367	501.334	-1.09713	0.00172333	0.0608487	Nup154	2L	11004820	11010921	+	5420	protein_coding	- && Q99P88.1 RecName: Full=Nuclear pore complex protein Nup155; AltName: Full=155 kDa nucleoporin; AltName: Full=Nucleoporin Nup155 && PF05185:PRMT5 arginine-N-methyltransferase|PF08801:Nup133 N terminal like|PF03177:Non-repetitive/WGA-negative nucleoporin C-terminal	-
FBgn0011774	225.078	150.625	289.334	774.429	187.851	531.881	-1.50076	0.0017367	0.061085	Irbp	3R	11410047	11412440	+	2149	protein_coding	- && Q23976.3 RecName: Full=ATP-dependent DNA helicase 2 subunit 1; AltName: Full=ATP-dependent DNA helicase II subunit dp70; AltName: Full=ATP-dependent helicase Irbp; AltName: Full=Inverted repeat-binding protein; AltName: Full=Yolk protein factor 1 subunit beta && PF03730:Ku70/Ku80 C-terminal arm|PF03731:Ku70/Ku80 N-terminal alpha/beta domain|PF02735:Ku70/Ku80 beta-barrel domain	-
FBgn0050148	399.906	407.032	183.123	229.46	403.469	206.291	0.967816	0.0017465	0.0611946	CG30148	2R	20546595	20547658	-	1064	protein_coding	- && Q9NHA8.2 RecName: Full=Gram-negative bacteria-binding protein 3; Flags: Precursor && PF15886:Carbohydrate binding domain (family 32)	-
FBgn0031801	1191.34	1552.24	3287.05	2075.32	1371.79	2681.19	-0.966979	0.00176798	0.0617108	CG9498	2L	6349393	6351034	-	1514	protein_coding	- && - && PF02958:Ecdysteroid kinase	-
FBgn0035160	227.172	203.516	65.0085	109.179	215.344	87.0936	1.30646	0.00183004	0.0636339	hng3	3L	737680	755489	-	1529	protein_coding	- && - && PF02944:BESS motif|PF10545:Alcohol dehydrogenase transcription factor Myb/SANT-like	BESS
FBgn0265577	11.5156	0	65.9241	48.1127	5.7578	57.0184	-3.28756	0.00184348	0.0638585	lncRNA:IBIN	2R	17671068	17671295	+	228	ncRNA	- && - && -	-
FBgn0086443	2145.04	1946.62	3815.36	3074.58	2045.83	3444.97	-0.751749	0.00185164	0.0638991	AsnRS	2L	19129469	19131954	-	2375	protein_coding	- && Q2KJG3.3 RecName: Full=Asparagine--tRNA ligase, cytoplasmic; AltName: Full=Asparaginyl-tRNA synthetase; Short=AsnRS && PF01336:OB-fold nucleic acid binding domain|PF00152:tRNA synthetases class II (D, K and N)	tRNA-synt_2
FBgn0041004	80.6092	29.895	11.903	2.77573	55.2521	7.33935	2.91273	0.00186834	0.064233	CG17715	2L	22844220	22854541	+	6035	protein_coding	- && Q4VAE3.1 RecName: Full=Transmembrane protein 65 && PF10507:Protein of unknown function (DUF2453)	-
FBgn0031432	656.39	589.851	941.25	1458.18	623.12	1199.72	-0.944943	0.00192459	0.0657925	Cyp309a1	2L	2562483	2564830	-	1997	protein_coding	- && Q9VQD2.4 RecName: Full=Probable cytochrome P450 309a1; AltName: Full=CYPCCCIXA1 && PF00067:Cytochrome P450	p450
FBgn0033304	1817.37	1944.32	508.165	1151	1880.85	829.584	1.18095	0.00193505	0.0657925	Cyp6a13	2R	8570499	8572147	+	1649	protein_coding	- && Q9V4U9.1 RecName: Full=Probable cytochrome P450 6a13; AltName: Full=CYPVIA13 && PF00067:Cytochrome P450	p450
FBgn0034915	479.468	400.133	560.355	1996.68	439.8	1278.52	-1.5394	0.00193529	0.0657925	eIF6	2R	23849246	23850301	-	1056	protein_coding	- && P56538.3 RecName: Full=Eukaryotic translation initiation factor 6; Short=eIF-6 && PF01912:eIF-6 family	-
FBgn0031406	1.04687	26.4456	103.464	96.2253	13.7462	99.8448	-2.87191	0.00195418	0.0661888	Send1	2L	2254176	2255050	-	875	protein_coding	- && P04814.1 RecName: Full=Trypsin alpha; Flags: Precursor && PF00089:Trypsin	Trypsin
FBgn0037924	123.531	139.127	242.637	318.284	131.329	280.461	-1.09509	0.00197807	0.0667506	CG14712	3R	11628759	11633206	+	4250	protein_coding	- && - && -	-
FBgn0086691	4033.6	4906.22	2831.08	2560.15	4469.91	2695.61	0.729568	0.00198922	0.0668123	UK114	2L	15274181	15275091	-	610	protein_coding	- && Q9V3W0.1 RecName: Full=RutC family protein UK114 && PF01042:Endoribonuclease L-PSP	Ribonuc_L-PSP
FBgn0037345	59.6718	68.9884	119.03	257.218	64.3301	188.124	-1.54866	0.00200765	0.0668123	Rev7	3R	5588873	5589703	+	831	protein_coding	- && - && PF02301:HORMA domain	HORMA
FBgn0267339	35.5937	37.9436	87.8988	135.086	36.7687	111.492	-1.60074	0.00200827	0.0668123	p38c	3R	24149020	24150203	-	1184	protein_coding	- && P83100.1 RecName: Full=Putative mitogen-activated protein kinase 14C; Short=MAP kinase 14C; Short=MAPK 14C; AltName: Full=MAP kinase p38c && PF00069:Protein kinase domain	Pkinase
FBgn0266405	19.8906	8.04865	75.0803	56.4399	13.9696	65.7601	-2.22706	0.00200912	0.0668123	lncRNA:CR45045	3R	17667577	17667825	+	249	ncRNA	- && - && -	-
FBgn0038292	53.3905	118.43	14.6498	25.9068	85.9103	20.2783	2.08168	0.00201829	0.0668741	CG3987	3R	15139958	15141715	+	1483	protein_coding	- && - && -	-
FBgn0037697	1637.31	1248.69	608.883	896.561	1443	752.722	0.939078	0.00203285	0.0671134	GstZ2	3R	9456815	9460652	-	2325	protein_coding	- && Q9VHD2.1 RecName: Full=Probable maleylacetoacetate isomerase 2; Short=MAAI 2; AltName: Full=Glutathione S-transferase zeta 2 && PF13417:Glutathione S-transferase, N-terminal domain	-
FBgn0028563	2000.57	1672.97	880.82	1178.76	1836.77	1029.79	0.834952	0.00204194	0.0671711	sut1	2R	8082976	8087151	+	2412	protein_coding	- && P47843.1 RecName: Full=Solute carrier family 2, facilitated glucose transporter member 3; AltName: Full=Glucose transporter type 3, brain; Short=GLUT-3 && PF00083:Sugar (and other) transporter	Sugar_tr
FBgn0051072	660.577	389.784	245.384	249.816	525.181	247.6	1.08543	0.00206256	0.0675838	Lerp	3R	26842462	26863130	-	3615	protein_coding	- && - && PF00878:Cation-independent mannose-6-phosphate receptor repeat	-
FBgn0034403	6.28124	4.59923	103.464	11.1029	5.44023	57.2836	-3.39347	0.00206927	0.0675838	CG18190	2R	18851907	18853043	-	1077	protein_coding	- && Q61166.3 RecName: Full=Microtubule-associated protein RP/EB family member 1; AltName: Full=APC-binding protein EB1; AltName: Full=End-binding protein 1; Short=EB1 && PF00307:Calponin homology (CH) domain	CH
FBgn0039731	2.09375	4.59923	38.4557	25.9068	3.34649	32.1813	-3.27769	0.00208397	0.0676941	Sas-6	3R	29995357	29997034	+	1507	protein_coding	- && Q9VAC8.2 RecName: Full=Spindle assembly abnormal protein 6 homolog && PF16531:Centriolar protein SAS N-terminal	-
FBgn0024352	1159.94	1205	1984.13	1857.89	1182.47	1921.01	-0.700119	0.00208745	0.0676941	Stip1	2L	295122	297449	+	2023	protein_coding	- && Q3ZBZ8.1 RecName: Full=Stress-induced-phosphoprotein 1; Short=STI1; AltName: Full=Hsc70/Hsp90-organizing protein; Short=Hop && PF00515:Tetratricopeptide repeat|PF13181:Tetratricopeptide repeat|PF13414:TPR repeat	TPR_1
FBgn0026196	934.858	891.1	1390.82	1723.73	912.979	1557.27	-0.770288	0.00211564	0.0683659	nop5	2L	6916753	6918743	-	1813	protein_coding	- && Q4R779.1 RecName: Full=Nucleolar protein 58; AltName: Full=Nucleolar protein 5 && PF08156:NOP5NT (NUC127) domain|PF01798:snoRNA binding domain, fibrillarin	-
FBgn0053505	100.5	77.037	175.798	247.965	88.7684	211.881	-1.25375	0.00213759	0.0688318	U3-55K	2R	14858845	14860758	-	1690	protein_coding	- && O43818.1 RecName: Full=U3 small nucleolar RNA-interacting protein 2; AltName: Full=RRP9 homolog; AltName: Full=U3 small nucleolar ribonucleoprotein-associated 55 kDa protein; Short=U3 snoRNP-associated 55 kDa protein; Short=U3-55K && -	-
FBgn0036876	1010.23	1178.55	1689.31	2047.56	1094.39	1868.43	-0.771859	0.0021474	0.0689053	CG9451	3L	19498197	19500798	-	1592	protein_coding	- && Q5BLY5.1 RecName: Full=Venom acid phosphatase Acph-1; AltName: Allergen=Api m 3; Flags: Precursor && PF00328:Histidine phosphatase superfamily (branch 2)	Acid_phosphat_A
FBgn0262732	1046.87	1257.89	1653.6	3085.69	1152.38	2369.64	-1.04014	0.00217173	0.0692317	mbf1	3L	16574436	16576871	+	1788	protein_coding	- && Q6GPQ6.1 RecName: Full=Endothelial differentiation-related factor 1 homolog; Short=EDF-1 && PF08523:Multiprotein bridging factor 1|PF01381:Helix-turn-helix	HTH_3
FBgn0031068	268	315.047	437.663	904.888	291.523	671.276	-1.20352	0.00217272	0.0692317	Alr	X	19748314	19750167	+	1362	protein_coding	- && Q63042.2 RecName: Full=FAD-linked sulfhydryl oxidase ALR; AltName: Full=Augmenter of liver regeneration && PF04777:Erv1 / Alr family	Evr1_Alr
FBgn0003137	1802.72	2730.79	3846.49	4411.56	2266.75	4129.03	-0.865345	0.00220771	0.0701024	Ppn	3R	28520665	28540324	-	9544	protein_coding	- && Q868Z9.2 RecName: Full=Papilin; Flags: Precursor && PF07679:Immunoglobulin I-set domain|PF00090:Thrombospondin type 1 domain|PF08686:PLAC (protease and lacunin) domain|PF05986:ADAM-TS Spacer 1|PF00014:Kunitz/Bovine pancreatic trypsin inhibitor domain	I-set
FBgn0038972	124.578	123.029	227.072	302.555	123.804	264.813	-1.0968	0.00223462	0.0707115	CG7054	3R	22464985	22465938	+	893	protein_coding	- && P31729.2 RecName: Full=OV-16 antigen; Flags: Precursor && PF01161:Phosphatidylethanolamine-binding protein	-
FBgn0052750	23.0312	49.4417	5.49368	3.70097	36.2364	4.59733	2.97602	0.00228885	0.0721776	CG32750	X	6194737	6196439	-	1645	protein_coding	- && P83548.1 RecName: Full=Vanin-like protein 3; Flags: Precursor && PF00795:Carbon-nitrogen hydrolase	CN_hydrolase
FBgn0259229	205.187	434.627	140.089	110.104	319.907	125.096	1.35365	0.00232208	0.0727793	CG42329	2L	1219293	1229802	+	2477	protein_coding	- && Q8BML2.1 RecName: Full=O-acyltransferase like protein; AltName: Full=Protein oacyl; Flags: Precursor && PF01757:Acyltransferase family	-
FBgn0050105	9.42186	5.74903	35.7089	53.6641	7.58545	44.6865	-2.55252	0.00232384	0.0727793	CG30105	2R	17591804	17592509	-	642	protein_coding	- && - && PF08615:Ribonuclease H2 non-catalytic subunit (Ylr154p-like)	-
FBgn0036549	481.562	671.487	167.557	330.312	576.524	248.935	1.21145	0.00233447	0.0728625	CG10516	3L	15968204	15969902	+	1329	protein_coding	- && Q28DT9.1 RecName: Full=SPRY domain-containing SOCS box protein 3; Short=SSB-3 && PF00622:SPRY domain	SPRY
FBgn0013688	4091.18	3470.12	1521.75	2481.5	3780.65	2001.63	0.917517	0.002371	0.0731958	mt:srRNA	mitochondrion_genome	14131	14916	-	786	rRNA	- && - && -	-
FBgn0038450	12347.9	32674.1	10716.3	8196.73	22511	9456.53	1.25122	0.00239462	0.0731958	CG17560	3R	16617950	16619878	+	1712	protein_coding	- && A1ZAI5.1 RecName: Full=Putative fatty acyl-CoA reductase CG5065 && PF03015:Male sterility protein|PF07993:Male sterility protein	NAD_binding_4
FBgn0034958	1422.7	1344.12	804.824	876.206	1383.41	840.515	0.718956	0.00240017	0.0731958	CG3907	2R	24019898	24022298	-	1767	protein_coding	- && - && -	-
FBgn0051343	73.2811	88.5351	27.4684	21.2806	80.9081	24.3745	1.73009	0.00240254	0.0731958	CG31343	3R	21745266	21749003	+	3004	protein_coding	- && P79098.4 RecName: Full=Aminopeptidase N; Short=AP-N; Short=bAPN; AltName: Full=Alanyl aminopeptidase; AltName: Full=Aminopeptidase M; Short=AP-M; AltName: Full=Microsomal aminopeptidase; AltName: CD_antigen=CD13 && PF11838:ERAP1-like C-terminal domain|PF01433:Peptidase family M1	-
FBgn0034641	696.171	533.51	858.845	2042.94	614.841	1450.89	-1.23843	0.0024069	0.0731958	mahj	2R	21625030	21631422	+	5346	protein_coding	- && Q9W2F2.2 RecName: Full=Protein mahjong; AltName: Full=DDB1- and CUL4-associated factor-like 1; AltName: Full=VPRBP-like protein && -	-
FBgn0037548	1326.39	1638.47	758.127	936.347	1482.43	847.237	0.806997	0.00240911	0.0731958	CG7900	3R	8094124	8105083	+	1879	protein_coding	- && Q05AM4.1 RecName: Full=Fatty-acid amide hydrolase 2-B && PF01425:Amidase	Amidase
FBgn0283480	59.6718	47.1421	5.49368	14.8039	53.4069	10.1488	2.39727	0.00240912	0.0731958	Alp2	2R	22206005	22207987	-	1762	protein_coding	- && P29523.4 RecName: Full=Membrane-bound alkaline phosphatase; Short=M-ALP; Flags: Precursor && PF00245:Alkaline phosphatase	-
FBgn0004777	20.9375	12.6479	115.367	42.5612	16.7927	78.9642	-2.22975	0.0024196	0.0731958	Ccp84Ag	3R	6686728	6688039	+	1097	protein_coding	- && P80682.1 RecName: Full=Larval cuticle protein A2B; AltName: Full=TM-LCP A2B; Short=TM-A2B && PF00379:Insect cuticle protein	Chitin_bind_4
FBgn0033683	1436.31	1461.4	906.457	875.28	1448.86	890.869	0.701608	0.00243259	0.0731958	CG18343	2R	12138695	12139324	+	630	protein_coding	- && - && -	-
FBgn0038581	88.9842	96.5838	15.5654	36.0845	92.784	25.825	1.84547	0.00243839	0.0731958	CG14314	3R	18216142	18218014	+	1606	protein_coding	- && - && PF02958:Ecdysteroid kinase	-
FBgn0037504	120.39	100.033	210.591	271.096	110.212	240.844	-1.12687	0.00243847	0.0731958	CG1142	3R	7472458	7473781	-	911	protein_coding	- && Q8R2M2.1 RecName: Full=Deoxynucleotidyltransferase terminal-interacting protein 2 && PF08698:Fcf2 pre-rRNA processing	-
FBgn0024366	127.719	202.366	56.768	70.3185	165.042	63.5433	1.37607	0.00244119	0.0731958	CG11409	X	1329518	1341587	-	4720	protein_coding	- && - && -	-
FBgn0259791	0	2.29961	84.2364	1.85049	1.14981	43.0434	-5.26116	0.0024665	0.0735495	bora	3L	18622692	18624751	+	2002	protein_coding	- && Q9VVR2.1 RecName: Full=Protein aurora borealis && PF15280:Protein aurora borealis N-terminus	-
FBgn0052641	100.5	112.681	190.447	304.405	106.59	247.426	-1.21533	0.00247663	0.0735495	CG32641	X	13184478	13184996	+	466	protein_coding	- && Q56237.2 RecName: Full=Chaperone protein DnaJ 2 && PF00226:DnaJ domain	DnaJ
FBgn0260399	5.23437	14.9475	195.941	9.25244	10.0909	102.597	-3.35154	0.00247738	0.0735495	gwl	3R	18746370	18750360	+	3099	protein_coding	- && E1BFR5.1 RecName: Full=Serine/threonine-protein kinase greatwall; Short=GW; Short=GWL; AltName: Full=Microtubule-associated serine/threonine-protein kinase-like; Short=MAST-L && PF00069:Protein kinase domain	Pkinase
FBgn0261822	1706.4	1466	3837.33	2265.92	1586.2	3051.63	-0.943939	0.00248516	0.0735495	Bsg	2L	8083420	8116531	+	11657	protein_coding	- && P35613.2 RecName: Full=Basigin; AltName: Full=5F7; AltName: Full=Collagenase stimulatory factor; AltName: Full=Extracellular matrix metalloproteinase inducer; Short=EMMPRIN; AltName: Full=Leukocyte activation antigen M6; AltName: Full=OK blood group antigen; AltName: Full=Tumor cell-derived collagenase stimulatory factor; Short=TCSF; AltName: CD_antigen=CD147; Flags: Precursor && PF00047:Imm…	ig
FBgn0030310	1456.2	1033.68	660.157	720.765	1244.94	690.461	0.850721	0.00251826	0.0742887	PGRP-SA	X	11561643	11562779	+	1018	protein_coding	- && Q9VYX7.1 RecName: Full=Peptidoglycan-recognition protein SA; AltName: Full=Protein semmelweis; Flags: Precursor && PF01510:N-acetylmuramoyl-L-alanine amidase	-
FBgn0037141	58.6249	27.5954	129.101	131.385	43.1101	130.243	-1.59079	0.00257737	0.075788	DNApol-eta	3L	21938634	21941812	-	3067	protein_coding	- && Q9Y253.1 RecName: Full=DNA polymerase eta; AltName: Full=RAD30 homolog A; AltName: Full=Xeroderma pigmentosum variant type protein && PF11799:impB/mucB/samB family C-terminal domain|PF00817:impB/mucB/samB family	IMS
FBgn0038460	104.687	49.4417	232.566	183.198	77.0645	207.882	-1.42862	0.00259786	0.0761455	CG18622	3R	16983510	16987732	-	1272	protein_coding	- && - && -	-
FBgn0037025	1.04687	0	43.9494	9.25244	0.523437	26.6009	-5.60779	0.00262637	0.0767202	Spc105R	3L	20800410	20806853	+	6195	protein_coding	- && - && -	-
FBgn0034383	15.7031	21.8463	46.6963	112.88	18.7747	79.788	-2.08975	0.00263424	0.0767202	CG17821	2R	18743806	18744996	-	1073	protein_coding	- && A0JNC4.1 RecName: Full=Elongation of very long chain fatty acids protein 7; AltName: Full=3-keto acyl-CoA synthase ELOVL7; AltName: Full=ELOVL fatty acid elongase 7; Short=ELOVL FA elongase 7; AltName: Full=Very long chain 3-ketoacyl-CoA synthase 7; AltName: Full=Very long chain 3-oxoacyl-CoA synthase 7 && PF01151:GNS1/SUR4 family	ELO
FBgn0034053	1623.7	2429.54	948.575	1223.17	2026.62	1085.87	0.900069	0.00267533	0.0776694	Cyp4aa1	2R	15942864	15947266	+	2108	protein_coding	- && Q9V7G5.2 RecName: Full=Probable cytochrome P450 4aa1; AltName: Full=CYPIVAA1 && PF00067:Cytochrome P450	p450
FBgn0035356	430.265	769.221	310.393	248.891	599.743	279.642	1.10017	0.00271894	0.0786858	CG16986	3L	2600331	2601536	+	769	protein_coding	- && Q9NPJ3.1 RecName: Full=Acyl-coenzyme A thioesterase 13; Short=Acyl-CoA thioesterase 13; AltName: Full=Thioesterase superfamily member 2; Contains: RecName: Full=Acyl-coenzyme A thioesterase 13, N-terminally processed >Q5R833.1 RecName: Full=Acyl-coenzyme A thioesterase 13; Short=Acyl-CoA thioesterase 13; AltName: Full=Thioesterase superfamily member 2; Contains: RecName: Full=Acyl-coenzyme A…	4HBT
FBgn0051864	21.9843	41.393	72.3334	155.441	31.6887	113.887	-1.8491	0.0027679	0.079833	Qtzl	2L	11995740	11996723	+	926	protein_coding	- && Q9VKD3.1 RecName: Full=Probable cysteine desulfurase, mitochondrial; Flags: Precursor && -	-
novel.75	16.75	28.7452	0.915613	1.85049	22.7476	1.38305	4.03969	0.00277604	0.079833	-	X	27309	36179	-	8675	-	- && P21329.1 RecName: Full=RNA-directed DNA polymerase from mobile element jockey; AltName: Full=Reverse transcriptase && PF03943:TAP C-terminal domain	-
FBgn0051760	19.8906	25.2957	69.5866	83.2719	22.5932	76.4293	-1.76031	0.00280832	0.080508	CG31760	2L	12142780	12170508	+	4723	protein_coding	- && Q9VKA4.3 RecName: Full=Probable G-protein coupled receptor CG31760 && PF00003:7 transmembrane sweet-taste receptor of 3 GCPR	7tm_3
FBgn0036306	188.437	154.074	278.346	480.201	171.256	379.274	-1.14642	0.00289725	0.0827448	CG10973	3L	12753239	12754774	-	1032	protein_coding	- && Q5AYT7.1 RecName: Full=Hsp70 nucleotide exchange factor fes1 && PF08609:Nucleotide exchange factor Fes1	-
FBgn0033204	144.469	134.527	252.709	311.807	139.498	282.258	-1.0164	0.00291408	0.0827448	CG2065	2R	7663786	7665269	+	1233	protein_coding	- && Q8NBN7.2 RecName: Full=Retinol dehydrogenase 13; AltName: Full=Short chain dehydrogenase/reductase family 7C member 3 && PF00106:short chain dehydrogenase	adh_short
FBgn0005655	33.4999	10.3483	254.54	29.6078	21.9241	142.074	-2.69186	0.00291493	0.0827448	PCNA	2R	20261754	20262883	-	1070	protein_coding	- && P17917.2 RecName: Full=Proliferating cell nuclear antigen; Short=PCNA; AltName: Full=Cyclin; AltName: Full=Mutagen-sensitive 209 protein && PF02747:Proliferating cell nuclear antigen, C-terminal domain|PF00705:Proliferating cell nuclear antigen, N-terminal domain	PCNA_C
FBgn0035901	115.156	93.1343	182.207	316.433	104.145	249.32	-1.25847	0.00292253	0.0827448	Pus7	3L	8510003	8513007	+	2770	protein_coding	- && Q08DI8.1 RecName: Full=Pseudouridylate synthase 7 homolog && PF01142:tRNA pseudouridine synthase D (TruD)	-
FBgn0041629	6539.82	7167.89	1962.16	4429.14	6853.86	3195.65	1.10081	0.00295139	0.0833039	Hexo2	X	8709652	8712478	+	2140	protein_coding	- && P49010.1 RecName: Full=Chitooligosaccharidolytic beta-N-acetylglucosaminidase; AltName: Full=Beta-GlcNAcase; AltName: Full=Beta-N-acetylhexosaminidase; AltName: Full=Beta-hexosaminidase; Flags: Precursor && PF14845:beta-acetyl hexosaminidase like|PF00728:Glycosyl hydrolase family 20, catalytic domain	Glyco_hydro_20
FBgn0025680	4952.76	7012.67	3543.42	3455.78	5982.71	3499.6	0.773542	0.00298236	0.083919	cry	3R	19212154	19215442	+	1896	protein_coding	- && O77059.1 RecName: Full=Cryptochrome-1; Short=DmCRY1; Short=dcry; AltName: Full=Blue light photoreceptor && PF03441:FAD binding domain of DNA photolyase|PF00875:DNA photolyase	-
FBgn0035996	23.0312	36.7938	50.3587	210.956	29.9125	130.657	-2.129	0.00302371	0.0848216	CG3448	3L	9450545	9451572	-	1028	protein_coding	- && - && PF06632:DNA double-strand break repair and V(D)J recombination protein XRCC4	-
FBgn0036121	79.5624	50.5915	193.194	140.637	65.0769	166.916	-1.35659	0.00304136	0.0850557	CG6310	3L	11069043	11069864	-	690	protein_coding	- && - && -	-
FBgn0024371	224.031	192.018	370.823	409.883	208.024	390.353	-0.907418	0.00305646	0.0851043	E2f2	2L	21154293	21156749	-	2002	protein_coding	- && O77051.1 RecName: Full=Transcription factor E2F2; Short=dE2F2; AltName: Full=E2F transcription factor 2; AltName: Full=E2F-like transcription factor E2F2 && PF02319:E2F/DP family winged-helix DNA-binding domain	E2F_TDP
FBgn0034187	1.04687	3.44942	108.958	0.925244	2.24815	54.9416	-4.6239	0.003065	0.0851043	CG6967	2R	17062775	17066546	+	3474	protein_coding	- && Q1LXK5.1 RecName: Full=Putative helicase mov-10-B.2 && PF13087:AAA domain|PF13086:AAA domain	-
FBgn0032848	1.04687	0	37.5401	11.1029	0.523437	24.3215	-5.47835	0.00307101	0.0851043	nesd	2L	20093972	20096253	+	2134	protein_coding	- && Q9VIP0.1 RecName: Full=Protein nessun dorma && -	-
FBgn0027081	1577.64	1691.37	2495.05	2685.98	1634.5	2590.51	-0.664448	0.0030807	0.0851149	ThrRS	2L	12103751	12107170	+	2896	protein_coding	- && Q9D0R2.2 RecName: Full=Threonine--tRNA ligase, cytoplasmic; AltName: Full=Threonyl-tRNA synthetase; Short=ThrRS && PF00587:tRNA synthetase class II core domain (G, H, P, S and T)|PF02824:TGS domain|PF07973:Threonyl and Alanyl tRNA synthetase second additional domain|PF03129:Anticodon binding domain	tRNA-synt_2b
FBgn0033926	1537.86	1598.23	3718.3	20836.5	1568.04	12277.4	-2.96897	0.00315886	0.0869697	Arc1	2R	14357927	14360297	-	2371	protein_coding	- && - && -	-
FBgn0039099	1669.76	1759.2	1098.74	1047.38	1714.48	1073.06	0.675998	0.00316686	0.0869697	GILT2	3R	23678895	23679855	+	712	protein_coding	- && A6QPN6.1 RecName: Full=Gamma-interferon-inducible lysosomal thiol reductase; AltName: Full=IFI30 protein; Flags: Precursor && PF03227:Gamma interferon inducible lysosomal thiol reductase (GILT)	-
FBgn0035969	6.28124	2.29961	102.549	6.47671	4.29043	54.5127	-3.65832	0.00320683	0.0874586	CG4476	3L	9211880	9215256	+	2400	protein_coding	- && B3MRS1.1 RecName: Full=Sodium-dependent nutrient amino acid transporter 1 && PF00209:Sodium:neurotransmitter symporter family	SNF
FBgn0039430	6436.18	7027.62	3222.04	4618.82	6731.9	3920.43	0.779996	0.00320856	0.0874586	CG5455	3R	26461527	26470008	+	3002	protein_coding	- && - && -	-
FBgn0029769	5705.46	7586.42	2984.9	4373.63	6645.94	3679.26	0.853026	0.00321335	0.0874586	frma	X	5493014	5496052	-	2975	protein_coding	- && P78562.1 RecName: Full=Phosphate-regulating neutral endopeptidase; AltName: Full=Metalloendopeptidase homolog PEX; AltName: Full=Vitamin D-resistant hypophosphatemic rickets protein; AltName: Full=X-linked hypophosphatemia protein; Short=HYP && PF05649:Peptidase family M13|PF01431:Peptidase family M13	-
FBgn0012042	2398.39	2802.08	6495.36	3577.92	2600.23	5036.64	-0.953872	0.00326659	0.0882252	AttA	2R	14747362	14748215	+	790	protein_coding	- && P45884.1 RecName: Full=Attacin-A; Flags: Precursor && PF03769:Attacin, C-terminal region|PF03768:Attacin, N-terminal region	-
FBgn0013676	137796	180318	96966.2	98776.2	159057	97871.2	0.700586	0.003269	0.0882252	mt:CoIII	mitochondrion_genome	4736	5524	+	789	protein_coding	- && P00417.1 RecName: Full=Cytochrome c oxidase subunit 3; AltName: Full=Cytochrome c oxidase polypeptide III && -	-
FBgn0037065	20.9375	11.4981	46.6963	92.5244	16.2178	69.6103	-2.09669	0.00327046	0.0882252	CG12974	3L	21281752	21285962	-	2452	protein_coding	- && - && -	-
FBgn0027500	46.0624	20.6965	324.127	38.8602	33.3795	181.494	-2.44054	0.00329248	0.0885581	spd-2	3L	16591207	16595014	-	3686	protein_coding	- && - && -	-
FBgn0032167	315.109	244.909	487.106	544.968	280.009	516.037	-0.881235	0.00330355	0.0885951	CG5853	2L	9940773	9947648	-	2623	protein_coding	- && Q9H172.2 RecName: Full=ATP-binding cassette sub-family G member 4 && PF00005:ABC transporter|PF01061:ABC-2 type transporter	ABC2_membrane
FBgn0014906	273.234	272.504	501.756	465.398	272.869	483.577	-0.825542	0.00333325	0.0890743	Hydr2	2L	3163645	3169462	+	2857	protein_coding	- && Q24093.2 RecName: Full=Abhydrolase domain-containing protein 2 && PF00561:alpha/beta hydrolase fold	Abhydrolase_1
FBgn0037137	946.373	742.775	1227.84	2028.13	844.574	1627.99	-0.946561	0.00334089	0.0890743	Nopp140	3L	21832774	21836685	+	3232	protein_coding	- && P41777.1 RecName: Full=Nucleolar and coiled-body phosphoprotein 1; AltName: Full=140 kDa nucleolar phosphoprotein; Short=Nopp140; AltName: Full=Nucleolar 130 kDa protein; AltName: Full=Nucleolar phosphoprotein p130 && PF05022:SRP40, C-terminal domain	-
FBgn0031540	45.0156	26.4456	150.161	80.4962	35.7306	115.328	-1.68749	0.00338614	0.0900145	Pif1	2L	3467342	3470004	-	2611	protein_coding	- && Q0R4F1.1 RecName: Full=ATP-dependent DNA helicase PIF1; AltName: Full=DNA repair and recombination helicase PIF1 && PF05970:PIF1-like helicase	-
FBgn0036290	334.999	474.87	551.199	1448.93	404.935	1000.07	-1.30463	0.00339584	0.0900145	CG10638	3L	12498106	12501311	-	2446	protein_coding	- && P07943.3 RecName: Full=Aldose reductase; Short=AR; AltName: Full=Aldehyde reductase && PF00248:Aldo/keto reductase family	Aldo_ket_red
FBgn0031645	14267.8	13234.3	22803.3	20006.5	13751.1	21404.9	-0.638394	0.00341312	0.0902109	CG3036	2L	4892112	4903889	+	2731	protein_coding	- && Q8BN82.2 RecName: Full=Sialin; AltName: Full=H(+)/nitrate cotransporter; AltName: Full=H(+)/sialic acid cotransporter; Short=AST; AltName: Full=Solute carrier family 17 member 5; AltName: Full=Vesicular H(+)/Aspartate-glutamate cotransporter && PF07690:Major Facilitator Superfamily	MFS_1
FBgn0038306	159.125	178.22	270.106	455.22	168.672	362.663	-1.10469	0.00342861	0.0902943	Art3	3R	15227605	15229408	-	1804	protein_coding	- && O60678.3 RecName: Full=Protein arginine N-methyltransferase 3; AltName: Full=Heterogeneous nuclear ribonucleoprotein methyltransferase-like protein 3 && PF13847:Methyltransferase domain	-
FBgn0267972	1923.11	2189.23	1310.24	1259.26	2056.17	1284.75	0.678377	0.00344118	0.0902943	Der-1	2L	1973957	1975413	+	1243	protein_coding	- && Q9VQ57.1 RecName: Full=Derlin-1; AltName: Full=DER1-like protein 1 && PF04511:Der1-like family	-
FBgn0030067	202.047	182.819	311.308	467.248	192.433	389.278	-1.01606	0.0034459	0.0902943	Rbm13	X	8901699	8903761	+	1535	protein_coding	- && Q66L33.1 RecName: Full=Protein MAK16 homolog A; AltName: Full=MAK16-like protein A [Xenopus laevis] && PF04874:Mak16 protein C-terminal region|PF01778:Ribosomal L28e protein family	-
FBgn0022774	4903.55	3068.83	2321.08	2079.02	3986.19	2200.05	0.857574	0.00348669	0.0910102	Oat	3L	19647280	19649851	-	1501	protein_coding	- && Q9VW26.1 RecName: Full=Ornithine aminotransferase, mitochondrial; AltName: Full=Ornithine--oxo-acid aminotransferase; Flags: Precursor && PF00202:Aminotransferase class-III	Aminotran_3
FBgn0030014	1200.76	463.372	1974.98	1851.41	832.068	1913.19	-1.20073	0.00349312	0.0910102	CG15337	X	8160054	8161552	+	1430	protein_coding	- && - && -	-
FBgn0286788	39.7812	14.9475	207.844	49.9632	27.3643	128.904	-2.23193	0.00351419	0.091077	Orc1	2R	7522437	7525716	-	3152	protein_coding	- && O16810.2 RecName: Full=Origin recognition complex subunit 1; Short=DmORC1 && PF01426:BAH domain|PF00004:ATPase family associated with various cellular activities (AAA)|PF09079:CDC6, C terminal	AAA
FBgn0051106	303.593	72.4378	61.3461	37.0097	188.016	49.1779	1.93579	0.0035156	0.091077	CG31106	3R	25216297	25218708	+	1676	protein_coding	- && - && PF07690:Major Facilitator Superfamily	MFS_1
FBgn0017577	32.4531	22.9961	228.903	38.8602	27.7246	133.882	-2.27037	0.00353372	0.0912877	Mcm5	3R	10788524	10791150	+	2452	protein_coding	- && Q9VGW6.1 RecName: Full=DNA replication licensing factor Mcm5; AltName: Full=Minichromosome maintenance 5 protein; Short=DmMCM5 && PF14551:MCM N-terminal domain|PF00493:MCM2/3/5 family	MCM
FBgn0033763	119.344	240.31	9.15613	67.5428	179.827	38.3495	2.22929	0.00356802	0.0916682	CG8646	2R	12655954	12659341	+	1763	protein_coding	- && Q32KI9.1 RecName: Full=Arylsulfatase I; Short=ASI; Flags: Precursor && PF14707:C-terminal region of aryl-sulfatase|PF00884:Sulfatase	Sulfatase
FBgn0266758	2817.14	3104.48	1843.13	1930.06	2960.81	1886.59	0.650159	0.00358133	0.0916682	Esyt2	3R	24544719	24556549	+	3510	protein_coding	- && Q7ZWU7.1 RecName: Full=Extended synaptotagmin-2-B; Short=E-Syt2-B && PF00168:C2 domain|PF17047:Synaptotagmin-like mitochondrial-lipid-binding domain	C2
FBgn0259221	1310.69	1649.97	908.288	865.103	1480.33	886.695	0.739214	0.00358634	0.0916682	ATP8A	2R	13414978	13439051	-	9093	protein_coding	- && Q9Y2Q0.1 RecName: Full=Phospholipid-transporting ATPase IA; AltName: Full=ATPase class I type 8A member 1; AltName: Full=Chromaffin granule ATPase II; AltName: Full=P4-ATPase flippase complex alpha subunit ATP8A1 && PF12710:haloacid dehalogenase-like hydrolase|PF00122:E1-E2 ATPase|PF16209:Phospholipid-translocating ATPase N-terminal|PF16212:Phospholipid-translocating P-type ATPase C-terminal	E1-E2_ATPase
FBgn0035438	5182.02	5475.38	7703.97	9014.65	5328.7	8359.31	-0.649613	0.00359552	0.0916682	PHGPx	3L	3326265	3328626	+	1359	protein_coding	- && O23814.1 RecName: Full=Probable phospholipid hydroperoxide glutathione peroxidase; Short=PHGPx && PF00255:Glutathione peroxidase	GSHPx
FBgn0038903	24.0781	16.0973	65.9241	74.9447	20.0877	70.4344	-1.80637	0.00359857	0.0916682	RpI12	3R	21777203	21777847	-	530	protein_coding	- && Q6MFY5.1 RecName: Full=DNA-directed RNA polymerase I subunit RPA12; AltName: Full=Zinc ribbon domain-containing protein 1 && PF01096:Transcription factor S-II (TFIIS)	-
FBgn0050000	612.421	654.24	908.288	1472.06	633.33	1190.18	-0.910196	0.00362984	0.092208	GstT1	2R	9605988	9607184	+	997	protein_coding	- && Q01579.2 RecName: Full=Glutathione S-transferase theta-1; AltName: Full=GST 5-5; AltName: Full=GST class-theta-1; AltName: Full=Glutathione S-transferase 5 && PF02798:Glutathione S-transferase, N-terminal domain|PF00043:Glutathione S-transferase, C-terminal domain	GST_C
FBgn0034401	472.14	432.327	823.136	716.139	452.234	769.637	-0.766918	0.00366013	0.0925053	MetRS	2R	18846858	18850599	-	3403	protein_coding	- && P56192.2 RecName: Full=Methionine--tRNA ligase, cytoplasmic; AltName: Full=Methionyl-tRNA synthetase; Short=MetRS && PF14497:Glutathione S-transferase, C-terminal domain|PF09334:tRNA synthetases class I (M)|PF00458:WHEP-TRS domain	-
FBgn0033247	1505.4	1489	886.313	980.758	1497.2	933.536	0.681516	0.00366903	0.0925053	Nup44A	2R	7988462	7991283	+	1379	protein_coding	- && C1BK83.1 RecName: Full=Nucleoporin seh1; AltName: Full=Nup107-160 subcomplex subunit seh1 && -	-
FBgn0034715	58.6249	17.2471	6.40929	2.77573	37.936	4.59251	3.04764	0.00367189	0.0925053	Oatp58Db	2R	22221180	22223499	-	2090	protein_coding	- && Q9H2Y9.2 RecName: Full=Solute carrier organic anion transporter family member 5A1; AltName: Full=Organic anion transporter polypeptide-related protein 4; Short=OATP-RP4; Short=OATPRP4; AltName: Full=Solute carrier family 21 member 15 && PF03137:Organic Anion Transporter Polypeptide (OATP) family	-
novel.7	60.7187	80.4865	119.945	275.723	70.6026	197.834	-1.4875	0.00373804	0.0939131	-	211000022280517	3869	5463	-	1509	-	- && - && -	-
FBgn0039927	399.906	492.117	267.359	195.226	446.011	231.293	0.94693	0.00377102	0.0944088	CG11155	4	1126602	1137919	+	6415	protein_coding	- && P39087.4 RecName: Full=Glutamate receptor ionotropic, kainate 2; Short=GluK2; AltName: Full=Glutamate receptor 6; Short=GluR-6; Short=GluR6; AltName: Full=Glutamate receptor beta-2; Short=GluR beta-2; Flags: Precursor && PF01094:Receptor family ligand binding region|PF10613:Ligated ion channel L-glutamate- and glycine-binding site|PF00060:Ligand-gated ion channel	Lig_chan
FBgn0039856	3720.59	3688.58	2363.2	2446.34	3704.58	2404.77	0.623418	0.00378281	0.0944088	CG1774	3R	31592803	31594719	+	1860	protein_coding	- && Q3SWX2.1 RecName: Full=Acyl-coenzyme A thioesterase 9, mitochondrial; Short=Acyl-CoA thioesterase 9; AltName: Full=Acyl-CoA thioester hydrolase 9; Flags: Precursor && -	-
FBgn0041150	468.999	554.207	312.224	163.768	511.603	237.996	1.10378	0.00378874	0.0944088	hoe1	2L	4908581	4932384	-	4630	protein_coding	- && Q8MIQ9.3 RecName: Full=P protein; AltName: Full=Melanocyte-specific transporter protein; AltName: Full=Pink-eyed dilution protein homolog && PF03600:Citrate transporter	-
FBgn0034703	33.4999	35.644	62.2617	182.273	34.572	122.267	-1.82254	0.00382258	0.0949931	CG3045	2R	22172803	22174691	-	1663	protein_coding	- && Q9BZE2.3 RecName: Full=tRNA pseudouridine(38/39) synthase; AltName: Full=tRNA pseudouridine synthase 3; AltName: Full=tRNA pseudouridylate synthase 3; AltName: Full=tRNA-uridine isomerase 3 && PF01416:tRNA pseudouridine synthase	-
FBgn0033981	260.671	378.286	137.342	171.17	319.479	154.256	1.04978	0.00384375	0.0952603	Cyp6a21	2R	14885264	14886947	-	1631	protein_coding	- && Q9V774.1 RecName: Full=Probable cytochrome P450 6a21; AltName: Full=CYPVIA21 && PF00067:Cytochrome P450	p450
FBgn0265541	57.578	128.778	31.1308	21.2806	93.1782	26.2057	1.82818	0.00387305	0.0957096	CR44391	2R	17135595	17136325	+	731	pseudogene	- && - && -	-
FBgn0013679	48337.3	71044.2	30577.8	37968.3	59690.8	34273.1	0.800427	0.00388718	0.0957096	mt:ND1	mitochondrion_genome	11721	12659	-	939	protein_coding	- && P51937.1 RecName: Full=NADH-ubiquinone oxidoreductase chain 1; AltName: Full=NADH dehydrogenase subunit 1 (mitochondrion) [Drosophila subobscura] && -	-
FBgn0015577	1044.78	1144.06	624.448	705.961	1094.42	665.204	0.718212	0.00389327	0.0957096	alpha-Est9	3R	7493921	7505098	-	3455	protein_coding	- && P16854.1 RecName: Full=Esterase B1; Flags: Precursor && PF00135:Carboxylesterase family	COesterase
FBgn0263830	336.046	591.001	197.772	241.489	463.523	219.63	1.07695	0.00399828	0.0980274	CG40486	X	22958856	22960091	-	960	protein_coding	- && D2WKD9.2 RecName: Full=Farnesol dehydrogenase; AltName: Full=NADP+-dependent farnesol dehydrogenase 1; Short=AaSDR-1 && PF00106:short chain dehydrogenase	adh_short
FBgn0082585	248.109	195.467	408.363	412.659	221.788	410.511	-0.887394	0.00401411	0.0981525	sprt	2R	11384743	11397432	-	2795	protein_coding	- && - && -	-
FBgn0052687	19892.7	14878.5	9210.15	11481.3	17385.6	10345.7	0.748875	0.00406244	0.0988336	CG32687	X	10482028	10487205	-	2803	protein_coding	- && Q32NT4.1 RecName: Full=Leucine-rich repeat-containing protein 58 && PF13855:Leucine rich repeat	-
FBgn0003733	1315.92	992.283	448.65	741.12	1154.1	594.885	0.95631	0.00406358	0.0988336	tor	2R	7705183	7709184	-	3131	protein_coding	- && P18475.2 RecName: Full=Tyrosine-protein kinase receptor torso; Flags: Precursor && PF07714:Protein tyrosine kinase	Pkinase_Tyr
FBgn0002525	321.39	348.391	548.452	606.96	334.891	577.706	-0.78687	0.0040764	0.0988825	Lam	2L	5542480	5546642	+	3737	protein_coding	- && P08928.4 RecName: Full=Lamin Dm0; Flags: Precursor && PF00038:Intermediate filament protein|PF00932:Lamin Tail Domain	Filament
FBgn0039817	19.8906	50.5915	6.40929	2.77573	35.241	4.59251	2.9367	0.00422312	0.102171	CG15553	3R	31098868	31101169	-	1784	protein_coding	- && - && PF07690:Major Facilitator Superfamily	MFS_1
FBgn0016122	4494.23	8386.69	3142.38	3582.54	6440.46	3362.46	0.937579	0.00424107	0.102334	Acer	2L	8521933	8525740	+	3198	protein_coding	- && Q9VLJ6.1 RecName: Full=Angiotensin-converting enzyme-related protein; Flags: Precursor && PF01401:Angiotensin-converting enzyme	Peptidase_M2
FBgn0037446	280.562	254.107	469.709	469.099	267.335	469.404	-0.811839	0.00426329	0.102599	Zif	3R	6457088	6458822	+	1515	protein_coding	- && - && PF07776:Zinc-finger associated domain (zf-AD)	zf-AD
FBgn0001978	931.717	985.384	1324.89	2258.52	958.551	1791.71	-0.902431	0.00428105	0.102746	stc	2L	15113480	15118069	+	4145	protein_coding	- && P40798.2 RecName: Full=Protein shuttle craft && PF01422:NF-X1 type zinc finger|PF01424:R3H domain	R3H
FBgn0038462	321.39	316.197	186.785	92.5244	318.793	139.655	1.19058	0.00429604	0.102746	CG17556	3R	16994542	16996071	-	1230	protein_coding	- && Q5M7J9.1 RecName: Full=ER membrane protein complex subunit 2; AltName: Full=Tetratricopeptide repeat protein 35; Short=TPR repeat protein 35 && PF13414:TPR repeat	-
FBgn0086708	5585.07	3205.66	1416.45	2710.04	4395.36	2063.25	1.09115	0.00430913	0.102746	stv	3L	13477541	13483515	+	3670	protein_coding	- && Q9BLJ6.1 RecName: Full=BAG domain-containing protein Samui && PF02179:BAG domain	-
FBgn0283682	366.406	400.133	600.642	723.541	383.269	662.091	-0.788873	0.00431433	0.102746	Ge-1	2L	11095150	11100888	-	4932	protein_coding	- && Q9VKK1.2 RecName: Full=Enhancer of mRNA-decapping protein 4 homolog && PF16529:WD40 region of Ge1, enhancer of mRNA-decapping protein	-
FBgn0002780	2288.47	1851.19	3027.93	3897.13	2069.83	3462.53	-0.742193	0.0043346	0.102961	mod	3R	32052060	32054974	+	2287	protein_coding	- && P13469.2 RecName: Full=DNA-binding protein modulo && PF00076:RNA recognition motif. (a.k.a. RRM, RBD, or RNP domain)	RRM_1
FBgn0284243	3109.21	3572.45	6501.77	4703.94	3340.83	5602.85	-0.746008	0.00436451	0.103286	betaTub56D	2R	19447319	19451600	-	1869	protein_coding	- && Q27U48.1 RecName: Full=Tubulin beta-1 chain; AltName: Full=Beta-1-tubulin && PF00091:Tubulin/FtsZ family, GTPase domain|PF03953:Tubulin C-terminal domain	Tubulin
FBgn0034513	97.3592	177.07	45.7806	55.5146	137.215	50.6476	1.43663	0.00437088	0.103286	CG13423	2R	20536578	20538264	+	1626	protein_coding	- && Q8R016.1 RecName: Full=Bleomycin hydrolase; Short=BH; Short=BLM hydrolase; Short=BMH && PF03051:Peptidase C1-like family	-
FBgn0032705	20.9375	10.3483	119.03	34.234	15.6429	76.6318	-2.2879	0.00439771	0.103293	Grip71	2L	18708846	18711297	+	2276	protein_coding	- && - && -	-
FBgn0031298	3868.2	3440.22	2189.23	2465.77	3654.21	2327.5	0.650831	0.00441077	0.103293	Atg4a	2L	1080911	1085380	+	4078	protein_coding	- && Q640G7.1 RecName: Full=Cysteine protease ATG4B; AltName: Full=Autophagy-related protein 4 homolog B && PF03416:Peptidase family C54	-
FBgn0261286	184.25	163.273	242.637	622.689	173.761	432.663	-1.31582	0.00441598	0.103293	Mat89Ba	3R	16268329	16272415	-	3797	protein_coding	- && Q8IH00.1 RecName: Full=Nucleolar protein 6; AltName: Full=Maternal transcript 89Ba && PF03813:Nrap protein	-
FBgn0026401	650.108	639.292	1498.86	906.739	644.7	1202.8	-0.899705	0.00442644	0.103293	Nipped-B	2R	4691672	4729017	-	6711	protein_coding	- && Q7PLI2.3 RecName: Full=Nipped-B protein; AltName: Full=SCC2 homolog && PF12765:HEAT repeat associated with sister chromatid cohesion|PF12830:Sister chromatid cohesion C-terminus	-
FBgn0033774	6.28124	2.29961	41.2026	24.9816	4.29043	33.0921	-2.93472	0.00442765	0.103293	CG12374	2R	12762113	12763825	+	1464	protein_coding	- && O02350.3 RecName: Full=Zinc carboxypeptidase A 1; AltName: Full=AgCP; Flags: Precursor && PF02244:Carboxypeptidase activation peptide|PF00246:Zinc carboxypeptidase	-
FBgn0053080	4304.74	5578.86	2551.81	3304.04	4941.8	2927.93	0.755108	0.00444098	0.10334	CG33080	X	5708559	5717778	-	3705	protein_coding	- && Q69ZQ1.2 RecName: Full=Uncharacterized family 31 glucosidase KIAA1161 && PF01055:Glycosyl hydrolases family 31	Glyco_hydro_31
FBgn0003483	11.5156	4.59923	105.295	15.7291	8.05742	60.5123	-2.90204	0.00449736	0.104387	spn-E	3R	15837419	15844415	+	4678	protein_coding	- && Q9VF26.1 RecName: Full=Probable ATP-dependent RNA helicase spindle-E; AltName: Full=Homeless && PF00567:Tudor domain|PF04408:Helicase associated domain (HA2)|PF00271:Helicase conserved C-terminal domain|PF00270:DEAD/DEAH box helicase	Helicase_C
FBgn0051694	2305.22	1988.02	2538.99	7676.75	2146.62	5107.87	-1.25062	0.00453073	0.104895	CG31694	2L	2868627	2874489	-	2639	protein_coding	- && Q12894.3 RecName: Full=Interferon-related developmental regulator 2; AltName: Full=Protein SKMC15 && PF05004:Interferon-related developmental regulator (IFRD)|PF04836:Interferon-related protein conserved region	-
FBgn0015929	48.1562	37.9436	190.447	77.7205	43.0499	134.084	-1.638	0.00459026	0.106005	dpa	2R	7496702	7500145	-	3071	protein_coding	- && Q26454.2 RecName: Full=DNA replication licensing factor MCM4; AltName: Full=Protein disc proliferation abnormal && PF14551:MCM N-terminal domain|PF00493:MCM2/3/5 family	MCM
FBgn0036363	0	0	10.9874	14.8039	0	12.8956	-5.99766	0.00462502	1	CG10140	3L	13439317	13440470	-	969	protein_coding	- && - && PF01607:Chitin binding Peritrophin-A domain	CBM_14
FBgn0034514	19.8906	39.0934	4.57806	2.77573	29.492	3.6769	3.00115	0.00463363	0.106362	CG13427	2R	20538877	20539316	-	440	protein_coding	- && - && -	-
FBgn0015391	36.6406	36.7938	166.642	68.468	36.7172	117.555	-1.67899	0.00463747	0.106362	glu	2L	16733617	16738388	-	4521	protein_coding	- && Q8CG47.1 RecName: Full=Structural maintenance of chromosomes protein 4; Short=SMC protein 4; Short=SMC-4; AltName: Full=Chromosome-associated polypeptide C; AltName: Full=XCAP-C homolog && PF02463:RecF/RecN/SMC N terminal domain|PF06470:SMC proteins Flexible Hinge Domain	SMC_N
FBgn0036486	13.6094	22.9961	124.523	37.935	18.3027	81.2292	-2.15357	0.00464062	0.106362	Msh6	3L	15154233	15158562	-	4080	protein_coding	- && Q9VUM0.2 RecName: Full=Probable DNA mismatch repair protein Msh6 && PF05188:MutS domain II|PF00488:MutS domain V|PF05190:MutS family domain IV|PF01624:MutS domain I|PF05192:MutS domain III	-
FBgn0033928	81.6561	110.381	247.215	1124.17	96.0188	685.693	-2.8364	0.00468096	0.106609	Arc2	2R	14361924	14362825	+	902	protein_coding	- && - && -	-
FBgn0027620	151.797	159.823	418.435	244.264	155.81	331.35	-1.08882	0.00470374	0.106609	Acf	3R	31793981	31799799	+	5079	protein_coding	- && Q9NRL2.2 RecName: Full=Bromodomain adjacent to zinc finger domain protein 1A; AltName: Full=ATP-dependent chromatin-remodeling protein; AltName: Full=ATP-utilizing chromatin assembly and remodeling factor 1; Short=hACF1; AltName: Full=CHRAC subunit ACF1; AltName: Full=Williams syndrome transcription factor-related chromatin-remodeling factor 180; Short=WCRF180; AltName: Full=hWALp1 && PF0062…	Bromodomain
FBgn0052409	221.937	189.718	299.405	619.913	205.828	459.659	-1.15872	0.00470486	0.106609	CG32409	3L	5899528	5900936	+	1231	protein_coding	- && Q2KIH4.1 RecName: Full=Ribosome biogenesis regulatory protein homolog && PF04939:Ribosome biogenesis regulatory protein (RRS1)	-
FBgn0033246	81314.8	97565.7	50726.8	61572.2	89440.3	56149.5	0.671649	0.0047089	0.106609	ACC	2R	7974115	7991862	-	9067	protein_coding	- && P11029.1 RecName: Full=Acetyl-CoA carboxylase; Short=ACC; Includes: RecName: Full=Biotin carboxylase && PF00364:Biotin-requiring enzyme|PF02786:Carbamoyl-phosphate synthase L chain, ATP binding domain|PF02785:Biotin carboxylase C-terminal domain|PF08326:Acetyl-CoA carboxylase, central region|PF00289:Carbamoyl-phosphate synthase L chain, N-terminal domain|PF01039:Carboxyl transferase domain	Carboxyl_trans
FBgn0026428	21165.7	20606.8	9010.55	14691.9	20886.3	11851.2	0.81752	0.0047097	0.106609	HDAC6	X	15333310	15340360	+	5251	protein_coding	- && Q9UBN7.2 RecName: Full=Histone deacetylase 6; Short=HD6 && PF00850:Histone deacetylase domain|PF02148:Zn-finger in ubiquitin-hydrolases and other protein	Hist_deacetyl
FBgn0037057	2737.57	3175.77	1920.04	1858.81	2956.67	1889.43	0.645947	0.00473587	0.106937	CG10512	3L	21202920	21208092	+	2394	protein_coding	- && O59028.1 RecName: Full=Malate dehydrogenase && PF02615:Malate/L-lactate dehydrogenase	-
FBgn0030710	8.37499	1.14981	72.3334	16.6544	4.7624	44.4939	-3.20797	0.00474799	0.106947	CG8924	X	15941077	15944449	+	2575	protein_coding	- && Q9W0K4.2 RecName: Full=Protein bric-a-brac 2 && PF00651:BTB/POZ domain	BTB
FBgn0022069	350.703	371.388	508.165	960.403	361.045	734.284	-1.0242	0.00479172	0.107637	Nnp-1	2L	13363308	13366189	-	2882	protein_coding	- && Q9VJZ7.1 RecName: Full=Ribosomal RNA processing protein 1 homolog; AltName: Full=NNP-1 homolog; AltName: Full=RRP1-like protein && PF05997:Nucleolar protein,Nop52	-
FBgn0038952	75.3749	85.0857	22.8903	30.533	80.2303	26.7117	1.58651	0.00480967	0.107637	CG7069	3R	22372835	22375579	+	2693	protein_coding	- && O62619.2 RecName: Full=Pyruvate kinase; Short=PK && PF02887:Pyruvate kinase, alpha/beta domain|PF00224:Pyruvate kinase, barrel domain	PK
FBgn0015926	7.32811	1.14981	125.439	2.77573	4.23896	64.1073	-3.90676	0.00481396	0.107637	dah	X	15328342	15331002	+	2353	protein_coding	- && - && PF09068:EF hand|PF00569:Zinc finger, ZZ type	ZZ
FBgn0038853	256.484	243.759	438.579	436.715	250.121	437.647	-0.806953	0.00482654	0.107655	RhoGAP93B	3R	21083043	21097827	-	5353	protein_coding	- && Q9C0H5.2 RecName: Full=Rho GTPase-activating protein 39 && PF00784:MyTH4 domain|PF00620:RhoGAP domain|PF00397:WW domain	RhoGAP
FBgn0002719	38418.2	53494.8	30471.6	23529.9	45956.5	27000.7	0.76726	0.00484161	0.107693	Men	3R	12713103	12722442	-	3074	protein_coding	- && P28227.1 RecName: Full=NADP-dependent malic enzyme; Short=NADP-ME && PF00390:Malic enzyme, N-terminal domain|PF03949:Malic enzyme, NAD binding domain	Malic_M
FBgn0039251	2.09375	0	56.768	3.70097	1.04687	30.2345	-4.81632	0.00485176	0.107693	Trf4-2	3R	24925216	24927085	+	1870	protein_coding	- && Q5XG87.3 RecName: Full=Non-canonical poly(A) RNA polymerase PAPD7; AltName: Full=DNA polymerase sigma; AltName: Full=LAK-1; AltName: Full=PAP-associated domain-containing protein 7; AltName: Full=TRAMP-like complex polyadenylate polymerase; AltName: Full=Terminal uridylyltransferase 5; Short=TUTase 5; AltName: Full=Topoisomerase-related function protein 4-1; Short=TRF4-1 && PF01909:Nucleotid…	NTP_transf_2
FBgn0264848	101.547	105.782	225.241	197.077	103.664	211.159	-1.02666	0.00488405	0.108147	vih	3L	12504292	12505821	+	1464	protein_coding	- && Q9VTY6.1 RecName: Full=Ubiquitin-conjugating enzyme E2 C; AltName: Full=(E3-independent) E2 ubiquitin-conjugating enzyme C; AltName: Full=E2 ubiquitin-conjugating enzyme C; AltName: Full=Ubiquitin carrier protein C; AltName: Full=Ubiquitin carrier protein vihar; AltName: Full=Ubiquitin-protein ligase C && PF00179:Ubiquitin-conjugating enzyme	UQ_con
FBgn0035918	18.8437	14.9475	124.523	32.3835	16.8956	78.4534	-2.21382	0.00492389	0.108766	Cdc6	3L	8631509	8634069	-	2483	protein_coding	- && Q99741.1 RecName: Full=Cell division control protein 6 homolog; AltName: Full=CDC6-related protein; AltName: Full=Cdc18-related protein; Short=HsCdc18; AltName: Full=p62(cdc6); Short=HsCDC6 && PF13401:AAA domain|PF09079:CDC6, C terminal	-
FBgn0052485	770.499	587.551	404.701	371.948	679.025	388.324	0.806557	0.00501346	0.109969	CG32485	3L	3050323	3051765	+	1136	protein_coding	- && - && PF00650:CRAL/TRIO domain	-
FBgn0029672	190.531	173.621	293.912	412.659	182.076	353.285	-0.955903	0.00501358	0.109969	CG2875	X	3571456	3573622	-	1978	protein_coding	- && Q6NU91.1 RecName: Full=Nucleolar complex protein 4 homolog B; Short=NOC4 protein homolog B; AltName: Full=NOC4-like protein B; AltName: Full=Nucleolar complex-associated protein 4-like protein B [Xenopus laevis] && PF03914:CBF/Mak21 family|PF00858:Amiloride-sensitive sodium channel	CBF
FBgn0053217	71.1874	86.2355	174.882	166.544	78.7114	170.713	-1.11806	0.00502456	0.109969	CG33217	3L	23126025	23132209	+	2227	protein_coding	- && - && -	-
FBgn0037396	160.172	439.226	132.764	84.1972	299.699	108.481	1.46507	0.00502761	0.109969	CG11459	3R	6025826	6027238	-	1413	protein_coding	- && Q26636.1 RecName: Full=Cathepsin L; Contains: RecName: Full=Cathepsin L heavy chain; Contains: RecName: Full=Cathepsin L light chain; Flags: Precursor && PF08246:Cathepsin propeptide inhibitor domain (I29)|PF00112:Papain family cysteine protease	Peptidase_C1
FBgn0039151	2101.07	4261.18	1069.44	1874.54	3181.13	1471.99	1.11168	0.00503848	0.109969	CG13607	3R	24114043	24116322	-	2212	protein_coding	- && - && -	-
FBgn0051690	16.75	6.89884	20.1435	129.534	11.8244	74.8388	-2.65633	0.00507056	0.110159	CG31690	2L	2677734	2719431	+	3248	protein_coding	- && Q9VQE9.3 RecName: Full=Transmembrane and TPR repeat-containing protein CG31690 && PF08409:Domain of unknown function (DUF1736)|PF13414:TPR repeat	-
FBgn0259711	54.4374	67.8386	157.485	1496.12	61.138	826.802	-3.75754	0.00507127	0.110159	CG42365	2R	21666687	21667594	+	908	protein_coding	- && - && -	-
FBgn0250815	4.18749	1.14981	7.3249	63.8418	2.66865	35.5834	-3.72179	0.00512424	0.111046	Jon65Aiv	3L	6039155	6040135	+	904	protein_coding	- && P17205.2 RecName: Full=Serine proteases 1/2; AltName: Full=Protein Jonah 99Cii/99Ciii; Flags: Precursor && PF00089:Trypsin	Trypsin
FBgn0027106	15.7031	12.6479	47.6119	61.9913	14.1755	54.8016	-1.9486	0.00518699	0.112006	Inx7	X	6991612	6993612	-	1634	protein_coding	- && Q9V3W6.1 RecName: Full=Innexin inx7; Short=Innexin-7; AltName: Full=Gap junction protein prp7; AltName: Full=Pas-related protein 7 && PF00876:Innexin	-
FBgn0037205	0	0	27.4684	2.77573	0	15.1221	-6.22776	0.00519306	0.112006	BoYb	3L	22901912	22905470	+	3559	protein_coding	- && Q9VNP5.1 RecName: Full=Putative ATP-dependent RNA helicase BoYb; AltName: Full=Brother of Yb && -	-
FBgn0286071	392.578	827.861	255.456	307.181	610.219	281.318	1.11658	0.00524939	0.112954	AdamTS-A	3R	15442246	15476193	-	7745	protein_coding	- && Q9P2N4.4 RecName: Full=A disintegrin and metalloproteinase with thrombospondin motifs 9; Short=ADAM-TS 9; Short=ADAM-TS9; Short=ADAMTS-9; Flags: Precursor && PF13688:Metallo-peptidase family M12|PF05986:ADAM-TS Spacer 1|PF01562:Reprolysin family propeptide|PF00090:Thrombospondin type 1 domain|PF08685:GON domain	TSP_1
FBgn0035298	5143.29	4385.36	2662.6	3285.54	4764.33	2974.07	0.679884	0.00527781	0.113202	SCOT	3L	1963143	1966805	+	2355	protein_coding	- && P55809.1 RecName: Full=Succinyl-CoA:3-ketoacid coenzyme A transferase 1, mitochondrial; AltName: Full=3-oxoacid CoA-transferase 1; AltName: Full=Somatic-type succinyl-CoA:3-oxoacid CoA-transferase; Short=SCOT-s; Flags: Precursor && PF01144:Coenzyme A transferase	-
FBgn0052475	348.609	104.632	508.165	694.858	226.621	601.512	-1.40688	0.00529789	0.113202	mthl8	3L	22428	26308	+	3413	protein_coding	- && Q9W0V7.2 RecName: Full=Probable G-protein coupled receptor Mth-like 8; AltName: Full=Protein methuselah-like 8; Flags: Precursor && PF06652:Methuselah N-terminus	-
FBgn0026702	164.359	223.062	298.49	528.314	193.711	413.402	-1.09434	0.00529801	0.113202	l(1)G0045	X	5622648	5625493	+	2779	protein_coding	- && Q99575.2 RecName: Full=Ribonucleases P/MRP protein subunit POP1; Short=hPOP1 && PF08170:POPLD (NUC188) domain|PF06978:Ribonucleases P/MRP protein subunit POP1	-
FBgn0036381	812.374	1124.51	232.566	600.483	968.442	416.524	1.21721	0.00532309	0.113246	CG8745	3L	13860027	13866905	-	2429	protein_coding	- && Q9VU95.2 RecName: Full=Alanine--glyoxylate aminotransferase 2-like && PF00202:Aminotransferase class-III	Aminotran_3
FBgn0038353	487.843	400.133	732.49	761.476	443.988	746.983	-0.750084	0.00533234	0.113246	CG5399	3R	15695241	15697142	+	1546	protein_coding	- && - && -	-
FBgn0033979	50.2499	51.7413	390.051	49.9632	50.9956	220.007	-2.10927	0.00533726	0.113246	Cyp6a19	2R	14877786	14879752	+	1913	protein_coding	- && P82711.1 RecName: Full=Probable cytochrome P450 6a19; AltName: Full=CYPVIA19 && PF00067:Cytochrome P450	p450
FBgn0039807	254.39	190.868	104.38	111.954	222.629	108.167	1.04214	0.00535755	0.113414	CG15546	3R	30874365	30876186	-	1822	protein_coding	- && - && -	-
FBgn0020513	109019	70201.4	51192.8	53817.7	89610.4	52505.3	0.771207	0.00540128	0.114076	Paics	X	12757036	12760617	-	2550	protein_coding	- && Q9I7S8.2 RecName: Full=Multifunctional protein ADE2; AltName: Full=Protein adenosine-5; Includes: RecName: Full=Phosphoribosylaminoimidazole-succinocarboxamide synthase; AltName: Full=SAICAR synthetase; Includes: RecName: Full=Phosphoribosylaminoimidazole carboxylase; AltName: Full=AIR carboxylase; Short=AIRC && PF00731:AIR carboxylase|PF01259:SAICAR synthetase	-
FBgn0033888	57.578	82.7861	13.7342	25.9068	70.1821	19.8205	1.8236	0.0054145	0.114091	CG18568	2R	13971325	13972834	-	1510	protein_coding	- && - && -	-
FBgn0038989	224.031	217.313	339.692	504.258	220.672	421.975	-0.935101	0.00544608	0.114493	CG6937	3R	22584773	22586209	+	1307	protein_coding	- && Q8JIY8.2 RecName: Full=MKI67 FHA domain-interacting nucleolar phosphoprotein; AltName: Full=Nucleolar phosphoprotein NOPP34-like protein && PF00076:RNA recognition motif. (a.k.a. RRM, RBD, or RNP domain)	RRM_1
FBgn0010482	1640.45	2175.43	1273.62	734.643	1907.94	1004.13	0.925933	0.00549023	0.115093	l(2)01289	2R	6721101	6740672	-	9515	protein_coding	- && - && PF13848:Thioredoxin-like domain|PF00085:Thioredoxin	-
FBgn0020236	23492.9	41087.2	17737.3	18141.3	32290	17939.3	0.847955	0.00550143	0.115093	ATPCL	2R	15993531	16001290	-	4339	protein_coding	- && Q91V92.1 RecName: Full=ATP-citrate synthase; AltName: Full=ATP-citrate (pro-S-)-lyase; AltName: Full=Citrate cleavage enzyme && PF00285:Citrate synthase|PF00549:CoA-ligase|PF08442:ATP-grasp domain|PF02629:CoA binding domain|PF16114:ATP citrate lyase citrate-binding	Citrate_synt
FBgn0031392	305.687	351.841	544.79	575.502	328.764	560.146	-0.769161	0.00551238	0.115093	AIF	2L	2151754	2155389	+	2993	protein_coding	- && Q9VQ79.2 RecName: Full=Putative apoptosis-inducing factor 1, mitochondrial; Short=DmAIF; Flags: Precursor && PF07992:Pyridine nucleotide-disulphide oxidoreductase|PF14721:Apoptosis-inducing factor, mitochondrion-associated, C-term	Pyr_redox_2
FBgn0004403	25581.4	28538.2	17756.5	18228.2	27059.8	17992.4	0.58876	0.00558943	0.116436	RpS14a	X	7933742	7934677	+	877	protein_coding	- && P14130.1 RecName: Full=40S ribosomal protein S14 >Q6XI08.1 RecName: Full=40S ribosomal protein S14a && PF00411:Ribosomal protein S11	-
FBgn0015570	1103.4	1591.33	715.094	833.645	1347.37	774.369	0.798817	0.00564505	0.117327	alpha-Est2	3R	7541810	7545230	+	2141	protein_coding	- && P16854.1 RecName: Full=Esterase B1; Flags: Precursor && PF00135:Carboxylesterase family	COesterase
FBgn0030864	1.04687	9.19845	113.536	6.47671	5.12266	60.0064	-3.56331	0.00566935	0.117565	CG8173	X	17707401	17709653	-	1643	protein_coding	- && Q96KB5.3 RecName: Full=Lymphokine-activated killer T-cell-originated protein kinase; AltName: Full=Cancer/testis antigen 84; Short=CT84; AltName: Full=MAPKK-like protein kinase; AltName: Full=Nori-3; AltName: Full=PDZ-binding kinase; AltName: Full=Spermatogenesis-related protein kinase; Short=SPK; AltName: Full=T-LAK cell-originated protein kinase && PF00069:Protein kinase domain	Pkinase
FBgn0266410	1547.28	981.935	3932.56	1661.74	1264.61	2797.15	-1.14512	0.00570395	0.118015	CG45050	3R	9340216	9362994	+	8254	protein_coding	- && Q6FIF0.2 RecName: Full=AN1-type zinc finger protein 6; AltName: Full=Associated with PRK1 protein; AltName: Full=Zinc finger A20 domain-containing protein 3 && PF01754:A20-like zinc finger|PF01428:AN1-like Zinc finger	zf-A20
FBgn0035790	53.3905	57.4903	18.3123	11.1029	55.4404	14.7076	1.91368	0.0057417	0.118528	Cyp316a1	3L	7491864	7493484	+	1455	protein_coding	- && Q9VS78.3 RecName: Full=Probable cytochrome P450 316a1; AltName: Full=CYPCCCXVIA1 && PF00067:Cytochrome P450	p450
FBgn0027086	2053.97	2011.01	3235.78	2967.26	2032.49	3101.52	-0.609714	0.00576013	0.11864	IleRS	3L	22288665	22292810	+	3899	protein_coding	- && Q8BU30.2 RecName: Full=Isoleucine--tRNA ligase, cytoplasmic; AltName: Full=Isoleucyl-tRNA synthetase; Short=IRS; Short=IleRS && PF08264:Anticodon-binding domain of tRNA|PF00133:tRNA synthetases class I (I, L, M and V)	-
FBgn0033507	65.953	63.2394	119.945	186.899	64.5962	153.422	-1.24765	0.00586519	0.119892	CG12909	2R	10310113	10311143	+	1031	protein_coding	- && Q08288.2 RecName: Full=Cell growth-regulating nucleolar protein; AltName: Full=Protein expressed in male leptotene and zygotene spermatocytes 264; Short=MLZ-264 && PF08790:LYAR-type C2HC zinc finger	-
FBgn0028744	518.202	378.286	624.448	1231.5	448.244	927.974	-1.0494	0.00586687	0.119892	CG5033	2R	17789679	17792448	+	2514	protein_coding	- && Q7K0Y1.1 RecName: Full=Ribosome biogenesis protein BOP1 homolog && PF08145:BOP1NT (NUC169) domain|PF00400:WD domain, G-beta repeat	WD40
FBgn0028480	16480.9	23853.9	11714.4	12684.2	20167.4	12199.3	0.725212	0.00589623	0.119892	CG17841	X	10368052	10384183	+	3091	protein_coding	- && - && PF03798:TLC domain	LAG1
FBgn0042173	2.09375	2.29961	21.0591	24.9816	2.19668	23.0203	-3.39111	0.00591149	0.119892	CG18853	2R	7829062	7830429	+	1157	protein_coding	- && Q28811.1 RecName: Full=Deoxyribodipyrimidine photo-lyase; AltName: Full=DNA photolyase; AltName: Full=Photoreactivating enzyme && PF01980:Uncharacterised protein family UPF0066	-
FBgn0026147	318.249	306.998	460.553	693.933	312.624	577.243	-0.884616	0.00591973	0.119892	TTLL4A	2L	10989401	10997897	+	7646	protein_coding	- && Q14679.2 RecName: Full=Tubulin polyglutamylase TTLL4; AltName: Full=Tubulin--tyrosine ligase-like protein 4 && PF03133:Tubulin-tyrosine ligase family	TTL
FBgn0285926	136.094	82.7861	443.157	159.142	109.44	301.149	-1.45923	0.00593688	0.119892	Imp	X	10787869	10824277	-	13650	protein_coding	- && O42254.1 RecName: Full=Insulin-like growth factor 2 mRNA-binding protein 1; Short=IGF2 mRNA-binding protein 1; Short=IMP-1; AltName: Full=IGF-II mRNA-binding protein 1; AltName: Full=VICKZ family member 1; AltName: Full=Zip-code binding polypeptide; AltName: Full=Zipcode-binding protein 1; Short=ZBP-1 && PF00013:KH domain	KH_1
FBgn0030013	11342.9	9104.17	24730.7	13441.9	10223.5	19086.3	-0.900634	0.00596544	0.119892	GIIIspla2	X	8157628	8159348	+	1543	protein_coding	- && - && PF05826:Phospholipase A2	-
FBgn0030086	927.53	1169.35	1677.4	1697.82	1048.44	1687.61	-0.687007	0.00597319	0.119892	CCT2	X	9089513	9092826	+	2121	protein_coding	- && Q3ZBH0.3 RecName: Full=T-complex protein 1 subunit beta; Short=TCP-1-beta; AltName: Full=CCT-beta && PF00118:TCP-1/cpn60 chaperonin family	-
FBgn0032002	640.686	624.345	336.03	410.808	632.516	373.419	0.760397	0.00597975	0.119892	CG8353	2L	8214045	8215239	+	1011	protein_coding	- && P19079.1 RecName: Full=Cytidine deaminase; Short=CDA; AltName: Full=Cytidine aminohydrolase && PF00383:Cytidine and deoxycytidylate deaminase zinc-binding region	-
FBgn0030087	14281.4	11360.1	7732.35	8591.81	12820.8	8162.08	0.651499	0.005986	0.119892	CG7766	X	9093612	9103739	-	5177	protein_coding	- && Q9W391.2 RecName: Full=Probable phosphorylase b kinase regulatory subunit alpha; Short=Phosphorylase kinase subunit alpha && PF00723:Glycosyl hydrolases family 15	-
FBgn0036301	148.656	132.228	198.688	481.127	140.442	339.907	-1.27479	0.00598632	0.119892	CG4069	3L	12535426	12537315	-	1709	protein_coding	- && Q8TBB5.1 RecName: Full=Kelch domain-containing protein 4 && PF13415:Galactose oxidase, central domain|PF07646:Kelch motif	Kelch_2
FBgn0015270	2.09375	2.29961	56.768	5.55146	2.19668	31.1597	-3.8279	0.00598867	0.119892	Orc2	3R	13964885	13967075	+	1995	protein_coding	- && Q24168.2 RecName: Full=Origin recognition complex subunit 2; Short=DmORC2 && PF04084:Origin recognition complex subunit 2	-
FBgn0032934	1435.26	649.641	442.241	543.118	1042.45	492.68	1.08164	0.00599131	0.119892	CG8679	2L	21216004	21218544	-	2541	protein_coding	- && A8VU90.1 RecName: Full=Ankyrin repeat and LEM domain-containing protein 1; AltName: Full=Ankyrin repeat domain-containing protein 41; AltName: Full=LEM-domain containing protein 3 && PF03020:LEM domain|PF13857:Ankyrin repeats (many copies)	-
FBgn0031320	1077.23	1315.38	687.625	775.354	1196.31	731.49	0.7095	0.00600907	0.119985	CG5126	2L	1182297	1184020	-	1667	protein_coding	- && - && PF02958:Ecdysteroid kinase	-
FBgn0010352	25243.3	31742.7	18795.7	17831.3	28493	18313.5	0.637687	0.00603302	0.120084	Nc73EF	3L	16954822	16968724	+	5338	protein_coding	- && Q60HE2.1 RecName: Full=2-oxoglutarate dehydrogenase, mitochondrial; AltName: Full=2-oxoglutarate dehydrogenase complex component E1; Short=OGDC-E1; AltName: Full=Alpha-ketoglutarate dehydrogenase; Flags: Precursor && PF02779:Transketolase, pyrimidine binding domain|PF16870:2-oxoglutarate dehydrogenase C-terminal|PF00676:Dehydrogenase E1 component|PF16078:2-oxoglutarate dehydrogenase N-termin…	-
FBgn0016715	4819.8	5025.8	3272.4	3292.94	4922.8	3282.67	0.584596	0.0060403	0.120084	Reg-2	3L	605165	606569	-	883	protein_coding	- && Q94915.1 RecName: Full=Rhythmically expressed gene 2 protein; AltName: Full=dREG-2 && PF13419:Haloacid dehalogenase-like hydrolase	-
FBgn0003545	1.04687	0	58.5992	0.925244	0.523437	29.7622	-5.77236	0.00605629	0.120141	sub	2R	17745500	17748078	-	2460	protein_coding	- && Q9V877.1 RecName: Full=Kinesin-like protein subito; AltName: Full=Protein double or nothing && PF00225:Kinesin motor domain	Kinesin
FBgn0036272	233.453	296.65	513.659	435.79	265.051	474.724	-0.841567	0.00607777	0.120306	Sms	3L	12271656	12277251	-	2092	protein_coding	- && Q3SZA5.1 RecName: Full=Spermine synthase; Short=SPMSY; AltName: Full=Spermidine aminopropyltransferase && PF01564:Spermine/spermidine synthase	-
FBgn0042187	2.09375	0	325.958	8.32719	1.04687	167.143	-7.30106	0.00609997	0.120484	CG17234	2L	2253045	2253852	+	808	protein_coding	- && P54624.1 RecName: Full=Trypsin alpha; Flags: Precursor && PF00089:Trypsin	Trypsin
FBgn0265899	18.8437	26.4456	1.83123	2.77573	22.6446	2.30348	3.29693	0.00615328	0.121275	lncRNA:CR44688	3L	22896127	22896619	+	493	ncRNA	- && - && -	-
FBgn0010315	162.265	137.977	289.334	274.797	150.121	282.066	-0.909189	0.00616865	0.121317	CycD	X	15906822	15909676	-	2453	protein_coding	- && Q90459.1 RecName: Full=G1/S-specific cyclin-D1 && PF00134:Cyclin, N-terminal domain|PF02984:Cyclin, C-terminal domain	Cyclin_C
FBgn0266421	82.703	93.1343	154.739	230.386	87.9187	192.562	-1.13157	0.00625497	0.12275	RPA3	X	11615097	11615840	-	673	protein_coding	- && - && PF08661:Replication factor A protein 3	-
FBgn0001197	306.734	298.95	771.862	426.537	302.842	599.199	-0.984477	0.00631986	0.123758	His2Av	3R	26866929	26869220	+	1224	protein_coding	- && P08985.2 RecName: Full=Histone H2A.v; AltName: Full=H2A.F/Z; Short=H2A.Z && PF16211:C-terminus of histone H2A|PF00125:Core histone H2A/H2B/H3/H4	Histone
FBgn0034165	173.781	274.804	93.3925	113.805	224.292	103.599	1.1135	0.00648263	0.126458	CG6435	2R	16873772	16874977	+	794	protein_coding	- && - && PF05497:Destabilase	-
FBgn0038034	90.0311	59.7899	138.258	219.283	74.9105	178.77	-1.2529	0.0064854	0.126458	Cyp9f3	3R	12396007	12398929	-	2039	protein_coding	- && Q9VG82.1 RecName: Full=Probable cytochrome P450 9f2; AltName: Full=CYPIXF2 && PF00067:Cytochrome P450	p450
FBgn0283427	92453.6	122351	69588.4	66807.2	107402	68197.8	0.655223	0.00658186	0.128066	FASN1	2L	3056598	3068177	+	8744	protein_coding	- && P19096.2 RecName: Full=Fatty acid synthase; Includes: RecName: Full=[Acyl-carrier-protein] S-acetyltransferase; Includes: RecName: Full=[Acyl-carrier-protein] S-malonyltransferase; Includes: RecName: Full=3-oxoacyl-[acyl-carrier-protein] synthase; Includes: RecName: Full=3-oxoacyl-[acyl-carrier-protein] reductase; Includes: RecName: Full=3-hydroxyacyl-[acyl-carrier-protein] dehydratase; Incl…	Acyl_transf_1
FBgn0024289	38352.2	62411.5	27756.8	30635.7	50381.9	29196.3	0.787111	0.00668589	0.129615	Sodh-1	3R	7052335	7054541	+	1387	protein_coding	- && Q64442.3 RecName: Full=Sorbitol dehydrogenase; AltName: Full=L-iditol 2-dehydrogenase && PF00107:Zinc-binding dehydrogenase|PF08240:Alcohol dehydrogenase GroES-like domain	ADH_N
FBgn0032287	6027.9	6179.06	4093.71	4121.04	6103.48	4107.37	0.57141	0.00668981	0.129615	CG6415	2L	10703621	10704930	+	1254	protein_coding	- && P25285.1 RecName: Full=Aminomethyltransferase, mitochondrial; AltName: Full=Glycine cleavage system T protein; Short=GCVT; Flags: Precursor && PF08669:Glycine cleavage T-protein C-terminal barrel domain|PF01571:Aminomethyltransferase folate-binding domain	GCV_T
FBgn0052438	59.6718	54.0409	152.907	113.805	56.8563	133.356	-1.22936	0.0067072	0.129677	SMC5	3L	21569176	21573523	+	3368	protein_coding	- && Q8IY18.2 RecName: Full=Structural maintenance of chromosomes protein 5; Short=SMC protein 5; Short=SMC-5; Short=hSMC5 && PF02463:RecF/RecN/SMC N terminal domain	SMC_N
FBgn0039805	49.203	62.0896	7.3249	19.4301	55.6463	13.3775	2.05664	0.00674647	0.130049	Cpr100A	3R	30867521	30869184	+	1378	protein_coding	- && - && PF00379:Insect cuticle protein	Chitin_bind_4
FBgn0039527	150.75	139.127	71.4178	60.1408	144.938	65.7793	1.13988	0.00676128	0.130049	CG5639	3R	27586474	27596130	-	5099	protein_coding	- && P06882.4 RecName: Full=Thyroglobulin; Short=Tg; Flags: Precursor && PF00086:Thyroglobulin type-1 repeat|PF14625:Lustrin, cysteine-rich repeated domain|PF02822:Antistasin family|PF00095:WAP-type (Whey Acidic Protein) 'four-disulfide core'	-
FBgn0035227	1243.69	1314.23	1825.73	2187.28	1278.96	2006.5	-0.649762	0.00676911	0.130049	Iml1	3L	1523414	1534034	-	4923	protein_coding	- && P61460.2 RecName: Full=DEP domain-containing protein 5 && PF12257:Protein of unknown function (DUF3608)	-
FBgn0039233	92.1249	96.5838	153.823	271.096	94.3543	212.46	-1.17112	0.00679173	0.13021	CG7006	3R	24850627	24851385	+	708	protein_coding	- && A4QND5.1 RecName: Full=60S ribosome subunit biogenesis protein NIP7 homolog && PF03657:Uncharacterised protein family (UPF0113)	-
FBgn0035344	745.374	1267.09	1718.61	1915.25	1006.23	1816.93	-0.852937	0.00681381	0.13036	Cyp4d20	3L	2476259	2478448	-	1817	protein_coding	- && Q9W011.1 RecName: Full=Probable cytochrome P450 4d20; AltName: Full=CYPIVD20 && PF00067:Cytochrome P450	p450
FBgn0029879	11.5156	17.2471	125.439	23.1311	14.3814	74.285	-2.37163	0.00683984	0.130585	APC7	X	6597088	6599699	+	2312	protein_coding	- && Q9UJX3.4 RecName: Full=Anaphase-promoting complex subunit 7; Short=APC7; AltName: Full=Cyclosome subunit 7 && -	-
FBgn0039128	0	0	15.5654	8.32719	0	11.9463	-5.88755	0.0068484	1	CG13599	3R	23931639	23932728	+	1029	protein_coding	- && - && -	-
FBgn0037843	208.328	157.524	422.098	294.227	182.926	358.163	-0.968527	0.00687324	0.13095	CG4511	3R	10854501	10856412	+	1503	protein_coding	- && Q9CQ79.1 RecName: Full=Thioredoxin domain-containing protein 9; AltName: Full=ATP-binding protein associated with cell differentiation && PF02114:Phosducin	-
FBgn0037387	7970.89	13732.1	5424.09	6674.71	10851.5	6049.4	0.842996	0.00704853	0.13401	CG1213	3R	5841170	5846568	+	2356	protein_coding	- && A5LGM7.1 RecName: Full=Facilitated trehalose transporter Tret1; Short=PvTret1 && PF00083:Sugar (and other) transporter	Sugar_tr
FBgn0042102	2.09375	1.14981	23.8059	17.5796	1.62178	20.6928	-3.66262	0.00712416	0.134941	CG18745	3R	7783843	7786119	-	1567	protein_coding	- && - && PF00339:Arrestin (or S-antigen), N-terminal domain|PF02752:Arrestin (or S-antigen), C-terminal domain	-
FBgn0050035	9451.17	14125.4	4947.97	7966.35	11788.3	6457.16	0.86836	0.0071291	0.134941	Tret1-1	2R	11665768	11674782	+	3375	protein_coding	- && A1Z8N1.1 RecName: Full=Facilitated trehalose transporter Tret1-1; Short=DmTret1-1 && PF00083:Sugar (and other) transporter	Sugar_tr
FBgn0040309	2902.98	3726.52	4394.94	7710.98	3314.75	6052.96	-0.86879	0.00715377	0.134941	Jafrac1	X	13329824	13331994	+	1464	protein_coding	- && Q9V3P0.1 RecName: Full=Peroxiredoxin 1; AltName: Full=Cytosolic thioredoxin peroxidase; Short=DPx-4783; Short=DmTPx-1; AltName: Full=Thioredoxin peroxidase && PF10417:C-terminal domain of 1-Cys peroxiredoxin|PF00578:AhpC/TSA family	-
FBgn0031908	278.468	321.946	174.882	149.889	300.207	162.386	0.88612	0.00715651	0.134941	CG5177	2L	7405227	7408600	+	1123	protein_coding	- && Q9SU39.1 RecName: Full=Probable trehalose-phosphate phosphatase F; Short=AtTPPF; AltName: Full=Trehalose 6-phosphate phosphatase; AltName: Full=Trehalose-phosphate phosphatase 5 && PF02358:Trehalose-phosphatase	-
FBgn0284246	173.781	175.92	260.034	450.594	174.851	355.314	-1.02293	0.00721274	0.135616	l(2)k09848	2R	6074471	6076367	-	1778	protein_coding	- && - && -	-
FBgn0052512	1443.64	1572.94	943.081	1005.74	1508.29	974.411	0.630237	0.00722662	0.135616	CG32512	X	21062277	21067540	-	2507	protein_coding	- && - && PF13664:Domain of unknown function (DUF4149)	-
FBgn0003076	49862.6	77736.1	37759.9	38338.4	63799.3	38049.1	0.745671	0.00723679	0.135616	Pgm1	3L	16126018	16128531	-	1843	protein_coding	- && Q9VUY9.1 RecName: Full=Phosphoglucomutase; Short=PGM; AltName: Full=Glucose phosphomutase && PF02879:Phosphoglucomutase/phosphomannomutase, alpha/beta/alpha domain II|PF02878:Phosphoglucomutase/phosphomannomutase, alpha/beta/alpha domain I|PF02880:Phosphoglucomutase/phosphomannomutase, alpha/beta/alpha domain III|PF00408:Phosphoglucomutase/phosphomannomutase, C-terminal domain	PGM_PMM_III
FBgn0015625	8.37499	1.14981	363.498	17.5796	4.7624	190.539	-5.31637	0.00726433	0.135853	CycB3	3R	24867934	24870816	-	2883	protein_coding	- && Q9I7I0.1 RecName: Full=G2/mitotic-specific cyclin-B3 && PF02984:Cyclin, C-terminal domain|PF00134:Cyclin, N-terminal domain	Cyclin_C
FBgn0285896	119.344	157.524	29.2996	70.3185	138.434	49.8091	1.47456	0.00732145	0.136642	btl	3L	14075772	14083229	+	3968	protein_coding	- && Q09147.3 RecName: Full=Fibroblast growth factor receptor homolog 2; AltName: Full=Protein breathless; AltName: Full=Tyrosine kinase 2; Short=dTk2; AltName: Full=Tyrosine kinase receptor HD-311; AltName: Full=dFGF-R1; Flags: Precursor && PF07679:Immunoglobulin I-set domain|PF07714:Protein tyrosine kinase	Pkinase_Tyr
FBgn0022787	1370.36	1378.62	831.377	935.421	1374.49	883.399	0.637768	0.00734812	0.136796	Hel89B	3R	15973298	15983451	+	6581	protein_coding	- && O14981.2 RecName: Full=TATA-binding protein-associated factor 172; AltName: Full=ATP-dependent helicase BTAF1; AltName: Full=B-TFIID transcription factor-associated 170 kDa subunit; AltName: Full=TAF(II)170; AltName: Full=TBP-associated factor 172; Short=TAF-172 && PF12054:Domain of unknown function (DUF3535)|PF00271:Helicase conserved C-terminal domain|PF00176:SNF2 family N-terminal domain	SNF2_N
FBgn0284248	2343.95	2934.31	5179.62	3654.71	2639.13	4417.17	-0.743153	0.00735963	0.136796	Cyt-c-p	2L	16719932	16722644	+	681	protein_coding	- && P84029.2 RecName: Full=Cytochrome c-2; AltName: Full=Cytochrome c-proximal >P84030.2 RecName: Full=Cytochrome c-2 && PF00034:Cytochrome c	-
FBgn0034013	64.9061	105.782	27.4684	31.4583	85.3442	29.4633	1.53306	0.00738208	0.136805	unc-5	2R	15340472	15368300	+	5235	protein_coding	- && Q95TU8.1 RecName: Full=Netrin receptor unc-5; AltName: Full=Unc5 netrin receptor; Flags: Precursor && PF00531:Death domain|PF00791:ZU5 domain|PF07679:Immunoglobulin I-set domain	I-set
FBgn0033741	634.405	545.008	869.832	1075.13	589.707	972.483	-0.721383	0.00741069	0.136805	CG8545	2R	12468651	12471722	+	2949	protein_coding	- && P46087.2 RecName: Full=Probable 28S rRNA (cytosine(4447)-C(5))-methyltransferase; AltName: Full=Nucleolar protein 1; AltName: Full=Nucleolar protein 2 homolog; AltName: Full=Proliferating-cell nucleolar antigen p120; AltName: Full=Proliferation-associated nucleolar protein p120 && PF17125:N-terminal domain of 16S rRNA methyltransferase RsmF|PF01189:16S rRNA methyltransferase RsmF	-
FBgn0031305	6415.24	8758.08	4408.68	5014.82	7586.66	4711.75	0.687157	0.00742515	0.136805	Iris	2L	1132332	1134098	-	1767	protein_coding	- && - && PF12272:Protein of unknown function (DUF3610)|PF12259:Protein of unknown function (DUF3609)	-
FBgn0030160	6931.35	7479.49	4664.13	5001.87	7205.42	4833	0.576148	0.00743072	0.136805	CG9691	X	9884442	9885044	+	603	protein_coding	- && - && -	-
FBgn0038601	294.171	231.111	377.233	676.353	262.641	526.793	-1.00359	0.0074349	0.136805	CG18600	3R	18300195	18301728	-	1414	protein_coding	- && - && PF06870:A49-like RNA polymerase I associated factor	-
FBgn0050289	3.14062	3.44942	17.3966	36.0845	3.29502	26.7406	-3.02186	0.00746153	0.137019	CG30289	2R	21520413	21521848	-	1164	protein_coding	- && A0A126GUP6.1 RecName: Full=Melanization protease 1; Flags: Precursor && PF00089:Trypsin	Trypsin
FBgn0032470	217.75	234.561	351.595	459.846	226.155	405.721	-0.843373	0.00762577	0.139723	Ttc30	2L	13106807	13109468	+	2105	protein_coding	- && Q9VK41.3 RecName: Full=Tetratricopeptide repeat protein 30 homolog; Short=TPR repeat protein 30 homolog && PF13414:TPR repeat	-
FBgn0038083	66.9999	158.673	587.823	141.562	112.837	364.693	-1.69387	0.00764833	0.139723	Ugt37A3	3R	12741958	12743680	-	1667	protein_coding	- && Q1LZI1.1 RecName: Full=UDP-glucuronosyltransferase 3A1; Short=UDPGT 3A1; Flags: Precursor && PF00201:UDP-glucoronosyl and UDP-glucosyl transferase	UDPGT
FBgn0034817	945.327	908.347	388.22	638.418	926.837	513.319	0.852559	0.00765825	0.139723	Art7	2R	23076688	23079038	-	2230	protein_coding	- && Q9W1V1.4 RecName: Full=Protein arginine N-methyltransferase 7; Short=Dart7 && -	-
FBgn0003187	0	2.29961	66.8397	0.925244	1.14981	33.8825	-4.9129	0.00768887	0.139723	qua	2L	17486806	17497208	-	3792	protein_coding	- && Q23989.2 RecName: Full=Villin-like protein quail && PF02209:Villin headpiece domain	-
FBgn0024361	57.578	44.8425	98.8862	156.366	51.2102	127.626	-1.31586	0.00770996	0.139723	Tsp2A	X	1346553	1348143	+	1037	protein_coding	- && O46101.1 RecName: Full=Tetraspanin-2A && PF00335:Tetraspanin family	Tetraspannin
FBgn0031517	497.265	348.391	115.367	259.068	422.828	187.218	1.17584	0.00771132	0.139723	CG15406	2L	3309222	3311682	+	1646	protein_coding	- && B4P624.1 RecName: Full=Facilitated trehalose transporter Tret1 && PF00083:Sugar (and other) transporter	Sugar_tr
FBgn0037547	37914.6	42523.3	21409.8	29141.5	40219	25275.6	0.670126	0.00771823	0.139723	CG7910	3R	8087252	8089526	+	1976	protein_coding	- && Q05AM4.1 RecName: Full=Fatty-acid amide hydrolase 2-B && PF01425:Amidase	Amidase
FBgn0012034	57393.8	64574.3	41967.1	40312.9	60984	41140	0.567886	0.00773098	0.139723	AcCoAS	3L	21270722	21280243	-	3605	protein_coding	- && Q9VP61.1 RecName: Full=Acetyl-coenzyme A synthetase; AltName: Full=Acetate--CoA ligase; AltName: Full=Acetyl-CoA synthetase; Short=ACS; Short=AceCS; AltName: Full=Acyl-activating enzyme && PF00501:AMP-binding enzyme|PF16177:Acetyl-coenzyme A synthetase N-terminus|PF13193:AMP-binding enzyme C-terminal domain	AMP-binding
FBgn0037746	4.18749	4.59923	73.249	7.40195	4.39336	40.3255	-3.19951	0.00789169	0.142346	CG8478	3R	9763650	9766135	+	2281	protein_coding	- && - && -	-
FBgn0263755	33.4999	47.1421	75.9959	151.74	40.321	113.868	-1.49953	0.00792927	0.142743	Su(var)3-9	3R	15259864	15263458	-	2386	protein_coding	- && P45975.2 RecName: Full=Histone-lysine N-methyltransferase Su(var)3-9; AltName: Full=Histone H3-K9 methyltransferase; Short=H3-K9-HMTase; AltName: Full=Lysine N-methyltransferase 1; AltName: Full=Protein suppressor of variegation 3-9 && PF00385:Chromo (CHRromatin Organisation MOdifier) domain|PF05033:Pre-SET motif|PF00856:SET domain	SET
FBgn0260874	58.6249	60.9397	21.0591	15.7291	59.7823	18.3941	1.70008	0.00805567	0.144733	Ir76a	3L	19799278	19803427	+	2109	protein_coding	- && - && PF00060:Ligand-gated ion channel	Lig_chan
FBgn0029689	1855.06	1510.85	2730.36	2508.34	1682.95	2619.35	-0.638056	0.00816957	0.146492	CG6428	X	3965435	3968655	-	2699	protein_coding	- && Q9U518.1 RecName: Full=L-asparaginase; AltName: Full=DiAsp; AltName: Full=L-asparagine amidohydrolase && PF12796:Ankyrin repeats (3 copies)|PF00710:Asparaginase|PF13857:Ankyrin repeats (many copies)	-
FBgn0031677	1.04687	0	46.6963	1.85049	0.523437	24.2734	-5.47799	0.00821475	0.147014	CG14036	2L	5054579	5055016	-	438	protein_coding	- && - && -	-
FBgn0035880	700.358	527.761	285.671	396.93	614.06	341.3	0.847749	0.00825513	0.147448	Culd	3L	8352355	8356296	-	3289	protein_coding	- && - && PF00057:Low-density lipoprotein receptor domain class A	Ldl_recept_a
FBgn0261990	534.952	303.549	902.794	696.708	419.251	799.751	-0.930952	0.00833676	0.147871	CG42808	2R	13573618	13574257	-	640	protein_coding	- && - && -	-
FBgn0031373	4739.2	5470.78	2549.98	3672.29	5104.99	3111.14	0.714447	0.00834168	0.147871	CG15358	2L	1882008	1883214	-	1207	protein_coding	- && Q59DY5.1 RecName: Full=C-type lectin 37Db; Flags: Precursor && PF00059:Lectin C-type domain	Lectin_C
FBgn0032022	209.375	213.864	336.03	410.808	211.619	373.419	-0.819361	0.00835887	0.147871	CG14275	2L	8327456	8332911	+	976	protein_coding	- && - && -	-
FBgn0010357	6.28124	18.3969	54.9368	49.0379	12.3391	51.9873	-2.08383	0.00835904	0.147871	betaTry	2R	11346325	11347395	+	1071	protein_coding	- && P35004.2 RecName: Full=Trypsin beta; Flags: Precursor && PF00089:Trypsin	Trypsin
FBgn0023197	17.7968	27.5954	3.66245	0.925244	22.6961	2.29385	3.30343	0.00835966	0.147871	Jon74E	3L	17548077	17549127	-	903	protein_coding	- && P08897.3 RecName: Full=Collagenase; AltName: Full=Hypodermin C; Short=HC; Flags: Precursor && PF00089:Trypsin	Trypsin
FBgn0035933	503.546	132.228	142.836	56.4399	317.887	99.6377	1.67431	0.00841582	0.148577	CG13309	3L	8810395	8811265	+	800	protein_coding	- && - && -	-
FBgn0036454	784.108	854.306	531.055	500.557	819.207	515.806	0.667259	0.00844553	0.148663	CG17839	3L	14805136	14882224	+	6089	protein_coding	- && Q98892.2 RecName: Full=Opioid-binding protein/cell adhesion molecule homolog; AltName: Full=Neurite inhibitor GP55-A; AltName: Full=OBCAM protein gamma isoform; Flags: Precursor && PF00041:Fibronectin type III domain|PF07679:Immunoglobulin I-set domain|PF00047:Immunoglobulin domain|PF01682:DB module	I-set
FBgn0038868	1151.56	969.287	538.38	727.241	1060.42	632.811	0.744994	0.00846006	0.148663	CG5862	3R	21215079	21216226	+	1090	protein_coding	- && Q9VDD1.1 RecName: Full=DDRGK domain-containing protein 1; Flags: Precursor && PF09756:DDRGK domain	-
FBgn0040321	2208.9	3535.66	1616.97	1736.68	2872.28	1676.83	0.776321	0.00846947	0.148663	GNBP3	3L	8955021	8956551	+	1531	protein_coding	- && Q9NHA8.2 RecName: Full=Gram-negative bacteria-binding protein 3; Flags: Precursor && PF15886:Carbohydrate binding domain (family 32)|PF00722:Glycosyl hydrolases family 16	-
FBgn0040964	91.078	94.2841	27.4684	42.5612	92.6811	35.0148	1.4045	0.00855785	0.149924	CG18661	2L	8997605	8998544	+	886	protein_coding	- && Q9VLF6.2 RecName: Full=UPF0585 protein CG18661 && PF06080:Protein of unknown function (DUF938)	-
FBgn0023511	1474	1534.99	698.613	1068.66	1504.49	883.635	0.767772	0.00857409	0.149924	Edem1	X	1903704	1908827	-	4752	protein_coding	- && Q9BV94.2 RecName: Full=ER degradation-enhancing alpha-mannosidase-like protein 2; Flags: Precursor && PF01532:Glycosyl hydrolase family 47	-
FBgn0005660	110.969	82.7861	350.68	138.787	96.8773	244.733	-1.33621	0.00859062	0.149926	Ets21C	2L	544925	552923	-	5407	protein_coding	- && P29776.2 RecName: Full=DNA-binding protein D-ETS-6 && PF02931:Neurotransmitter-gated ion-channel ligand binding domain|PF02198:Sterile alpha motif (SAM)/Pointed domain|PF00178:Ets-domain	Ets
FBgn0265255	6.28124	14.9475	0	0	10.6144	0	5.96838	0.00860708	1	lncRNA:CR44269	2L	21798043	21799112	-	1001	ncRNA	- && - && -	-
FBgn0030789	86.8905	85.0857	156.57	197.077	85.9881	176.823	-1.03992	0.00861222	0.150017	Rrp45	X	16789405	16791266	-	1647	protein_coding	- && Q3SWZ4.1 RecName: Full=Exosome complex component RRP45; AltName: Full=Exosome component 9 && PF01138:3' exoribonuclease family, domain 1	RNase_PH
FBgn0051279	0	0	6.40929	16.6544	0	11.5318	-5.83628	0.00865013	1	CG31279	3R	16430681	16432897	+	1582	protein_coding	- && - && -	-
FBgn0002887	80.6092	90.8347	129.101	286.826	85.722	207.963	-1.27892	0.0086535	0.150449	mus201	2L	8438169	8442342	+	3950	protein_coding	- && P28715.3 RecName: Full=DNA repair protein complementing XP-G cells; AltName: Full=DNA excision repair protein ERCC-5; AltName: Full=Xeroderma pigmentosum group G-complementing protein && PF00867:XPG I-region|PF00752:XPG N-terminal domain	XPG_I
FBgn0036035	117.25	147.175	211.507	323.835	132.213	267.671	-1.01837	0.00869876	0.150734	CG18178	3L	9717786	9719144	-	1310	protein_coding	- && - && -	-
FBgn0263083	360.124	395.533	236.228	193.376	377.829	214.802	0.814455	0.00870285	0.150734	CG43351	2R	19030009	19030250	+	242	protein_coding	- && - && -	-
FBgn0023395	8.37499	3.44942	94.3081	7.40195	5.9122	50.855	-3.09793	0.00875436	0.15106	Chd3	3L	19447173	19450238	+	3066	protein_coding	- && O16102.3 RecName: Full=Chromodomain-helicase-DNA-binding protein 3; AltName: Full=ATP-dependent helicase Chd3 && PF00385:Chromo (CHRromatin Organisation MOdifier) domain|PF00271:Helicase conserved C-terminal domain|PF00628:PHD-finger|PF00176:SNF2 family N-terminal domain	SNF2_N
FBgn0035909	3074.67	3049.29	1757.06	2202.08	3061.98	1979.57	0.629293	0.0087547	0.15106	ergic53	3L	8534977	8538013	+	2463	protein_coding	- && Q9TU32.1 RecName: Full=Protein ERGIC-53; AltName: Full=ER-Golgi intermediate compartment 53 kDa protein; AltName: Full=Lectin mannose-binding 1; Flags: Precursor && PF03388:Legume-like lectin family	-
FBgn0036273	97.3592	93.1343	183.123	192.451	95.2468	187.787	-0.979093	0.0087829	0.151127	INPP5E	3L	12277655	12281476	+	3133	protein_coding	- && Q9WVR1.2 RecName: Full=72 kDa inositol polyphosphate 5-phosphatase; AltName: Full=5-phosphatase that induces arborization; Short=Pharbin; AltName: Full=Phosphatidylinositol 4,5-bisphosphate 5-phosphatase; AltName: Full=Phosphatidylinositol polyphosphate 5-phosphatase type IV; Flags: Precursor && PF03372:Endonuclease/Exonuclease/phosphatase family	Exo_endo_phos
FBgn0034229	3069.43	5294.86	2312.84	2460.22	4182.15	2386.53	0.809227	0.00880715	0.151127	CG4847	2R	17511513	17513855	+	1533	protein_coding	- && Q95029.2 RecName: Full=Cathepsin L; AltName: Full=Cysteine proteinase 1; Contains: RecName: Full=Cathepsin L heavy chain; Contains: RecName: Full=Cathepsin L light chain; Flags: Precursor && PF08246:Cathepsin propeptide inhibitor domain (I29)|PF00112:Papain family cysteine protease	Peptidase_C1
FBgn0086365	507.734	432.327	300.321	242.414	470.03	271.367	0.792736	0.00880817	0.151127	Orct2	3R	24273029	24275728	+	2700	protein_coding	- && Q95R48.2 RecName: Full=Organic cation transporter-like protein && PF00083:Sugar (and other) transporter	Sugar_tr
FBgn0031523	140.281	51.7413	33.8777	24.9816	96.0112	29.4296	1.70759	0.00885335	0.151247	CG15408	2L	3332814	3334790	+	1565	protein_coding	- && A9ZSY3.1 RecName: Full=Facilitated trehalose transporter Tret1; Short=BmTRET1 && PF00083:Sugar (and other) transporter	Sugar_tr
FBgn0050090	25.125	20.6965	1.83123	3.70097	22.9107	2.7661	3.05177	0.00885884	0.151247	CG30090	2R	15689826	15691014	+	999	protein_coding	- && P40313.1 RecName: Full=Chymotrypsin-like protease CTRL-1; Flags: Precursor && PF00089:Trypsin	Trypsin
FBgn0001330	216.703	180.52	265.528	613.437	198.611	439.482	-1.14543	0.00886479	0.151247	kz	X	2237858	2242035	-	3927	protein_coding	- && O46072.1 RecName: Full=Probable ATP-dependent RNA helicase kurz && PF00270:DEAD/DEAH box helicase|PF04408:Helicase associated domain (HA2)|PF00271:Helicase conserved C-terminal domain|PF07717:Oligonucleotide/oligosaccharide-binding (OB)-fold	DUF1605
FBgn0036837	37648.7	34214.8	21604.8	26016.9	35931.7	23810.9	0.593644	0.00892157	0.151932	CG18135	3L	18990026	18998283	-	4072	protein_coding	- && Q9NPB8.2 RecName: Full=Glycerophosphocholine phosphodiesterase GPCPD1; AltName: Full=Glycerophosphodiester phosphodiesterase 5 && PF03009:Glycerophosphoryl diester phosphodiesterase family|PF00686:Starch binding domain	-
FBgn0038214	6.28124	12.6479	44.865	38.8602	9.46456	41.8626	-2.15221	0.00902068	0.153335	CG9616	3R	14244804	14245471	-	550	protein_coding	- && - && PF16030:Serine protease gd N-terminus	-
FBgn0035627	1.04687	6.89884	42.1182	20.3554	3.97286	31.2368	-2.99367	0.00904761	0.153507	Sse	3L	5659700	5662247	-	2177	protein_coding	- && - && PF03568:Peptidase family C50	-
FBgn0037707	194.718	200.066	319.549	373.798	197.392	346.674	-0.812583	0.00907874	0.15375	RnpS1	3R	9552034	9553747	+	1370	protein_coding	- && A6QR16.1 RecName: Full=RNA-binding protein with serine-rich domain 1 && PF00076:RNA recognition motif. (a.k.a. RRM, RBD, or RNP domain)	RRM_1
FBgn0032374	2.09375	0	61.3461	0.925244	1.04687	31.1357	-4.86294	0.00909914	0.153811	CG14931	2L	11788334	11789475	+	1024	protein_coding	- && - && -	-
FBgn0051205	93.1717	236.86	62.2617	61.9913	165.016	62.1265	1.40788	0.00915958	0.154547	CG31205	3R	20731631	20732707	+	1020	protein_coding	- && Q8K3U6.1 RecName: Full=Coagulation factor VII; AltName: Full=Serum prothrombin conversion accelerator; Contains: RecName: Full=Factor VII light chain; Contains: RecName: Full=Factor VII heavy chain; Flags: Precursor && PF00089:Trypsin	Trypsin
FBgn0031483	36.6406	48.2919	187.701	67.5428	42.4662	127.622	-1.58891	0.00918861	0.154751	CG9641	2L	2974859	2976862	-	1933	protein_coding	- && - && PF16012:Domain of unknown function (DUF4780)	-
FBgn0036576	65.953	71.288	168.473	128.609	68.6205	148.541	-1.11468	0.00927115	0.155854	CG5151	3L	16137802	16164701	-	7580	protein_coding	- && - && -	-
FBgn0027793	3.14062	11.4981	38.4557	38.8602	7.31934	38.658	-2.41325	0.00932818	0.156525	CG14787	X	1460807	1461676	-	870	protein_coding	- && - && -	-
FBgn0260817	61.7655	83.9359	119.03	232.236	72.8507	175.633	-1.27073	0.0093725	0.156981	gkt	2L	3159950	3162399	+	2221	protein_coding	- && Q9VQM4.1 RecName: Full=Probable tyrosyl-DNA phosphodiesterase; Short=Tyr-DNA phosphodiesterase; AltName: Full=Protein glaikit && PF10283:Zinc-finger (CX5CX6HX5H) motif|PF06087:Tyrosyl-DNA phosphodiesterase	Tyr-DNA_phospho
FBgn0038830	294.171	289.751	166.642	162.843	291.961	164.742	0.825597	0.00940984	0.157318	CG17272	3R	20823313	20824239	-	670	protein_coding	- && Q96GE6.3 RecName: Full=Calmodulin-like protein 4; AltName: Full=Serologically defined breast cancer antigen NY-BR-20 && PF13499:EF-hand domain pair	-
FBgn0034454	77.4686	124.179	46.6963	22.2058	100.824	34.4511	1.54777	0.00948975	0.158235	CG15120	2R	19497752	19500372	+	1070	protein_coding	- && Q9DAK2.1 RecName: Full=Parkin coregulated gene protein homolog; AltName: Full=Hypertension-related protein 1-like protein; AltName: Full=PARK2 coregulated gene protein && PF10274:Parkin co-regulated protein	-
FBgn0036862	1834.12	1652.27	1055.7	1211.14	1743.2	1133.42	0.621145	0.00949928	0.158235	Gbs-76A	3L	19281364	19292766	-	5392	protein_coding	- && Q9VVY3.1 RecName: Full=Glycogen-binding subunit 76A; AltName: Full=CBM21 domain-containing protein CG9619 && PF03370:Carbohydrate/starch-binding module (family 21)	-
FBgn0030048	49.203	22.9961	100.717	99.9263	36.0996	100.322	-1.47009	0.00958803	0.159412	CG12112	X	8558879	8560192	-	1117	protein_coding	- && - && PF16064:Domain of unknown function (DUF4806)	-
FBgn0036838	124.578	96.5838	167.557	325.686	110.581	246.621	-1.15624	0.0096048	0.159412	CG3808	3L	18997875	19000608	-	2522	protein_coding	- && Q8IZ69.2 RecName: Full=tRNA (uracil-5-)-methyltransferase homolog A; AltName: Full=HpaII tiny fragments locus 9c protein && PF05958:tRNA (Uracil-5-)-methyltransferase	-
FBgn0032135	268	236.86	148.329	122.132	252.43	135.231	0.900694	0.00963203	0.159574	GlcAT-S	2L	9616469	9623109	+	2682	protein_coding	- && Q9VLA1.2 RecName: Full=Galactosylgalactosylxylosylprotein 3-beta-glucuronosyltransferase S; AltName: Full=Beta-1,3-glucuronyltransferase S; AltName: Full=Glucuronosyltransferase S; Short=GlcAT-S; AltName: Full=UDP-glucuronosyltransferase S; Short=DmGlcAT-BSI && PF03360:Glycosyltransferase family 43	-
FBgn0016685	884.608	1054.37	1379.83	1714.48	969.49	1547.15	-0.674506	0.00967975	0.160075	Nlp	3R	30004785	30010352	+	1080	protein_coding	- && Q27415.1 RecName: Full=Nucleoplasmin-like protein; AltName: Full=Chromatin decondensation protein 1; AltName: Full=dNLP && PF03066:Nucleoplasmin	-
FBgn0039004	106.781	103.483	217	188.75	105.132	202.875	-0.948267	0.00979239	0.161645	Nup133	3R	22690607	22694772	+	3742	protein_coding	- && Q8WUM0.2 RecName: Full=Nuclear pore complex protein Nup133; AltName: Full=133 kDa nucleoporin; AltName: Full=Nucleoporin Nup133 && PF08801:Nup133 N terminal like|PF03177:Non-repetitive/WGA-negative nucleoporin C-terminal	-
FBgn0034576	2197.39	2691.7	1639.86	1539.61	2444.54	1589.73	0.620663	0.00986346	0.162015	ND-B14.7	2R	21025078	21026086	+	712	protein_coding	- && - && -	-
FBgn0050359	3075.71	3842.65	1931.94	2430.62	3459.18	2181.28	0.665194	0.00986625	0.162015	Mal-A5	2R	8462753	8465092	+	2102	protein_coding	- && P07192.2 RecName: Full=Maltase A3; AltName: Full=Larval visceral protein L; Flags: Precursor && PF00128:Alpha amylase, catalytic domain	-
FBgn0036262	180992	158064	122730	101851	169528	112290	0.59429	0.00986792	0.162015	CG6910	3L	12184984	12187860	+	1609	protein_coding	- && Q9QXN5.2 RecName: Full=Inositol oxygenase; AltName: Full=Aldehyde reductase-like 6; AltName: Full=Myo-inositol oxygenase; Short=MI oxygenase; AltName: Full=Renal-specific oxidoreductase && PF05153:Myo-inositol oxygenase	-
FBgn0034940	77.4686	70.1382	123.608	209.105	73.8034	166.356	-1.17192	0.00991969	0.162573	CG16787	2R	23956335	23957405	-	1071	protein_coding	- && - && PF10184:Uncharacterized conserved protein (DUF2358)	-
FBgn0034063	404.093	473.72	242.637	273.872	438.907	258.255	0.764836	0.0100056	0.163688	CG8389	2R	16008339	16013815	+	2041	protein_coding	- && - && PF07690:Major Facilitator Superfamily	MFS_1
FBgn0037151	92.1249	152.924	171.22	437.64	122.525	304.43	-1.31413	0.0100783	0.164563	CG7130	3L	22075056	22075756	-	701	protein_coding	- && Q2KIT4.1 RecName: Full=DnaJ homolog subfamily B member 4 && PF00226:DnaJ domain	DnaJ
FBgn0032859	323.484	390.934	831.377	493.155	357.209	662.266	-0.891025	0.0100951	0.164563	Arpc2	2L	20417057	20423027	+	1974	protein_coding	- && Q9VIM5.2 RecName: Full=Actin-related protein 2/3 complex subunit 2; AltName: Full=Arp2/3 complex 34 kDa subunit; Short=p34-ARC && PF04045:Arp2/3 complex, 34 kD subunit p34-Arc	-
FBgn0033357	618.702	643.892	432.169	307.181	631.297	369.675	0.771933	0.0101291	0.164822	Tom7	2R	8951595	8952242	+	539	protein_coding	- && Q9D173.1 RecName: Full=Mitochondrial import receptor subunit TOM7 homolog; AltName: Full=Translocase of outer membrane 7 kDa subunit homolog && -	-
FBgn0261274	1375.59	896.849	679.385	654.147	1136.22	666.766	0.769306	0.0101941	0.165586	Ero1L	3L	4170404	4173789	+	2100	protein_coding	- && Q9V3A6.2 RecName: Full=Ero1-like protein; AltName: Full=Endoplasmic reticulum oxidoreductin-1-like protein; Flags: Precursor && PF04137:Endoplasmic Reticulum Oxidoreductin 1 (ERO1)	-
FBgn0262352	41.8749	77.037	119.945	168.394	59.456	144.17	-1.28075	0.0103137	0.166295	CG43050	2L	13119294	13120767	+	1119	protein_coding	- && - && -	-
FBgn0037765	4208.43	5747.88	2871.36	3377.14	4978.16	3124.25	0.672036	0.0103164	0.166295	CG9458	3R	9818914	9819877	-	900	protein_coding	- && A1L3X0.1 RecName: Full=Elongation of very long chain fatty acids protein 7; AltName: Full=3-keto acyl-CoA synthase ELOVL7; AltName: Full=ELOVL fatty acid elongase 7; Short=ELOVL FA elongase 7; AltName: Full=Very long chain 3-ketoacyl-CoA synthase 7; AltName: Full=Very long chain 3-oxoacyl-CoA synthase 7 && PF01151:GNS1/SUR4 family	ELO
FBgn0029990	78989.7	95561.6	51641.5	62578.9	87275.7	57110.2	0.611829	0.0103349	0.166295	CG2233	X	8035741	8037517	-	1480	protein_coding	- && - && -	-
novel.3	13.6094	20.6965	0	1.85049	17.1529	0.925244	4.21566	0.0103473	0.166295	-	211000022279511	34	1155	+	1122	-	- && - && -	-
FBgn0038719	169.593	50.5915	41.2026	6.47671	110.092	23.8396	2.20777	0.0103818	0.166295	CG16727	3R	19613381	19615784	+	2014	protein_coding	- && Q9Y226.2 RecName: Full=Solute carrier family 22 member 13; AltName: Full=Organic cation transporter-like 3; Short=ORCTL-3 && PF00083:Sugar (and other) transporter	Sugar_tr
FBgn0000119	907.639	674.936	423.013	515.361	791.288	469.187	0.754408	0.0103877	0.166295	arr	2R	13453640	13483229	-	6024	protein_coding	- && O88572.1 RecName: Full=Low-density lipoprotein receptor-related protein 6; Short=LRP-6; Flags: Precursor && PF00058:Low-density lipoprotein receptor repeat class B|PF14670:Coagulation Factor Xa inhibitory site|PF00057:Low-density lipoprotein receptor domain class A	Ldl_recept_a
FBgn0036319	213.562	146.025	93.3925	77.7205	179.794	85.5565	1.07225	0.0103936	0.166295	Ent3	3L	12853646	12857428	+	3363	protein_coding	- && Q7RTT9.1 RecName: Full=Equilibrative nucleoside transporter 4; Short=hENT4; AltName: Full=Plasma membrane monoamine transporter; AltName: Full=Solute carrier family 29 member 4 && PF01733:Nucleoside transporter	-
FBgn0038869	205.187	202.366	288.418	503.333	203.777	395.875	-0.957949	0.0103952	0.166295	Smyd5	3R	21217268	21218791	-	1356	protein_coding	- && Q5ZIZ2.1 RecName: Full=SET and MYND domain-containing protein 5 && PF00856:SET domain	SET
FBgn0032402	1675	2103	1064.86	1306.44	1889	1185.65	0.671823	0.0104076	0.166295	CG14945	2L	12049418	12052049	+	2486	protein_coding	- && Q8CHS4.1 RecName: Full=PI-PLC X domain-containing protein 1 && -	-
FBgn0030660	58.6249	50.5915	142.836	106.403	54.6082	124.619	-1.18951	0.0104196	0.166295	CG8097	X	15583159	15585249	+	1903	protein_coding	- && Q5D0E6.2 RecName: Full=DALR anticodon-binding domain-containing protein 3 && PF05746:DALR anticodon binding domain	-
FBgn0264253	0	0	332.367	7.40195	0	169.885	-9.71722	0.0104425	0.166371	Send2	2L	14345915	14346688	-	774	protein_coding	- && P54624.1 RecName: Full=Trypsin alpha; Flags: Precursor && PF00089:Trypsin	Trypsin
FBgn0286898	2867.39	2518.08	1390.82	1949.49	2692.73	1670.15	0.689162	0.0104712	0.166537	Tango1	2L	6649388	6654574	+	4679	protein_coding	- && Q9VMA7.2 RecName: Full=Transport and Golgi organization protein 1; Flags: Precursor && -	-
FBgn0013307	5710.69	7210.44	4023.2	4425.44	6460.57	4224.32	0.612895	0.0104924	0.166585	Odc1	2R	8004824	8006672	+	1253	protein_coding	- && P40807.3 RecName: Full=Ornithine decarboxylase 1; Short=ODC && PF02784:Pyridoxal-dependent decarboxylase, pyridoxal binding domain|PF00278:Pyridoxal-dependent decarboxylase, C-terminal sheet domain	-
FBgn0034734	303.593	271.354	377.233	779.98	287.474	578.606	-1.0089	0.0105269	0.166843	CG4554	2R	22483303	22492033	+	8425	protein_coding	- && Q5XG71.2 RecName: Full=Small subunit processome component 20 homolog; AltName: Full=Down-regulated in metastasis protein && PF07539:Down-regulated in metastasis	-
FBgn0036772	220.89	227.662	315.886	537.567	224.276	426.726	-0.928046	0.0106716	0.168658	CG5290	3L	17909483	17912565	-	2917	protein_coding	- && Q5F3K0.1 RecName: Full=Tetratricopeptide repeat protein 27; Short=TPR repeat protein 27 && -	-
FBgn0086676	3353.14	2304.21	1445.75	1918.96	2828.67	1682.35	0.749776	0.0106783	0.168658	spin	2R	16124981	16138238	+	3656	protein_coding	- && Q9GQQ0.1 RecName: Full=Protein spinster; AltName: Full=Protein benchwarmer; AltName: Full=Protein diphthong && PF07690:Major Facilitator Superfamily	MFS_1
FBgn0036514	161.218	127.629	214.253	380.275	144.424	297.264	-1.04063	0.0108129	0.17049	CG12301	3L	15580800	15583373	+	2515	protein_coding	- && Q9BVJ6.1 RecName: Full=U3 small nucleolar RNA-associated protein 14 homolog A; AltName: Full=Antigen NY-CO-16; AltName: Full=Serologically defined colon cancer antigen 16 && PF04615:Utp14 protein	Utp14
FBgn0031170	1640.45	1755.75	1204.03	1014.07	1698.1	1109.05	0.614528	0.0110125	0.173068	ABCA	X	21292308	21306665	-	7210	protein_coding	- && Q99758.2 RecName: Full=ATP-binding cassette sub-family A member 3; AltName: Full=ABC-C transporter; AltName: Full=ATP-binding cassette transporter 3; Short=ATP-binding cassette 3 && PF00005:ABC transporter|PF12698:ABC-2 family transporter protein	ABC_tran
FBgn0036881	194.718	172.471	65.9241	107.328	183.595	86.6262	1.08415	0.0110375	0.173068	Cpr76Bd	3L	19532743	19538289	+	4525	protein_coding	- && P45583.1 RecName: Full=Cuticle protein 19; AltName: Full=LM-ACP 19; Short=LM-19 && PF00379:Insect cuticle protein	Chitin_bind_4
FBgn0010388	614.515	292.051	722.419	1137.12	453.283	929.771	-1.03572	0.0110447	0.173068	Dro	2R	14745961	14746714	+	754	protein_coding	- && P36193.2 RecName: Full=Drosocin; Flags: Precursor && -	-
FBgn0035955	1.04687	1.14981	65.0085	0	1.09834	32.5043	-4.88878	0.0110521	0.173068	CG5194	3L	9008624	9009838	-	1113	protein_coding	- && - && -	-
FBgn0038968	325.578	338.043	434.001	851.224	331.81	642.612	-0.953599	0.0111086	0.173654	CG12499	3R	22440152	22446587	-	6384	protein_coding	- && Q571H0.2 RecName: Full=Nucleolar pre-ribosomal-associated protein 1; AltName: Full=URB1 ribosome biogenesis 1 homolog && PF16201:Nucleolar pre-ribosomal-associated protein 1|PF11707:Ribosome 60S biogenesis N-terminal	-
FBgn0053177	6.28124	2.29961	17.3966	42.5612	4.29043	29.9789	-2.79311	0.0111486	0.173983	CG33177	X	15081367	15082369	+	862	protein_coding	- && Q91VS7.3 RecName: Full=Microsomal glutathione S-transferase 1; Short=Microsomal GST-1; AltName: Full=Microsomal GST-I && PF01124:MAPEG family	-
FBgn0031734	1139	1295.83	804.824	784.607	1217.42	794.715	0.615167	0.0111763	0.174118	CG11147	2L	5733675	5741244	-	3030	protein_coding	- && Q55EH8.2 RecName: Full=ABC transporter G family member 23; AltName: Full=ABC transporter ABCG.23 && PF12698:ABC-2 family transporter protein|PF00005:ABC transporter	ABC_tran
FBgn0005278	12452.6	9577.89	7048.39	7389.92	11015.2	7219.15	0.609629	0.0111987	0.17417	Sam-S	2L	106903	114432	+	3559	protein_coding	- && P40320.2 RecName: Full=S-adenosylmethionine synthase; Short=AdoMet synthase; AltName: Full=Methionine adenosyltransferase; Short=MAT && PF02773:S-adenosylmethionine synthetase, C-terminal domain|PF02772:S-adenosylmethionine synthetase, central domain|PF00438:S-adenosylmethionine synthetase, N-terminal domain	-
FBgn0250757	651.155	296.65	125.439	274.797	473.903	200.118	1.24436	0.0112698	0.174214	CG42235	3R	25907022	25921046	+	8363	protein_coding	- && Q5BL81.1 RecName: Full=Sodium-coupled monocarboxylate transporter 1; AltName: Full=Electrogenic sodium monocarboxylate cotransporter; AltName: Full=Solute carrier family 5 member 8 && PF00474:Sodium:solute symporter family	-
FBgn0004419	642.78	786.468	2111.4	844.747	714.624	1478.08	-1.04862	0.0112707	0.174214	me31B	2L	10239341	10242172	+	1845	protein_coding	- && P23128.3 RecName: Full=Putative ATP-dependent RNA helicase me31b; AltName: Full=Maternal expression at 31B && PF00270:DEAD/DEAH box helicase|PF00271:Helicase conserved C-terminal domain	DEAD
FBgn0026427	210.422	185.119	334.199	346.966	197.77	340.583	-0.783664	0.0112729	0.174214	Su(var)2-HP2	2R	14607154	14618118	-	10289	protein_coding	- && - && -	-
FBgn0035696	284.75	328.845	184.038	163.768	306.797	173.903	0.818602	0.0112998	0.174214	Best2	3L	6245933	6256665	-	3547	protein_coding	- && Q6H1V1.1 RecName: Full=Bestrophin-3; AltName: Full=Vitelliform macular dystrophy 2-like protein 3 && PF01062:Bestrophin, RFP-TM, chloride channel	-
FBgn0036857	3043.26	2730.79	1985.96	1910.63	2887.03	1948.3	0.567426	0.0113153	0.174214	Aldh7A1	3L	19266473	19268913	-	2053	protein_coding	- && P46562.2 RecName: Full=Putative aldehyde dehydrogenase family 7 member A1 homolog; AltName: Full=ALH-9 && PF00171:Aldehyde dehydrogenase family	Aldedh
FBgn0038681	5213.43	4671.66	3411.57	3323.48	4942.55	3367.52	0.553601	0.0113159	0.174214	Cyp12a4	3R	19135158	19137136	+	1697	protein_coding	- && Q9VE00.2 RecName: Full=Probable cytochrome P450 12a4, mitochondrial; AltName: Full=CYPXIIA4; Flags: Precursor && PF00067:Cytochrome P450	p450
FBgn0024991	132.953	137.977	285.671	219.283	135.465	252.477	-0.898458	0.0113348	0.174214	CG2694	X	2714079	2717654	+	3152	protein_coding	- && - && PF10263:SprT-like family	-
FBgn0034476	160.172	171.321	74.1646	90.6739	165.746	82.4193	1.00783	0.0113829	0.174659	Toll-7	2R	19826578	19832973	+	6396	protein_coding	- && Q7KIN0.1 RecName: Full=Toll-like receptor 7; Flags: Precursor && PF13855:Leucine rich repeat|PF01582:TIR domain	TIR
FBgn0032727	374.781	371.388	188.616	241.489	373.084	215.052	0.794914	0.0114219	0.174964	CG10623	2L	18955481	18957311	-	1725	protein_coding	- && Q9M1W4.1 RecName: Full=Homocysteine S-methyltransferase 2; AltName: Full=S-methylmethionine:homocysteine methyltransferase 2; Short=AtHMT-2; Short=SMM:Hcy S-methyltransferase 2 && PF02574:Homocysteine S-methyltransferase	-
FBgn0026314	239.734	205.815	130.933	102.702	222.775	116.817	0.93162	0.0114727	0.175448	Ugt35B1	3R	11168503	11170246	-	1672	protein_coding	- && P36513.1 RecName: Full=UDP-glucuronosyltransferase 2B14; Short=UDPGT 2B14; AltName: Full=EGT12; Flags: Precursor && PF00201:UDP-glucoronosyl and UDP-glucosyl transferase	UDPGT
FBgn0000406	41823.6	57445.5	27837.4	34654.1	49634.6	31245.7	0.667679	0.011508	0.175694	Cyt-b5-r	2L	16788774	16790721	-	1557	protein_coding	- && P19967.2 RecName: Full=Cytochrome b5-related protein; AltName: Full=Protein TU-36B && PF00173:Cytochrome b5-like Heme/Steroid binding domain|PF00487:Fatty acid desaturase	-
FBgn0036145	84.7967	106.932	34.7933	43.4865	95.8644	39.1399	1.29176	0.0115692	0.176064	CG7607	3L	11199620	11200587	+	668	protein_coding	- && Q5WRU0.1 RecName: Full=Immunoglobulin domain-containing protein oig-4; Flags: Precursor && PF07679:Immunoglobulin I-set domain	I-set
FBgn0034756	307.781	477.17	547.537	982.609	392.475	765.073	-0.963535	0.0115862	0.176064	Cyp6d2	2R	22652573	22654530	-	1759	protein_coding	- && Q9W223.1 RecName: Full=Probable cytochrome P450 6d2; AltName: Full=CYPVID2 && PF00067:Cytochrome P450	p450
FBgn0032793	249.156	224.212	234.397	1027.02	236.684	630.709	-1.41386	0.01159	0.176064	CG10189	2L	19491647	19493253	-	1404	protein_coding	- && Q9VIV3.1 RecName: Full=Cytoplasmic tRNA 2-thiolation protein 2 && PF10288:Cytoplasmic tRNA 2-thiolation protein 2	-
FBgn0032873	127.719	118.43	196.857	277.573	123.074	237.215	-0.946264	0.0116198	0.176223	CG2614	2L	20656426	20659218	+	2246	protein_coding	- && Q9VIK9.1 RecName: Full=Methyltransferase-like protein 13 && PF08241:Methyltransferase domain|PF01564:Spermine/spermidine synthase	Methyltransf_11
FBgn0033437	29.3125	26.4456	65.0085	86.9729	27.879	75.9907	-1.44576	0.0117669	0.17816	CG12926	2R	9608128	9610290	-	1347	protein_coding	- && - && PF00650:CRAL/TRIO domain	-
FBgn0043792	275.328	341.493	189.532	150.815	308.41	170.173	0.857291	0.0118131	0.178564	CG30427	2R	24928747	24937477	-	3771	protein_coding	- && A1ZAI5.1 RecName: Full=Putative fatty acyl-CoA reductase CG5065 && PF03015:Male sterility protein|PF07993:Male sterility protein	NAD_binding_4
FBgn0025832	31.4062	35.644	79.6583	89.7486	33.5251	84.7035	-1.3381	0.0118527	0.178867	Fen1	2R	16854025	16855464	-	1378	protein_coding	- && Q7K7A9.1 RecName: Full=Flap endonuclease 1; Short=FEN-1; AltName: Full=Flap structure-specific endonuclease 1 && PF00752:XPG N-terminal domain|PF00867:XPG I-region	XPG_I
FBgn0036660	31.4062	35.644	128.186	61.0661	33.5251	94.6259	-1.49793	0.0119233	0.179636	CG13025	3L	16776531	16779736	-	3145	protein_coding	- && - && PF13639:Ring finger domain	-
FBgn0023535	3047.45	3839.2	2305.51	2225.21	3443.33	2265.36	0.603969	0.0119769	0.180146	arg	X	509435	528028	+	1243	protein_coding	- && P78540.1 RecName: Full=Arginase-2, mitochondrial; AltName: Full=Kidney-type arginase; AltName: Full=Non-hepatic arginase; AltName: Full=Type II arginase; Flags: Precursor && PF00491:Arginase family	-
FBgn0262057	2401.53	2657.2	1700.29	1722.8	2529.37	1711.55	0.563413	0.0120379	0.180767	Spn77Ba	3L	20317190	20320116	+	2161	protein_coding	- && Q0E8C8.1 RecName: Full=Serine protease inhibitor 77Ba; Short=Serpin 77Ba; Flags: Precursor && PF00079:Serpin (serine protease inhibitor)	Serpin
FBgn0035519	2155.51	2520.38	1234.25	1694.12	2337.94	1464.18	0.675093	0.0120812	0.18101	CG1309	3L	4259430	4261643	+	1859	protein_coding	- && Q5R6S0.1 RecName: Full=Protein ABHD16A; AltName: Full=Alpha/beta hydrolase domain-containing protein 16A; Short=Abhydrolase domain-containing protein 16A; AltName: Full=HLA-B-associated transcript 5 && PF12695:Alpha/beta hydrolase family	-
FBgn0038772	48.1562	57.4903	131.848	105.478	52.8233	118.663	-1.16881	0.0121062	0.18101	mdlc	3R	20057748	20059291	+	1419	protein_coding	- && O15541.1 RecName: Full=RING finger protein 113A; AltName: Full=Zinc finger protein 183 && PF00642:Zinc finger C-x8-C-x5-C-x3-H type (and similar)|PF13920:Zinc finger, C3HC4 type (RING finger)	zf-CCCH
FBgn0053303	1705.36	1831.64	832.292	1291.64	1768.5	1061.97	0.735785	0.0121294	0.18101	CG33303	2L	10373369	10375757	-	2333	protein_coding	- && Q91YQ5.1 RecName: Full=Dolichyl-diphosphooligosaccharide--protein glycosyltransferase subunit 1; AltName: Full=Dolichyl-diphosphooligosaccharide--protein glycosyltransferase 67 kDa subunit; AltName: Full=Ribophorin I; Short=RPN-I; AltName: Full=Ribophorin-1; Flags: Precursor && PF04597:Ribophorin I	-
FBgn0037534	259.625	510.514	978.79	585.679	385.069	782.235	-1.02329	0.0121333	0.18101	ELOVL	3R	7981817	7995852	-	1974	protein_coding	- && Q1HRV8.2 RecName: Full=Elongation of very long chain fatty acids protein AAEL008004; AltName: Full=3-keto acyl-CoA synthase AAEL008004; AltName: Full=Very-long-chain 3-oxoacyl-CoA synthase AAEL008004 && PF01151:GNS1/SUR4 family	ELO
FBgn0040477	6.28124	2.29961	70.5022	6.47671	4.29043	38.4894	-3.15643	0.0121806	0.181419	cid	2R	13485617	13486631	+	1015	protein_coding	- && Q9V6Q2.2 RecName: Full=Histone H3-like centromeric protein cid; AltName: Full=CENP-A homolog; AltName: Full=Centromere identifier protein && PF00125:Core histone H2A/H2B/H3/H4	Histone
FBgn0013694	444.921	620.896	193.194	353.443	532.908	273.319	0.963079	0.0122191	0.181419	mt:tRNA:Gly-TCC	mitochondrion_genome	5543	5607	+	65	tRNA	- && - && -	-
FBgn0031649	50.2499	45.9923	16.481	11.1029	48.1211	13.792	1.80278	0.0122202	0.181419	hoe2	2L	4933047	4936450	-	2888	protein_coding	- && Q8MIQ9.3 RecName: Full=P protein; AltName: Full=Melanocyte-specific transporter protein; AltName: Full=Pink-eyed dilution protein homolog && PF03600:Citrate transporter	-
FBgn0031417	4559.13	7463.39	3947.21	3112.52	6011.26	3529.86	0.767984	0.0122457	0.181502	CG3597	2L	2370152	2371524	-	1229	protein_coding	- && Q642M9.2 RecName: Full=Trans-1,2-dihydrobenzene-1,2-diol dehydrogenase; AltName: Full=D-xylose 1-dehydrogenase; AltName: Full=D-xylose-NADP dehydrogenase; AltName: Full=Dimeric dihydrodiol dehydrogenase && PF01408:Oxidoreductase family, NAD-binding Rossmann fold	GFO_IDH_MocA
FBgn0033234	11.5156	11.4981	67.7554	27.7573	11.5068	47.7563	-2.0534	0.0122967	0.181963	MFS12	2R	7926653	7929922	+	2420	protein_coding	- && O61369.1 RecName: Full=Putative inorganic phosphate cotransporter && PF07690:Major Facilitator Superfamily	MFS_1
FBgn0003087	6.28124	5.74903	119.03	1.85049	6.01514	60.4401	-3.32839	0.0123307	0.182172	pim	2L	10362989	10364092	+	978	protein_coding	- && - && PF04856:Securin sister-chromatid separation inhibitor	-
FBgn0051704	157.031	58.6401	21.0591	46.2622	107.836	33.6606	1.68154	0.0124546	0.183706	CG31704	2L	11840691	11841204	+	514	protein_coding	- && - && -	-
FBgn0022029	671.046	622.045	878.988	1236.13	646.546	1057.56	-0.709772	0.0125383	0.184643	l(2)k01209	2R	17420407	17425679	+	3254	protein_coding	- && Q91YL3.1 RecName: Full=Uridine-cytidine kinase-like 1 && PF14681:Uracil phosphoribosyltransferase|PF00485:Phosphoribulokinase / Uridine kinase family	-
FBgn0000427	1.04687	2.29961	5.49368	39.7855	1.67324	22.6396	-3.76977	0.0125916	0.184755	2023-12-01	X	7867161	7873222	-	5748	protein_coding	- && P18171.2 RecName: Full=Defective chorion-1 protein, FC177 isoform; Flags: Precursor && PF04625:DEC-1 protein, N-terminal region|PF04626:Dec-1 protein, C terminal region|PF04624:Dec-1 repeat	-
FBgn0038105	1588.11	2564.07	996.187	1378.61	2076.09	1187.4	0.805911	0.0126016	0.184755	yellow-f2	3R	12993395	12995147	-	1462	protein_coding	- && Q9VG08.2 RecName: Full=L-dopachrome tautomerase yellow-f2; Flags: Precursor && PF03022:Major royal jelly protein	-
FBgn0032252	365.359	409.331	251.794	198.002	387.345	224.898	0.784039	0.0126066	0.184755	loh	2L	10442534	10450080	+	3374	protein_coding	- && Q6ZMP0.2 RecName: Full=Thrombospondin type-1 domain-containing protein 4; AltName: Full=A disintegrin and metalloproteinase with thrombospondin motifs-like protein 6; Short=ADAMTS-like protein 6; Short=ADAMTSL-6; Flags: Precursor && PF05986:ADAM-TS Spacer 1|PF00090:Thrombospondin type 1 domain|PF08686:PLAC (protease and lacunin) domain	TSP_1
FBgn0038473	653.249	638.143	832.292	1443.38	645.696	1137.84	-0.817309	0.0126818	0.185458	Ns1	3R	17070523	17072675	-	1895	protein_coding	- && Q8MT06.2 RecName: Full=Guanine nucleotide-binding protein-like 3 homolog; AltName: Full=Nucleostemin 1; AltName: Full=Nucleostemin homolog && PF01926:50S ribosome-binding GTPase|PF08701:GNL3L/Grn1 putative GTPase	-
FBgn0030189	118.297	200.066	340.608	2004.08	159.182	1172.34	-2.88083	0.0126985	0.185458	CG2909	X	10326464	10328946	+	2018	protein_coding	- && - && PF16062:Domain of unknown function (DUF4804)	-
FBgn0025827	337.093	396.683	228.903	199.853	366.888	214.378	0.774778	0.0127154	0.185458	CG6421	2R	16872250	16872906	+	600	protein_coding	- && - && PF05497:Destabilase	-
FBgn0004396	175.875	135.677	386.389	230.386	155.776	308.387	-0.984552	0.012744	0.185579	CrebA	3L	15535395	15553214	+	4498	protein_coding	- && P29747.2 RecName: Full=Cyclic AMP response element-binding protein A; Short=cAMP response element-binding protein A; Short=dCREB-A; AltName: Full=Box B-binding factor 2; Short=BBF-2 && PF00170:bZIP transcription factor	bZIP_1
FBgn0030332	2707.21	1286.63	1162.83	949.3	1996.92	1056.06	0.919273	0.012775	0.185735	CG9360	X	11763474	11764590	-	1035	protein_coding	- && D2WKD9.2 RecName: Full=Farnesol dehydrogenase; AltName: Full=NADP+-dependent farnesol dehydrogenase 1; Short=AaSDR-1 && PF00106:short chain dehydrogenase	adh_short
FBgn0050349	650.108	540.409	737.984	1547.93	595.259	1142.96	-0.940987	0.0128198	0.186091	CG30349	2R	8907518	8910885	+	2014	protein_coding	- && - && PF04003:Dip2/Utp12 Family	-
FBgn0036460	557.983	404.732	686.71	986.31	481.358	836.51	-0.796751	0.0128667	0.186434	CG5114	3L	14982835	14984486	+	1500	protein_coding	- && Q13685.2 RecName: Full=Angio-associated migratory cell protein && -	-
FBgn0052656	2030.93	1052.07	1001.68	490.379	1541.5	746.03	1.04717	0.0129135	0.186434	Muc11A	X	12059795	12065144	+	4865	protein_coding	- && - && -	-
FBgn0036187	187.39	151.774	319.549	3125.47	169.582	1722.51	-3.3444	0.012939	0.186434	RIOK1	3L	11646234	11648474	-	2121	protein_coding	- && Q9BRS2.2 RecName: Full=Serine/threonine-protein kinase RIO1; AltName: Full=RIO kinase 1 && PF01163:RIO1 family	-
FBgn0027499	208.328	139.127	372.654	283.125	173.727	327.889	-0.915161	0.0129433	0.186434	wde	2R	10800420	10808938	-	4856	protein_coding	- && - && PF16794:Fibronectin-III type domain	-
FBgn0051414	1611.14	2108.75	1055.7	1287.01	1859.94	1171.36	0.666937	0.0129454	0.186434	Gba1b	3R	23704804	23708512	+	2335	protein_coding	- && Q5R8E3.1 RecName: Full=Glucosylceramidase; AltName: Full=Acid beta-glucosidase; AltName: Full=Beta-glucocerebrosidase; AltName: Full=D-glucosyl-N-acylsphingosine glucohydrolase; Flags: Precursor && PF02055:O-Glycosyl hydrolase family 30	Glyco_hydro_30
FBgn0038126	50.2499	67.8386	10.0717	24.0563	59.0443	17.064	1.79065	0.012987	0.186739	CG8483	3R	13208754	13214465	-	1869	protein_coding	- && C0ITL3.1 RecName: Full=Venom allergen 5; AltName: Full=Antigen 5; AltName: Full=Cysteine-rich venom protein; Short=CRVP; AltName: Allergen=Pac c 3 && PF00188:Cysteine-rich secretory protein family	SCP
novel.68	6.28124	12.6479	0	0	9.46456	0	5.80326	0.0129948	1	-	4	1323457	1325136	-	1600	-	- && Q9VV73.1 RecName: Full=Nuclear RNA export factor 2 && PF03943:TAP C-terminal domain	-
FBgn0031522	122.484	31.0448	8.24052	26.8321	76.7645	17.5363	2.13237	0.0130475	0.187315	CG3285	2L	3330928	3332876	+	1631	protein_coding	- && Q4F7G0.1 RecName: Full=Sugar transporter ERD6-like 2; AltName: Full=Sugar transporter-like protein 3 && PF00083:Sugar (and other) transporter	Sugar_tr
FBgn0263355	406.187	415.08	558.524	847.523	410.634	703.024	-0.775719	0.0131148	0.187985	CG31688	2L	20426199	20447905	+	8619	protein_coding	- && P0AF49.1 RecName: Full=UPF0047 protein YjbQ >P0AF48.1 RecName: Full=UPF0047 protein YjbQ && PF01894:Uncharacterised protein family UPF0047	-
FBgn0035189	10753.5	17152.8	7692.98	9186.74	13953.1	8439.86	0.725271	0.0131354	0.187986	CG9119	3L	1203316	1204795	-	1212	protein_coding	- && Q5U2Q3.1 RecName: Full=Ester hydrolase C11orf54 homolog && PF08925:Domain of Unknown Function (DUF1907)	-
FBgn0069242	1240.54	1208.45	721.503	872.505	1224.5	797.004	0.619583	0.0132486	0.18931	eca	3R	9684469	9685476	-	946	protein_coding	- && Q9I7K5.2 RecName: Full=Transmembrane emp24 domain-containing protein eca; AltName: Full=Protein eclair; Flags: Precursor && PF01105:emp24/gp25L/p24 family/GOLD	-
FBgn0265095	10.4687	8.04865	0	0	9.25869	0	5.77373	0.0133071	1	lncRNA:CR44200	2R	7149795	7150094	+	300	ncRNA	- && - && -	-
FBgn0033366	8064.07	10485.1	5935	6325.89	9274.58	6130.45	0.597253	0.0134329	0.191645	Ance-4	2R	9039728	9042142	-	2008	protein_coding	- && P09470.3 RecName: Full=Angiotensin-converting enzyme; Short=ACE; AltName: Full=Dipeptidyl carboxypeptidase I; AltName: Full=Kininase II; AltName: CD_antigen=CD143; Contains: RecName: Full=Angiotensin-converting enzyme, soluble form; Flags: Precursor && PF01401:Angiotensin-converting enzyme	Peptidase_M2
FBgn0003062	747.468	758.872	985.199	1534.98	753.17	1260.09	-0.742468	0.0134868	0.192114	Fib	2R	23072909	23074725	-	1318	protein_coding	- && Q9W1V3.1 RecName: Full=rRNA 2'-O-methyltransferase fibrillarin; AltName: Full=Histone-glutamine methyltransferase && PF01269:Fibrillarin	-
FBgn0000658	17.7968	47.1421	5.49368	6.47671	32.4695	5.98519	2.43725	0.0135343	0.192218	fj	2R	18232761	18236311	+	3551	protein_coding	- && P54360.2 RecName: Full=Extracellular serine/threonine protein kinase four-jointed; Contains: RecName: Full=Protein four-jointed, secreted isoform && -	-
FBgn0265915	28.2656	44.8425	2.74684	11.1029	36.554	6.92488	2.40022	0.0135362	0.192218	asRNA:CR44704	2R	21070749	21071895	+	1147	ncRNA	- && - && -	-
FBgn0026787	490.984	477.17	301.237	302.555	484.077	301.896	0.681247	0.013592	0.192712	Nhe1	2L	103962	106732	-	2551	protein_coding	- && Q4L208.1 RecName: Full=Sodium/hydrogen exchanger 8; AltName: Full=Na(+)/H(+) exchanger 8; Short=NHE-8; AltName: Full=Solute carrier family 9 member 8 && PF00999:Sodium/hydrogen exchanger family	Na_H_Exchanger
FBgn0031182	605.093	592.15	323.211	412.659	598.622	367.935	0.702286	0.0136354	0.193028	Cyp6t1	X	21517434	21519218	-	1785	protein_coding	- && Q9VRI9.1 RecName: Full=Probable cytochrome P450 6t1; AltName: Full=CYPVIT1 && PF00067:Cytochrome P450	p450
FBgn0032925	316.156	301.249	424.844	660.624	308.703	542.734	-0.813866	0.0136656	0.193029	CG9246	2L	21163641	21166090	+	2391	protein_coding	- && Q9VIF0.1 RecName: Full=Nucleolar complex protein 2 homolog; Short=Protein NOC2 homolog && PF03715:Noc2p family	-
FBgn0035524	191.578	163.273	241.722	474.65	177.425	358.186	-1.01302	0.0136978	0.193029	CG11583	3L	4281504	4282817	-	1253	protein_coding	- && Q9VZE6.2 RecName: Full=Ribosome biogenesis protein BRX1 homolog; AltName: Full=Brix domain-containing protein 2 homolog && PF04427:Brix domain	-
FBgn0014427	15128.4	13667.8	9222.05	10515.4	14398.1	9868.72	0.544952	0.0136988	0.193029	CG11899	3R	29200454	29201770	+	1176	protein_coding	- && Q9VAN0.1 RecName: Full=Probable phosphoserine aminotransferase; Short=PSAT; AltName: Full=Phosphohydroxythreonine aminotransferase && PF00266:Aminotransferase class-V	Aminotran_5
FBgn0000042	9724.41	6918.39	17263	10941	8321.4	14102	-0.760971	0.0138745	0.194662	Act5C	X	5900861	5905399	+	2978	protein_coding	- && P10987.4 RecName: Full=Actin-5C; Flags: Precursor >P84184.1 RecName: Full=Actin-A3b, cytoplasmic; Flags: Precursor >P84185.1 RecName: Full=Actin-5C; AltName: Full=Actin-1D, cytoplasmic; Flags: Precursor >P84183.1 RecName: Full=Actin, cytoplasmic A4; Flags: Precursor && PF00022:Actin	Actin
FBgn0036364	115.156	101.183	42.1182	53.6641	108.17	47.8912	1.17604	0.0138805	0.194662	CG14109	3L	13440910	13442420	+	948	protein_coding	- && - && -	-
FBgn0030799	360.124	458.773	159.317	272.947	409.449	216.132	0.921567	0.0138926	0.194662	CG4872	X	16881347	16882790	+	1283	protein_coding	- && - && PF02423:Ornithine cyclodeaminase/mu-crystallin family	OCD_Mu_crystall
FBgn0026374	82.703	63.2394	249.047	106.403	72.9712	177.725	-1.28337	0.0138999	0.194662	Rhp	X	15788897	15793632	+	2536	protein_coding	- && Q6DJJ6.1 RecName: Full=Rhophilin-2-A; AltName: Full=GTP-Rho-binding protein 2-A && PF03097:BRO1-like domain|PF02185:Hr1 repeat|PF00595:PDZ domain (Also known as DHR or GLGF)	PDZ
FBgn0041630	923.342	1090.02	531.971	713.363	1006.68	622.667	0.692953	0.0140163	0.195934	Hexo1	3L	4288641	4291211	+	2211	protein_coding	- && P49010.1 RecName: Full=Chitooligosaccharidolytic beta-N-acetylglucosaminidase; AltName: Full=Beta-GlcNAcase; AltName: Full=Beta-N-acetylhexosaminidase; AltName: Full=Beta-hexosaminidase; Flags: Precursor && PF00728:Glycosyl hydrolase family 20, catalytic domain|PF14845:beta-acetyl hexosaminidase like	Glyco_hydro_20
novel.16	55.4843	55.1907	114.452	123.057	55.3375	118.755	-1.1016	0.0140336	0.195934	-	2R	3801160	3802415	+	1199	-	- && - && -	-
FBgn0003885	702.452	766.921	1175.65	1056.63	734.686	1116.14	-0.603477	0.0140723	0.196176	alphaTub84D	3R	7530753	7532732	+	1980	protein_coding	- && P06605.1 RecName: Full=Tubulin alpha-3 chain && PF03953:Tubulin C-terminal domain|PF00091:Tubulin/FtsZ family, GTPase domain	Tubulin
FBgn0052681	59.6718	87.3853	22.8903	30.533	73.5285	26.7117	1.45985	0.0141419	0.196846	CG32681	X	10376651	10381352	-	4702	protein_coding	- && - && -	-
FBgn0061476	27.2187	17.2471	92.4769	47.1874	22.2329	69.8322	-1.64819	0.0143457	0.199379	Zwilch	3R	31210966	31213376	-	2232	protein_coding	- && Q9VA00.1 RecName: Full=Protein zwilch && PF09817:Uncharacterized conserved protein (DUF2352)	-
FBgn0022702	108.875	108.082	54.0212	43.4865	108.478	48.7538	1.15371	0.0143954	0.199766	Cht2	3L	1752328	1755934	-	3038	protein_coding	- && Q9W092.1 RecName: Full=Probable chitinase 2; Flags: Precursor && PF00704:Glycosyl hydrolases family 18	-
FBgn0039562	12008.7	9837.75	7235.17	7596.25	10923.2	7415.71	0.558768	0.0144661	0.200443	Gp93	3R	27948711	27952151	+	2841	protein_coding	- && Q66HD0.2 RecName: Full=Endoplasmin; AltName: Full=94 kDa glucose-regulated protein; Short=GRP-94; AltName: Full=Heat shock protein 90 kDa beta member 1; Flags: Precursor && PF00183:Hsp90 protein|PF02518:Histidine kinase-, DNA gyrase B-, and HSP90-like ATPase	HATPase_c
FBgn0037956	509.827	635.843	358.005	350.667	572.835	354.336	0.692625	0.0146575	0.202676	CG6959	3R	11822702	11869460	-	3050	protein_coding	- && - && PF13855:Leucine rich repeat	-
FBgn0031397	582.062	613.997	379.979	384.901	598.029	382.44	0.644884	0.0146716	0.202676	CG15385	2L	2209574	2212571	-	2635	protein_coding	- && - && PF00328:Histidine phosphatase superfamily (branch 2)	Acid_phosphat_A
FBgn0039003	197.859	186.269	189.532	807.738	192.064	498.635	-1.37627	0.0147032	0.202806	wfs1	3R	22687542	22690380	-	2671	protein_coding	- && - && -	-
FBgn0264978	1538.9	1398.16	946.744	1023.32	1468.53	985.032	0.576235	0.0148502	0.204525	Slh	2L	2488197	2492671	-	4220	protein_coding	- && Q24179.4 RecName: Full=Protein sly1 homolog && PF00995:Sec1 family	Sec1
FBgn0029148	269.046	347.242	434.001	655.998	308.144	544.999	-0.823149	0.0148928	0.204803	NHP2	3L	14801328	14802168	-	781	protein_coding	- && Q9V3U2.1 RecName: Full=H/ACA ribonucleoprotein complex subunit 2-like protein; AltName: Full=H/ACA snoRNP protein NHP2; AltName: Full=Nucleolar protein family A member 2-like protein && PF01248:Ribosomal protein L7Ae/L30e/S12e/Gadd45 family	-
FBgn0032781	353.843	405.882	494.431	886.383	379.862	690.407	-0.862142	0.01503	0.206078	RtcB	2L	19430643	19432444	+	1742	protein_coding	- && Q9VIW7.1 RecName: Full=tRNA-splicing ligase RtcB homolog && PF01139:tRNA-splicing ligase RtcB	-
FBgn0030170	1.04687	0	41.2026	0.925244	0.523437	21.0639	-5.27428	0.0150566	0.206078	CG2990	X	10010481	10014279	+	3683	protein_coding	- && E1BMP7.3 RecName: Full=DNA replication ATP-dependent helicase/nuclease DNA2; AltName: Full=DNA replication ATP-dependent helicase-like homolog; Includes: RecName: Full=DNA replication nuclease DNA2; Includes: RecName: Full=DNA replication ATP-dependent helicase DNA2 && PF13086:AAA domain|PF08696:DNA replication factor Dna2|PF13087:AAA domain	-
FBgn0053113	3308.12	3623.04	5087.15	4901.02	3465.58	4994.08	-0.527167	0.0150751	0.206078	Rtnl1	2L	4992808	5009720	-	4841	protein_coding	- && Q99P72.2 RecName: Full=Reticulon-4; AltName: Full=Neurite outgrowth inhibitor; Short=Nogo protein && PF02453:Reticulon	-
FBgn0265737	0	3.44942	16.481	24.0563	1.72471	20.2687	-3.58773	0.0150774	0.206078	lncRNA:CR44544	3L	10784590	10785360	+	506	ncRNA	- && - && -	-
FBgn0036652	1.04687	2.29961	24.7215	12.0282	1.67324	18.3749	-3.47029	0.0151294	0.206078	CG13032	3L	16673964	16676264	+	2187	protein_coding	- && - && -	-
FBgn0086613	120.39	127.629	198.688	259.993	124.009	229.341	-0.88724	0.0151363	0.206078	Ino80	3R	19368995	19403153	-	5243	protein_coding	- && Q9VDY1.2 RecName: Full=Putative DNA helicase Ino80; Short=dINO80 && PF00271:Helicase conserved C-terminal domain|PF13892:DNA-binding domain|PF00176:SNF2 family N-terminal domain	SNF2_N
FBgn0052040	93.1717	164.422	46.6963	62.9166	128.797	54.8064	1.23149	0.0151646	0.206078	CG32040	3L	9354033	9355457	+	1364	protein_coding	- && - && -	-
FBgn0263599	888.795	842.808	1052.04	2084.57	865.802	1568.31	-0.857037	0.0151657	0.206078	l(3)72Ab	3L	15960836	15967872	-	6707	protein_coding	- && Q9VUV9.4 RecName: Full=Putative U5 small nuclear ribonucleoprotein 200 kDa helicase; AltName: Full=Protein lethal (3) 72Ab && PF02889:Sec63 Brl domain|PF00271:Helicase conserved C-terminal domain|PF00270:DEAD/DEAH box helicase	Sec63
FBgn0034126	466.906	433.477	224.325	307.181	450.191	265.753	0.760668	0.015195	0.20617	jtb	2R	16432244	16433183	+	822	protein_coding	- && - && PF06757:Insect allergen related repeat, nitrile-specifier detoxification	-
FBgn0015778	560.077	607.098	1403.63	723.541	583.588	1063.59	-0.866036	0.0152374	0.206438	rin	3R	13647004	13654527	+	5711	protein_coding	- && Q5R9L3.1 RecName: Full=Ras GTPase-activating protein-binding protein 2; Short=G3BP-2; AltName: Full=GAP SH3 domain-binding protein 2 >Q9UN86.2 RecName: Full=Ras GTPase-activating protein-binding protein 2; Short=G3BP-2; AltName: Full=GAP SH3 domain-binding protein 2 && PF02136:Nuclear transport factor 2 (NTF2) domain|PF00076:RNA recognition motif. (a.k.a. RRM, RBD, or RNP domain)	RRM_1
FBgn0037368	46.0624	36.7938	103.464	89.7486	41.4281	96.6064	-1.22002	0.0153971	0.208091	CG1239	3R	5733513	5734702	+	1058	protein_coding	- && Q9VNH1.2 RecName: Full=Probable RNA methyltransferase CG1239 && PF06859:Bicoid-interacting protein 3 (Bin3)	-
FBgn0265443	1.04687	5.74903	6.40929	58.2903	3.39795	32.3498	-3.2658	0.0154049	0.208091	lncRNA:CR44343	2R	13254495	13255496	-	1002	ncRNA	- && - && -	-
FBgn0000477	981.967	2069.65	601.558	958.552	1525.81	780.055	0.967726	0.0154288	0.208106	DNaseII	3R	18019375	18021161	+	1228	protein_coding	- && Q75WF2.1 RecName: Full=Plancitoxin-1; AltName: Full=Plancitoxin I; Short=Plan-I; Contains: RecName: Full=Plancitoxin-1 subunit alpha; Contains: RecName: Full=Plancitoxin-1 subunit beta; Flags: Precursor && PF03265:Deoxyribonuclease II	-
FBgn0031494	39.7812	33.3444	81.4895	94.3748	36.5628	87.9322	-1.2647	0.0155546	0.209494	CG17219	2L	3029253	3030616	+	1253	protein_coding	- && Q2KIJ2.1 RecName: Full=Histidine protein methyltransferase 1 homolog; AltName: Full=Methyltransferase-like protein 18 && PF10294:Lysine methyltransferase	-
FBgn0039641	258.578	318.496	159.317	171.17	288.537	165.243	0.803679	0.0155779	0.2095	CG14511	3R	29145678	29146893	-	1216	protein_coding	- && Q9W429.1 RecName: Full=UDP-xylose and UDP-N-acetylglucosamine transporter; AltName: Full=ER GDP-fucose transporter; AltName: Full=Solute carrier family 35 member B4 homolog && PF08449:UAA transporter family	-
FBgn0039449	2.09375	0	35.7089	4.62622	1.04687	20.1676	-4.23328	0.015605	0.209557	CG6425	3R	26715165	26717389	-	2101	protein_coding	- && - && -	-
FBgn0051370	176.922	150.625	244.469	355.294	163.773	299.881	-0.872057	0.015721	0.210508	CG31370	3R	25302464	25303986	+	1408	protein_coding	- && - && PF02958:Ecdysteroid kinase	-
FBgn0030081	103.64	109.232	172.135	233.161	106.436	202.648	-0.929164	0.0157219	0.210508	CG7246	X	9078823	9081057	-	2043	protein_coding	- && - && PF08640:U3 small nucleolar RNA-associated protein 6	-
FBgn0286198	2904.03	2504.28	1279.11	2018.88	2704.15	1649	0.713659	0.0158825	0.212347	LKRSDH	2L	7791175	7795959	-	3495	protein_coding	- && A8E657.1 RecName: Full=Alpha-aminoadipic semialdehyde synthase, mitochondrial; AltName: Full=LKR/SDH; Includes: RecName: Full=Lysine ketoglutarate reductase; Short=LKR; Short=LOR; Includes: RecName: Full=Saccharopine dehydrogenase; Short=SDH; Flags: Precursor && PF05222:Alanine dehydrogenase/PNT, N-terminal domain|PF16653:Saccharopine dehydrogenase C-terminal domain|PF03435:Saccharopine dehy…	Saccharop_dh
FBgn0027611	12444.2	17600.1	8910.74	10408.1	15022.1	9659.41	0.63706	0.0159234	0.212584	LManII	2L	10457658	10462472	+	3633	protein_coding	- && O09159.4 RecName: Full=Lysosomal alpha-mannosidase; Short=Laman; AltName: Full=Lysosomal acid alpha-mannosidase; AltName: Full=Mannosidase alpha class 2B member 1; AltName: Full=Mannosidase alpha-B; Flags: Precursor && PF09261:Alpha mannosidase, middle domain|PF07748:Glycosyl hydrolases family 38 C-terminal domain|PF01074:Glycosyl hydrolases family 38 N-terminal domain	-
FBgn0259209	294.171	425.428	201.435	207.255	359.8	204.345	0.815504	0.0159557	0.212704	Mlp60A	2R	24074602	24078223	+	2839	protein_coding	- && Q24400.1 RecName: Full=Muscle LIM protein Mlp84B && PF00412:LIM domain	LIM
FBgn0038172	12280.9	7459.95	6163.91	5936.36	9870.41	6050.13	0.706186	0.0160357	0.213459	Adgf-D	3R	13703084	13705402	-	1613	protein_coding	- && Q5RC46.1 RecName: Full=Adenosine deaminase CECR1; AltName: Full=Cat eye syndrome critical region protein 1; Flags: Precursor && PF08451:Adenosine/AMP deaminase N-terminal|PF00962:Adenosine/AMP deaminase	-
FBgn0037290	131.906	239.16	100.717	68.468	185.533	84.5927	1.13181	0.0161294	0.214394	CG1124	3R	4965445	4968485	+	1116	protein_coding	- && - && PF06585:Haemolymph juvenile hormone binding protein (JHBP)	-
FBgn0011260	158.078	165.572	349.764	238.713	161.825	294.238	-0.862793	0.0161802	0.214595	Sema2a	2R	16500178	16533459	+	4171	protein_coding	- && Q24323.2 RecName: Full=Semaphorin-2A; AltName: Full=Semaphorin-II; Short=Sema II; Flags: Precursor && PF01403:Sema domain	Sema
FBgn0033471	165.406	188.568	247.215	422.836	176.987	335.026	-0.92093	0.0161914	0.214595	CG12134	2R	9971143	9972780	+	1581	protein_coding	- && Q5RBZ3.1 RecName: Full=WD repeat-containing protein 89 && -	-
FBgn0037530	4272.29	4596.93	2425.46	3346.61	4434.61	2886.03	0.619712	0.0162359	0.214873	EMC1	3R	7903030	7907363	-	3292	protein_coding	- && Q6NRB9.1 RecName: Full=ER membrane protein complex subunit 1; Flags: Precursor && PF07774:Protein of unknown function (DUF1620)	-
FBgn0022213	340.234	381.736	471.541	816.99	360.985	644.265	-0.835867	0.0163939	0.216509	Cse1	2L	16821156	16825207	-	3237	protein_coding	- && Q9XZU1.2 RecName: Full=Exportin-2; Short=Exp2; AltName: Full=Cellular apoptosis susceptibility protein homolog; AltName: Full=Importin-alpha re-exporter && PF03378:CAS/CSE protein, C-terminus|PF08506:Cse1|PF03810:Importin-beta N-terminal domain	-
FBgn0031114	300.453	221.913	327.789	737.419	261.183	532.604	-1.02747	0.0164069	0.216509	cactin	X	20424069	20426402	+	2334	protein_coding	- && Q9VR99.3 RecName: Full=Cactin; AltName: Full=Cactus-interacting protein && PF10312:Conserved mid region of cactin|PF09732:Cactus-binding C-terminus of cactin protein	-
FBgn0284220	231.359	265.605	402.87	408.032	248.482	405.451	-0.706864	0.0164708	0.21704	Top2	2L	19447365	19453490	-	5242	protein_coding	- && P15348.1 RecName: Full=DNA topoisomerase 2; AltName: Full=DNA topoisomerase II && PF16898:C-terminal associated domain of TOPRIM|PF00204:DNA gyrase B|PF02518:Histidine kinase-, DNA gyrase B-, and HSP90-like ATPase|PF01751:Toprim domain|PF00521:DNA gyrase/topoisomerase IV, subunit A	DNA_gyraseB
FBgn0266448	366.406	523.162	236.228	279.424	444.784	257.826	0.786177	0.0167462	0.220351	CG45078	3R	10773339	10777374	-	1925	protein_coding	- && - && -	-
FBgn0034558	30.3593	58.6401	13.7342	10.1777	44.4997	11.9559	1.89387	0.0167944	0.220499	Cib2	2R	20879930	20882663	+	947	protein_coding	- && Q9Z309.1 RecName: Full=Calcium and integrin-binding family member 2; AltName: Full=Kinase-interacting protein 2; Short=KIP 2 && PF13499:EF-hand domain pair	-
FBgn0264745	14.6562	11.4981	0.915613	0	13.0771	0.457806	4.83031	0.0168028	1	CR44003	2L	3171035	3172799	-	1709	pseudogene	- && - && PF07776:Zinc-finger associated domain (zf-AD)	zf-AD
FBgn0014022	82.703	79.3367	135.511	188.75	81.0198	162.13	-1.0005	0.016827	0.220499	Rlb1	3R	9513327	9514827	+	1444	protein_coding	- && - && -	-
FBgn0000053	106548	45973.9	35983.6	45379.5	76260.7	40681.5	0.906571	0.0168413	0.220499	Gart	2L	7014623	7023898	-	4780	protein_coding	- && P00967.2 RecName: Full=Trifunctional purine biosynthetic protein adenosine-3; Includes: RecName: Full=Phosphoribosylamine--glycine ligase; AltName: Full=Glycinamide ribonucleotide synthetase; Short=GARS; AltName: Full=Phosphoribosylglycinamide synthetase; Includes: RecName: Full=Phosphoribosylformylglycinamidine cyclo-ligase; AltName: Full=AIR synthase; Short=AIRS; AltName: Full=Phosphoribos…	-
FBgn0259228	840.639	912.946	589.655	571.801	876.793	580.728	0.59425	0.0168539	0.220499	C3G	X	6780790	6803593	-	8829	protein_coding	- && O77086.4 RecName: Full=Guanine nucleotide-releasing factor 2; AltName: Full=CRK SH3-binding GNRP; Short=DC3G && PF00618:RasGEF N-terminal motif|PF00617:RasGEF domain	-
FBgn0034588	1.04687	1.14981	29.2996	5.55146	1.09834	17.4255	-3.98986	0.0168915	0.220676	CG9394	2R	21118394	21120705	+	2312	protein_coding	- && - && PF00686:Starch binding domain|PF03009:Glycerophosphoryl diester phosphodiesterase family	-
FBgn0022981	1.04687	1.14981	55.8524	0	1.09834	27.9262	-4.66975	0.0169489	0.22111	rpk	3R	4645981	4648884	+	2536	protein_coding	- && Q86LG1.2 RecName: Full=Pickpocket protein 28; Short=PPK28 && PF00858:Amiloride-sensitive sodium channel	-
FBgn0031597	6.28124	16.0973	41.2026	45.3369	11.1893	43.2698	-1.95931	0.0170557	0.222186	CG17612	2L	4380722	4382735	-	1979	protein_coding	- && - && PF07776:Zinc-finger associated domain (zf-AD)	zf-AD
FBgn0036330	0	0	22.8903	0.925244	0	11.9078	-5.88302	0.0171217	1	CG11263	3L	13006817	13007881	+	1065	protein_coding	- && Q9VU31.1 RecName: Full=Protein Exd1 homolog; Short=DmExd1; AltName: Full=Exonuclease 3'-5' domain-containing protein 1 homolog; AltName: Full=Exonuclease 3'-5' domain-like-containing protein 1 homolog && -	-
FBgn0034275	138.187	77.037	179.46	272.947	107.612	226.203	-1.06976	0.0171989	0.223732	CG5002	2R	17750293	17753214	+	1998	protein_coding	- && Q86WA9.2 RecName: Full=Sodium-independent sulfate anion transporter; AltName: Full=Solute carrier family 26 member 11 && PF00916:Sulfate permease family	Sulfate_transp
FBgn0051739	509.827	680.685	868.917	1029.8	595.256	949.356	-0.673882	0.0173391	0.225236	AspRS-m	2L	16827078	16832093	+	4422	protein_coding	- && Q8BIP0.1 RecName: Full=Aspartate--tRNA ligase, mitochondrial; AltName: Full=Aspartyl-tRNA synthetase; Short=AspRS; Flags: Precursor && PF01336:OB-fold nucleic acid binding domain|PF00152:tRNA synthetases class II (D, K and N)	tRNA-synt_2
FBgn0010770	179.015	165.572	235.313	423.762	172.294	329.537	-0.935267	0.0174102	0.225563	ppan	3R	21116254	21117899	+	1477	protein_coding	- && Q9VDE5.1 RecName: Full=Protein Peter pan && PF04427:Brix domain	-
FBgn0053158	188.437	117.28	287.502	2067.92	152.859	1177.71	-2.94556	0.0174136	0.225563	CG33158	3L	16419597	16496560	+	3436	protein_coding	- && Q7Z2Z2.2 RecName: Full=Elongation factor-like GTPase 1; AltName: Full=Elongation factor Tu GTP-binding domain-containing protein 1; AltName: Full=Elongation factor-like 1; AltName: Full=Protein FAM42A && PF14492:Elongation Factor G, domain II|PF00679:Elongation factor G C-terminus|PF03144:Elongation factor Tu domain 2|PF00009:Elongation factor Tu GTP binding domain	GTP_EFTU
FBgn0014865	253.343	140.276	408.363	335.863	196.81	372.113	-0.917487	0.0174676	0.225658	Mtk	2R	15408846	15409113	+	268	protein_coding	- && Q24395.1 RecName: Full=Metchnikowin; Flags: Precursor && -	-
FBgn0085434	413.515	363.339	217	253.517	388.427	235.259	0.723727	0.0174703	0.225658	NaCP60E	2R	24891614	24921677	+	15625	protein_coding	- && Q9W0Y8.5 RecName: Full=Sodium channel protein 60E; AltName: Full=Drosophila ion channel 60; AltName: Full=Drosophila sodium channel 1; AltName: Full=Protein smell-impaired 60E; AltName: Full=Sodium channel 2; Short=DmNav2 && PF16905:Voltage-dependent L-type calcium channel, IQ-associated|PF00520:Ion transport protein	Ion_trans
FBgn0083945	0	27.5954	0	0	13.7977	0	6.34645	0.0175158	1	CG34109	2L	10094088	10125736	+	2551	protein_coding	- && - && PF04087:Domain of unknown function (DUF389)	-
FBgn0031097	54.4374	60.9397	24.7215	12.9534	57.6886	18.8375	1.61384	0.0175385	0.225977	obst-A	X	20239855	20243209	+	1905	protein_coding	- && - && PF01607:Chitin binding Peritrophin-A domain	CBM_14
FBgn0033440	24.0781	31.0448	4.57806	6.47671	27.5614	5.52738	2.31753	0.0175444	0.225977	CG10459	2R	9707536	9708722	+	1187	protein_coding	- && Q5XIG8.1 RecName: Full=Serine-threonine kinase receptor-associated protein; AltName: Full=UNR-interacting protein && PF00400:WD domain, G-beta repeat	WD40
FBgn0013674	228856	320450	177373	184843	274653	181108	0.600754	0.0176255	0.226703	mt:CoI	mitochondrion_genome	1474	3009	+	1536	protein_coding	- && P00399.2 RecName: Full=Cytochrome c oxidase subunit 1; AltName: Full=Cytochrome c oxidase polypeptide I && -	-
FBgn0002031	2135.62	2671	3241.27	4111.78	2403.31	3676.53	-0.61342	0.0177021	0.227368	l(2)37Cc	2L	19121345	19123869	-	2119	protein_coding	- && P24156.2 RecName: Full=Protein l(2)37Cc && PF01145:SPFH domain / Band 7 family	-
FBgn0019686	143.422	128.778	456.891	162.843	136.1	309.867	-1.18683	0.0177711	0.227933	lok	2L	20061422	20064381	+	2439	protein_coding	- && O61267.1 RecName: Full=Ovarian-specific serine/threonine-protein kinase Lok; AltName: Full=Protein loki; AltName: Full=dMNK && PF00498:FHA domain|PF00069:Protein kinase domain	Pkinase
FBgn0267026	19.8906	36.7938	2.74684	7.40195	28.3422	5.07439	2.48097	0.0178463	0.228578	CR45470	2R	13410269	13410591	-	323	pseudogene	- && - && -	-
FBgn0038610	540.187	515.113	368.076	283.125	527.65	325.6	0.696493	0.0179412	0.229015	CG7675	3R	18378124	18381178	-	1390	protein_coding	- && Q9HBH5.1 RecName: Full=Retinol dehydrogenase 14; AltName: Full=Alcohol dehydrogenase PAN2; AltName: Full=Short chain dehydrogenase/reductase family 7C member 4 && PF00106:short chain dehydrogenase	adh_short
FBgn0034330	634.405	461.072	354.342	306.256	547.739	330.299	0.730155	0.0179495	0.229015	CG18107	2R	18384567	18384911	+	281	protein_coding	- && P82706.2 RecName: Full=Immune-induced peptide 1; Short=DIM-1; Flags: Precursor && -	-
FBgn0266521	85.8436	81.6363	302.152	105.478	83.7399	203.815	-1.28324	0.0179556	0.229015	stai	2L	6100377	6124653	+	3792	protein_coding	- && P63043.1 RecName: Full=Stathmin-4; AltName: Full=Stathmin-like protein B3; Short=RB3 >P63042.1 RecName: Full=Stathmin-4; AltName: Full=Stathmin-like protein B3; Short=RB3 && PF00836:Stathmin family	-
FBgn0035761	8.37499	5.74903	49.4431	19.4301	7.06201	34.4366	-2.28221	0.0179818	0.22903	RhoGEF4	3L	7321099	7323411	-	2167	protein_coding	- && Q11100.1 RecName: Full=Putative protein tag-52 && PF00621:RhoGEF domain	RhoGEF
FBgn0036126	123.531	151.774	179.46	404.331	137.653	291.896	-1.08486	0.0180332	0.229365	Irbp18	3L	11097446	11098186	-	614	protein_coding	- && - && PF07716:Basic region leucine zipper	bZIP_2
FBgn0050163	53.3905	66.6888	21.9747	21.2806	60.0397	21.6277	1.47222	0.018102	0.229921	Cpr60D	2R	24662682	24663406	-	667	protein_coding	- && - && PF00379:Insect cuticle protein	Chitin_bind_4
FBgn0266347	12.5625	5.74903	109.874	7.40195	9.15576	58.6377	-2.67476	0.0181657	0.230252	nAChRalpha4	3L	23206669	23287448	+	6050	protein_coding	- && P91766.1 RecName: Full=Acetylcholine receptor subunit alpha-like; AltName: Full=MARA1; Flags: Precursor && PF02931:Neurotransmitter-gated ion-channel ligand binding domain|PF02932:Neurotransmitter-gated ion-channel transmembrane region	Neur_chan_LBD
FBgn0032512	591.483	515.113	946.744	774.429	553.298	860.586	-0.637024	0.0181785	0.230252	Bdp1	2L	13371427	13373890	-	2352	protein_coding	- && A6H8Y1.3 RecName: Full=Transcription factor TFIIIB component B'' homolog; AltName: Full=Transcription factor IIIB 150; Short=TFIIIB150; AltName: Full=Transcription factor-like nuclear regulator && PF15963:Myb DNA-binding like	-
FBgn0259789	8.37499	2.29961	84.2364	4.62622	5.3373	44.4313	-3.04881	0.0182338	0.230378	zld	X	19766465	19783548	-	10605	protein_coding	- && - && -	-
FBgn0038020	310.921	205.815	357.089	621.764	258.368	489.426	-0.920823	0.0182388	0.230378	GstD9	3R	12366163	12367564	-	786	protein_coding	- && P20432.1 RecName: Full=Glutathione S-transferase D1; AltName: Full=DDT-dehydrochlorinase && PF00043:Glutathione S-transferase, C-terminal domain|PF02798:Glutathione S-transferase, N-terminal domain	GST_N
FBgn0037719	565.312	520.862	649.17	1361.96	543.087	1005.56	-0.888633	0.0183033	0.230874	bocks	3R	9589468	9591002	-	1535	protein_coding	- && Q709R6.1 RecName: Full=LEM domain-containing protein Bocksbeutel && -	-
FBgn0036627	69.0936	97.7336	38.4557	28.6826	83.4136	33.5691	1.31187	0.0183304	0.230898	Gagr	3L	16394586	16396880	+	2295	protein_coding	- && - && -	-
FBgn0034723	1860.29	1881.08	1052.04	1401.74	1870.69	1226.89	0.60858	0.018388	0.231305	CG13506	2R	22383134	22394015	+	2977	protein_coding	- && - && PF07679:Immunoglobulin I-set domain	I-set
FBgn0027521	13.6094	1.14981	124.523	4.62622	7.37958	64.5748	-3.12024	0.0184599	0.231671	CG3679	X	16303870	16307377	+	3215	protein_coding	- && Q811X6.3 RecName: Full=Lambda-crystallin homolog; AltName: Full=L-gulonate 3-dehydrogenase; Short=Gul3DH && PF00725:3-hydroxyacyl-CoA dehydrogenase, C-terminal domain	-
FBgn0263106	9606.11	11387.7	2447.43	7686	10496.9	5066.72	1.05084	0.0184678	0.231671	DnaJ-1	3L	5750029	5752189	-	2161	protein_coding	- && Q24133.3 RecName: Full=DnaJ protein homolog 1; Short=DROJ1 && PF01556:DnaJ C terminal domain|PF00226:DnaJ domain	DnaJ_C
FBgn0001296	1127.48	1029.08	1671.91	1502.6	1078.28	1587.25	-0.557693	0.0185508	0.232394	kar	3R	12682186	12689367	-	2678	protein_coding	- && Q91Y77.1 RecName: Full=Monocarboxylate transporter 10; Short=MCT 10; AltName: Full=Aromatic amino acid transporter 1; AltName: Full=Solute carrier family 16 member 10; AltName: Full=T-type amino acid transporter 1 && PF07690:Major Facilitator Superfamily	MFS_1
FBgn0038296	2.09375	10.3483	34.7933	30.533	6.221	32.6632	-2.40639	0.0185858	0.232513	CG6752	3R	15191058	15196210	-	4431	protein_coding	- && Q5XPI3.1 RecName: Full=E3 ubiquitin-protein ligase RNF123; AltName: Full=Kip1 ubiquitination-promoting complex protein 1; AltName: Full=RING finger protein 123 && PF13920:Zinc finger, C3HC4 type (RING finger)|PF00622:SPRY domain	SPRY
FBgn0039638	6.28124	12.6479	52.1899	26.8321	9.46456	39.511	-2.06818	0.0186369	0.232625	dgt6	3R	29128584	29130972	-	2196	protein_coding	- && - && PF14661:HAUS augmin-like complex subunit 6 N-terminus	-
FBgn0038279	18.8437	31.0448	84.2364	55.5146	24.9442	69.8755	-1.48971	0.0186456	0.232625	Sdr	3R	14918628	14923083	+	4074	protein_coding	- && Q93105.2 RecName: Full=Insulin-like receptor; Short=MIR; Contains: RecName: Full=Insulin-like receptor alpha chain; Contains: RecName: Full=Insulin-like receptor beta chain; Flags: Precursor && PF01030:Receptor L domain|PF00757:Furin-like cysteine rich region	-
FBgn0030054	85.8436	74.7374	223.41	120.282	80.2905	171.846	-1.09735	0.0186986	0.232679	Caf1-180	X	8602137	8606304	-	4043	protein_coding	- && A0JMK9.1 RecName: Full=Chromatin assembly factor 1 subunit A; Short=CAF-1 subunit A; AltName: Full=Chromatin assembly factor I p150 subunit; Short=CAF-I 150 kDa subunit; Short=CAF-I p150 && PF12253:Chromatin assembly factor 1 subunit A|PF15539:CAF1 complex subunit p150, region binding to CAF1-p60 at C-term	-
FBgn0032819	163.312	101.183	212.422	304.405	132.248	258.414	-0.964799	0.0187008	0.232679	CG10463	2L	19758879	19760986	+	1921	protein_coding	- && Q28BT8.2 RecName: Full=tRNA-dihydrouridine(47) synthase [NAD(P)(+)]-like; AltName: Full=tRNA-dihydrouridine synthase 3-like && PF01207:Dihydrouridine synthase (Dus)	Dus
FBgn0000017	166.453	150.625	301.237	247.965	158.539	274.601	-0.792134	0.018834	0.233768	Abl	3L	16615866	16647882	-	12819	protein_coding	- && P00522.3 RecName: Full=Tyrosine-protein kinase Abl; AltName: Full=D-ash; AltName: Full=Protein abelson && PF00017:SH2 domain|PF00018:SH3 domain|PF08919:F-actin binding|PF07714:Protein tyrosine kinase|PF00078:Reverse transcriptase (RNA-dependent DNA polymerase)	Pkinase_Tyr
FBgn0023516	4430.37	4327.87	2874.11	3242.05	4379.12	3058.08	0.518028	0.0188395	0.233768	Pex5	X	1866832	1869061	-	2230	protein_coding	- && Q5ZMQ9.1 RecName: Full=Peroxisomal targeting signal 1 receptor; Short=PTS1 receptor; Short=PTS1R; AltName: Full=PTS1-BP; AltName: Full=Peroxin-5; AltName: Full=Peroxisomal C-terminal targeting signal import receptor; AltName: Full=Peroxisome receptor 1 && PF13414:TPR repeat	-
FBgn0010247	135.047	136.827	236.228	235.937	135.937	236.083	-0.796419	0.0188667	0.233789	Parp	3R	3461351	3587054	-	3112	protein_coding	- && P35875.1 RecName: Full=Poly [ADP-ribose] polymerase; Short=PARP; AltName: Full=NAD(+) ADP-ribosyltransferase; Short=ADPRT; AltName: Full=Poly[ADP-ribose] synthase && PF08063:PADR1 (NUC008) domain|PF00645:Poly(ADP-ribose) polymerase and DNA-Ligase Zn-finger region|PF05406:WGR domain|PF02877:Poly(ADP-ribose) polymerase, regulatory domain|PF00644:Poly(ADP-ribose) polymerase catalytic domain	WGR
FBgn0038827	25.125	11.4981	65.0085	50.8884	18.3115	57.9485	-1.65634	0.0188994	0.233876	Fancd2	3R	20810804	20816190	-	4587	protein_coding	- && Q6IV68.2 RecName: Full=Fanconi anemia group D2 protein homolog; Short=Protein FACD2 && PF14631:Fanconi anaemia protein FancD2 nuclease	-
FBgn0037533	8513.17	8344.15	4512.14	6492.43	8428.66	5502.29	0.615281	0.0189388	0.234048	CD98hc	3R	7974409	7978428	-	2371	protein_coding	- && Q7YQK3.2 RecName: Full=4F2 cell-surface antigen heavy chain; Short=4F2hc; AltName: Full=Solute carrier family 3 member 2; AltName: CD_antigen=CD98 && PF16028:Solute carrier family 3 member 2 N-terminus|PF00128:Alpha amylase, catalytic domain	-
FBgn0033927	309.875	325.395	560.355	3304.97	317.635	1932.66	-2.60516	0.0189824	0.23427	CR10102	2R	14360433	14361780	-	1348	pseudogene	- && - && -	-
FBgn0051453	83.7499	126.479	152.907	295.153	105.114	224.03	-1.09297	0.0190845	0.235212	pch2	3R	8559540	8561764	-	2108	protein_coding	- && Q5XHZ9.1 RecName: Full=Pachytene checkpoint protein 2 homolog; AltName: Full=Thyroid hormone receptor interactor 13; AltName: Full=Thyroid receptor-interacting protein 13; Short=TR-interacting protein 13; Short=TRIP-13 && PF00004:ATPase family associated with various cellular activities (AAA)	AAA
FBgn0014861	62.8124	41.393	183.123	79.571	52.1027	131.347	-1.33229	0.0191413	0.235405	Mcm2	3R	8264970	8267924	+	2898	protein_coding	- && P49735.1 RecName: Full=DNA replication licensing factor Mcm2; AltName: Full=Minichromosome maintenance 2 protein; Short=DmMCM2 && PF14551:MCM N-terminal domain|PF00493:MCM2/3/5 family|PF12619:Mini-chromosome maintenance protein 2	MCM
FBgn0052479	604.046	678.386	1183.89	852.149	641.216	1018.02	-0.667081	0.0191516	0.235405	Usp10	3L	871899	895313	+	8436	protein_coding	- && A5PJS6.1 RecName: Full=Ubiquitin carboxyl-terminal hydrolase 10; AltName: Full=Deubiquitinating enzyme 10; AltName: Full=Ubiquitin thioesterase 10; AltName: Full=Ubiquitin-specific-processing protease 10 && PF00443:Ubiquitin carboxyl-terminal hydrolase	UCH
FBgn0036124	333.953	212.714	358.005	721.69	273.333	539.847	-0.981135	0.0192936	0.236833	CG7839	3L	11074769	11078736	+	3714	protein_coding	- && Q03701.3 RecName: Full=CCAAT/enhancer-binding protein zeta; AltName: Full=CCAAT-box-binding transcription factor; Short=CBF; Short=CCAAT-binding factor && PF03914:CBF/Mak21 family	CBF
FBgn0029968	21.9843	24.1459	0.915613	5.55146	23.0651	3.23354	2.83614	0.0193319	0.236984	Ir7g	X	7884660	7886976	+	1686	protein_coding	- && - && -	-
FBgn0010015	208.328	201.216	112.62	117.506	204.772	115.063	0.831718	0.0194515	0.238131	CanA1	3R	31039374	31046821	+	3064	protein_coding	- && P48456.2 RecName: Full=Serine/threonine-protein phosphatase 2B catalytic subunit 1; AltName: Full=Calmodulin-dependent calcineurin A1 subunit && PF00149:Calcineurin-like phosphoesterase	Metallophos
FBgn0035253	523.437	489.818	650.085	1052	506.627	851.044	-0.748172	0.0195743	0.239314	CG7971	3L	1654247	1665064	-	6510	protein_coding	- && Q8BTI8.3 RecName: Full=Serine/arginine repetitive matrix protein 2 && PF15230:Serine/arginine repetitive matrix protein C-terminus	-
FBgn0039868	103.64	136.827	167.557	326.611	120.234	247.084	-1.03993	0.0196047	0.239366	CG11563	3R	31737035	31737999	+	831	protein_coding	- && - && PF09420:Ribosome biogenesis protein Nop16	-
FBgn0014075	1708.5	1649.97	766.368	1273.14	1679.23	1019.75	0.719639	0.0196819	0.239988	Uggt	3L	18872747	18878245	+	5316	protein_coding	- && Q09332.2 RecName: Full=UDP-glucose:glycoprotein glucosyltransferase; Short=UGT; Short=dUGT; AltName: Full=UDP--Glc:glycoprotein glucosyltransferase; Flags: Precursor && PF06427:UDP-glucose:Glycoprotein Glucosyltransferase|PF01501:Glycosyl transferase family 8	Glyco_transf_8
FBgn0026417	41.8749	52.8911	86.9832	126.758	47.383	106.871	-1.17473	0.0198082	0.241206	Hus1-like	3R	4808336	4812096	-	1169	protein_coding	- && Q8BQY8.1 RecName: Full=Checkpoint protein HUS1; Short=mHUS1 && PF04005:Hus1-like protein	-
FBgn0086347	928.577	895.699	1447.58	1248.15	912.138	1347.87	-0.563318	0.0200598	0.243561	Myo31DF	2L	10491814	10506779	-	4318	protein_coding	- && Q23978.1 RecName: Full=Myosin-IA; Short=MIA; AltName: Full=Brush border myosin IA; Short=BBMIA && PF00063:Myosin head (motor domain)|PF06017:Unconventional myosin tail, actin- and lipid-binding	Myosin_head
FBgn0004107	21.9843	13.7977	82.4052	36.0845	17.891	59.2448	-1.72435	0.0200761	0.243561	Cdk2	3R	20735623	20738414	+	2299	protein_coding	- && P23573.1 RecName: Full=Cyclin-dependent kinase 2; AltName: Full=Cell division control protein 2 cognate && PF00069:Protein kinase domain	Pkinase
FBgn0034382	6723.02	7115	9641.4	9761.32	6919.01	9701.36	-0.487636	0.0201416	0.243561	CG18609	2R	18742517	18743626	-	989	protein_coding	- && Q9JLJ5.1 RecName: Full=Elongation of very long chain fatty acids protein 1; AltName: Full=3-keto acyl-CoA synthase Elovl1; AltName: Full=ELOVL fatty acid elongase 1; Short=ELOVL FA elongase 1; AltName: Full=Very long chain 3-ketoacyl-CoA synthase 1; AltName: Full=Very long chain 3-oxoacyl-CoA synthase 1 && PF01151:GNS1/SUR4 family	ELO
FBgn0265961	65.953	19.5467	0	11.1029	42.7499	5.55146	2.9478	0.020168	0.243561	lncRNA:CR44748	2R	21663160	21663925	+	702	ncRNA	- && - && -	-
FBgn0051814	64.9061	73.5876	23.8059	30.533	69.2469	27.1695	1.34951	0.0201881	0.243561	DIP-kappa	2L	13676860	13717320	-	3986	protein_coding	- && Q26474.1 RecName: Full=Lachesin; Flags: Precursor && PF07679:Immunoglobulin I-set domain	I-set
FBgn0033374	11.5156	11.4981	97.055	13.8787	11.5068	55.4668	-2.26935	0.0201988	0.243561	CG13741	2R	9092506	9094658	-	1933	protein_coding	- && - && -	-
FBgn0032513	465.859	478.32	745.309	683.755	472.089	714.532	-0.598017	0.02021	0.243561	CG6565	2L	13374019	13376404	+	2327	protein_coding	- && - && PF01852:START domain	START
FBgn0261004	20.9375	18.3969	78.7427	40.7107	19.6672	59.7267	-1.60178	0.0202147	0.243561	asl	3R	5603236	5606543	-	3187	protein_coding	- && - && -	-
FBgn0035006	2.09375	2.29961	22.8903	13.8787	2.19668	18.3845	-3.06673	0.020319	0.244289	CG4563	2R	24451084	24453040	-	1766	protein_coding	- && Q26304.1 RecName: Full=Luciferin 4-monooxygenase; Short=Luciferase && PF13193:AMP-binding enzyme C-terminal domain|PF00501:AMP-binding enzyme	AMP-binding
FBgn0263605	155.984	127.629	196.857	354.368	141.806	275.613	-0.958008	0.0203378	0.244289	l(3)72Dn	3L	16226126	16228737	-	2323	protein_coding	- && Q8R2N2.3 RecName: Full=U3 small nucleolar RNA-associated protein 4 homolog; AltName: Full=Cirhin; AltName: Full=Testis-expressed gene 292 protein && -	-
FBgn0040832	398.859	680.685	355.258	221.133	539.772	288.196	0.90473	0.0203552	0.244289	CG8012	3L	8215280	8216198	+	851	protein_coding	- && - && -	-
FBgn0020653	4882.62	5056.85	6538.39	7702.65	4969.73	7120.52	-0.518822	0.0204551	0.245166	Trxr-1	X	8242528	8248033	+	2790	protein_coding	- && P91938.2 RecName: Full=Thioredoxin reductase 1, mitochondrial; Short=TrxR-1; Flags: Precursor && PF07992:Pyridine nucleotide-disulphide oxidoreductase|PF02852:Pyridine nucleotide-disulphide oxidoreductase, dimerisation domain	Pyr_redox_2
FBgn0037853	160.172	256.407	79.6583	124.908	208.289	102.283	1.02528	0.0205508	0.245763	CG14696	3R	10882433	10885001	-	1642	protein_coding	- && - && PF02752:Arrestin (or S-antigen), C-terminal domain|PF00339:Arrestin (or S-antigen), N-terminal domain	-
FBgn0027949	4.18749	1.14981	52.1899	3.70097	2.66865	27.9455	-3.37576	0.0205586	0.245763	msb1l	2L	19577701	19579131	+	1366	protein_coding	- && - && -	-
FBgn0033735	1144.23	1068.17	678.469	801.261	1106.2	739.865	0.580382	0.0207081	0.247226	Dera	2R	12425483	12426975	+	1378	protein_coding	- && Q9Y315.2 RecName: Full=Deoxyribose-phosphate aldolase; Short=DERA; AltName: Full=2-deoxy-D-ribose 5-phosphate aldolase; AltName: Full=Phosphodeoxyriboaldolase; Short=Deoxyriboaldolase && PF01791:DeoC/LacD family aldolase	-
FBgn0004118	36.6406	18.3969	5.49368	5.55146	27.5187	5.52257	2.31913	0.020949	0.249777	nAChRbeta2	3R	24509228	24515106	-	4018	protein_coding	- && P25162.3 RecName: Full=Acetylcholine receptor subunit beta-like 2; AltName: Full=Nicotinic acetylcholine receptor beta 2; Flags: Precursor && PF02932:Neurotransmitter-gated ion-channel transmembrane region|PF02931:Neurotransmitter-gated ion-channel ligand binding domain	Neur_chan_memb
FBgn0033431	1147.37	1340.67	668.397	920.617	1244.02	794.507	0.646794	0.0210008	0.249799	CG1827	2R	9589050	9590443	+	1341	protein_coding	- && Q8MR45.1 RecName: Full=Putative N(4)-(beta-N-acetylglucosaminyl)-L-asparaginase CG1827; AltName: Full=Aspartylglucosaminidase; Short=AGA; AltName: Full=Glycosylasparaginase; AltName: Full=N4-(N-acetyl-beta-glucosaminyl)-L-asparagine amidase; Contains: RecName: Full=Glycosylasparaginase alpha chain; Contains: RecName: Full=Glycosylasparaginase beta chain; Flags: Precursor && PF01112:Asparagin…	Asparaginase_2
FBgn0086356	24.0781	42.5428	265.528	20.3554	33.3105	142.942	-2.10299	0.0210055	0.249799	tum	2R	13856150	13858689	-	2353	protein_coding	- && Q9WVM1.1 RecName: Full=Rac GTPase-activating protein 1; AltName: Full=Male germ cell RacGap; Short=MgcRacGAP && PF00130:Phorbol esters/diacylglycerol binding domain (C1 domain)|PF00620:RhoGAP domain	RhoGAP
FBgn0260965	161.218	132.228	283.84	231.311	146.723	257.575	-0.811134	0.0211151	0.250407	CG42588	3L	12814254	12824650	+	8603	protein_coding	- && - && -	-
FBgn0034073	216.703	172.471	315.886	335.863	194.587	325.875	-0.743046	0.0211355	0.250407	CG8414	2R	16099306	16102608	-	3133	protein_coding	- && A1ZA92.1 RecName: Full=Polynucleotide 5'-hydroxyl-kinase NOL9; AltName: Full=Nucleolar protein 9 homolog && PF16575:mRNA cleavage and polyadenylation factor CLP1 P-loop	-
FBgn0033777	389.437	533.51	666.566	824.392	461.474	745.479	-0.692469	0.0211388	0.250407	CG17574	2R	12849358	12869423	-	3022	protein_coding	- && - && -	-
FBgn0029666	79.5624	71.288	199.604	115.655	75.4252	157.63	-1.06303	0.0211812	0.250585	CG10803	X	3485650	3490915	+	4906	protein_coding	- && - && -	-
FBgn0032001	3491.32	4092.16	2384.26	2801.64	3791.74	2592.95	0.548219	0.0212317	0.250858	CG8360	2L	8212959	8214135	+	787	protein_coding	- && Q9KD53.1 RecName: Full=Cytidine deaminase; Short=CDA; AltName: Full=Cytidine aminohydrolase && PF00383:Cytidine and deoxycytidylate deaminase zinc-binding region	-
FBgn0033782	2304.17	5039.6	1239.74	2469.48	3671.89	1854.61	0.985334	0.021268	0.250962	sug	2R	12924567	12930644	+	1572	protein_coding	- && Q7K0S9.1 RecName: Full=Zinc finger protein GLIS2 homolog; AltName: Full=Protein sugarbabe && PF00096:Zinc finger, C2H2 type	zf-C2H2
novel.10	15.7031	2.29961	0	0	9.00136	0	5.73543	0.0213484	1	-	2L	21570725	21572042	+	255	-	- && - && -	-
FBgn0000057	788.296	994.583	596.98	567.174	891.439	582.077	0.614634	0.0213592	0.251713	adp	2R	18151704	18154060	+	2291	protein_coding	- && Q8N5D0.2 RecName: Full=WD and tetratricopeptide repeats protein 1 && PF00400:WD domain, G-beta repeat|PF13414:TPR repeat	WD40
FBgn0039840	60.7187	25.2957	10.9874	12.0282	43.0072	11.5078	1.90439	0.0214233	0.252144	pHCl-2	3R	31300918	31305384	-	3815	protein_coding	- && O75311.2 RecName: Full=Glycine receptor subunit alpha-3; Flags: Precursor && PF02931:Neurotransmitter-gated ion-channel ligand binding domain|PF02932:Neurotransmitter-gated ion-channel transmembrane region	Neur_chan_LBD
FBgn0030589	16.75	8.04865	0	0.925244	12.3993	0.462622	4.7522	0.0214299	1	CG9519	X	14854328	14856361	-	2034	protein_coding	- && P18172.4 RecName: Full=Glucose dehydrogenase [FAD, quinone]; Contains: RecName: Full=Glucose dehydrogenase [FAD, quinone] short protein; Flags: Precursor && PF00732:GMC oxidoreductase|PF05199:GMC oxidoreductase	-
FBgn0050093	27.2187	43.6926	9.15613	9.25244	35.4557	9.20428	1.94407	0.0214845	0.25222	COX6AL	2R	15944028	15944567	+	540	protein_coding	- && P43024.2 RecName: Full=Cytochrome c oxidase subunit 6A1, mitochondrial; AltName: Full=Cytochrome c oxidase polypeptide VIa-liver; Flags: Precursor && -	-
FBgn0030720	551.702	387.485	576.836	1180.61	469.594	878.723	-0.903591	0.0214849	0.25222	CG8939	X	15997016	15999698	+	2622	protein_coding	- && Q9DBE9.1 RecName: Full=pre-rRNA processing protein FTSJ3; AltName: Full=2'-O-ribose RNA methyltransferase SPB1 homolog; AltName: Full=Protein ftsJ homolog 3; AltName: Full=Putative rRNA methyltransferase 3 && PF01728:FtsJ-like methyltransferase|PF11861:Domain of unknown function (DUF3381)|PF07780:Spb1 C-terminal domain	-
FBgn0264695	5617.52	7195.49	4721.82	3809.23	6406.51	4265.52	0.586764	0.0215451	0.252602	Mhc	2L	16766566	16788766	+	9058	protein_coding	- && P05661.4 RecName: Full=Myosin heavy chain, muscle && PF00063:Myosin head (motor domain)|PF01576:Myosin tail|PF02736:Myosin N-terminal SH3-like domain	Myosin_head
FBgn0085391	0	0	18.3123	1.85049	0	10.0814	-5.64282	0.0215857	1	trv	3R	28026615	28090740	+	9239	protein_coding	- && P31483.3 RecName: Full=Nucleolysin TIA-1 isoform p40; AltName: Full=RNA-binding protein TIA-1; AltName: Full=T-cell-restricted intracellular antigen-1; Short=TIA-1; AltName: Full=p40-TIA-1 && PF00076:RNA recognition motif. (a.k.a. RRM, RBD, or RNP domain)	RRM_1
FBgn0029932	1977.54	2341.01	1581.26	1336.05	2159.27	1458.66	0.565792	0.0217499	0.254677	CG4607	X	7069413	7072689	+	2603	protein_coding	- && A5LGM7.1 RecName: Full=Facilitated trehalose transporter Tret1; Short=PvTret1 && PF00083:Sugar (and other) transporter	Sugar_tr
FBgn0039972	8.37499	3.44942	341.524	4.62622	5.9122	173.075	-4.86925	0.0220118	0.257414	Marf1	2L	22308755	22368796	+	5366	protein_coding	- && E1BP74.2 RecName: Full=Meiosis arrest female protein 1; AltName: Full=Limkain-b1 && PF12872:OST-HTH/LOTUS domain	-
FBgn0030595	199.953	419.679	42.1182	185.049	309.816	113.583	1.44741	0.0221285	0.258022	CG14406	X	14909873	14910845	-	667	protein_coding	- && - && -	-
FBgn0284436	1034.31	1001.48	1324.89	1757.96	1017.9	1541.43	-0.598622	0.0221435	0.258022	CCT8	2R	8904844	8906990	-	1904	protein_coding	- && Q6EE31.3 RecName: Full=T-complex protein 1 subunit theta; Short=TCP-1-theta; AltName: Full=CCT-theta && PF00118:TCP-1/cpn60 chaperonin family	-
FBgn0263219	377.921	239.16	184.954	157.291	308.541	171.123	0.851204	0.0221484	0.258022	Dscam4	3L	8238647	8282398	+	7913	protein_coding	- && Q9VS29.3 RecName: Full=Down syndrome cell adhesion molecule-like protein Dscam2; Flags: Precursor && PF13927:Immunoglobulin domain|PF13895:Immunoglobulin domain|PF07679:Immunoglobulin I-set domain|PF00041:Fibronectin type III domain	I-set
FBgn0038211	4416.76	3804.71	2310.09	3132.87	4110.73	2721.48	0.595056	0.0222624	0.25902	CG9649	3R	14215459	14217882	-	1713	protein_coding	- && O62589.2 RecName: Full=Serine protease gd; AltName: Full=Protein gastrulation defective; Flags: Precursor && PF00089:Trypsin|PF16030:Serine protease gd N-terminus	Trypsin
FBgn0013699	144.469	179.37	90.6457	80.4962	161.919	85.5709	0.919367	0.0223134	0.259283	mt:tRNA:Leu-TAA	mitochondrion_genome	3012	3077	+	66	tRNA	- && - && -	-
FBgn0283741	1593.34	1600.53	1068.52	1151	1596.94	1109.76	0.525061	0.0223541	0.259427	prage	X	1773719	1853667	+	6747	protein_coding	- && Q8N1G1.3 RecName: Full=RNA exonuclease 1 homolog; AltName: Full=Elongin-A-binding protein 1; Short=EloA-BP1; AltName: Full=Transcription elongation factor B polypeptide 3-binding protein 1 && -	-
FBgn0036240	86.8905	101.183	137.342	241.489	94.0367	189.415	-1.01076	0.0224072	0.259446	CG6928	3L	12003155	12008051	+	2585	protein_coding	- && Q58DD2.1 RecName: Full=Sodium-independent sulfate anion transporter; AltName: Full=Solute carrier family 26 member 11 && PF00916:Sulfate permease family	Sulfate_transp
FBgn0003346	165.406	216.164	323.211	317.359	190.785	320.285	-0.748391	0.0224125	0.259446	RanGAP	2L	19441959	19447317	+	2401	protein_coding	- && Q9VIW3.1 RecName: Full=Ran GTPase-activating protein; Short=RanGAP; AltName: Full=Protein segregation distorter && -	-
FBgn0000615	48.1562	102.333	283.84	101.777	75.2445	192.808	-1.35964	0.0225016	0.260148	exu	2R	20667427	20671083	-	3290	protein_coding	- && P28750.2 RecName: Full=Maternal protein exuperantia && -	-
FBgn0036742	374.781	379.436	236.228	238.713	377.108	237.47	0.667204	0.0225836	0.260767	CG7497	3L	17633449	17638001	+	1822	protein_coding	- && - && PF00001:7 transmembrane receptor (rhodopsin family)	7tm_1
FBgn0035916	151.797	102.333	211.507	256.292	127.065	233.9	-0.878746	0.0226838	0.261593	GAPsec	3L	8622039	8623901	-	1544	protein_coding	- && Q9NVG8.3 RecName: Full=TBC1 domain family member 13 && PF00566:Rab-GTPase-TBC domain	TBC
FBgn0015371	60.7187	41.393	294.827	43.4865	51.0558	169.157	-1.72736	0.0227258	0.261748	chn	2R	15115236	15144783	+	6256	protein_coding	- && Q7YU81.3 RecName: Full=Protein charlatan && -	-
FBgn0040582	130.859	251.808	357.089	355.294	191.333	356.191	-0.898173	0.0228172	0.262202	CG5791	3R	22087075	22088501	+	1301	protein_coding	- && - && -	-
FBgn0016694	2148.18	1486.7	4392.2	2147.49	1817.44	3269.84	-0.847212	0.0228226	0.262202	Pdp1	3L	7811458	7867369	-	12138	protein_coding	- && Q16534.1 RecName: Full=Hepatic leukemia factor && PF07716:Basic region leucine zipper	bZIP_2
FBgn0052068	3442.12	3421.82	2607.67	2144.71	3431.97	2376.19	0.530379	0.0230384	0.264349	Adi1	3L	10663376	10664435	+	701	protein_coding	- && Q6AWN0.2 RecName: Full=1,2-dihydroxy-3-keto-5-methylthiopentene dioxygenase; AltName: Full=Acireductone dioxygenase (Fe(2+)-requiring); Short=ARD; Short=Fe-ARD && PF03079:ARD/ARD' family	-
FBgn0035734	865.764	1621.23	678.469	765.176	1243.5	721.823	0.784377	0.0231694	0.265519	CG14823	3L	7066314	7069463	+	2339	protein_coding	- && - && PF05497:Destabilase	-
FBgn0002773	4684.76	5865.16	3898.68	3235.58	5274.96	3567.13	0.564338	0.0232287	0.265555	Mlc2	3R	30171438	30174551	-	2286	protein_coding	- && P18432.2 RecName: Full=Myosin regulatory light chain 2; Short=MLC-2 && -	-
FBgn0039302	1386.06	1433.81	1641.69	3176.36	1409.93	2409.03	-0.772823	0.0232363	0.265555	Nup358	3R	25249348	25258672	+	8553	protein_coding	- && Q9ERU9.2 RecName: Full=E3 SUMO-protein ligase RanBP2; AltName: Full=Ran-binding protein 2; Short=RanBP2 && PF00641:Zn-finger in Ran binding protein and others|PF00638:RanBP1 domain	zf-RanBP
FBgn0001250	1405.95	1184.3	923.853	821.616	1295.13	872.735	0.569624	0.0232597	0.265555	if	X	16752189	16783434	-	6011	protein_coding	- && P12080.2 RecName: Full=Integrin alpha-PS2; AltName: Full=Position-specific antigen subunit alpha-2; AltName: Full=Protein inflated; Contains: RecName: Full=Integrin alpha-PS2 heavy chain; Contains: RecName: Full=Integrin alpha-PS2 light chain; Flags: Precursor && PF08441:Integrin alpha|PF01839:FG-GAP repeat	FG-GAP
FBgn0035211	220.89	247.208	114.452	150.815	234.049	132.633	0.819194	0.0234729	0.267655	CG2211	3L	1333239	1335359	-	1941	protein_coding	- && - && -	-
FBgn0264574	47.1093	59.7899	134.595	94.3748	53.4496	114.485	-1.10038	0.0237015	0.269243	Glut1	3L	914074	993788	+	10933	protein_coding	- && Q8IRI6.4 RecName: Full=Glucose transporter type 1; Flags: Precursor && PF00083:Sugar (and other) transporter	Sugar_tr
FBgn0064237	3550.99	4038.12	2197.47	2900.64	3794.56	2549.05	0.57394	0.0237157	0.269243	Idgf5	2R	18393666	18395282	+	1495	protein_coding	- && Q8T0R7.3 RecName: Full=Chitinase-like protein Idgf5; AltName: Full=Imaginal disk growth factor protein 5; Flags: Precursor && PF00704:Glycosyl hydrolases family 18	-
FBgn0037028	197.859	148.325	74.1646	104.553	173.092	89.3586	0.954744	0.0237289	0.269243	CG3618	3L	20813353	20816075	-	2625	protein_coding	- && - && -	-
FBgn0038349	4789.45	3548.3	2397.99	3057	4168.87	2727.5	0.612164	0.0237548	0.269243	AOX3	3R	15542748	15548188	-	4562	protein_coding	- && Q6AUV1.1 RecName: Full=Xanthine dehydrogenase && PF00941:FAD binding domain in molybdopterin dehydrogenase|PF03450:CO dehydrogenase flavoprotein C-terminal domain|PF02738:Molybdopterin-binding domain of aldehyde dehydrogenase|PF01799:[2Fe-2S] binding domain|PF01315:Aldehyde oxidase and xanthine dehydrogenase, a/b hammerhead domain	-
FBgn0010173	772.593	903.748	968.718	2020.73	838.17	1494.73	-0.834646	0.0237593	0.269243	RpA-70	3R	8262120	8264451	-	2135	protein_coding	- && Q24492.1 RecName: Full=Replication protein A 70 kDa DNA-binding subunit; Short=RP-A p70; AltName: Full=Replication factor A protein 1; Short=RF-A protein 1; AltName: Full=Single-stranded DNA-binding protein; Short=DmRPA1 && PF01336:OB-fold nucleic acid binding domain|PF16900:Replication protein A OB domain|PF08646:Replication factor-A C terminal domain|PF04057:Replication factor-A protein 1,…	tRNA_anti
FBgn0010431	8.37499	8.04865	318.633	7.40195	8.21182	163.018	-4.3111	0.0239103	0.26997	mtrm	3L	8413012	8414103	+	1092	protein_coding	- && Q23973.2 RecName: Full=Protein matrimony; AltName: Full=Cell cycle arrest protein D52 && -	-
FBgn0033978	1639.4	1256.74	2231.35	2076.25	1448.07	2153.8	-0.572536	0.0239173	0.26997	Cyp6a23	2R	14875829	14877654	+	1761	protein_coding	- && Q9V771.2 RecName: Full=Probable cytochrome P450 6a23; AltName: Full=CYPVIA23 && PF00067:Cytochrome P450	p450
FBgn0039728	84.7967	93.1343	29.2996	47.1874	88.9655	38.2435	1.21803	0.023927	0.26997	CG7896	3R	29983426	29990785	+	4955	protein_coding	- && - && PF13855:Leucine rich repeat	-
FBgn0037718	2847.5	2453.69	1928.28	1751.49	2650.59	1839.88	0.526772	0.0239416	0.26997	P58IPK	3R	9586942	9589581	+	2217	protein_coding	- && Q27968.1 RecName: Full=DnaJ homolog subfamily C member 3; AltName: Full=Interferon-induced, double-stranded RNA-activated protein kinase inhibitor; AltName: Full=Protein kinase inhibitor of 58 kDa; Short=Protein kinase inhibitor p58; Flags: Precursor && PF13414:TPR repeat|PF00226:DnaJ domain	DnaJ
FBgn0037082	72.2343	109.232	133.679	246.115	90.7329	189.897	-1.06692	0.0242042	0.272595	CG5664	3L	21438628	21441363	-	2630	protein_coding	- && - && -	-
FBgn0038575	11.5156	1.14981	86.0676	7.40195	6.33271	46.7348	-2.87271	0.0242681	0.272979	CG7208	3R	18183656	18185715	-	1744	protein_coding	- && - && PF16012:Domain of unknown function (DUF4780)	-
FBgn0029989	18.8437	5.74903	0.915613	0	12.2964	0.457806	4.74364	0.024282	1	CG15333	X	8019523	8021345	-	1823	protein_coding	- && Q9W3L5.3 RecName: Full=DM7 family protein CG15333 && -	-
FBgn0033549	0	1.14981	30.2152	1.85049	0.574903	16.0329	-4.85372	0.0244864	0.274389	mms4	2R	10811078	10812215	+	1138	protein_coding	- && Q96AY2.2 RecName: Full=Crossover junction endonuclease EME1; AltName: Full=MMS4 homolog; Short=hMMS4 && -	-
FBgn0041164	53.3905	72.4378	178.545	97.1506	62.9142	137.848	-1.13315	0.024507	0.274389	armi	3L	3461317	3466303	+	4151	protein_coding	- && Q6J5K9.4 RecName: Full=Probable RNA helicase armi; AltName: Full=Protein armitage && PF13086:AAA domain|PF13087:AAA domain	-
FBgn0267385	24152.4	37707.9	20638.8	19376.5	30930.2	20007.6	0.628448	0.0245135	0.274389	PyK	3R	22367536	22372746	+	2242	protein_coding	- && O62619.2 RecName: Full=Pyruvate kinase; Short=PK && PF02887:Pyruvate kinase, alpha/beta domain|PF00224:Pyruvate kinase, barrel domain	PK
FBgn0027552	4493.18	6318.19	3828.18	3319.77	5405.68	3573.98	0.596874	0.0245135	0.274389	CG10863	3L	3941008	3942465	-	1089	protein_coding	- && P15122.3 RecName: Full=Aldose reductase; Short=AR; AltName: Full=Aldehyde reductase && PF00248:Aldo/keto reductase family	Aldo_ket_red
FBgn0032298	194.718	203.516	261.865	455.22	199.117	358.543	-0.848568	0.0245777	0.274549	CG6724	2L	10768234	10769952	-	1535	protein_coding	- && Q9VKQ3.1 RecName: Full=Ribosome biogenesis protein WDR12 homolog && PF00400:WD domain, G-beta repeat|PF08154:NLE (NUC135) domain	WD40
FBgn0024187	1805.86	1457.95	1165.58	1038.12	1631.91	1101.85	0.566778	0.0245878	0.274549	syd	3L	7916650	7936120	-	5612	protein_coding	- && Q9GQF1.1 RecName: Full=JNK-interacting protein 3; AltName: Full=Protein sunday driver && PF09744:JNK_SAPK-associated protein-1|PF16471:JNK-interacting protein leucine zipper II	-
FBgn0010395	101.547	56.3405	156.57	164.693	78.9436	160.632	-1.02226	0.0247519	0.276044	Itgbn	2L	21053033	21058044	+	3340	protein_coding	- && Q27591.2 RecName: Full=Integrin beta-nu; Flags: Precursor && PF07974:EGF-like domain|PF00362:Integrin, beta chain|PF08725:Integrin beta cytoplasmic domain	EGF_2
FBgn0034200	15448.7	19615.7	9006.88	13498.4	17532.2	11252.6	0.639735	0.0247896	0.276127	Gbp2	2R	17137240	17139595	+	2279	protein_coding	- && - && -	-
FBgn0261575	3520.64	5377.65	1150.01	3298.49	4449.14	2224.25	1.00018	0.0249569	0.277468	tobi	3R	25344761	25346921	-	2104	protein_coding	- && Q6NSJ0.2 RecName: Full=Uncharacterized family 31 glucosidase KIAA1161 && PF01055:Glycosyl hydrolases family 31	Glyco_hydro_31
FBgn0086251	8.37499	10.3483	89.7301	9.25244	9.36162	49.4913	-2.40396	0.0249937	0.277468	del	2L	21145137	21148546	-	3292	protein_coding	- && Q9VIF5.2 RecName: Full=Protein deadlock && -	-
FBgn0039137	517.155	361.039	245.384	283.125	439.097	264.254	0.733239	0.0250009	0.277468	CG13604	3R	23988806	23992916	-	3259	protein_coding	- && Q9VCE9.1 RecName: Full=Protein UBASH3A homolog && PF00300:Histidine phosphatase superfamily (branch 1)|PF00627:UBA/TS-N domain|PF14604:Variant SH3 domain	UBA
FBgn0010926	208.328	209.265	265.528	500.557	208.796	383.042	-0.875341	0.0251894	0.27908	l(3)07882	3R	17535533	17539963	-	4315	protein_coding	- && Q9VEJ2.2 RecName: Full=Nucleolar protein 14 homolog; AltName: Full=Nucleolar complex protein 14 homolog && PF14748:Pyrroline-5-carboxylate reductase dimerisation|PF04147:Nop14-like family	-
FBgn0032262	539.14	641.592	412.026	346.966	590.366	379.496	0.637202	0.0252072	0.27908	CG7384	2L	10507859	10510453	-	2261	protein_coding	- && - && PF04087:Domain of unknown function (DUF389)	-
FBgn0264706	11.5156	11.4981	0	0.925244	11.5068	0.462622	4.6425	0.0252717	1	CR43975	3R	21216820	21217242	+	423	pseudogene	- && - && -	-
FBgn0037140	334.999	384.035	532.887	569.025	359.517	550.956	-0.616242	0.0253766	0.280615	SLC22A	3L	21934704	21938636	+	2085	protein_coding	- && Q9VCA2.1 RecName: Full=Organic cation transporter protein && PF07690:Major Facilitator Superfamily	MFS_1
FBgn0031736	317.203	271.354	388.22	607.885	294.278	498.052	-0.758711	0.0255057	0.281702	CG11030	2L	5724656	5762420	+	4173	protein_coding	- && Q8NEJ9.1 RecName: Full=Neuroguidin; AltName: Full=Centromere accumulated nuclear protein 1; Short=CANu1; AltName: Full=EIF4E-binding protein && PF04000:Sas10/Utp3/C1D family	-
FBgn0035539	126.672	103.483	183.123	230.386	115.077	206.754	-0.844346	0.0255824	0.282208	slow	3L	4384442	4403181	+	2364	protein_coding	- && Q6MG84.1 RecName: Full=Epidermal growth factor-like protein 8; Short=EGF-like protein 8; Flags: Precursor && PF07546:EMI domain|PF07645:Calcium-binding EGF domain	EGF_CA
FBgn0261862	7215.05	9443.36	13111.6	11330.5	8329.21	12221.1	-0.55316	0.0258917	0.285276	whd	2R	10469473	10478567	-	3175	protein_coding	- && P32198.2 RecName: Full=Carnitine O-palmitoyltransferase 1, liver isoform; Short=CPT1-L; AltName: Full=Carnitine O-palmitoyltransferase I, liver isoform; Short=CPT I; Short=CPTI-L; AltName: Full=Carnitine palmitoyltransferase 1A && PF16484:Carnitine O-palmitoyltransferase N-terminus|PF00755:Choline/Carnitine o-acyltransferase	-
FBgn0013269	659.53	665.738	868.917	1138.97	662.634	1003.95	-0.599385	0.026082	0.287027	Fkbp39	3R	15331584	15333133	-	1299	protein_coding	- && P54397.2 RecName: Full=39 kDa FK506-binding nuclear protein; AltName: Full=Peptidyl-prolyl cis-trans isomerase; Short=PPIase; AltName: Full=Rotamase && PF00254:FKBP-type peptidyl-prolyl cis-trans isomerase	FKBP_C
FBgn0016070	567.405	703.682	2063.79	610.661	635.543	1337.23	-1.07332	0.0262049	0.287451	smg	3L	8990317	8997989	-	5963	protein_coding	- && Q23972.2 RecName: Full=Protein Smaug && PF00536:SAM domain (Sterile alpha motif)|PF09246:PHAT	SAM_1
FBgn0003401	3.14062	4.59923	48.5275	6.47671	3.86992	27.5021	-2.83346	0.0262076	0.287451	shu	2R	23841461	23843286	-	1694	protein_coding	- && Q9W1I9.1 RecName: Full=Inactive peptidyl-prolyl cis-trans isomerase shutdown && PF00254:FKBP-type peptidyl-prolyl cis-trans isomerase	FKBP_C
FBgn0038746	144.469	118.43	194.11	280.349	131.449	237.229	-0.850929	0.0262162	0.287451	Surf6	3R	19903665	19904868	-	1150	protein_coding	- && Q9VDS6.1 RecName: Full=Surfeit locus protein 6 homolog && PF04935:Surfeit locus protein 6	-
FBgn0033638	2969.98	2753.79	1805.59	2173.4	2861.88	1989.49	0.524612	0.0262462	0.287451	CG9005	2R	11619479	11640941	-	6778	protein_coding	- && Q1LV22.2 RecName: Full=Protein FAM214A && PF13915:Domain of unknown function (DUF4210)|PF13889:Chromosome segregation during meiosis	-
FBgn0035640	10.4687	6.89884	63.1773	15.7291	8.68379	39.4532	-2.1806	0.0262812	0.28749	mad2	3L	5812135	5813093	-	818	protein_coding	- && Q13257.1 RecName: Full=Mitotic spindle assembly checkpoint protein MAD2A; Short=HsMAD2; AltName: Full=Mitotic arrest deficient 2-like protein 1; Short=MAD2-like protein 1 && PF02301:HORMA domain	HORMA
FBgn0002789	2581.59	3688.58	2159.02	1987.42	3135.08	2073.22	0.596506	0.0263705	0.288122	Mp20	2R	13246670	13248880	+	948	protein_coding	- && P14318.2 RecName: Full=Muscle-specific protein 20 && PF00307:Calponin homology (CH) domain|PF00402:Calponin family repeat	CH
FBgn0030990	2723.96	2944.65	1514.42	2207.63	2834.31	1861.03	0.606888	0.0264834	0.28901	CG7556	X	19176109	19179830	-	2893	protein_coding	- && P34454.3 RecName: Full=Uncharacterized protein F54F2.9; Flags: Precursor && PF00249:Myb-like DNA-binding domain|PF00226:DnaJ domain	DnaJ
FBgn0264493	285.796	272.504	968.718	267.395	279.15	618.057	-1.1467	0.0265471	0.28936	rdx	3R	13967061	14032057	-	6511	protein_coding	- && Q9VFP2.2 RecName: Full=Protein roadkill; AltName: Full=Hh-induced MATH and BTB domain-containing protein && PF00651:BTB/POZ domain|PF00917:MATH domain	BTB
FBgn0011761	72.2343	39.0934	2402.57	36.0845	55.6638	1219.33	-4.45299	0.0266512	0.290149	dhd	X	5312171	5313125	+	955	protein_coding	- && P47938.1 RecName: Full=Thioredoxin-1; Short=DmTrx-1; AltName: Full=Protein deadhead && PF00085:Thioredoxin	-
FBgn0035107	1612.18	2100.7	1290.1	1220.4	1856.44	1255.25	0.564393	0.0268903	0.291805	mri	3L	200174	202152	+	1739	protein_coding	- && Q80X66.1 RecName: Full=BTB/POZ domain-containing protein 10; AltName: Full=Glucose metabolism-related protein 1 && PF16017:BTB/POZ domain	-
FBgn0039182	579.968	449.574	622.617	1183.39	514.771	903.002	-0.81048	0.0268991	0.291805	CG5728	3R	24328455	24333316	-	4622	protein_coding	- && Q6NS46.2 RecName: Full=Protein RRP5 homolog; AltName: Full=Apoptosis-linked gene 4 protein; AltName: Full=Programmed cell death protein 11 && PF05843:Suppressor of forked protein (Suf)	-
FBgn0039719	33.4999	62.0896	17.3966	12.9534	47.7948	15.175	1.65305	0.0269201	0.291805	CG15515	3R	29905464	29906448	+	472	protein_coding	- && - && PF00379:Insect cuticle protein	Chitin_bind_4
FBgn0259111	1521.11	1853.49	3135.06	2111.41	1687.3	2623.23	-0.636753	0.0269309	0.291805	Ndae1	2L	7223328	7249343	-	7054	protein_coding	- && Q6U841.1 RecName: Full=Sodium-driven chloride bicarbonate exchanger; AltName: Full=Solute carrier family 4 member 10 && PF00955:HCO3- transporter family|PF07565:Band 3 cytoplasmic domain	Band_3_cyto
FBgn0002284	3245.31	3533.36	2078.44	2602.71	3389.33	2340.58	0.534115	0.0269764	0.291952	Prosbeta6	3L	16609400	16610418	-	944	protein_coding	- && P40304.2 RecName: Full=Proteasome subunit beta type-1; AltName: Full=Proteasome 26 kDa subunit; Flags: Precursor && PF00227:Proteasome subunit	Proteasome
FBgn0038252	6.28124	2.29961	255.456	2.77573	4.29043	129.116	-4.90819	0.0270489	0.292391	BigH1	3R	14663450	14664822	+	1279	protein_coding	- && - && PF00538:linker histone H1 and H5 family	-
FBgn0010549	14.6562	11.4981	19.2279	84.1972	13.0771	51.7125	-1.98159	0.0270878	0.292465	l(2)03659	2R	9390165	9395281	+	4499	protein_coding	- && P91660.4 RecName: Full=Probable multidrug resistance-associated protein lethal(2)03659; AltName: Full=Wunen region A protein && PF00005:ABC transporter|PF00664:ABC transporter transmembrane region	ABC_membrane
FBgn0031646	33.4999	44.8425	176.713	47.1874	39.1712	111.95	-1.51632	0.0272867	0.294265	snsl	2L	4903865	4906762	-	1294	protein_coding	- && - && -	-
FBgn0037713	190.531	350.691	149.245	139.712	270.611	144.478	0.904326	0.0274103	0.29525	CG16790	3R	9569074	9570214	-	1028	protein_coding	- && Q9VHB3.1 RecName: Full=U6 snRNA phosphodiesterase && PF09749:Uncharacterised conserved protein	-
FBgn0030828	7331.25	10506.9	4735.55	6666.38	8919.09	5700.97	0.645659	0.027518	0.296062	CG5162	X	17215304	17217365	+	1533	protein_coding	- && P06607.1 RecName: Full=Vitellogenin-3; AltName: Full=Vitellogenin III; AltName: Full=Yolk protein 3; Flags: Precursor && PF00151:Lipase	Lipase
FBgn0013675	47887.1	67926	35243.8	42001.4	57906.6	38622.6	0.584274	0.0276824	0.29748	mt:CoII	mitochondrion_genome	3083	3767	+	685	protein_coding	- && P00408.1 RecName: Full=Cytochrome c oxidase subunit 2; AltName: Full=Cytochrome c oxidase polypeptide II && -	-
FBgn0037936	265.906	234.561	398.292	2225.21	250.233	1311.75	-2.39011	0.0278743	0.299191	CG6908	3R	11688381	11690051	-	1439	protein_coding	- && - && PF02958:Ecdysteroid kinase	-
FBgn0053181	7.32811	11.4981	91.5613	8.32719	9.41309	49.9442	-2.41059	0.0279177	0.299305	CG33181	X	8489348	8517029	+	5315	protein_coding	- && Q8BYR8.1 RecName: Full=Solute carrier family 41 member 2 && PF01769:Divalent cation transporter	-
FBgn0262838	372.687	256.407	166.642	199.853	314.547	183.247	0.780267	0.0281702	0.301596	CG43202	2R	18381393	18381844	-	390	protein_coding	- && - && -	-
FBgn0036165	251.25	85.0857	491.684	262.769	168.168	377.227	-1.16399	0.0282178	0.301596	chrb	3L	11487550	11499055	+	5960	protein_coding	- && Q9VTI8.2 RecName: Full=Protein charybde; AltName: Full=Protein charybdis; AltName: Full=Protein regulated in development and DNA damage response 1; Short=REDD-1 && PF07809:RTP801 C-terminal region	-
FBgn0026257	35.5937	36.7938	92.4769	71.2438	36.1938	81.8603	-1.17774	0.0282303	0.301596	cav	3R	24221103	24223528	+	2049	protein_coding	- && Q95RV2.1 RecName: Full=Telomere-binding protein cav; AltName: Full=Anonymous fast evolving 1G5; AltName: Full=HP1/ORC-associated protein; Short=HOAP p55; AltName: Full=Protein caravaggio && -	-
FBgn0265200	0	0	4.57806	12.0282	0	8.30312	-5.36237	0.0282621	1	lncRNA:CR44260	3R	7720049	7721124	+	713	ncRNA	- && - && -	-
FBgn0029525	495.171	416.23	461.469	1382.31	455.701	921.891	-1.01634	0.0283251	0.302256	CG18273	X	482777	487581	-	4342	protein_coding	- && - && PF10441:Urb2/Npa2 family	-
FBgn0260450	295.218	277.103	176.713	176.722	286.161	176.717	0.695554	0.0283794	0.302482	CalpC	X	16325763	16328523	+	2687	protein_coding	- && Q9VXH6.4 RecName: Full=Calpain-C; AltName: Full=Calcium-activated neutral proteinase homolog C; Short=CANP C && PF01067:Calpain large subunit, domain III|PF00648:Calpain family cysteine protease	Peptidase_C2
FBgn0037678	48.1562	64.3892	24.7215	16.6544	56.2727	20.688	1.44238	0.028702	0.305565	CG16749	3R	9330885	9331885	-	873	protein_coding	- && P51588.1 RecName: Full=Trypsin; Flags: Precursor && PF00089:Trypsin	Trypsin
FBgn0036254	73.2811	63.2394	157.485	111.954	68.2602	134.72	-0.980152	0.0288614	0.306904	CG5645	3L	12133771	12136706	-	2745	protein_coding	- && Q9VTU0.1 RecName: Full=Protein KRI1 homolog && PF05178:KRI1-like family|PF12936:KRI1-like family C-terminal	-
FBgn0028554	172.734	140.276	364.414	210.03	156.505	287.222	-0.875421	0.0289466	0.307453	x16	2L	6914301	6920210	-	1787	protein_coding	- && Q3T106.1 RecName: Full=Serine/arginine-rich splicing factor 7; AltName: Full=Splicing factor, arginine/serine-rich 7 && PF00076:RNA recognition motif. (a.k.a. RRM, RBD, or RNP domain)	RRM_1
FBgn0053509	160.172	134.527	293.912	216.507	147.349	255.209	-0.791835	0.0291092	0.308777	CG33509	2L	21084605	21086506	-	1405	protein_coding	- && - && PF02958:Ecdysteroid kinase	-
FBgn0260985	84.7967	66.6888	105.295	217.432	75.7428	161.364	-1.09007	0.0291388	0.308777	RfC4	3L	4134860	4136038	-	1127	protein_coding	- && P53034.1 RecName: Full=Replication factor C subunit 2; AltName: Full=Activator 1 40 kDa subunit; Short=A1 40 kDa subunit; AltName: Full=Activator 1 subunit 2; AltName: Full=Replication factor C 40 kDa subunit; Short=RF-C 40 kDa subunit; Short=RFC40; AltName: Full=Replication factor C subunit 4; Short=DmRfc4 && PF00004:ATPase family associated with various cellular activities (AAA)|PF08542:Re…	AAA
FBgn0037384	70.1405	81.6363	166.642	123.983	75.8884	145.312	-0.938085	0.0291882	0.308942	dgrn	3R	5824615	5826576	+	1635	protein_coding	- && Q6J6I9.1 RecName: Full=Breast cancer type 1 susceptibility protein homolog; AltName: Full=RING-type E3 ubiquitin transferase BRCA1 && PF13639:Ring finger domain	-
FBgn0028411	81.6561	85.0857	124.523	198.927	83.3709	161.725	-0.95601	0.0292874	0.309424	Nxt1	2R	23811321	23811974	-	540	protein_coding	- && Q9V3H8.1 RecName: Full=NTF2-related export protein; AltName: Full=p15 && PF02136:Nuclear transport factor 2 (NTF2) domain	-
FBgn0031516	907.639	684.135	470.625	559.772	795.887	515.199	0.627794	0.0293014	0.309424	CG9663	2L	3294926	3303130	-	3062	protein_coding	- && P45844.3 RecName: Full=ATP-binding cassette sub-family G member 1; AltName: Full=ATP-binding cassette transporter 8; AltName: Full=White protein homolog && PF01061:ABC-2 type transporter|PF00005:ABC transporter	ABC2_membrane
FBgn0028408	23.0312	12.6479	174.882	7.40195	17.8395	91.142	-2.35111	0.0294785	0.310935	Drep2	2R	9291856	9302821	+	6902	protein_coding	- && F1MN90.1 RecName: Full=Cell death activator CIDE-3; AltName: Full=Cell death-inducing DFFA-like effector protein C; AltName: Full=Fat-specific protein FSP27 homolog && PF02017:CIDE-N domain	-
FBgn0030099	227.172	242.609	130.017	149.889	234.89	139.953	0.746917	0.0296916	0.312822	CG12056	X	9192669	9193620	+	952	protein_coding	- && Q9W376.1 RecName: Full=Neuferricin homolog; AltName: Full=Cytochrome b5 domain-containing protein 2 homolog; Flags: Precursor && PF00173:Cytochrome b5-like Heme/Steroid binding domain	-
FBgn0030396	11.5156	6.89884	55.8524	19.4301	9.20722	37.6413	-2.0274	0.0300294	0.315627	CG2556	X	12497188	12516565	+	2304	protein_coding	- && - && -	-
FBgn0035423	1524.25	1525.79	2029.91	2263.15	1525.02	2146.53	-0.493172	0.0300616	0.315627	eIF1	3L	3223341	3224650	+	681	protein_coding	- && Q9VZS3.1 RecName: Full=Protein translation factor SUI1 homolog && PF01253:Translation initiation factor SUI1	SUI1
FBgn0024920	7.32811	6.89884	54.9368	12.9534	7.11348	33.9451	-2.25431	0.0300789	0.315627	Ts	2L	2968293	2969638	-	1346	protein_coding	- && O76511.2 RecName: Full=Thymidylate synthase; Short=TS; Short=TSase && PF00303:Thymidylate synthase	-
FBgn0000256	1196.58	1256.74	699.528	939.122	1226.66	819.325	0.582216	0.0300958	0.315627	capu	2L	3872646	3902860	-	6240	protein_coding	- && Q24120.2 RecName: Full=Protein cappuccino && PF02181:Formin Homology 2 Domain	FH2
FBgn0003748	5091.99	3856.45	3060.89	3115.3	4474.22	3088.09	0.534998	0.0302007	0.316364	Treh	2R	21074018	21088945	+	4369	protein_coding	- && Q9W2M2.1 RecName: Full=Trehalase; AltName: Full=Alpha,alpha-trehalase; AltName: Full=Alpha,alpha-trehalose glucohydrolase; Flags: Precursor && PF01204:Trehalase	-
FBgn0038201	33.4999	57.4903	19.2279	6.47671	45.4951	12.8523	1.82158	0.0302995	0.317035	PK1-R	3R	14099832	14103122	-	2512	protein_coding	- && Q8ITC7.3 RecName: Full=Neuropeptides capa receptor; AltName: Full=Cap2b receptor; AltName: Full=Capability receptor && PF00001:7 transmembrane receptor (rhodopsin family)	7tm_1
FBgn0261549	184.25	136.827	337.861	229.46	160.538	283.661	-0.820354	0.0303471	0.31709	rdgA	X	8907068	9029476	+	12982	protein_coding	- && Q09103.2 RecName: Full=Eye-specific diacylglycerol kinase; Short=DAG kinase 2; Short=DGK 2; Short=Diglyceride kinase 2; AltName: Full=Retinal degeneration A protein && PF12796:Ankyrin repeats (3 copies)|PF00781:Diacylglycerol kinase catalytic domain|PF00609:Diacylglycerol kinase accessory domain|PF00130:Phorbol esters/diacylglycerol binding domain (C1 domain)	C1_1
FBgn0013732	24.0781	5.74903	89.7301	27.7573	14.9136	58.7437	-1.97086	0.0303741	0.31709	sced	2R	6657326	6660624	+	3299	protein_coding	- && - && -	-
FBgn0044452	9799.78	6027.29	4359.23	5641.21	7913.53	5000.22	0.662383	0.0304694	0.317723	Atg2	3L	2774338	2780677	+	6266	protein_coding	- && Q6P4T0.2 RecName: Full=Autophagy-related protein 2 homolog A && PF09333:Autophagy-related protein C terminal domain|PF12624:N-terminal region of Chorein or VPS13	-
FBgn0031389	864.717	1032.53	1226.01	1632.13	948.622	1429.07	-0.591342	0.0305592	0.318296	CG4259	2L	2127309	2129237	-	1867	protein_coding	- && - && PF00089:Trypsin	Trypsin
FBgn0261363	14.6562	27.5954	48.5275	68.468	21.1258	58.4978	-1.47375	0.0306805	0.319196	PPO3	2R	23064769	23067183	+	2228	protein_coding	- && Q9W1V6.1 RecName: Full=Phenoloxidase 3; AltName: Full=Diphenol oxidase A3; AltName: Full=Diphenoloxidase subunit A3; AltName: Full=Prophenoloxidase 59; AltName: Full=Tyrosinase A3; Flags: Precursor && PF03723:Hemocyanin, ig-like domain|PF00372:Hemocyanin, copper containing domain|PF03722:Hemocyanin, all-alpha domain	-
FBgn0261436	1424.79	2029.41	1063.03	1212.99	1727.1	1138.01	0.601647	0.0307853	0.319922	DhpD	3R	4227387	4229238	-	1590	protein_coding	- && Q9WTT6.1 RecName: Full=Guanine deaminase; Short=Guanase; Short=Guanine aminase; AltName: Full=Guanine aminohydrolase; Short=GAH && PF01979:Amidohydrolase family	Amidohydro_1
FBgn0267913	157.031	208.115	113.536	85.1224	182.573	99.3292	0.877326	0.0308428	0.320156	lncRNA:CR46194	2R	12169558	12171706	-	2149	ncRNA	- && - && -	-
FBgn0032050	453.296	277.103	514.574	731.868	365.2	623.221	-0.770236	0.0309368	0.320768	CG13096	2L	8509069	8511866	-	2450	protein_coding	- && Q9VLK2.1 RecName: Full=Ribosomal L1 domain-containing protein CG13096 && PF00687:Ribosomal protein L1p/L10e family	-
FBgn0030665	21.9843	11.4981	2.74684	1.85049	16.7412	2.29866	2.86598	0.0310185	0.32125	CG15646	X	15667885	15671029	-	2044	protein_coding	- && - && PF16056:Domain of unknown function (DUF4799)	-
FBgn0263504	40.8281	31.0448	84.2364	76.7952	35.9364	80.5158	-1.16197	0.0311276	0.322016	lncRNA:CR43493	X	22487854	22490872	-	2088	ncRNA	- && - && -	-
FBgn0034853	115.156	113.831	159.317	264.62	114.493	211.968	-0.888435	0.0312163	0.322568	Ice1	2R	23366866	23371459	+	4537	protein_coding	- && Q9W1R4.2 RecName: Full=Little elongation complex subunit 1; AltName: Full=Interactor of little elongator complex ELL subunit 1 && -	-
FBgn0043783	13396.8	25392.3	11558.7	12301.1	19394.6	11929.9	0.701047	0.0314193	0.324299	CG32444	3L	21636947	21639060	+	1280	protein_coding	- && Q66HG4.1 RecName: Full=Aldose 1-epimerase; AltName: Full=Galactose mutarotase && PF01263:Aldose 1-epimerase	Aldose_epim
FBgn0250823	624.983	536.96	1328.55	672.652	580.972	1000.6	-0.784217	0.0315478	0.325114	gish	3R	16272452	16304768	+	7030	protein_coding	- && Q62763.1 RecName: Full=Casein kinase I isoform gamma-3; Short=CKI-gamma 3 && PF00069:Protein kinase domain|PF12605:Casein kinase 1 gamma C terminal	Pkinase
FBgn0028467	874.139	956.639	595.148	663.4	915.389	629.274	0.540595	0.0316044	0.325114	CG11070	2L	6658517	6662033	+	3391	protein_coding	- && Q6P7A2.1 RecName: Full=Ubiquitin conjugation factor E4 A && PF04564:U-box domain|PF10408:Ubiquitin elongating factor core	U-box
FBgn0037614	136.094	149.475	368.992	178.572	142.784	273.782	-0.93955	0.0316048	0.325114	TMEM216	3R	8716243	8721320	+	2812	protein_coding	- && E7EYQ9.1 RecName: Full=Transmembrane protein 216 && PF09799:Predicted membrane protein	-
FBgn0031497	1517.97	1346.42	1916.38	2151.19	1432.19	2033.78	-0.505816	0.0316775	0.325495	SerRS	2L	3035493	3037403	-	1911	protein_coding	- && Q6P799.3 RecName: Full=Serine--tRNA ligase, cytoplasmic; AltName: Full=Seryl-tRNA synthetase; Short=SerRS; AltName: Full=Seryl-tRNA(Ser/Sec) synthetase && PF02403:Seryl-tRNA synthetase N-terminal domain|PF00587:tRNA synthetase class II core domain (G, H, P, S and T)	tRNA-synt_2b
FBgn0036909	51.2968	79.3367	133.679	124.908	65.3167	129.294	-0.987442	0.0318361	0.326752	Ccdc58	3L	19805181	19806932	+	1642	protein_coding	- && Q6PBK1.2 RecName: Full=Coiled-coil domain-containing protein 58 && PF09774:Caffeine-induced death protein 2	-
FBgn0044810	83.7499	356.44	105.295	65.6923	220.095	85.4939	1.36304	0.0318712	0.326752	TotX	3R	20904917	20905518	-	602	protein_coding	- && Q8IN41.1 RecName: Full=Protein Turandot X; Flags: Precursor && PF07240:Stress-inducible humoral factor Turandot	-
FBgn0040290	11.5156	25.2957	82.4052	34.234	18.4057	58.3196	-1.66886	0.0319844	0.327315	RecQ4	3L	8170640	8175978	-	5041	protein_coding	- && O94761.1 RecName: Full=ATP-dependent DNA helicase Q4; AltName: Full=DNA helicase, RecQ-like type 4; Short=RecQ4; AltName: Full=RTS; AltName: Full=RecQ protein-like 4 && PF00271:Helicase conserved C-terminal domain|PF11719:DNA replication and checkpoint protein|PF00270:DEAD/DEAH box helicase	Helicase_C
FBgn0032225	46.0624	31.0448	12.8186	11.1029	38.5536	11.9608	1.68979	0.0319978	0.327315	CG5022	2L	10344442	10347706	+	2086	protein_coding	- && Q8BHD4.1 RecName: Full=FERM domain-containing protein 3 && PF08736:FERM adjacent (FA)|PF09379:FERM N-terminal domain|PF09380:FERM C-terminal PH-like domain|PF00373:FERM central domain	Band_41
FBgn0040733	1230.08	1052.07	858.845	671.727	1141.07	765.286	0.576437	0.0320614	0.32734	CG15068	2R	18390353	18390629	-	198	protein_coding	- && Q9V8G0.1 RecName: Full=Immune-induced peptide 3; Short=DIM-3; Flags: Precursor && -	-
FBgn0036927	257.531	136.827	124.523	44.4117	197.179	84.4675	1.22354	0.0321042	0.32734	Gabat	3L	19997714	20000686	-	2330	protein_coding	- && P80147.2 RecName: Full=4-aminobutyrate aminotransferase, mitochondrial; AltName: Full=(S)-3-amino-2-methylpropionate transaminase; AltName: Full=GABA aminotransferase; Short=GABA-AT; AltName: Full=Gamma-amino-N-butyrate transaminase; Short=GABA transaminase; Short=GABA-T; AltName: Full=L-AIBAT; Flags: Precursor && PF00202:Aminotransferase class-III	Aminotran_3
FBgn0043577	15.7031	21.8463	52.1899	49.9632	18.7747	51.0765	-1.44659	0.0322025	0.32734	PGRP-SB2	3L	16726541	16727288	+	688	protein_coding	- && Q9VV96.1 RecName: Full=Peptidoglycan-recognition protein SB2; Flags: Precursor && PF01510:N-acetylmuramoyl-L-alanine amidase	-
FBgn0086558	16681.9	11702.7	6384.57	11031.7	14192.3	8708.12	0.704698	0.0322123	0.32734	Ubi-p5E	X	6276876	6279647	-	2390	protein_coding	- && P0CH28.1 RecName: Full=Polyubiquitin-C; Contains: RecName: Full=Ubiquitin-related; Contains: RecName: Full=Ubiquitin; Flags: Precursor && PF00240:Ubiquitin family	ubiquitin
FBgn0015591	10.4687	4.59923	57.6836	13.8787	7.53398	35.7811	-2.24146	0.0322308	0.32734	AstA	3R	24760530	24765071	-	1459	protein_coding	- && Q9VC44.1 RecName: Full=Allatostatin-A; AltName: Full=Allatostatins Ast; Contains: RecName: Full=Drostatin-1; AltName: Full=AST-A1; Contains: RecName: Full=Drostatin-2; AltName: Full=AST-A2(14-21); Contains: RecName: Full=Drostatin-3; AltName: Full=AST-A3; Contains: RecName: Full=Drostatin-4; AltName: Full=AST-A4; Contains: RecName: Full=Drostatin-5; AltName: Full=AST-A2(1-11); Flags: Precurs…	-
FBgn0036702	1739.9	1822.44	2083.93	3545.53	1781.17	2814.73	-0.660178	0.0323062	0.32734	CG6512	3L	17238613	17242128	-	3239	protein_coding	- && Q9Y4W6.2 RecName: Full=AFG3-like protein 2; AltName: Full=Paraplegin-like protein && PF00004:ATPase family associated with various cellular activities (AAA)|PF01434:Peptidase family M41|PF06480:FtsH Extracellular	AAA
FBgn0033235	754.796	949.74	1114.3	1468.36	852.268	1291.33	-0.599723	0.0323119	0.32734	CG8728	2R	7936866	7939114	-	1935	protein_coding	- && Q9DC61.1 RecName: Full=Mitochondrial-processing peptidase subunit alpha; AltName: Full=Alpha-MPP; AltName: Full=P-55; Flags: Precursor && PF05193:Peptidase M16 inactive domain|PF00675:Insulinase (Peptidase family M16)	-
FBgn0011955	19.8906	28.7452	0	6.47671	24.3179	3.23835	2.91009	0.0323372	0.32734	tRNA:Arg-ACG-1-5	2R	6178584	6178656	-	73	tRNA	- && - && -	-
FBgn0036643	738.046	581.802	368.992	478.351	659.924	423.671	0.639714	0.0323966	0.32734	Syx8	3L	16586108	16587057	-	897	protein_coding	- && Q9UNK0.2 RecName: Full=Syntaxin-8 && PF05739:SNARE domain	SNARE
FBgn0032161	417.702	387.485	581.414	612.511	402.594	596.963	-0.568107	0.0323995	0.32734	CG4594	2L	9920160	9921459	+	1103	protein_coding	- && P23965.1 RecName: Full=Enoyl-CoA delta isomerase 1, mitochondrial; AltName: Full=3,2-trans-enoyl-CoA isomerase; AltName: Full=Delta(3),Delta(2)-enoyl-CoA isomerase; Short=D3,D2-enoyl-CoA isomerase; AltName: Full=Dodecenoyl-CoA isomerase; Flags: Precursor && PF00378:Enoyl-CoA hydratase/isomerase	ECH
FBgn0259685	483.655	293.201	645.507	624.539	388.428	635.023	-0.708288	0.0324053	0.32734	crb	3R	24295078	24314541	+	8144	protein_coding	- && P10040.3 RecName: Full=Protein crumbs; AltName: Full=95F; Flags: Precursor && PF00054:Laminin G domain|PF02210:Laminin G domain|PF07645:Calcium-binding EGF domain|PF00008:EGF-like domain	Laminin_G_2
FBgn0033439	125.625	174.771	76.9115	83.2719	150.198	80.0917	0.906214	0.0324297	0.32734	CG1773	2R	9706267	9707580	+	1123	protein_coding	- && A0A126GUP6.1 RecName: Full=Melanization protease 1; Flags: Precursor && PF00089:Trypsin	Trypsin
FBgn0031973	3201.34	3504.61	2155.35	2581.43	3352.97	2368.39	0.501506	0.0325242	0.327931	Spn28Dc	2L	8004548	8007210	-	1792	protein_coding	- && Q5JJ64.1 RecName: Full=Uncharacterized serpin-like protein TK1782 && PF00079:Serpin (serine protease inhibitor)	Serpin
FBgn0026563	1446.78	2282.37	1069.44	1304.59	1864.57	1187.01	0.651319	0.0325618	0.327949	CG1979	3R	7054586	7058671	+	3425	protein_coding	- && - && -	-
FBgn0030855	366.406	293.201	327.789	1024.24	329.803	676.017	-1.03519	0.0328219	0.329547	CG5800	X	17636281	17639003	+	2647	protein_coding	- && Q80Y44.2 RecName: Full=Probable ATP-dependent RNA helicase DDX10; AltName: Full=DEAD box protein 10 && PF13959:Domain of unknown function (DUF4217)|PF00271:Helicase conserved C-terminal domain|PF00270:DEAD/DEAH box helicase	DEAD
FBgn0036891	1442.59	2498.53	1291.01	1170.43	1970.56	1230.72	0.678885	0.0328273	0.329547	CG9372	3L	19606208	19608368	+	1693	protein_coding	- && Q05319.2 RecName: Full=Serine proteinase stubble; AltName: Full=Protein stubble-stubbloid; Contains: RecName: Full=Serine proteinase stubble non-catalytic chain; Contains: RecName: Full=Serine proteinase stubble catalytic chain && PF00089:Trypsin	Trypsin
FBgn0025583	4598.91	3199.91	6870.76	5081.44	3899.41	5976.1	-0.615867	0.0328286	0.329547	IM2	2R	18386602	18387030	+	367	protein_coding	- && O77150.2 RecName: Full=Immune-induced peptide 2; Short=DIM-2; Flags: Precursor && -	-
FBgn0053301	26.1718	27.5954	37.5401	115.655	26.8836	76.5978	-1.51066	0.0329313	0.330215	CG33301	2L	10049580	10051201	+	1563	protein_coding	- && - && PF02958:Ecdysteroid kinase	-
FBgn0024364	371.64	327.695	495.347	564.399	349.667	529.873	-0.599294	0.0330088	0.330303	CG11417	X	1354014	1356473	+	2460	protein_coding	- && Q9H501.1 RecName: Full=ESF1 homolog; AltName: Full=ABT1-associated protein && PF08159:NUC153 domain	-
FBgn0038221	49.203	40.2432	16.481	14.8039	44.7231	15.6425	1.5162	0.0330135	0.330303	IFT54	3R	14302428	14304458	+	1843	protein_coding	- && Q149C2.2 RecName: Full=TRAF3-interacting protein 1; AltName: Full=Intraflagellar transport protein 54 homolog; AltName: Full=Microtubule-interacting protein associated with TRAF3; Short=MIP-T3 && PF10243:Microtubule-binding protein MIP-T3	-
FBgn0037788	738.046	1507.4	727.912	558.847	1122.72	643.38	0.802902	0.0330484	0.330303	CAH7	3R	10112237	10120081	+	2376	protein_coding	- && P18915.2 RecName: Full=Carbonic anhydrase 6; AltName: Full=Carbonate dehydratase VI; AltName: Full=Carbonic anhydrase VI; Short=CA-VI; AltName: Full=Salivary carbonic anhydrase; AltName: Full=Secreted carbonic anhydrase; Flags: Precursor && PF00194:Eukaryotic-type carbonic anhydrase	-
FBgn0032408	235.547	215.014	285.671	494.08	225.28	389.876	-0.790998	0.0330904	0.330362	CG6712	2L	12095176	12096511	-	1336	protein_coding	- && Q9VKB4.1 RecName: Full=Probable ribosome production factor 1; AltName: Full=Ribosome biogenesis protein RPF1 && PF04427:Brix domain	-
FBgn0000996	61.7655	59.7899	227.988	69.3933	60.7777	148.69	-1.29073	0.0332699	0.33127	dup	2R	15376619	15380988	-	3138	protein_coding	- && Q9I9A7.2 RecName: Full=DNA replication factor Cdt1; Short=XCDT1 && PF08839:DNA replication factor CDT1 like|PF16679:DNA replication factor Cdt1 C-terminal domain	-
FBgn0034057	1124.34	1209.6	667.482	897.486	1166.97	782.484	0.576604	0.0332787	0.33127	CG8314	2R	15989683	15991286	-	1280	protein_coding	- && Q9NYG2.2 RecName: Full=Palmitoyltransferase ZDHHC3; AltName: Full=Protein DHHC1; AltName: Full=Zinc finger DHHC domain-containing protein 3; Short=DHHC-3 && PF01529:DHHC palmitoyltransferase	-
FBgn0053460	59.6718	34.4942	15.5654	16.6544	47.083	16.1099	1.54908	0.03329	0.33127	CG33460	2R	15694092	15695232	+	946	protein_coding	- && Q8K1T0.2 RecName: Full=Transmembrane protease serine 3 && PF00089:Trypsin	Trypsin
FBgn0033353	116.203	101.183	63.1773	43.4865	108.693	53.3319	1.02741	0.0336047	0.334038	CG13749	2R	8933423	8934445	+	897	protein_coding	- && Q8ML70.3 RecName: Full=Immune-induced peptides; Contains: RecName: Full=Immune-induced peptide 10; Short=DIM-10; Contains: RecName: Full=Immune-induced peptide 12; Short=DIM-12; Contains: RecName: Full=Immune-induced peptide 13; Short=DIM-13; Contains: RecName: Full=Immune-induced peptide 24; Short=DIM-24; Flags: Precursor && -	-
FBgn0001234	2285.32	3218.31	1068.52	2141.94	2751.82	1605.23	0.777555	0.0336509	0.334134	lncRNA:Hsromega	3R	21296127	21317836	+	21710	ncRNA	- && - && -	-
FBgn0264291	23.0312	13.7977	44.865	58.2903	18.4144	51.5777	-1.48188	0.0337903	0.335155	Det	3R	17149667	17150455	+	651	protein_coding	- && Q9JHY7.1 RecName: Full=Baculoviral IAP repeat-containing protein 5; AltName: Full=Apoptosis inhibitor survivin && PF00653:Inhibitor of Apoptosis domain	BIR
FBgn0010660	339.187	340.343	448.65	610.661	339.765	529.656	-0.64048	0.0338876	0.335755	Nup214	2R	22918937	22924742	-	5334	protein_coding	- && Q9W1X4.2 RecName: Full=Nuclear pore complex protein Nup214; AltName: Full=214 kDa nucleoporin; Short=DNup214; AltName: Full=Nucleoporin Nup214 && -	-
FBgn0003525	8.37499	1.14981	249.047	4.62622	4.7624	126.836	-4.73045	0.0341797	0.338283	stg	3R	29251826	29255800	-	3064	protein_coding	- && P20483.2 RecName: Full=M-phase inducer phosphatase; AltName: Full=Cdc25-like protein; AltName: Full=Protein string && PF00581:Rhodanese-like domain	Rhodanese
FBgn0032350	18878.3	12799.6	11241	10088.9	15839	10664.9	0.570629	0.0342183	0.338299	CG6287	2L	11151506	11155721	-	1284	protein_coding	- && Q61753.3 RecName: Full=D-3-phosphoglycerate dehydrogenase; Short=3-PGDH; AltName: Full=A10 && PF02826:D-isomer specific 2-hydroxyacid dehydrogenase, NAD binding domain|PF00389:D-isomer specific 2-hydroxyacid dehydrogenase, catalytic domain	2-Hacid_dh_C
FBgn0014877	420.843	466.821	586.908	761.476	443.832	674.192	-0.603329	0.0342791	0.338303	Roe1	2R	13554077	13555606	+	1065	protein_coding	- && P48604.2 RecName: Full=GrpE protein homolog, mitochondrial; AltName: Full=dRoe1; Flags: Precursor && PF01025:GrpE	-
FBgn0028429	1033.26	1060.12	1465.9	1464.66	1046.69	1465.28	-0.485373	0.0342971	0.338303	I-2	3L	9834367	9836805	-	1858	protein_coding	- && P50411.2 RecName: Full=Protein phosphatase inhibitor 2; Short=IPP-2 && PF04979:Protein phosphatase inhibitor 2 (IPP-2)	-
FBgn0284251	331.859	320.796	427.591	600.483	326.327	514.037	-0.65542	0.0343449	0.338303	l(2)05287	2L	21094966	21102429	-	3471	protein_coding	- && Q8IWA0.1 RecName: Full=WD repeat-containing protein 75; AltName: Full=U3 small nucleolar RNA-associated protein 17 homolog && -	-
FBgn0034232	74.328	54.0409	114.452	136.011	64.1845	125.231	-0.962499	0.0343667	0.338303	CG4866	2R	17518223	17519027	+	692	protein_coding	- && Q921Y2.1 RecName: Full=U3 small nucleolar ribonucleoprotein protein IMP3; Short=U3 snoRNP protein IMP3 && PF01479:S4 domain|PF00163:Ribosomal protein S4/S9 N-terminal domain	S4
FBgn0002183	697.218	505.915	694.035	1418.4	601.566	1056.22	-0.811803	0.0344341	0.338602	dre4	3L	1871574	1876312	-	3690	protein_coding	- && Q8IRG6.2 RecName: Full=FACT complex subunit spt16; AltName: Full=Facilitates chromatin transcription complex subunit SPT16; AltName: Full=dSPT16 && PF00557:Metallopeptidase family M24|PF08644:FACT complex subunit (SPT16/CDC68)|PF08512:Histone chaperone Rttp106-like|PF14826:FACT complex subunit SPT16 N-terminal lobe domain	Peptidase_M24
FBgn0033092	83.7499	67.8386	104.38	208.18	75.7942	156.28	-1.04299	0.0345116	0.338731	CG9422	2R	6675822	6693162	+	1973	protein_coding	- && - && PF01918:Alba	-
FBgn0039755	12213.9	16081.2	8058.31	10943.8	14147.5	9501.05	0.574375	0.0345213	0.338731	CG15531	3R	30194790	30196228	-	1158	protein_coding	- && Q8ISS3.1 RecName: Full=Acyl-CoA Delta(11) desaturase; AltName: Full=Acyl-CoA Delta-11 desaturase; Short=Delta(11)-desaturase; AltName: Full=Acyl-CoA Z/E11 desaturase && PF00487:Fatty acid desaturase	-
FBgn0037632	861.577	814.063	1183.89	1184.31	837.82	1184.1	-0.498986	0.0345906	0.339047	CCT7	3R	8801564	8806234	+	1964	protein_coding	- && Q5ZJK8.1 RecName: Full=T-complex protein 1 subunit eta; Short=TCP-1-eta; AltName: Full=CCT-eta && PF00118:TCP-1/cpn60 chaperonin family	-
FBgn0035336	102.594	89.6849	160.232	178.572	96.1392	169.402	-0.81653	0.034679	0.339549	CG9004	3L	2373728	2376488	+	2708	protein_coding	- && Q9W020.1 RecName: Full=Nucleolar MIF4G domain-containing protein 1 homolog && PF02854:MIF4G domain|PF02847:MA3 domain	-
FBgn0050109	76.4218	75.8872	134.595	143.413	76.1545	139.004	-0.868064	0.0348219	0.340584	CG30109	2R	17670082	17670748	+	609	protein_coding	- && Q96VG1.1 RecName: Full=Uncharacterized protein C119.18 && -	-
FBgn0011769	87.9374	96.5838	141.004	194.301	92.2606	167.653	-0.862058	0.0348677	0.340668	Fdx1	3L	9370195	9371238	-	741	protein_coding	- && P37193.3 RecName: Full=Adrenodoxin-like protein, mitochondrial; Flags: Precursor && PF00111:2Fe-2S iron-sulfur cluster binding domain	Fer2
FBgn0265086	11.5156	9.19845	27.4684	43.4865	10.357	35.4774	-1.77404	0.0350703	0.342282	lncRNA:CR44197	2L	13089803	13090559	+	757	ncRNA	- && - && -	-
FBgn0037792	52.3437	42.5428	91.5613	102.702	47.4433	97.1317	-1.03238	0.0351236	0.342336	TAF1B	3R	10140103	10144184	-	3504	protein_coding	- && Q9VH20.1 RecName: Full=TATA box-binding protein-associated factor RNA polymerase I subunit B; AltName: Full=TATA box-binding protein-associated factor 1B; Short=TBP-associated factor 1B && PF11781:RNA polymerase I-specific transcription initiation factor Rrn7	-
FBgn0035710	1689.65	1694.81	1149.09	1268.51	1692.23	1208.8	0.48536	0.0351507	0.342336	SP1173	3L	6689327	6703521	-	3725	protein_coding	- && - && -	-
FBgn0037815	63.8593	89.6849	117.198	184.123	76.7721	150.661	-0.97407	0.0354014	0.343638	Rrp46	3R	10413301	10414242	+	819	protein_coding	- && Q9NQT4.1 RecName: Full=Exosome complex component RRP46; AltName: Full=Chronic myelogenous leukemia tumor antigen 28; AltName: Full=Exosome component 5; AltName: Full=Ribosomal RNA-processing protein 46; AltName: Full=p12B && PF01138:3' exoribonuclease family, domain 1	RNase_PH
FBgn0032435	16.75	18.3969	39.3714	58.2903	17.5734	48.8309	-1.47504	0.0354549	0.343638	Oatp33Eb	2L	12448484	12452047	+	2743	protein_coding	- && - && PF03137:Organic Anion Transporter Polypeptide (OATP) family	-
FBgn0266569	75.3749	123.029	200.519	167.469	99.2021	183.994	-0.893266	0.035485	0.343638	CG42259	X	1046224	1047009	+	711	protein_coding	- && - && -	-
FBgn0266633	8.37499	11.4981	19.2279	56.4399	9.93653	37.8339	-1.93124	0.0354934	0.343638	asRNA:CR45140	2R	12867609	12869783	+	1244	ncRNA	- && - && -	-
FBgn0000404	30.3593	25.2957	896.385	17.5796	27.8275	456.982	-4.03742	0.0355499	0.343638	CycA	3L	11826719	11833578	-	2919	protein_coding	- && P14785.3 RecName: Full=G2/mitotic-specific cyclin-A && PF00134:Cyclin, N-terminal domain|PF02984:Cyclin, C-terminal domain	Cyclin_C
FBgn0035176	468.999	200.066	519.153	730.942	334.533	625.047	-0.900797	0.0355589	0.343638	CG13905	3L	902898	903810	+	913	protein_coding	- && - && PF06757:Insect allergen related repeat, nitrile-specifier detoxification	-
FBgn0038652	462.718	410.481	266.443	304.405	436.599	285.424	0.613492	0.0355807	0.343638	CG7720	3R	18759236	18795169	-	3261	protein_coding	- && Q7T384.1 RecName: Full=Sodium-coupled monocarboxylate transporter 2; AltName: Full=Electroneutral sodium monocarboxylate cotransporter; Short=zSMCTn; AltName: Full=Low-affinity sodium-lactate cotransporter; AltName: Full=Solute carrier family 5 member 12; Short=zSLC5A12 && PF00474:Sodium:solute symporter family	-
FBgn0036991	53.3905	48.2919	102.549	99.9263	50.8412	101.237	-0.993038	0.035585	0.343638	CtIP	3L	20436250	20438370	+	1866	protein_coding	- && - && -	-
FBgn0038082	0	0	11.903	3.70097	0	7.80197	-5.27298	0.0356339	1	Ugt37A2	3R	12739642	12741417	+	1710	protein_coding	- && Q1LZI1.1 RecName: Full=UDP-glucuronosyltransferase 3A1; Short=UDPGT 3A1; Flags: Precursor && PF00201:UDP-glucoronosyl and UDP-glucosyl transferase	UDPGT
FBgn0040732	9122.45	11986.7	7688.4	7107.72	10554.6	7398.06	0.512617	0.0356455	0.343859	CG16926	2R	19500295	19501418	-	979	protein_coding	- && - && -	-
FBgn0036992	8819.91	8042.9	6329.63	6013.16	8431.4	6171.4	0.450193	0.0358818	0.345282	Hpd	3L	20438166	20439872	-	1518	protein_coding	- && Q22633.1 RecName: Full=4-hydroxyphenylpyruvate dioxygenase; AltName: Full=4-hydroxyphenylpyruvic acid oxidase; Short=4HPPD; Short=HPD; Short=HPPDase && PF00903:Glyoxalase/Bleomycin resistance protein/Dioxygenase superfamily	Glyoxalase
FBgn0023170	5157.94	4362.37	3758.59	2715.59	4760.16	3237.09	0.556339	0.0358837	0.345282	RpL39	2R	24061853	24062431	-	288	protein_coding	- && O16130.2 RecName: Full=60S ribosomal protein L39; AltName: Full=Ribosomal protein 46 && -	-
FBgn0034392	591.483	597.899	347.017	441.341	594.691	394.179	0.593326	0.0359528	0.345282	MFS15	2R	18794618	18796678	-	1896	protein_coding	- && Q9V7S5.1 RecName: Full=Putative inorganic phosphate cotransporter && PF07690:Major Facilitator Superfamily	MFS_1
FBgn0262022	18.8437	8.04865	1.83123	0.925244	13.4462	1.37823	3.28766	0.0359608	0.345282	CG42833	3L	20200093	20200487	+	395	protein_coding	- && - && -	-
FBgn0000416	40418.7	31293.1	22870.2	27191.1	35855.9	25030.6	0.518527	0.0359819	0.345282	Sap-r	3R	30883464	30889062	-	3527	protein_coding	- && O13035.1 RecName: Full=Prosaposin; AltName: Full=Proactivator polypeptide; Contains: RecName: Full=Saposin-A; Contains: RecName: Full=Saposin-B; Contains: RecName: Full=Saposin-C; Contains: RecName: Full=Saposin-D; Flags: Precursor && PF05184:Saposin-like type B, region 1|PF03489:Saposin-like type B, region 2|PF02199:Saposin A-type domain	-
FBgn0032144	2.09375	3.44942	3.66245	41.636	2.77158	22.6492	-3.03592	0.0361022	0.346074	CG17633	2L	9769060	9770409	+	1350	protein_coding	- && Q9VL86.1 RecName: Full=Zinc carboxypeptidase A 1; Flags: Precursor && PF00246:Zinc carboxypeptidase|PF02244:Carboxypeptidase activation peptide	-
FBgn0037715	1886.47	3040.09	1677.4	1514.62	2463.28	1596.01	0.625936	0.0362166	0.346807	CG9399	3R	9571911	9574211	-	1410	protein_coding	- && O95563.1 RecName: Full=Mitochondrial pyruvate carrier 2; AltName: Full=Brain protein 44 && PF03650:Uncharacterised protein family (UPF0041)	-
FBgn0062412	257.531	327.695	135.511	205.404	292.613	170.457	0.779242	0.0362969	0.346915	Ctr1B	3R	8317612	8319205	+	953	protein_coding	- && Q8WNR0.1 RecName: Full=High affinity copper uptake protein 1; AltName: Full=Copper transporter 1; Short=CTR1; AltName: Full=Solute carrier family 31 member 1 && PF04145:Ctr copper transporter family	-
FBgn0261793	324.531	220.763	681.216	324.761	272.647	502.988	-0.882952	0.0363037	0.346915	Trf2	X	8409272	8433011	+	10332	protein_coding	- && Q6DIY4.1 RecName: Full=TATA box-binding protein-like protein 1; Short=TBP-like protein 1; AltName: Full=TATA box-binding protein-related factor 2; Short=TBP-related factor 2; AltName: Full=TBP-like factor && PF00352:Transcription factor TFIID (or TATA-binding protein, TBP)	-
FBgn0051183	1639.4	1676.42	1064.86	1273.14	1657.91	1169	0.504096	0.0363489	0.346984	CG31183	3R	15857871	15875939	-	5256	protein_coding	- && P18293.2 RecName: Full=Atrial natriuretic peptide receptor 1; AltName: Full=Atrial natriuretic peptide receptor type A; Short=ANP-A; Short=ANPR-A; Short=NPR-A; AltName: Full=Guanylate cyclase A; Short=GC-A; Flags: Precursor && PF00211:Adenylate and Guanylate cyclase catalytic domain|PF07714:Protein tyrosine kinase|PF01094:Receptor family ligand binding region	Guanylate_cyc
novel.13	51.2968	55.1907	12.8186	25.9068	53.2438	19.3627	1.45959	0.0364176	0.347278	-	2L	16141219	16146367	-	276	-	- && - && -	-
FBgn0036662	847.967	679.536	371.739	581.978	763.752	476.859	0.679817	0.0364573	0.347294	CG9706	3L	16783010	16785246	+	2062	protein_coding	- && Q99J27.1 RecName: Full=Acetyl-coenzyme A transporter 1; Short=AT-1; Short=Acetyl-CoA transporter 1; AltName: Full=Solute carrier family 33 member 1 && PF13000:Acetyl-coenzyme A transporter 1	-
FBgn0036861	12.5625	2.29961	0	0	7.43105	0	5.45879	0.0364715	1	CG14089	3L	19280120	19280800	-	681	protein_coding	- && - && PF01391:Collagen triple helix repeat (20 copies)	Collagen
FBgn0264721	54.4374	137.977	33.8777	44.4117	96.2071	39.1447	1.29557	0.0365075	0.34741	lncRNA:CR43989	3L	11163849	11164801	-	953	ncRNA	- && - && -	-
FBgn0038845	0	0	0	23.1311	0	11.5655	-5.84044	0.0365092	1	Alp5	3R	21005160	21006990	-	1674	protein_coding	- && P29523.4 RecName: Full=Membrane-bound alkaline phosphatase; Short=M-ALP; Flags: Precursor && PF00245:Alkaline phosphatase	-
FBgn0039778	0	0	0	23.1311	0	11.5655	-5.84044	0.0365092	1	Jon99Fi	3R	30488963	30489895	+	933	protein_coding	- && P17205.2 RecName: Full=Serine proteases 1/2; AltName: Full=Protein Jonah 99Cii/99Ciii; Flags: Precursor && PF00089:Trypsin	Trypsin
FBgn0027546	38.7343	19.5467	6.40929	8.32719	29.1405	7.36824	1.98603	0.0366129	0.348051	CG4766	X	5997508	6000797	-	2673	protein_coding	- && Q9Y106.1 RecName: Full=Protein mab-21-like && PF03281:Mab-21 protein	-
FBgn0260027	86.8905	67.8386	25.6372	41.636	77.3645	33.6366	1.20271	0.0366911	0.348083	CG42495	3L	18667361	18668135	+	654	protein_coding	- && - && -	-
FBgn0038849	163.312	292.051	126.355	122.132	227.682	124.243	0.872718	0.0366924	0.348083	CG7079	3R	21047462	21048829	-	1237	protein_coding	- && - && PF06585:Haemolymph juvenile hormone binding protein (JHBP)	-
FBgn0053493	1404.9	1823.59	1150.01	1075.13	1614.25	1112.57	0.536769	0.0368001	0.348743	CG33493	3L	10692530	10693167	-	638	protein_coding	- && - && -	-
FBgn0032444	1226.94	1223.39	1473.22	2230.76	1225.16	1851.99	-0.59608	0.0371452	0.35131	CCT4	2L	12690336	12692934	-	1916	protein_coding	- && Q9NB32.1 RecName: Full=T-complex protein 1 subunit delta; Short=TCP-1-delta; AltName: Full=CCT-delta && PF00118:TCP-1/cpn60 chaperonin family	-
FBgn0032213	4093.27	4401.46	2628.72	3356.78	4247.37	2992.75	0.505082	0.0371782	0.35131	CG5390	2L	10304069	10306594	-	1401	protein_coding	- && Q05319.2 RecName: Full=Serine proteinase stubble; AltName: Full=Protein stubble-stubbloid; Contains: RecName: Full=Serine proteinase stubble non-catalytic chain; Contains: RecName: Full=Serine proteinase stubble catalytic chain && PF00089:Trypsin	Trypsin
FBgn0029843	236.593	206.965	143.751	122.132	221.779	132.942	0.738638	0.0371862	0.35131	Nep1	X	6091205	6103971	+	4793	protein_coding	- && Q9JLI3.1 RecName: Full=Membrane metallo-endopeptidase-like 1; AltName: Full=NEP2(m); AltName: Full=Neprilysin II; Short=NEPII; AltName: Full=Neprilysin-2; Short=NEP2; Short=NL2; AltName: Full=Neprilysin-like 1; Short=NL-1; AltName: Full=Neprilysin-like peptidase; Short=NEPLP; AltName: Full=Soluble secreted endopeptidase; Contains: RecName: Full=Membrane metallo-endopeptidase-like 1, soluble …	-
FBgn0037958	85.8436	88.5351	124.523	204.479	87.1894	164.501	-0.915895	0.0372445	0.351497	CG6962	3R	11879702	11882534	-	2492	protein_coding	- && Q9NXE4.2 RecName: Full=Sphingomyelin phosphodiesterase 4; AltName: Full=Neutral sphingomyelinase 3; Short=nSMase-3; Short=nSMase3; AltName: Full=Neutral sphingomyelinase III && PF14724:Mitochondrial-associated sphingomyelin phosphodiesterase	-
FBgn0035642	0	0	22.8903	0	0	11.4452	-5.82578	0.0373514	1	CG18586	3L	5873311	5875466	+	2047	protein_coding	- && Q01158.1 RecName: Full=Luciferin 4-monooxygenase; Short=Luciferase && PF13193:AMP-binding enzyme C-terminal domain|PF00501:AMP-binding enzyme	AMP-binding
FBgn0030053	1264.62	964.688	730.659	785.532	1114.66	758.095	0.556417	0.037479	0.353346	CG12081	X	8588811	8590774	+	1964	protein_coding	- && Q58CV6.2 RecName: Full=Kelch domain-containing protein 3 && PF13964:Kelch motif|PF13415:Galactose oxidase, central domain|PF01344:Kelch motif	Kelch_1
FBgn0003124	19.8906	11.4981	347.933	15.7291	15.6943	181.831	-3.53342	0.0378766	0.356727	polo	3L	20309654	20313466	+	2980	protein_coding	- && P52304.2 RecName: Full=Serine/threonine-protein kinase polo && PF00069:Protein kinase domain|PF00659:POLO box duplicated region	Pkinase
FBgn0013678	120266	178997	93489.6	108622	149632	101056	0.566261	0.0380137	0.357275	mt:Cyt-b	mitochondrion_genome	10499	11635	+	1137	protein_coding	- && Q9MDZ9.1 RecName: Full=Cytochrome b; AltName: Full=Complex III subunit 3; AltName: Full=Complex III subunit III; AltName: Full=Cytochrome b-c1 complex subunit 3; AltName: Full=Ubiquinol-cytochrome-c reductase complex cytochrome b subunit && -	-
FBgn0031559	14.6562	22.9961	4.57806	1.85049	18.8262	3.21428	2.54764	0.0380168	0.357275	CG3513	2L	3692699	3693182	-	423	protein_coding	- && P83609.2 RecName: Full=Kunitz-type serine protease inhibitor A; Short=BmTI-A && -	-
FBgn0052277	5.23437	59.7899	97.9706	123.057	32.5122	110.514	-1.77047	0.0381044	0.357275	CG32277	3L	3204600	3205449	-	850	protein_coding	- && Q9UKR3.1 RecName: Full=Kallikrein-13; AltName: Full=Kallikrein-like protein 4; Short=KLK-L4; Flags: Precursor && PF00089:Trypsin	Trypsin
FBgn0085819	18.8437	10.3483	52.1899	36.0845	14.596	44.1372	-1.59179	0.038113	0.357275	28SrRNA-Psi:CR41609	X	23261772	23262666	-	895	pseudogene	- && - && -	-
FBgn0262574	311.968	290.901	211.507	162.843	301.435	187.175	0.687534	0.0381302	0.357275	CG43114	2R	11310831	11311165	+	278	protein_coding	- && - && -	-
FBgn0013673	57.578	137.977	39.3714	43.4865	97.7774	41.4289	1.23702	0.0382321	0.357863	mt:ATPase8	mitochondrion_genome	3907	4068	+	162	protein_coding	- && P50270.3 RecName: Full=ATP synthase protein 8; AltName: Full=A6L; AltName: Full=F-ATPase subunit 8 >P84344.1 RecName: Full=ATP synthase protein 8; AltName: Full=A6L; AltName: Full=F-ATPase subunit 8 >P84345.1 RecName: Full=ATP synthase protein 8; AltName: Full=A6L; AltName: Full=F-ATPase subunit 8 && -	-
FBgn0030321	1012.33	1056.67	1218.68	1992.05	1034.5	1605.37	-0.63398	0.0384855	0.359227	CG1703	X	11611927	11615128	+	3059	protein_coding	- && Q6MG08.1 RecName: Full=ATP-binding cassette sub-family F member 1; AltName: Full=ATP-binding cassette 50 && PF00005:ABC transporter	ABC_tran
FBgn0023507	22702.5	24894.5	17359.1	17820.2	23798.5	17589.6	0.436136	0.0384949	0.359227	D2hgdh	X	2141489	2144937	+	2209	protein_coding	- && O23240.3 RecName: Full=D-2-hydroxyglutarate dehydrogenase, mitochondrial; Short=AtD-2HGDH; Flags: Precursor && PF01565:FAD binding domain|PF02913:FAD linked oxidases, C-terminal domain	FAD_binding_4
FBgn0032603	936.952	1264.79	817.642	631.016	1100.87	724.329	0.603649	0.0384957	0.359227	CG17928	2L	16791568	16793444	+	1651	protein_coding	- && P19967.2 RecName: Full=Cytochrome b5-related protein; AltName: Full=Protein TU-36B && PF00487:Fatty acid desaturase|PF00173:Cytochrome b5-like Heme/Steroid binding domain	-
FBgn0020255	1248.92	1534.99	2001.53	1938.39	1391.96	1969.96	-0.501247	0.0386151	0.359396	Ran	X	11144852	11148716	-	1898	protein_coding	- && Q9VZ23.1 RecName: Full=GTP-binding nuclear protein Ran; AltName: Full=Ras-related nuclear protein && PF00071:Ras family	Ras
FBgn0263278	751.655	654.24	437.663	515.361	702.947	476.512	0.561146	0.0386379	0.359396	Fic	2L	6424336	6426371	+	1918	protein_coding	- && Q8SWV6.1 RecName: Full=Adenosine monophosphate-protein transferase FICD homolog && PF02661:Fic/DOC family	Fic
FBgn0035186	896.124	1190.05	1594.08	1449.86	1043.09	1521.97	-0.545385	0.0386406	0.359396	CG13912	3L	1189588	1190472	+	818	protein_coding	- && - && -	-
FBgn0027596	976.733	873.853	676.638	613.437	925.293	645.037	0.520657	0.038671	0.359396	Kank	2R	14901475	14928425	-	7416	protein_coding	- && Q9Z1P7.1 RecName: Full=KN motif and ankyrin repeat domain-containing protein 3; AltName: Full=Ankyrin repeat domain-containing protein 47 && PF12796:Ankyrin repeats (3 copies)|PF12075:KN motif	-
FBgn0026085	2.09375	1.14981	18.3123	10.1777	1.62178	14.245	-3.12557	0.0387183	0.359471	dgt4	X	4113701	4114929	+	1101	protein_coding	- && - && -	-
FBgn0013672	43980.2	65232	29523.9	41809.9	54606.1	35666.9	0.614469	0.0387742	0.359625	mt:ATPase6	mitochondrion_genome	4062	4736	+	675	protein_coding	- && P50269.1 RecName: Full=ATP synthase subunit a; AltName: Full=F-ATPase protein 6 (mitochondrion) [Drosophila simulans] && -	-
FBgn0036889	82.703	132.228	174.882	214.657	107.465	194.769	-0.859705	0.0388741	0.360186	CG14100	3L	19589072	19590524	-	1393	protein_coding	- && Q9VW14.1 RecName: Full=rRNA methyltransferase 3, mitochondrial; AltName: Full=RNA methyltransferase-like protein 1; AltName: Full=rRNA (guanosine-2'-O)-methyltransferase; Flags: Precursor && PF00588:SpoU rRNA Methylase family|PF08032:RNA 2'-O ribose methyltransferase substrate binding	SpoU_methylase
FBgn0066101	6937.63	8039.45	5628.27	5263.71	7488.54	5445.99	0.459457	0.0389857	0.360855	LpR1	3R	25741348	25763105	-	6638	protein_coding	- && P20063.1 RecName: Full=Low-density lipoprotein receptor; Short=LDL receptor && PF07645:Calcium-binding EGF domain|PF00057:Low-density lipoprotein receptor domain class A|PF00058:Low-density lipoprotein receptor repeat class B|PF14670:Coagulation Factor Xa inhibitory site	Ldl_recept_a
FBgn0037288	1152.61	2577.87	1052.95	1119.54	1865.24	1086.25	0.779783	0.0390292	0.360892	CG14661	3R	4953506	4955252	-	1083	protein_coding	- && - && PF06585:Haemolymph juvenile hormone binding protein (JHBP)	-
FBgn0031678	8.37499	9.19845	19.2279	47.1874	8.78672	33.2076	-1.91873	0.0391311	0.36096	Nepl3	2L	5055982	5058248	-	2267	protein_coding	- && - && PF05649:Peptidase family M13	-
FBgn0033265	70.1405	75.8872	116.283	155.441	73.0139	135.862	-0.896236	0.0391593	0.36096	coil	2R	8124981	8127242	-	2091	protein_coding	- && A1Z7A8.1 RecName: Full=Coilin && -	-
FBgn0000046	1133.76	1433.81	931.178	841.046	1283.79	886.112	0.534621	0.039186	0.36096	Act87E	3R	13425983	13428375	+	1989	protein_coding	- && P10981.1 RecName: Full=Actin-87E; Flags: Precursor && PF00022:Actin	Actin
FBgn0029896	4155.04	2565.22	2086.68	2309.41	3360.13	2198.04	0.612423	0.0391944	0.36096	CG3168	X	6720004	6739986	-	5171	protein_coding	- && Q9Z2I6.1 RecName: Full=Synaptic vesicle glycoprotein 2C; Short=Synaptic vesicle protein 2C && PF07690:Major Facilitator Superfamily|PF00083:Sugar (and other) transporter	Sugar_tr
FBgn0025726	946.373	1049.77	748.056	639.343	998.073	693.7	0.524685	0.0393473	0.361803	unc-13	4	867824	912331	-	22598	protein_coding	- && Q9UPW8.4 RecName: Full=Protein unc-13 homolog A; AltName: Full=Munc13-1 && PF06292:Domain of Unknown Function (DUF1041)|PF00130:Phorbol esters/diacylglycerol binding domain (C1 domain)|PF10540:Munc13 (mammalian uncoordinated) homology domain|PF00168:C2 domain	C2
FBgn0039593	530.765	304.699	792.005	597.707	417.732	694.856	-0.73338	0.0393651	0.361803	Sid	3R	28670704	28672021	+	1214	protein_coding	- && - && PF01223:DNA/RNA non-specific endonuclease	-
FBgn0033845	47.1093	26.4456	194.11	33.3088	36.7774	113.709	-1.62679	0.0394304	0.362039	mars	2R	13500621	13506011	+	4815	protein_coding	- && Q7K3L1.1 RecName: Full=Guanylate kinase-associated protein mars && PF03359:Guanylate-kinase-associated protein (GKAP) protein	-
FBgn0031769	77.4686	83.9359	302.152	80.4962	80.7023	191.324	-1.24567	0.0395768	0.362855	CG9135	2L	6050800	6053877	+	2412	protein_coding	- && Q8BK67.1 RecName: Full=Protein RCC2 && PF00415:Regulator of chromosome condensation (RCC1) repeat	-
FBgn0262631	43.9687	50.5915	127.27	74.0195	47.2801	100.645	-1.09089	0.0395986	0.362855	lncRNA:CR43148	2L	21624679	21626190	+	1512	ncRNA	- && - && -	-
FBgn0030468	185.297	203.516	326.874	284.975	194.406	305.924	-0.654493	0.0396737	0.363073	CG1622	X	13297082	13299910	+	1998	protein_coding	- && Q80SY5.1 RecName: Full=Pre-mRNA-splicing factor 38B && PF03371:PRP38 family	PRP38
FBgn0004436	1586.01	1286.63	1845.88	2324.21	1436.32	2085.04	-0.537522	0.0397018	0.363073	Ubc6	3R	4948755	4952682	-	2166	protein_coding	- && P25153.2 RecName: Full=Ubiquitin-conjugating enzyme E2-17 kDa; AltName: Full=E2 ubiquitin-conjugating enzyme 6; AltName: Full=Ubiquitin carrier protein; AltName: Full=Ubiquitin-protein ligase && PF00179:Ubiquitin-conjugating enzyme	UQ_con
FBgn0030507	10.4687	3.44942	49.4431	14.8039	6.95908	32.1235	-2.19821	0.0397769	0.363233	CG11164	X	13668014	13669573	+	1488	protein_coding	- && - && PF09468:Ydr279p protein family (RNase H2 complex component)	-
FBgn0032025	326.624	512.814	802.993	568.1	419.719	685.546	-0.708541	0.0397988	0.363233	CG7778	2L	8346620	8351112	+	2152	protein_coding	- && - && -	-
FBgn0032373	15.7031	14.9475	37.5401	49.0379	15.3253	43.289	-1.49757	0.040111	0.365718	Vha100-5	2L	11738948	11744524	+	2918	protein_coding	- && Q29466.1 RecName: Full=V-type proton ATPase 116 kDa subunit a isoform 1; Short=V-ATPase 116 kDa isoform a1; AltName: Full=Clathrin-coated vesicle/synaptic vesicle proton pump 116 kDa subunit; AltName: Full=Vacuolar adenosine triphosphatase subunit Ac116; AltName: Full=Vacuolar proton pump subunit 1; AltName: Full=Vacuolar proton translocating ATPase 116 kDa subunit a isoform 1 && PF01496:V-t…	-
FBgn0002524	519.249	396.683	616.207	784.607	457.966	700.407	-0.612424	0.0401672	0.365865	lace	2L	15499127	15505018	+	2991	protein_coding	- && P97363.2 RecName: Full=Serine palmitoyltransferase 2; AltName: Full=Long chain base biosynthesis protein 2; Short=LCB 2; AltName: Full=Long chain base biosynthesis protein 2a; Short=LCB2a; AltName: Full=Serine-palmitoyl-CoA transferase 2; Short=SPT 2 && PF00155:Aminotransferase class I and II	Aminotran_1_2
FBgn0266408	30.3593	21.8463	4.57806	8.32719	26.1028	6.45263	2.01796	0.0405573	0.369052	lncRNA:CR45048	3R	19908403	19910318	-	1835	ncRNA	- && Q9VDS5.1 RecName: Full=Rho GTPase-activating protein 92B && -	-
FBgn0036264	38.7343	37.9436	10.9874	14.8039	38.339	12.8956	1.57226	0.040744	0.370381	CG11529	3L	12197791	12199030	+	1240	protein_coding	- && P08897.3 RecName: Full=Collagenase; AltName: Full=Hypodermin C; Short=HC; Flags: Precursor && PF00089:Trypsin	Trypsin
FBgn0036547	181.109	304.699	140.089	136.011	242.904	138.05	0.814149	0.0407889	0.370422	CG17032	3L	15958843	15960609	+	1463	protein_coding	- && - && -	-
FBgn0001145	1621.61	1928.23	2606.75	2363.07	1774.92	2484.91	-0.485581	0.0408442	0.370556	Gs2	X	11422832	11430197	+	2231	protein_coding	- && P20478.3 RecName: Full=Glutamine synthetase 2 cytoplasmic; AltName: Full=Glutamate--ammonia ligase 2 && PF00120:Glutamine synthetase, catalytic domain|PF03951:Glutamine synthetase, beta-Grasp domain	-
FBgn0032774	12426.4	12027	8940.96	9260.76	12226.7	9100.86	0.425963	0.0409374	0.370733	CG17549	2L	19387050	19390075	-	1203	protein_coding	- && - && -	-
FBgn0087021	9.42186	11.4981	48.5275	23.1311	10.46	35.8293	-1.77822	0.0409561	0.370733	Spc25	3R	12961745	12963249	+	968	protein_coding	- && Q9V3V7.1 RecName: Full=Kinetochore protein Spc25; AltName: Full=Chromosome alignment defect 2; AltName: Full=Mitotic chaos && -	-
FBgn0004432	14202.9	23129.5	12786.5	11969	18666.2	12377.7	0.592657	0.0409853	0.370733	Cyp1	X	16317673	16320370	-	1227	protein_coding	- && P25007.2 RecName: Full=Peptidyl-prolyl cis-trans isomerase; Short=PPIase; AltName: Full=Cyclophilin; AltName: Full=Cyclosporin A-binding protein; AltName: Full=Rotamase && PF00160:Cyclophilin type peptidyl-prolyl cis-trans isomerase/CLD	Pro_isomerase
FBgn0030749	992.436	842.808	1052.04	1902.3	917.622	1477.17	-0.686719	0.0411683	0.37202	AnxB11	X	16416958	16422265	-	2976	protein_coding	- && Q9VXG4.2 RecName: Full=Annexin B11 && PF00191:Annexin	-
FBgn0261278	85.8436	141.426	394.629	117.506	113.635	256.068	-1.1732	0.0413367	0.372897	grp	2L	16680054	16699926	+	3049	protein_coding	- && O61661.2 RecName: Full=Serine/threonine-protein kinase grp; AltName: Full=Chk1 homolog; AltName: Full=Protein grapes && PF00069:Protein kinase domain	Pkinase
FBgn0036359	134	181.669	89.7301	86.9729	157.835	88.3515	0.836172	0.0413469	0.372897	CG14105	3L	13425891	13426673	-	666	protein_coding	- && Q9VU70.1 RecName: Full=Tetratricopeptide repeat protein 36 homolog; Short=TPR repeat protein 36 homolog && PF13414:TPR repeat	-
FBgn0013763	30974.9	37390.6	20030.9	27349.3	34182.7	23690.1	0.528979	0.0415102	0.373645	Idgf6	2R	16691022	16693751	+	1811	protein_coding	- && Q23997.2 RecName: Full=Chitinase-like protein CG5210; AltName: Full=Drosophila Schneider line-2 47-kDa protein; Short=DmDS47; Flags: Precursor && PF00704:Glycosyl hydrolases family 18	-
FBgn0085244	123.531	201.216	96.1394	76.7952	162.374	86.4673	0.907825	0.0415302	0.373645	CG34215	2R	6831296	6831793	-	444	protein_coding	- && - && PF15430:Single domain von Willebrand factor type C	-
FBgn0259210	24.0781	13.7977	50.3587	50.8884	18.9379	50.6236	-1.41431	0.0415843	0.373645	prom	2R	24415410	24428387	-	4379	protein_coding	- && - && PF05478:Prominin	Prominin
FBgn0036207	65.953	98.8834	139.173	164.693	82.4182	151.933	-0.884275	0.0415933	0.373645	CG10907	3L	11793514	11795418	+	1610	protein_coding	- && Q7ZW86.1 RecName: Full=Peptidyl-prolyl cis-trans isomerase CWC27 homolog; Short=PPIase CWC27 && PF00160:Cyclophilin type peptidyl-prolyl cis-trans isomerase/CLD	Pro_isomerase
FBgn0027783	40.8281	37.9436	79.6583	84.1972	39.3858	81.9277	-1.05615	0.0416704	0.37397	SMC2	2R	14848621	14852653	-	3690	protein_coding	- && O95347.2 RecName: Full=Structural maintenance of chromosomes protein 2; Short=SMC protein 2; Short=SMC-2; AltName: Full=Chromosome-associated protein E; Short=hCAP-E; AltName: Full=XCAP-E homolog && PF02463:RecF/RecN/SMC N terminal domain|PF06470:SMC proteins Flexible Hinge Domain	SMC_N
FBgn0027621	26046.2	23721.7	19461.4	17070.7	24883.9	18266	0.446055	0.04188	0.375483	Pfrx	X	19495505	19509350	+	4250	protein_coding	- && P70266.2 RecName: Full=6-phosphofructo-2-kinase/fructose-2,6-bisphosphatase 1; Short=6PF-2-K/Fru-2,6-P2ase 1; Short=PFK/FBPase 1; AltName: Full=6PF-2-K/Fru-2,6-P2ase liver isozyme; Includes: RecName: Full=6-phosphofructo-2-kinase; Includes: RecName: Full=Fructose-2,6-bisphosphatase && PF01591:6-phosphofructo-2-kinase|PF00300:Histidine phosphatase superfamily (branch 1)	-
FBgn0085485	26.1718	26.4456	9.15613	3.70097	26.3087	6.42855	2.03207	0.0419972	0.376165	CG34456	3L	9362108	9362734	+	627	protein_coding	- && - && -	-
FBgn0267727	21.9843	8.04865	744.393	4.62622	15.0165	374.51	-4.63947	0.0420717	0.376463	Pen	2L	10056900	10060095	+	2577	protein_coding	- && P52295.2 RecName: Full=Importin subunit alpha; AltName: Full=Karyopherin subunit alpha; AltName: Full=Pendulin && PF16186:Atypical Arm repeat|PF00514:Armadillo/beta-catenin-like repeat|PF01749:Importin beta binding domain	Arm
FBgn0041087	12.5625	8.04865	86.9832	8.32719	10.3056	47.6552	-2.20687	0.0424549	0.378927	wun2	2R	9414342	9417846	+	2211	protein_coding	- && Q9V576.2 RecName: Full=Putative phosphatidate phosphatase; AltName: Full=Germ cell guidance factor; AltName: Full=Phosphatidic acid phosphatase type 2; AltName: Full=Protein wunen && PF01569:PAP2 superfamily	-
FBgn0004359	135.047	190.868	99.8018	80.4962	162.957	90.149	0.853076	0.0424725	0.378927	T48	3R	26881734	26910997	+	2449	protein_coding	- && - && -	-
FBgn0038956	4.18749	3.44942	40.287	6.47671	3.81846	23.3818	-2.61261	0.0424848	0.378927	CAH8	3R	22386489	22389714	-	1471	protein_coding	- && P07630.3 RecName: Full=Carbonic anhydrase 2; AltName: Full=Carbonate dehydratase II; AltName: Full=Carbonic anhydrase II; Short=CA-II && PF00194:Eukaryotic-type carbonic anhydrase	-
FBgn0011286	562.171	708.281	458.722	389.528	635.226	424.125	0.582405	0.0425133	0.378927	RyR	2R	8860364	8888097	+	16405	protein_coding	- && Q24498.3 RecName: Full=Ryanodine receptor; AltName: Full=Ryanodine receptor 44F && PF02815:MIR domain|PF08709:Inositol 1,4,5-trisphosphate/ryanodine receptor|PF08454:RyR and IP3R Homology associated|PF01365:RIH domain|PF02026:RyR domain|PF06459:Ryanodine Receptor TM 4-6|PF00622:SPRY domain|PF00520:Ion transport protein	SPRY
FBgn0264958	24.0781	9.19845	3.66245	0.925244	16.6383	2.29385	2.85957	0.0425708	0.378927	lncRNA:CR44127	2R	5967397	5967746	-	350	ncRNA	- && - && -	-
FBgn0000351	9.42186	2.29961	59.5148	7.40195	5.86074	33.4584	-2.50408	0.0426295	0.378927	cort	2L	6674682	6676635	-	1655	protein_coding	- && Q960N3.2 RecName: Full=Protein cortex && -	-
FBgn0038953	265.906	257.557	370.823	1819.03	261.731	1094.93	-2.06466	0.0426414	0.378927	CG18596	3R	22375923	22379955	+	3665	protein_coding	- && Q13395.1 RecName: Full=Probable methyltransferase TARBP1; AltName: Full=TAR RNA-binding protein 1; AltName: Full=TAR RNA-binding protein of 185 kDa; Short=TRP-185 && PF00588:SpoU rRNA Methylase family	SpoU_methylase
FBgn0015766	7081.05	7510.54	5240.97	5574.59	7295.79	5407.78	0.432016	0.0426785	0.378927	Msr-110	3L	5566919	5577348	-	2902	protein_coding	- && - && PF12540:Protein of unknown function (DUF3736)	-
FBgn0038478	37.6874	56.3405	137.342	70.3185	47.014	103.83	-1.14517	0.0427852	0.379248	cal1	3R	17088280	17091938	+	3602	protein_coding	- && - && PF10384:Centromere protein Scm3	-
FBgn0038401	72.2343	88.5351	149.245	137.861	80.3847	143.553	-0.83771	0.0427976	0.379248	CG5916	3R	16147029	16149636	+	2396	protein_coding	- && Q6PBU5.1 RecName: Full=Growth hormone-regulated TBC protein 1-A && PF00566:Rab-GTPase-TBC domain	TBC
FBgn0263352	190.531	188.568	675.722	161.918	189.55	418.82	-1.14381	0.0430263	0.380905	Unr	3L	8432322	8442381	-	8968	protein_coding	- && P18395.1 RecName: Full=Cold shock domain-containing protein E1; AltName: Full=Protein UNR && PF00313:'Cold-shock' DNA-binding domain	CSD
FBgn0019938	656.39	566.855	769.115	1063.1	611.622	916.11	-0.582629	0.0433347	0.383011	RpI1	2R	14595611	14601216	-	5078	protein_coding	- && P91875.2 RecName: Full=DNA-directed RNA polymerase I subunit RPA1; Short=RNA polymerase I subunit A1; AltName: Full=DNA-directed RNA polymerase I largest subunit; AltName: Full=DNA-directed RNA polymerase I subunit A && PF04983:RNA polymerase Rpb1, domain 3|PF05000:RNA polymerase Rpb1, domain 4|PF00623:RNA polymerase Rpb1, domain 2|PF04998:RNA polymerase Rpb1, domain 5|PF04997:RNA polymerase…	-
FBgn0002906	50.2499	22.9961	86.0676	82.3467	36.623	84.2071	-1.19699	0.0433515	0.383011	Blm	3R	11736810	11741783	-	4806	protein_coding	- && Q9VGI8.1 RecName: Full=Bloom syndrome protein homolog; Short=Dmblm; AltName: Full=Bloom syndrome helicase ortholog; AltName: Full=Mutagen-sensitive protein 309; AltName: Full=RecQ helicase homolog && PF00271:Helicase conserved C-terminal domain|PF09382:RQC domain|PF00270:DEAD/DEAH box helicase|PF16124:RecQ zinc-binding|PF00570:HRDC domain	DEAD
FBgn0026148	7.32811	5.74903	37.5401	16.6544	6.53857	27.0973	-2.04889	0.0433898	0.383011	CG12253	2L	10987806	10989241	+	1240	protein_coding	- && - && PF13359:DDE superfamily endonuclease	-
FBgn0261053	155.984	155.224	100.717	74.9447	155.604	87.8311	0.824948	0.0434503	0.383111	Cad86C	3R	10827079	10849030	+	7321	protein_coding	- && Q9VGW1.3 RecName: Full=Cadherin-86C; Flags: Precursor && PF00028:Cadherin domain	Cadherin
FBgn0041627	117.25	152.924	119.945	495.931	135.087	307.938	-1.1891	0.0435426	0.383111	Ku80	2L	15768630	15771159	-	2304	protein_coding	- && - && PF02735:Ku70/Ku80 beta-barrel domain|PF08785:Ku C terminal domain like|PF03731:Ku70/Ku80 N-terminal alpha/beta domain	-
FBgn0032770	217.75	488.668	210.591	171.17	353.209	190.881	0.886932	0.0435505	0.383111	CG13086	2L	19364375	19365470	+	690	protein_coding	- && - && -	-
FBgn0030246	1136.9	972.736	1095.99	2546.27	1054.82	1821.13	-0.787741	0.0435739	0.383111	CG1582	X	10894747	10899302	-	4243	protein_coding	- && Q6P158.2 RecName: Full=Putative ATP-dependent RNA helicase DHX57; AltName: Full=DEAH box protein 57 && PF04408:Helicase associated domain (HA2)|PF00270:DEAD/DEAH box helicase|PF05773:RWD domain|PF07717:Oligonucleotide/oligosaccharide-binding (OB)-fold|PF00642:Zinc finger C-x8-C-x5-C-x3-H type (and similar)|PF00271:Helicase conserved C-terminal domain	HA2
FBgn0063497	1278.23	1334.93	946.744	940.973	1306.58	943.858	0.469103	0.0436106	0.383111	GstE3	2R	18400713	18401467	+	755	protein_coding	- && P46430.1 RecName: Full=Glutathione S-transferase 1; AltName: Full=GST class-theta [Manduca sexta] && PF00043:Glutathione S-transferase, C-terminal domain|PF13417:Glutathione S-transferase, N-terminal domain	GST_C
FBgn0046875	7.32811	25.2957	1.83123	2.77573	16.3119	2.30348	2.82134	0.0437137	0.383649	Obp83g	3R	6111671	6112302	-	569	protein_coding	- && - && PF01395:PBP/GOBP family	-
FBgn0027788	3.14062	10.3483	0	0	6.74444	0	5.31356	0.0438918	1	Hey	2R	7995438	7998278	-	1687	protein_coding	- && Q7KM13.1 RecName: Full=Hairy/enhancer-of-split related with YRPW motif protein && PF07527:Hairy Orange|PF00010:Helix-loop-helix DNA-binding domain	HLH
FBgn0260962	750.608	806.014	929.347	1439.68	778.311	1184.51	-0.605924	0.0439973	0.385679	pic	3R	13052245	13056725	+	3881	protein_coding	- && Q9XYZ5.1 RecName: Full=DNA damage-binding protein 1; Short=D-DDB1; AltName: Full=Damage-specific DNA-binding protein 1; AltName: Full=Protein piccolo && PF03178:CPSF A subunit region|PF10433:Mono-functional DNA-alkylating methyl methanesulfonate N-term	-
FBgn0002873	32.4531	16.0973	107.127	34.234	24.2752	70.6804	-1.53856	0.0440672	0.385679	mud	X	14247732	14258595	+	8895	protein_coding	- && - && -	-
FBgn0052675	4017.9	1998.36	1806.5	1900.45	3008.13	1853.48	0.698778	0.0440716	0.385679	Tango5	X	10760048	10764413	-	3578	protein_coding	- && Q68EQ9.1 RecName: Full=Vacuole membrane protein 1; AltName: Full=Transmembrane protein 49 && -	-
FBgn0010105	171.687	134.527	75.9959	95.3001	153.107	85.648	0.838878	0.0441319	0.385736	comm	3L	15721511	15728430	-	2495	protein_coding	- && Q24139.1 RecName: Full=Protein commissureless && PF15957:Commissureless	-
FBgn0010197	13.6094	21.8463	2.74684	3.70097	17.7278	3.22391	2.4579	0.0441624	0.385736	Gyc32E	2L	11138759	11149101	-	3845	protein_coding	- && Q07553.4 RecName: Full=Guanylate cyclase 32E; Flags: Precursor && PF00211:Adenylate and Guanylate cyclase catalytic domain|PF01094:Receptor family ligand binding region|PF07714:Protein tyrosine kinase	Guanylate_cyc
FBgn0029915	54.4374	41.393	74.1646	128.609	47.9152	101.387	-1.07972	0.0442336	0.385989	CG14434	X	6851909	6867194	-	1507	protein_coding	- && - && PF01928:CYTH domain	-
FBgn0026565	286.843	388.635	204.182	222.058	337.739	213.12	0.663627	0.0442889	0.386103	Ass	3R	6642262	6644434	-	1456	protein_coding	- && O97069.1 RecName: Full=Argininosuccinate synthase; AltName: Full=Citrulline--aspartate ligase && PF00764:Arginosuccinate synthase	-
FBgn0051199	667.905	656.54	433.085	486.678	662.222	459.882	0.526109	0.0443999	0.38644	CG31199	3R	20742800	20743869	-	1013	protein_coding	- && - && PF00089:Trypsin	Trypsin
FBgn0033268	107.828	34.4942	28.384	24.0563	71.1611	26.2202	1.44258	0.0444121	0.38644	Obp44a	2R	8134170	8135315	-	1076	protein_coding	- && - && PF01395:PBP/GOBP family	-
FBgn0036738	0	1.14981	22.8903	1.85049	0.574903	12.3704	-4.47819	0.044581	1	CG7542	3L	17549826	17550980	+	1155	protein_coding	- && P17205.2 RecName: Full=Serine proteases 1/2; AltName: Full=Protein Jonah 99Cii/99Ciii; Flags: Precursor && PF00089:Trypsin	Trypsin
FBgn0038299	5151.66	1714.36	1466.81	2176.17	3433.01	1821.49	0.914469	0.0446103	0.387611	Spn88Eb	3R	15206703	15208762	-	1431	protein_coding	- && Q60854.1 RecName: Full=Serpin B6; AltName: Full=Placental thrombin inhibitor; AltName: Full=Proteinase inhibitor 6; Short=PI-6 && PF00079:Serpin (serine protease inhibitor)	Serpin
FBgn0037835	262.765	250.658	543.874	310.882	256.712	427.378	-0.735331	0.0446314	0.387611	CG14687	3R	10792904	10793643	+	740	protein_coding	- && - && PF00612:IQ calmodulin-binding motif	IQ
FBgn0022768	858.436	823.262	630.857	549.595	840.849	590.226	0.510612	0.0448032	0.388688	Pp2C1	X	4679988	4686903	-	5675	protein_coding	- && O15297.1 RecName: Full=Protein phosphatase 1D; AltName: Full=Protein phosphatase 2C isoform delta; Short=PP2C-delta; AltName: Full=Protein phosphatase magnesium-dependent 1 delta; AltName: Full=p53-induced protein phosphatase 1 && PF00481:Protein phosphatase 2C	PP2C
FBgn0029821	13972.6	21464.6	11535.8	12563.9	17718.6	12049.8	0.556226	0.0448404	0.388688	CG4020	X	5905746	5908001	+	1886	protein_coding	- && A1ZAI5.1 RecName: Full=Putative fatty acyl-CoA reductase CG5065 && PF03015:Male sterility protein|PF07993:Male sterility protein	NAD_binding_4
FBgn0036191	218.797	210.415	355.258	305.33	214.606	330.294	-0.621957	0.0450514	0.389253	Sugb	3L	11683980	11690155	+	3830	protein_coding	- && Q9VTM0.2 RecName: Full=Biogenesis of lysosome-related organelles complex 1 subunit 6; Short=BLOC-1 subunit 6; AltName: Full=Pallid protein homolog && PF12832:MFS_1 like family|PF03825:Nucleoside H+ symporter	Nuc_H_symport
FBgn0033065	14822.7	16224.9	10055.3	12432.5	15523.8	11243.9	0.465336	0.0450696	0.389253	Cyp6w1	2R	6173684	6176195	+	2392	protein_coding	- && Q9V9L1.1 RecName: Full=Probable cytochrome P450 6w1; AltName: Full=CYPVIW1 && PF00067:Cytochrome P450	p450
FBgn0033101	1005	1356.77	813.064	810.513	1180.89	811.789	0.540423	0.045109	0.389253	CG9436	2R	6757601	6758903	-	1303	protein_coding	- && P07943.3 RecName: Full=Aldose reductase; Short=AR; AltName: Full=Aldehyde reductase && PF00248:Aldo/keto reductase family	Aldo_ket_red
FBgn0264443	76.4218	85.0857	25.6372	47.1874	80.7537	36.4123	1.14912	0.045119	0.389253	CG43861	2L	19968684	20017282	-	3707	protein_coding	- && - && -	-
FBgn0053510	10.4687	3.44942	18.3123	40.7107	6.95908	29.5115	-2.0749	0.0451544	0.389253	CG33510	2L	21082643	21084326	-	1566	protein_coding	- && - && PF02958:Ecdysteroid kinase	-
FBgn0031360	5215.52	6929.88	3596.53	4741.87	6072.7	4169.2	0.542525	0.0451717	0.389253	CG31937	2L	1729887	1731070	+	1184	protein_coding	- && Q9CXR1.2 RecName: Full=Dehydrogenase/reductase SDR family member 7; AltName: Full=Retinal short-chain dehydrogenase/reductase 4; Short=retSDR4; Flags: Precursor && PF00106:short chain dehydrogenase	adh_short
FBgn0024294	32.4531	14.9475	7.3249	2.77573	23.7003	5.05032	2.2317	0.0452427	0.389253	Spn43Aa	2R	7147692	7149289	+	1294	protein_coding	- && Q7YTY6.1 RecName: Full=Serine protease inhibitor 42Dd; Short=Serpin 42Dd; Flags: Precursor && PF00079:Serpin (serine protease inhibitor)	Serpin
FBgn0014879	126.672	200.066	374.486	214.657	163.369	294.571	-0.851709	0.045282	0.389253	Set	3R	15263552	15265253	+	1169	protein_coding	- && P53997.2 RecName: Full=Protein SET && PF00956:Nucleosome assembly protein (NAP)	-
FBgn0264272	569.499	1019.88	459.638	522.763	794.689	491.2	0.693633	0.0452887	0.389253	mwh	3L	1200786	1232700	+	4747	protein_coding	- && - && PF06367:Diaphanous FH3 Domain	-
FBgn0286723	1735.72	1973.07	2485.89	2599.93	1854.39	2542.91	-0.455635	0.0453704	0.389589	hll	2L	14027001	14029368	+	2206	protein_coding	- && Q9V3U0.1 RecName: Full=Long-chain-fatty-acid--CoA ligase bubblegum-like && PF00501:AMP-binding enzyme	AMP-binding
FBgn0264839	72.2343	55.1907	10.0717	35.1593	63.7125	22.6155	1.49548	0.0454622	0.390011	asRNA:CR44047	3R	20827095	20828212	+	816	ncRNA	- && B4PPT4.1 RecName: Full=Adenylosuccinate synthetase; Short=AMPSase; Short=AdSS; AltName: Full=IMP--aspartate ligase && -	-
novel.86	867.858	1137.16	474.287	787.382	1002.51	630.835	0.668144	0.0455796	0.390651	-	Y_mapped_Scaffold_18_D1698	11176	28805	-	14974	-	- && Q95SX7.1 RecName: Full=Probable RNA-directed DNA polymerase from transposon BS; AltName: Full=Reverse transcriptase && -	-
FBgn0027093	447.015	472.571	618.039	709.662	459.793	663.85	-0.529984	0.0457559	0.391071	ArgRS	X	15841769	15844145	-	2135	protein_coding	- && Q9VXN4.1 RecName: Full=Probable arginine--tRNA ligase, cytoplasmic; AltName: Full=Arginyl-tRNA synthetase; Short=ArgRS && PF00750:tRNA synthetases class I (R)|PF05746:DALR anticodon binding domain|PF03485:Arginyl tRNA synthetase N terminal domain	-
FBgn0035670	10.4687	9.19845	5.49368	91.5991	9.83359	48.5464	-2.30265	0.045786	0.391071	CG10472	3L	6061372	6062910	-	936	protein_coding	- && Q00871.1 RecName: Full=Chymotrypsin BI; Flags: Precursor && PF00089:Trypsin	Trypsin
FBgn0034528	237.64	144.876	320.465	315.508	191.258	317.986	-0.732023	0.0457973	0.391071	CG11180	2R	20620914	20623429	-	2460	protein_coding	- && Q96BK5.2 RecName: Full=PIN2/TERF1-interacting telomerase inhibitor 1; AltName: Full=Liver-related putative tumor suppressor; AltName: Full=Pin2-interacting protein X1; AltName: Full=Protein 67-11-3; AltName: Full=TRF1-interacting protein 1 && PF01585:G-patch domain	G-patch
FBgn0001341	120.39	137.977	160.232	312.732	129.184	236.482	-0.87262	0.0457996	0.391071	Mybbp1A	X	629773	633633	+	3680	protein_coding	- && - && PF04931:DNA polymerase phi	-
FBgn0000405	45.0156	47.1421	1865.1	12.9534	46.0788	939.028	-4.34901	0.0459848	0.391074	CycB	2R	22803521	22806948	-	3047	protein_coding	- && P20439.2 RecName: Full=G2/mitotic-specific cyclin-B && PF00134:Cyclin, N-terminal domain|PF02984:Cyclin, C-terminal domain	Cyclin_C
FBgn0262601	227.172	275.954	360.751	408.032	251.563	384.392	-0.612256	0.0459893	0.391074	SmB	2L	10425483	10426627	-	776	protein_coding	- && Q05856.1 RecName: Full=Small nuclear ribonucleoprotein-associated protein B; Short=snRNP-B; AltName: Full=Sm protein B; Short=Sm-B; Short=SmB && PF01423:LSM domain	LSM
FBgn0028490	29876.7	26984.8	16521.3	23272.7	28430.8	19897	0.514908	0.0460949	0.391074	CG31705	2L	11523021	11528205	-	2760	protein_coding	- && - && PF16072:Domain of unknown function (DUF4813)	-
FBgn0051300	46.0624	71.288	23.8059	24.9816	58.6752	24.3938	1.26479	0.0461054	0.391074	CG31300	3R	25283620	25285224	+	1474	protein_coding	- && - && PF02958:Ecdysteroid kinase	-
FBgn0026721	14651	16089.2	8506.96	12646.2	15370.1	10576.6	0.53925	0.0461229	0.391074	fat-spondin	2R	17054002	17059299	+	2475	protein_coding	- && P35446.1 RecName: Full=Spondin-1; AltName: Full=F-spondin; Flags: Precursor && PF06468:Spondin_N|PF00014:Kunitz/Bovine pancreatic trypsin inhibitor domain|PF02014:Reeler domain|PF00090:Thrombospondin type 1 domain	Kunitz_BPTI
FBgn0014863	1139	1771.85	1002.6	927.094	1455.43	964.845	0.592802	0.0461411	0.391074	Mlp84B	3R	7112850	7117732	-	3136	protein_coding	- && Q24400.1 RecName: Full=Muscle LIM protein Mlp84B && PF00412:LIM domain	LIM
FBgn0260456	438.64	344.942	518.237	675.428	391.791	596.832	-0.606705	0.0461581	0.391074	CG4806	2R	24666158	24668343	-	2070	protein_coding	- && Q8CGC6.4 RecName: Full=RNA-binding protein 28; AltName: Full=RNA-binding motif protein 28 && PF00076:RNA recognition motif. (a.k.a. RRM, RBD, or RNP domain)	RRM_1
FBgn0013710	188.437	298.95	154.739	128.609	243.693	141.674	0.781485	0.0461804	0.391074	mt:tRNA:Tyr-GTA	mitochondrion_genome	1403	1468	-	66	tRNA	- && - && -	-
FBgn0001149	10200.7	6237.7	11917.6	12675.8	8219.22	12296.7	-0.581148	0.0461848	0.391074	GstD1	3R	12367817	12369268	-	843	protein_coding	- && P20432.1 RecName: Full=Glutathione S-transferase D1; AltName: Full=DDT-dehydrochlorinase && PF00043:Glutathione S-transferase, C-terminal domain|PF02798:Glutathione S-transferase, N-terminal domain	GST_N
FBgn0029161	7.32811	11.4981	0.915613	0	9.41309	0.457806	4.35421	0.0462868	1	slmo	2L	6046516	6048706	-	2191	protein_coding	- && Q9V3U9.1 RecName: Full=Protein slowmo && PF04707:PRELI-like family	MSF1
FBgn0031971	6559.71	5106.29	7272.71	9493.92	5833	8383.32	-0.523233	0.0463028	0.391711	Sirup	2L	7998869	7999676	+	727	protein_coding	- && Q9VLU6.2 RecName: Full=Succinate dehydrogenase assembly factor 4, mitochondrial; Short=SDH assembly factor 4; Short=SDHAF4; AltName: Full=Starvation-upregulated protein; Flags: Precursor && PF07896:Protein of unknown function (DUF1674)	-
FBgn0002872	53.3905	50.5915	134.595	77.7205	51.991	106.158	-1.02973	0.0464296	0.392068	mu2	3L	1942734	1947475	-	4117	protein_coding	- && - && -	-
FBgn0003447	27.2187	20.6965	163.895	13.8787	23.9576	88.8867	-1.89071	0.0464311	0.392068	sn	X	7964024	7986601	+	3507	protein_coding	- && Q24524.1 RecName: Full=Protein singed && PF06268:Fascin domain	-
FBgn0032785	203.093	225.362	299.405	364.546	214.228	331.976	-0.632252	0.0464736	0.392068	CG10026	2L	19454256	19457723	+	2091	protein_coding	- && - && PF00650:CRAL/TRIO domain	-
FBgn0051248	152.844	280.553	128.186	111.029	216.698	119.608	0.856178	0.0465698	0.39244	CG31248	3R	7129320	7130908	+	977	protein_coding	- && - && -	-
FBgn0052547	49.203	43.6926	20.1435	15.7291	46.4478	17.9363	1.37297	0.0466036	0.39244	CG32547	X	18443027	18479487	-	4570	protein_coding	- && - && PF00001:7 transmembrane receptor (rhodopsin family)	7tm_1
FBgn0035867	550.655	540.409	308.562	416.36	545.532	362.461	0.589937	0.0467719	0.393133	CG13671	3L	8300064	8302341	+	2278	protein_coding	- && - && -	-
FBgn0034162	2909.26	2980.3	2048.23	2283.5	2944.78	2165.86	0.443212	0.0467719	0.393133	CG6426	2R	16869402	16871851	+	713	protein_coding	- && - && PF05497:Destabilase	-
FBgn0261794	662.671	661.139	426.676	493.155	661.905	459.915	0.525292	0.0469304	0.393352	kcc	2R	23907654	23925066	+	4946	protein_coding	- && Q9UHW9.2 RecName: Full=Solute carrier family 12 member 6; AltName: Full=Electroneutral potassium-chloride cotransporter 3; AltName: Full=K-Cl cotransporter 3 && PF00324:Amino acid permease|PF03522:Solute carrier family 12	AA_permease
FBgn0036640	25.125	11.4981	54.9368	45.3369	18.3115	50.1369	-1.44774	0.046943	0.393352	nxf2	3L	16576859	16580306	-	2917	protein_coding	- && Q9VV73.1 RecName: Full=Nuclear RNA export factor 2 && -	-
FBgn0053470	784.108	1291.23	2094.01	1284.24	1037.67	1689.12	-0.703232	0.0469547	0.393352	CG33470	2R	13411739	13413085	+	1159	protein_coding	- && Q8ML70.3 RecName: Full=Immune-induced peptides; Contains: RecName: Full=Immune-induced peptide 10; Short=DIM-10; Contains: RecName: Full=Immune-induced peptide 12; Short=DIM-12; Contains: RecName: Full=Immune-induced peptide 13; Short=DIM-13; Contains: RecName: Full=Immune-induced peptide 24; Short=DIM-24; Flags: Precursor && -	-
FBgn0029999	373.734	266.755	318.633	915.066	320.244	616.85	-0.945343	0.04697	0.393352	CG1575	X	8117012	8119130	+	2119	protein_coding	- && Q5ZM41.1 RecName: Full=Testis-expressed sequence 10 protein homolog && PF12333:Rix1 complex component involved in 60S ribosome maturation	-
FBgn0003961	198.906	43.6926	305.815	249.816	121.299	277.815	-1.19335	0.0470449	0.393619	Uro	2L	7780085	7781415	+	1262	protein_coding	- && P16163.2 RecName: Full=Uricase; AltName: Full=Urate oxidase && PF01014:Uricase	-
FBgn0026876	37.6874	41.393	111.705	61.0661	39.5402	86.3854	-1.12816	0.0473011	0.395112	CG11403	X	1236873	1239884	-	2890	protein_coding	- && F1R345.1 RecName: Full=ATP-dependent DNA helicase DDX11; AltName: Full=DEAD/H-box protein 11 && PF13307:Helicase C-terminal domain|PF06733:DEAD	-
FBgn0030060	2169.12	1242.94	1219.6	936.347	1706.03	1077.97	0.662529	0.0473097	0.395112	CG2004	X	8712472	8714924	-	2028	protein_coding	- && - && PF02958:Ecdysteroid kinase	-
FBgn0026619	592.53	601.349	445.903	374.724	596.94	410.314	0.540791	0.0474317	0.395769	Taz	2R	12753026	12756414	-	2174	protein_coding	- && Q9V6G5.2 RecName: Full=Tafazzin homolog; Short=dTAZ && PF01553:Acyltransferase	Acyltransferase
FBgn0026262	359.078	352.991	663.819	440.416	356.034	552.118	-0.632978	0.0476324	0.396659	bip2	4	459887	466828	-	4514	protein_coding	- && Q5VWG9.1 RecName: Full=Transcription initiation factor TFIID subunit 3; AltName: Full=140 kDa TATA box-binding protein-associated factor; AltName: Full=TBP-associated factor 3; AltName: Full=Transcription initiation factor TFIID 140 kDa subunit; Short=TAF(II)140; Short=TAF140; Short=TAFII-140; Short=TAFII140 && PF07524:Bromodomain associated|PF00628:PHD-finger	PHD
FBgn0039210	64.9061	65.539	114.452	123.057	65.2226	118.755	-0.864573	0.0477034	0.396659	CG13625	3R	24583067	24585160	-	2094	protein_coding	- && P30640.1 RecName: Full=BUD13 homolog && PF09736:Pre-mRNA-splicing factor of RES complex	-
FBgn0031771	8315.31	8133.73	6106.22	6240.77	8224.52	6173.5	0.41385	0.0477107	0.396659	ND-51	2L	6060842	6062757	-	1590	protein_coding	- && Q0MQI4.1 RecName: Full=NADH dehydrogenase [ubiquinone] flavoprotein 1, mitochondrial; AltName: Full=Complex I-51kD; Short=CI-51kD; AltName: Full=NADH-ubiquinone oxidoreductase 51 kDa subunit; Flags: Precursor && PF01512:Respiratory-chain NADH dehydrogenase 51 Kd subunit|PF10531:SLBB domain|PF10589:NADH-ubiquinone oxidoreductase-F iron-sulfur binding region	-
FBgn0031023	1606.95	1357.92	1072.18	1056.63	1482.44	1064.41	0.478071	0.0477119	0.396659	CG14200	X	19495505	19518402	+	8141	protein_coding	- && - && PF00855:PWWP domain	PWWP
FBgn0039274	167.5	172.471	206.929	384.901	169.985	295.915	-0.79976	0.0477889	0.396938	CG11920	3R	25074877	25076382	+	1012	protein_coding	- && Q8VHZ7.1 RecName: Full=U3 small nucleolar ribonucleoprotein protein IMP4; Short=U3 snoRNP protein IMP4 >Q5PQR5.1 RecName: Full=U3 small nucleolar ribonucleoprotein protein IMP4; Short=U3 snoRNP protein IMP4 && PF04427:Brix domain	-
FBgn0029823	50213.3	23521.6	20974.9	24283	36867.4	22628.9	0.704189	0.0479721	0.398099	Shmt	X	5913067	5916797	-	2518	protein_coding	- && Q3SZ20.1 RecName: Full=Serine hydroxymethyltransferase, mitochondrial; Short=SHMT; AltName: Full=Glycine hydroxymethyltransferase; AltName: Full=Serine methylase; Flags: Precursor && PF00464:Serine hydroxymethyltransferase	SHMT
FBgn0031713	1364.08	1583.28	846.026	1171.36	1473.68	1008.69	0.546864	0.0480174	0.398113	Coq6	2L	5530620	5532223	-	1604	protein_coding	- && Q9VMQ5.1 RecName: Full=Ubiquinone biosynthesis monooxygenase COQ6, mitochondrial; Flags: Precursor && PF01494:FAD binding domain	FAD_binding_3
FBgn0004509	865.764	883.051	1010.84	1669.14	874.408	1339.99	-0.615833	0.0480656	0.398152	Fur1	3R	25347431	25473058	-	9128	protein_coding	- && P30430.2 RecName: Full=Furin-like protease 1, isoform 1-CRR; Short=Furin-1; AltName: Full=Kex2-like endoprotease 1; AltName: Full=dKLIP-1; Flags: Precursor && PF16470:Peptidase S8 pro-domain|PF01483:Proprotein convertase P-domain|PF00082:Subtilase family	Peptidase_S8
FBgn0016076	3240.07	2313.41	4015.88	3913.78	2776.74	3964.83	-0.51373	0.0481426	0.398429	vri	2L	5288944	5311223	+	4739	protein_coding	- && - && PF07716:Basic region leucine zipper	bZIP_2
FBgn0032049	8.37499	14.9475	32.9621	38.8602	11.6612	35.9111	-1.62766	0.0482071	0.398603	Bace	2L	8494893	8496307	-	1415	protein_coding	- && Q03168.2 RecName: Full=Lysosomal aspartic protease; Flags: Precursor && PF00026:Eukaryotic aspartyl protease	Asp
FBgn0033174	372.687	163.273	87.8988	176.722	267.98	132.31	1.01919	0.0483124	0.398757	CG11125	2R	7447473	7449995	+	2177	protein_coding	- && - && PF00173:Cytochrome b5-like Heme/Steroid binding domain|PF13864:Calmodulin-binding	-
FBgn0026431	60.7187	29.895	98.8862	94.3748	45.3068	96.6305	-1.08915	0.0483131	0.398757	Grip75	2L	10483295	10485857	+	2141	protein_coding	- && Q9VKU7.2 RecName: Full=Gamma-tubulin complex component 4 homolog; AltName: Full=Gamma-ring complex protein 75 kDa; Short=d75p; Short=dGrip75 && PF04130:Spc97 / Spc98 family	-
FBgn0014868	1976.5	2231.77	1149.09	1707.07	2104.14	1428.08	0.559115	0.0484151	0.399239	Ost48	X	9156929	9158515	-	1513	protein_coding	- && Q24319.2 RecName: Full=Dolichyl-diphosphooligosaccharide--protein glycosyltransferase 48 kDa subunit; Short=DDOST 48 kDa subunit; Short=Oligosaccharyl transferase 48 kDa subunit; AltName: Full=DmOST50; Short=DrOST; AltName: Full=OST5OP; Flags: Precursor && PF03345:Oligosaccharyltransferase 48 kDa subunit beta	-
FBgn0010497	37.6874	13.7977	85.152	50.8884	25.7426	68.0202	-1.39672	0.048829	0.402289	dmGlut	2L	12027438	12034122	+	2426	protein_coding	- && Q9V7S5.1 RecName: Full=Putative inorganic phosphate cotransporter && PF07690:Major Facilitator Superfamily	MFS_1
FBgn0031604	396.765	336.893	456.891	682.83	366.829	569.86	-0.635126	0.0490836	0.404023	Elp3	2L	4444732	4446765	+	1863	protein_coding	- && Q9VQZ6.1 RecName: Full=Probable elongator complex protein 3 && PF04055:Radical SAM superfamily|PF00583:Acetyltransferase (GNAT) family|PF16199:Radical_SAM C-terminal domain	Radical_SAM
FBgn0028523	53.3905	63.2394	93.3925	129.534	58.315	111.463	-0.935478	0.0491627	0.40431	CG5888	2L	16400175	16448469	-	1883	protein_coding	- && - && PF13855:Leucine rich repeat	-
FBgn0002609	9.42186	20.6965	2.74684	1.85049	15.0592	2.29866	2.70876	0.0496047	0.407383	E(spl)m3-HLH	3R	26021823	26023127	+	1305	protein_coding	- && Q01068.1 RecName: Full=Enhancer of split m3 protein; Short=E(spl)m3; AltName: Full=HLH-m3 && PF00010:Helix-loop-helix DNA-binding domain	HLH
FBgn0024984	3.14062	0	40.287	0.925244	1.57031	20.6061	-3.69132	0.0496254	0.407383	CG3457	X	2187820	2188919	+	1100	protein_coding	- && - && -	-
FBgn0030373	0	0	12.8186	1.85049	0	7.33453	-5.18391	0.0496333	1	moon	X	12072008	12072818	-	811	protein_coding	- && - && -	-
FBgn0014859	14.6562	6.89884	81.4895	10.1777	10.7775	45.8336	-2.08438	0.0498179	0.408596	Hr38	2L	20683462	20714588	-	7704	protein_coding	- && P49869.3 RecName: Full=Probable nuclear hormone receptor HR38; Short=dHR38; AltName: Full=Nuclear receptor subfamily 4 group A member 4 && PF00104:Ligand-binding domain of nuclear hormone receptor|PF00105:Zinc finger, C4 type (two domains)	zf-C4
FBgn0263220	46.0624	39.0934	78.7427	92.5244	42.5779	85.6335	-1.00695	0.04987	0.408657	Hk	X	10233347	10263485	-	10725	protein_coding	- && Q27955.1 RecName: Full=Voltage-gated potassium channel subunit beta-2; AltName: Full=K(+) channel subunit beta-2; AltName: Full=Kv-beta-2 && PF00248:Aldo/keto reductase family	Aldo_ket_red
FBgn0032021	55.4843	63.2394	26.5528	25.9068	59.3618	26.2298	1.17781	0.0499907	0.408791	CG7781	2L	8321280	8325409	-	1981	protein_coding	- && - && -	-
FBgn0034247	349.656	768.071	262.781	368.247	558.863	315.514	0.824245	0.0499987	0.408791	CG6484	2R	17582007	17584012	-	1590	protein_coding	- && B4LPX5.2 RecName: Full=Facilitated trehalose transporter Tret1 && PF00083:Sugar (and other) transporter	Sugar_tr
FBgn0029722	28.2656	24.1459	7.3249	7.40195	26.2058	7.36343	1.83203	0.0500485	0.408791	CG7024	X	4705309	4707504	+	1878	protein_coding	- && P52899.1 RecName: Full=Probable pyruvate dehydrogenase E1 component subunit alpha, mitochondrial; Short=PDHE1-A; Flags: Precursor && PF00676:Dehydrogenase E1 component	-
FBgn0026268	123.531	97.7336	65.9241	50.8884	110.632	58.4063	0.922192	0.0501038	0.408791	antdh	X	11168030	11169058	-	950	protein_coding	- && D2WKD9.2 RecName: Full=Farnesol dehydrogenase; AltName: Full=NADP+-dependent farnesol dehydrogenase 1; Short=AaSDR-1 && PF00106:short chain dehydrogenase	adh_short
FBgn0038893	188.437	140.276	171.22	477.426	164.357	324.323	-0.979972	0.0501207	0.408791	Archease	3R	21661186	21662972	-	1222	protein_coding	- && Q9VD92.1 RecName: Full=Protein archease-like && PF01951:Archease protein family (MTH1598/TM1083)	-
FBgn0002715	15.7031	24.1459	57.6836	43.4865	19.9245	50.585	-1.34748	0.0501545	0.408791	mei-S332	2R	22122101	22124566	+	1703	protein_coding	- && Q24141.1 RecName: Full=Shugoshin; AltName: Full=Meiotic protein S332 && PF07557:Shugoshin C terminus|PF07558:Shugoshin N-terminal coiled-coil region	-
FBgn0003943	6303.22	6127.32	4128.5	4990.76	6215.27	4559.63	0.446912	0.0502625	0.409306	Ubi-p63E	3L	3899259	3903184	-	3138	protein_coding	- && P0CG69.1 RecName: Full=Polyubiquitin; Contains: RecName: Full=Ubiquitin; Flags: Precursor && PF00240:Ubiquitin family	ubiquitin
FBgn0002899	29.3125	12.6479	78.7427	37.935	20.9802	58.3388	-1.47077	0.050321	0.409418	mus301	3L	8137808	8142014	+	3364	protein_coding	- && Q8TDG4.2 RecName: Full=Helicase POLQ-like; AltName: Full=Mus308-like helicase; AltName: Full=POLQ-like helicase && PF00271:Helicase conserved C-terminal domain|PF00270:DEAD/DEAH box helicase	Helicase_C
FBgn0034537	198.906	212.714	308.562	316.433	205.81	312.497	-0.602783	0.0504013	0.409707	DMAP1	2R	20644036	20645865	+	1584	protein_coding	- && Q9JI44.1 RecName: Full=DNA methyltransferase 1-associated protein 1; Short=DNMAP1; Short=DNMT1-associated protein 1; AltName: Full=MAT1-mediated transcriptional repressor && PF05499:DNA methyltransferase 1-associated protein 1 (DMAP1)|PF16282:SANT/Myb-like domain of DAMP1	-
FBgn0030812	324.531	296.65	651.001	364.546	310.59	507.773	-0.709066	0.0504852	0.410024	wcy	X	17068717	17077897	-	5734	protein_coding	- && Q5U4Q0.1 RecName: Full=WW domain-containing adapter protein with coiled-coil && PF00397:WW domain	WW
novel.15	46.0624	43.6926	77.8271	100.852	44.8775	89.3393	-0.992883	0.0506137	0.410626	-	2R	3762441	3786609	+	2387	-	- && - && -	-
FBgn0035337	37.6874	54.0409	74.1646	115.655	45.8642	94.91	-1.05105	0.0506491	0.410626	CG15877	3L	2376484	2377556	-	1018	protein_coding	- && - && PF10180:Uncharacterised conserved protein (DUF2373)	-
FBgn0032988	708.733	768.071	958.647	1116.77	738.402	1037.71	-0.491037	0.0506975	0.410654	Tif-IA	2L	22249876	22258260	+	2140	protein_coding	- && B2RS91.1 RecName: Full=RNA polymerase I-specific transcription initiation factor RRN3 && PF05327:RNA polymerase I specific transcription initiation factor RRN3	RRN3
FBgn0264490	349.656	347.242	847.858	369.172	348.449	608.515	-0.804394	0.0507463	0.410686	Eip93F	3R	21949114	22014539	+	12686	protein_coding	- && Q95YM8.1 RecName: Full=Mushroom body large-type Kenyon cell-specific protein 1 && PF05225:helix-turn-helix, Psq domain	HTH_psq
FBgn0261872	344.421	371.388	511.828	521.837	357.904	516.833	-0.530335	0.0509639	0.411966	scaf6	3L	17036859	17042574	-	3831	protein_coding	- && Q8CGZ0.1 RecName: Full=Calcium homeostasis endoplasmic reticulum protein; AltName: Full=SR-related CTD-associated factor 6 && PF01805:Surp module|PF01585:G-patch domain	G-patch
FBgn0038752	64.9061	93.1343	35.7089	39.7855	79.0202	37.7472	1.0647	0.0509946	0.411966	CG4462	3R	19921744	19925371	-	2194	protein_coding	- && Q9WTW5.1 RecName: Full=Solute carrier family 22 member 3; AltName: Full=Organic cation transporter 3 && PF07690:Major Facilitator Superfamily	MFS_1
FBgn0038964	892.983	800.265	1009.01	1508.15	846.624	1258.58	-0.571857	0.0511457	0.412822	Nop56	3R	22419095	22421068	-	1746	protein_coding	- && Q9D6Z1.2 RecName: Full=Nucleolar protein 56; AltName: Full=Nucleolar protein 5A && PF01798:snoRNA binding domain, fibrillarin|PF08156:NOP5NT (NUC127) domain	-
FBgn0037485	10.4687	1.14981	36.6245	19.4301	5.80927	28.0273	-2.25654	0.0513836	0.414377	CG14606	3R	7214339	7217083	-	1925	protein_coding	- && Q8MKK4.1 RecName: Full=Facilitated trehalose transporter Tret1-2 homolog; Short=DmTret1-2 && PF00083:Sugar (and other) transporter	Sugar_tr
FBgn0002924	35.5937	22.9961	120.861	36.0845	29.2949	78.4727	-1.41971	0.0515034	0.414977	ncd	3R	29804290	29807127	-	2720	protein_coding	- && P20480.1 RecName: Full=Protein claret segregational && PF00225:Kinesin motor domain	Kinesin
FBgn0024995	244.968	51.7413	50.3587	67.5428	148.355	58.9507	1.33301	0.0517153	0.415829	CG2680	X	2706151	2707427	-	1181	protein_coding	- && P0DKC4.1 RecName: Full=Phosphoglycolate phosphatase 1B, chloroplastic; Flags: Precursor >P0DKC3.1 RecName: Full=Phosphoglycolate phosphatase 1A, chloroplastic; Flags: Precursor && PF13242:HAD-hyrolase-like|PF13344:Haloacid dehalogenase-like hydrolase	-
FBgn0033021	336.046	504.765	715.094	580.128	420.406	647.611	-0.624077	0.0517444	0.415829	CG10417	2R	5360331	5363104	-	2538	protein_coding	- && Q7K4Q5.1 RecName: Full=Probable protein phosphatase CG10417 && PF00481:Protein phosphatase 2C	PP2C
FBgn0034786	1566.12	1257.89	806.655	1116.77	1412.01	961.712	0.554246	0.0517472	0.415829	CG13531	2R	22847832	22853827	-	5665	protein_coding	- && - && PF14649:Spatacsin C-terminus	-
FBgn0039494	889.842	932.493	440.41	738.344	911.168	589.377	0.628546	0.0518117	0.415829	grass	3R	27157948	27159781	+	1391	protein_coding	- && P13582.3 RecName: Full=Serine protease easter; Flags: Precursor && PF00089:Trypsin	Trypsin
FBgn0030481	2115.73	2861.87	1964.91	1397.12	2488.8	1681.01	0.565993	0.0518365	0.415829	CG1662	X	13387563	13389332	+	1770	protein_coding	- && Q6DIY8.1 RecName: Full=Mpv17-like protein 2 && PF04117:Mpv17 / PMP22 family	Mpv17_PMP22
FBgn0023215	88.9842	120.73	411.11	85.1224	104.857	248.116	-1.24323	0.0519924	0.416243	Mnt	X	3671801	3701672	+	4556	protein_coding	- && O08789.2 RecName: Full=Max-binding protein MNT; AltName: Full=Myc antagonist MNT; AltName: Full=Protein ROX && PF00010:Helix-loop-helix DNA-binding domain	HLH
FBgn0038829	2155.51	2383.55	1447.58	1808.85	2269.53	1628.22	0.47906	0.0520081	0.416243	CG17271	3R	20819129	20821848	-	1916	protein_coding	- && Q8NI22.1 RecName: Full=Multiple coagulation factor deficiency protein 2; AltName: Full=Neural stem cell-derived neuronal survival protein; Flags: Precursor >Q5R8Z6.1 RecName: Full=Multiple coagulation factor deficiency protein 2 homolog; Flags: Precursor && PF13499:EF-hand domain pair	-
FBgn0250816	18.8437	18.3969	138.258	9.25244	18.6203	73.755	-1.98594	0.0520682	0.416243	AGO3	3L	23554593	23689640	+	3182	protein_coding	- && Q7PLK0.3 RecName: Full=Protein argonaute-3 && PF02171:Piwi domain|PF02170:PAZ domain	Piwi
FBgn0052075	105.734	117.28	137.342	272.947	111.507	205.144	-0.879727	0.0520726	0.416243	CG32075	3L	11062726	11064941	-	1955	protein_coding	- && - && PF04031:Las1-like	-
FBgn0033523	155.984	217.313	96.1394	121.207	186.649	108.673	0.779564	0.0521157	0.416243	CG12895	2R	10436598	10437382	-	667	protein_coding	- && A1Z897.1 RecName: Full=Succinate dehydrogenase assembly factor 2-B, mitochondrial; Short=SDH assembly factor 2-B; Short=SDHAF2-B; Flags: Precursor && PF03937:Flavinator of succinate dehydrogenase	-
FBgn0033548	92.1249	70.1382	126.355	163.768	81.1315	145.061	-0.836924	0.0522159	0.416679	CG7637	2R	10810556	10810936	-	316	protein_coding	- && Q9V5P6.1 RecName: Full=H/ACA ribonucleoprotein complex subunit 3; AltName: Full=Nucleolar protein 10; AltName: Full=Nucleolar protein family A member 3; AltName: Full=snoRNP protein dNop10 && -	-
FBgn0037683	198.906	129.928	270.106	268.321	164.417	269.213	-0.709957	0.0523292	0.417098	CG18473	3R	9363305	9364838	+	1282	protein_coding	- && Q9VHF2.1 RecName: Full=Phosphotriesterase-related protein; AltName: Full=Parathion hydrolase-related protein && PF02126:Phosphotriesterase family	-
FBgn0036623	7194.11	8392.44	5435.08	6056.64	7793.28	5745.86	0.439679	0.0523828	0.417098	Agpat3	3L	16381772	16385957	-	2401	protein_coding	- && Q9NRZ7.1 RecName: Full=1-acyl-sn-glycerol-3-phosphate acyltransferase gamma; AltName: Full=1-acylglycerol-3-phosphate O-acyltransferase 3; Short=1-AGP acyltransferase 3; Short=1-AGPAT 3; AltName: Full=Lysophosphatidic acid acyltransferase gamma; Short=LPAAT-gamma && PF01553:Acyltransferase|PF16076:Acyltransferase C-terminus	Acyltransferase
FBgn0038851	21.9843	9.19845	3.66245	0.925244	15.5914	2.29385	2.76572	0.0524052	0.417098	dmrt93B	3R	21074007	21076798	+	978	protein_coding	- && Q5UU75.1 RecName: Full=Doublesex- and mab-3-related transcription factor A2; AltName: Full=Doublesex- and mab-3-related transcription factor 5 && PF00751:DM DNA binding domain|PF03474:DMRTA motif	DM
FBgn0025640	1780.73	1845.44	1168.32	1443.38	1813.09	1305.85	0.47345	0.0528827	0.420021	CG13369	X	623468	624765	+	1175	protein_coding	- && Q8R1Q9.1 RecName: Full=Ribokinase; Short=RK && PF00294:pfkB family carbohydrate kinase	PfkB
FBgn0032422	1893.79	2012.16	1535.48	1309.22	1952.98	1422.35	0.45734	0.0529445	0.420021	atilla	2L	12175451	12177886	-	834	protein_coding	- && - && -	-
FBgn0034860	899.264	1252.14	719.672	759.625	1075.7	739.648	0.540069	0.052953	0.420021	CG9812	2R	23412320	23419684	-	1574	protein_coding	- && - && -	-
FBgn0025455	730.718	532.36	1045.63	829.944	631.539	937.787	-0.56997	0.0529562	0.420021	CycT	3L	17551004	17557788	-	6342	protein_coding	- && O96433.2 RecName: Full=Cyclin-T && PF00134:Cyclin, N-terminal domain	-
FBgn0035934	1.04687	1.14981	10.9874	11.1029	1.09834	11.0451	-3.33169	0.0529894	1	TrpA1	3L	8894404	8904790	-	4457	protein_coding	- && Q7Z020.4 RecName: Full=Transient receptor potential cation channel subfamily A member 1; Short=dTRPA1; AltName: Full=Ankyrin-like with transmembrane domains protein 1; Short=dANKTM1 && PF00520:Ion transport protein|PF12796:Ankyrin repeats (3 copies)	Ion_trans
FBgn0011770	4086.99	5454.68	3130.48	3637.13	4770.84	3383.81	0.495529	0.0531098	0.420813	Gip	X	10328877	10329872	-	996	protein_coding	- && P36951.1 RecName: Full=Putative hydroxypyruvate isomerase; AltName: Full=GIP-like protein; AltName: Full=Transient receptor potential locus C protein && PF01261:Xylose isomerase-like TIM barrel	-
FBgn0031548	124.578	139.127	63.1773	84.1972	131.852	73.6872	0.839229	0.0531481	0.420813	CG8852	2L	3525131	3527588	+	2398	protein_coding	- && - && PF13855:Leucine rich repeat	-
FBgn0039319	52.3437	36.7938	52.1899	490.379	44.5687	271.285	-2.60535	0.0533549	0.421806	CG13659	3R	25300891	25302317	+	1301	protein_coding	- && - && PF02958:Ecdysteroid kinase	-
FBgn0033344	26.1718	35.644	4.57806	12.9534	30.9079	8.76574	1.81791	0.0533658	0.421806	CG8252	2R	8909432	8910349	-	918	protein_coding	- && - && PF14469:28 kDa A-kinase anchor	-
FBgn0036007	16895.5	17321.8	26243.3	20574.6	17108.7	23409	-0.452338	0.0535241	0.422231	path	3L	9494555	9505328	-	3195	protein_coding	- && Q9VT04.1 RecName: Full=Proton-coupled amino acid transporter-like protein pathetic && PF01490:Transmembrane amino acid transporter protein	Aa_trans
FBgn0263143	3.14062	11.4981	42.1182	17.5796	7.31934	29.8489	-2.03792	0.0535543	0.422231	vret	3R	22742954	22745581	-	2328	protein_coding	- && Q9VCU7.1 RecName: Full=Protein vreteno && PF00567:Tudor domain	-
FBgn0002948	46.0624	64.3892	160.232	73.0942	55.2258	116.663	-1.08052	0.0536236	0.422231	nod	X	11580772	11585750	+	2449	protein_coding	- && P18105.1 RecName: Full=Kinesin-like protein Nod && PF00225:Kinesin motor domain	Kinesin
FBgn0010452	92.1249	33.3444	169.388	105.478	62.7346	137.433	-1.12821	0.0536462	0.422231	trn	3L	13114271	13118077	+	3365	protein_coding	- && - && PF13855:Leucine rich repeat	-
FBgn0041184	401.999	249.508	470.625	557.922	325.754	514.273	-0.657792	0.0536504	0.422231	Socs36E	2L	18138675	18152417	-	3503	protein_coding	- && O54928.2 RecName: Full=Suppressor of cytokine signaling 5; Short=SOCS-5; AltName: Full=Cytokine-inducible SH2-containing protein 5 && PF07525:SOCS box|PF00017:SH2 domain	SH2
FBgn0260789	96.3123	90.8347	201.435	129.534	93.5735	165.484	-0.822375	0.0537851	0.422375	mxc	X	9236801	9243467	-	6237	protein_coding	- && - && -	-
FBgn0052590	25.125	19.5467	44.865	62.9166	22.3358	53.8908	-1.26872	0.053788	0.422375	CG32590	X	14838352	14839106	-	699	protein_coding	- && Q8IR45.1 RecName: Full=BLOC-1-related complex subunit 8 homolog && PF10167:Uncharacterised conserved protein	-
FBgn0039306	289.984	217.313	298.49	563.473	253.649	430.982	-0.764181	0.0538073	0.422375	RIOK2	3R	25265844	25267757	+	1751	protein_coding	- && Q9CQS5.1 RecName: Full=Serine/threonine-protein kinase RIO2; AltName: Full=RIO kinase 2 && PF01163:RIO1 family|PF09202:Rio2, N-terminal	-
FBgn0035829	48.1562	72.4378	130.017	99.9263	60.297	114.972	-0.933305	0.0538869	0.422638	HP4	3L	7975438	7976154	-	717	protein_coding	- && - && -	-
FBgn0016053	10.4687	2.29961	177.629	5.55146	6.38417	91.5902	-3.83892	0.0539972	0.42292	pgc	2R	22330200	22332813	+	1212	protein_coding	- && Q9W265.1 RecName: Full=Probable hydroxyacid-oxoacid transhydrogenase, mitochondrial; Short=HOT; Flags: Precursor && PF00465:Iron-containing alcohol dehydrogenase	-
FBgn0029979	420.843	436.926	1122.54	419.135	428.885	770.838	-0.845918	0.0540154	0.42292	mahe	X	7922158	7931382	-	8365	protein_coding	- && Q5R4I9.1 RecName: Full=Probable ATP-dependent RNA helicase DDX5; AltName: Full=DEAD box protein 5 && PF00271:Helicase conserved C-terminal domain|PF00270:DEAD/DEAH box helicase	DEAD
FBgn0261393	263.812	328.845	493.515	400.63	296.328	447.073	-0.593941	0.0541658	0.423735	alpha-Est5	3R	7533496	7536390	-	2490	protein_coding	- && P16854.1 RecName: Full=Esterase B1; Flags: Precursor && PF00135:Carboxylesterase family	COesterase
FBgn0026263	35.5937	62.0896	110.789	86.9729	48.8416	98.881	-1.02057	0.054241	0.423961	bip1	3L	8054333	8058713	-	1892	protein_coding	- && - && -	-
novel.64	24.0781	10.3483	0.915613	4.62622	17.2132	2.77092	2.63892	0.0542921	0.423998	-	4	1321229	1331880	+	9847	-	- && P21329.1 RecName: Full=RNA-directed DNA polymerase from mobile element jockey; AltName: Full=Reverse transcriptase && -	-
FBgn0010382	14.6562	14.9475	304.899	10.1777	14.8019	157.538	-3.41191	0.0545385	0.425317	CycE	2L	15727581	15748150	-	5047	protein_coding	- && P54733.2 RecName: Full=G1/S-specific cyclin-E; Short=DmCycE && PF00134:Cyclin, N-terminal domain|PF02984:Cyclin, C-terminal domain	Cyclin_C
FBgn0010611	2086.42	2401.95	2744.09	3535.36	2244.18	3139.72	-0.484515	0.0545541	0.425317	Hmgs	2R	16336090	16341242	+	2795	protein_coding	- && P54961.1 RecName: Full=Hydroxymethylglutaryl-CoA synthase 1; Short=HMG-CoA synthase 1; AltName: Full=3-hydroxy-3-methylglutaryl coenzyme A synthase 1 && PF08540:Hydroxymethylglutaryl-coenzyme A synthase C terminal|PF01154:Hydroxymethylglutaryl-coenzyme A synthase N terminal	-
FBgn0039125	161.218	198.917	226.156	375.649	180.068	300.903	-0.741269	0.0546534	0.425445	Ndc1	3R	23924399	23926436	+	1978	protein_coding	- && Q9VCG4.1 RecName: Full=Nucleoporin Ndc1 && PF09531:Nucleoporin protein Ndc1-Nup	-
FBgn0034272	6.28124	5.74903	0	0	6.01514	0	5.15111	0.0546611	1	Ir54a	2R	17744101	17746005	+	1905	protein_coding	- && - && -	-
FBgn0046214	2624.51	2466.34	3126.82	3854.56	2545.42	3490.69	-0.455566	0.0546893	0.425445	vig2	3R	25123373	25125619	+	1773	protein_coding	- && - && PF04774:Hyaluronan / mRNA binding family	-
FBgn0029765	1234.26	2080	1128.04	1056.63	1657.13	1092.33	0.601029	0.05471	0.425445	CG16756	X	5427517	5428217	+	521	protein_coding	- && P48816.1 RecName: Full=Lysozyme; AltName: Full=1,4-beta-N-acetylmuramidase; Flags: Precursor && PF00062:C-type lysozyme/alpha-lactalbumin family	-
FBgn0030000	189.484	200.066	221.578	457.07	194.775	339.324	-0.800891	0.0550812	0.42588	CG2260	X	8119082	8121147	-	2004	protein_coding	- && Q5TJE7.1 RecName: Full=WD repeat-containing protein 46 && PF08149:BING4CT (NUC141) domain	-
FBgn0261933	69.0936	85.0857	138.258	131.385	77.0897	134.821	-0.807578	0.0551074	0.42588	SmD1	3L	12733364	12734611	-	729	protein_coding	- && Q9VU02.1 RecName: Full=Probable small nuclear ribonucleoprotein Sm D1; Short=Sm-D1; AltName: Full=snRNP core protein D1 && PF01423:LSM domain	LSM
FBgn0003268	74.328	74.7374	136.426	123.983	74.5327	130.204	-0.804896	0.0551249	0.42588	rod	3R	31580951	31588244	+	6479	protein_coding	- && - && PF10493:Rough deal protein C-terminal region	-
FBgn0259676	15.7031	10.3483	83.3208	12.9534	13.0257	48.1371	-1.88368	0.055132	0.42588	DNApol-alpha60	3L	20359833	20361585	-	1753	protein_coding	- && Q9VPH2.2 RecName: Full=DNA primase large subunit; AltName: Full=Suppressor of fat facets 240 && PF04104:Eukaryotic and archaeal DNA primase, large subunit	-
FBgn0039816	7.32811	14.9475	0	1.85049	11.1378	0.925244	3.59115	0.0551565	1	CG11317	3R	31090712	31097321	-	1804	protein_coding	- && - && -	-
FBgn0010039	48.1562	45.9923	111.705	74.9447	47.0742	93.3248	-0.987174	0.0551814	0.42588	GstD3	3R	12373068	12373813	+	746	protein_coding	- && Q9VG97.1 RecName: Full=Inactive glutathione S-transferase D3 && PF02798:Glutathione S-transferase, N-terminal domain|PF00043:Glutathione S-transferase, C-terminal domain	GST_N
FBgn0013272	29297.8	27965.6	21947.2	21560	28631.7	21753.6	0.396359	0.0551973	0.42588	Gp150	2R	22317662	22329416	+	4916	protein_coding	- && - && PF13855:Leucine rich repeat	-
FBgn0003301	264.859	290.901	183.123	180.423	277.88	181.773	0.612063	0.0552114	0.42588	rut	X	14787478	14826073	-	9618	protein_coding	- && P32870.2 RecName: Full=Ca(2+)/calmodulin-responsive adenylate cyclase; AltName: Full=ATP pyrophosphate-lyase; AltName: Full=Protein rutabaga && PF16214:Adenylyl cyclase N-terminal extracellular and transmembrane region|PF06327:Domain of Unknown Function (DUF1053)|PF00211:Adenylate and Guanylate cyclase catalytic domain	Guanylate_cyc
FBgn0032509	1581.83	1630.43	1176.56	1199.12	1606.13	1187.84	0.435219	0.0552936	0.42588	CG6523	2L	13366447	13367410	+	837	protein_coding	- && Q28ID3.2 RecName: Full=Glutaredoxin-3; AltName: Full=Thioredoxin-like protein 2 && PF00462:Glutaredoxin|PF00085:Thioredoxin	-
FBgn0045761	330.812	329.994	441.325	522.763	330.403	482.044	-0.544898	0.0553095	0.42588	CHKov1	3R	25323156	25329316	-	1463	protein_coding	- && - && PF02958:Ecdysteroid kinase	-
FBgn0019982	3057.92	4709.61	2668.1	2675.8	3883.76	2671.95	0.539454	0.0553259	0.42588	Gs1l	2L	4455137	4456807	-	1259	protein_coding	- && Q94529.2 RecName: Full=Probable pseudouridine-5'-phosphatase; AltName: Full=GS1-like protein; AltName: Full=Pseudouridine-5'-monophosphatase; Short=5'-PsiMPase && PF13419:Haloacid dehalogenase-like hydrolase	-
FBgn0036740	1225.89	948.59	819.474	694.858	1087.24	757.166	0.522212	0.0553381	0.42588	Vps60	3L	17620123	17621625	-	1100	protein_coding	- && Q9VVI9.2 RecName: Full=Charged multivesicular body protein 5; AltName: Full=Vacuolar protein-sorting-associated protein 60 && PF03357:Snf7	ESCRT-III
FBgn0029887	327.671	315.047	429.422	511.66	321.359	470.541	-0.549989	0.0553399	0.42588	CG3198	X	6668539	6673973	-	4996	protein_coding	- && Q3SX41.1 RecName: Full=Luc7-like protein 3; AltName: Full=Cisplatin resistance-associated-overexpressed protein && PF03194:LUC7 N_terminus	-
FBgn0000316	437.593	530.061	605.22	836.42	483.827	720.82	-0.575447	0.0553714	0.42588	cin	X	255674	258469	+	2110	protein_coding	- && P39205.3 RecName: Full=Molybdenum cofactor synthesis protein cinnamon; Includes: RecName: Full=Molybdopterin adenylyltransferase; Short=MPT adenylyltransferase; AltName: Full=Domain G; Includes: RecName: Full=Molybdopterin molybdenumtransferase; Short=MPT Mo-transferase; AltName: Full=Domain E && PF03454:MoeA C-terminal region (domain IV)|PF00994:Probable molybdopterin binding domain|PF03453…	-
FBgn0000063	6.28124	4.59923	31.1308	14.8039	5.44023	22.9674	-2.0748	0.0554735	0.426075	Mps1	3R	17671271	17673828	+	2141	protein_coding	- && Q4R945.1 RecName: Full=Dual specificity protein kinase TTK && PF00069:Protein kinase domain	Pkinase
FBgn0259215	51.2968	56.3405	26.5528	19.4301	53.8187	22.9914	1.22644	0.0554899	0.426075	Ir93a	3R	20851709	20859945	-	2742	protein_coding	- && - && PF00060:Ligand-gated ion channel	Lig_chan
FBgn0016013	1095.03	960.088	745.309	737.419	1027.56	741.364	0.471129	0.0556001	0.42648	Faa	3L	4072032	4073954	-	1421	protein_coding	- && A5PKH3.1 RecName: Full=Fumarylacetoacetase; Short=FAA; AltName: Full=Beta-diketonase; AltName: Full=Fumarylacetoacetate hydrolase && PF09298:Fumarylacetoacetase N-terminal|PF01557:Fumarylacetoacetate (FAA) hydrolase family	FAA_hydrolase
FBgn0051955	116.203	71.288	206.929	136.936	93.7455	171.932	-0.87327	0.0556359	0.42648	CG31955	2L	3711881	3713105	-	1088	protein_coding	- && - && -	-
FBgn0000927	11.5156	10.3483	314.971	4.62622	10.9319	159.799	-3.86947	0.0557537	0.427002	fs(1)Ya	X	2724286	2726577	+	2235	protein_coding	- && P25028.4 RecName: Full=Mitosis initiation protein fs(1)Ya && -	-
FBgn0053213	4.18749	8.04865	27.4684	20.3554	6.11807	23.9119	-1.9733	0.0558141	0.427002	CG33213	3R	27918182	27919460	-	1279	protein_coding	- && - && -	-
FBgn0032955	4097.46	2912.46	5317.88	4643.8	3504.96	4980.84	-0.506888	0.0558442	0.427002	CG2201	2L	21614232	21624080	-	3885	protein_coding	- && Q9Y259.3 RecName: Full=Choline/ethanolamine kinase; AltName: Full=Choline kinase beta; Short=CK; Short=CKB; AltName: Full=Choline kinase-like protein; AltName: Full=Ethanolamine kinase; Short=EK; AltName: Full=Ethanolamine kinase beta; Short=EKB; AltName: Full=choline/ethanolamine kinase beta; Short=CKEKB && PF01633:Choline/ethanolamine kinase	Choline_kinase
FBgn0261535	176.922	182.819	223.41	370.097	179.87	296.753	-0.722318	0.055946	0.427424	l(2)34Fd	2L	14352594	14355085	-	2321	protein_coding	- && Q6NVM6.1 RecName: Full=Nucleolar protein 10 && PF08159:NUC153 domain	-
FBgn0037100	4.18749	5.74903	16.481	25.9068	4.96826	21.1939	-2.09622	0.0560487	0.427851	CapaR	3L	21558974	21562181	-	1827	protein_coding	- && Q8ITC7.3 RecName: Full=Neuropeptides capa receptor; AltName: Full=Cap2b receptor; AltName: Full=Capability receptor && PF00001:7 transmembrane receptor (rhodopsin family)	7tm_1
FBgn0039052	99.453	16.0973	19.2279	15.7291	57.7751	17.4785	1.72722	0.0562291	0.42887	CG6733	3R	23097728	23099191	+	1291	protein_coding	- && Q6AYS7.1 RecName: Full=Aminoacylase-1A; Short=ACY-1A; AltName: Full=ACY IA; AltName: Full=N-acyl-L-amino-acid amidohydrolase && PF07687:Peptidase dimerisation domain|PF01546:Peptidase family M20/M25/M40	Peptidase_M20
FBgn0039417	105.734	120.73	150.161	241.489	113.232	195.825	-0.790689	0.0564171	0.429946	CG6073	3R	26187018	26188807	-	1564	protein_coding	- && Q9VBG6.2 RecName: Full=Protein HGH1 homolog && PF04063:Domain of unknown function (DUF383)|PF04064:Domain of unknown function (DUF384)	-
FBgn0261565	1528.44	1446.46	1194.87	923.393	1487.45	1059.13	0.489969	0.0566604	0.43144	Lmpt	3L	16865295	16922487	+	12091	protein_coding	- && Q14192.3 RecName: Full=Four and a half LIM domains protein 2; Short=FHL-2; AltName: Full=LIM domain protein DRAL; AltName: Full=Skeletal muscle LIM-protein 3; Short=SLIM-3 && PF00412:LIM domain|PF06297:PET Domain	LIM
FBgn0031945	0	0	4.57806	8.32719	0	6.45263	-4.99867	0.0568295	1	CG7191	2L	7767628	7775033	+	1643	protein_coding	- && - && -	-
FBgn0027929	832.264	616.296	472.456	519.062	724.28	495.759	0.547312	0.0568317	0.431788	NimB1	2L	13963507	13965088	+	1289	protein_coding	- && - && -	-
FBgn0034618	6233.08	4800.44	1935.61	4634.55	5516.76	3285.08	0.74793	0.0568338	0.431788	CG9485	2R	21312399	21319569	+	5491	protein_coding	- && Q2PQH8.1 RecName: Full=Glycogen debranching enzyme; AltName: Full=Glycogen debrancher; Includes: RecName: Full=4-alpha-glucanotransferase; AltName: Full=Oligo-1,4-1,4-glucantransferase; Includes: RecName: Full=Amylo-alpha-1,6-glucosidase; Short=Amylo-1,6-glucosidase; AltName: Full=Dextrin 6-alpha-D-glucosidase && PF06202:Amylo-alpha-1,6-glucosidase|PF14702:central domain of human glycogen de…	-
FBgn0032790	309.875	347.242	447.735	508.884	328.558	478.309	-0.542096	0.0568477	0.431788	CG10194	2L	19488682	19490104	-	1215	protein_coding	- && Q5PQ50.1 RecName: Full=Nucleoside diphosphate-linked moiety X motif 19; Short=Nudix motif 19 && PF00293:NUDIX domain	NUDIX
FBgn0036877	20.9375	9.19845	33.8777	52.7389	15.068	43.3083	-1.51727	0.0569991	0.432165	CG9452	3L	19501010	19503870	-	1652	protein_coding	- && P11117.3 RecName: Full=Lysosomal acid phosphatase; Short=LAP; Flags: Precursor && PF00328:Histidine phosphatase superfamily (branch 2)	Acid_phosphat_A
FBgn0015271	24.0781	27.5954	50.3587	66.6175	25.8367	58.4881	-1.17961	0.0570383	0.432165	Orc5	2L	13829837	13831576	+	1687	protein_coding	- && Q24169.1 RecName: Full=Origin recognition complex subunit 5 && PF14630:Origin recognition complex (ORC) subunit 5 C-terminus|PF13191:AAA ATPase domain	-
FBgn0031869	257.531	352.991	157.485	220.208	305.261	188.847	0.692316	0.0570392	0.432165	CG18304	2L	6932545	6942814	-	6641	protein_coding	- && - && PF11365:Protein of unknown function (DUF3166)	-
FBgn0037553	970.452	1329.18	864.339	717.989	1149.81	791.164	0.539069	0.057293	0.433729	CG18249	3R	8220146	8222188	+	2043	protein_coding	- && - && PF13855:Leucine rich repeat	-
FBgn0036147	1059.44	1152.11	612.545	897.486	1105.77	755.016	0.550447	0.0573892	0.434098	Plod	3L	11198166	11206016	-	2630	protein_coding	- && P24802.1 RecName: Full=Procollagen-lysine,2-oxoglutarate 5-dioxygenase 1; AltName: Full=Lysyl hydroxylase 1; Short=LH1; Flags: Precursor && -	-
FBgn0051665	0	1.14981	20.1435	1.85049	0.574903	10.997	-4.30768	0.057423	1	wry	2L	1836538	1858550	+	5666	protein_coding	- && - && PF00008:EGF-like domain	EGF
FBgn0034943	84.7967	87.3853	123.608	177.647	86.091	150.627	-0.807093	0.0574914	0.434511	Fmo-1	2R	23962956	23964641	+	1454	protein_coding	- && Q8MP06.1 RecName: Full=Senecionine N-oxygenase; Short=SNO; Flags: Precursor && PF00743:Flavin-binding monooxygenase-like	FMO-like
FBgn0037012	164.359	140.276	252.709	225.759	152.318	239.234	-0.650709	0.0578817	0.43693	Rcd2	3L	20527972	20540417	-	2245	protein_coding	- && - && -	-
FBgn0033178	905.545	933.643	416.604	757.775	919.594	587.189	0.64721	0.0579468	0.43693	CG11127	2R	7463504	7464987	+	1484	protein_coding	- && - && -	-
FBgn0025837	13.6094	5.74903	38.4557	25.9068	9.67919	32.1813	-1.72636	0.0579596	0.43693	CG17636	X	124370	126714	-	2036	protein_coding	- && P19440.2 RecName: Full=Gamma-glutamyltranspeptidase 1; Short=GGT 1; AltName: Full=Gamma-glutamyltransferase 1; AltName: Full=Glutathione hydrolase 1; AltName: Full=Leukotriene-C4 hydrolase; AltName: CD_antigen=CD224; Contains: RecName: Full=Gamma-glutamyltranspeptidase 1 heavy chain; Contains: RecName: Full=Gamma-glutamyltranspeptidase 1 light chain; Flags: Precursor && PF01019:Gamma-glutamy…	-
FBgn0034394	6830.85	14808.4	4391.28	8209.69	10819.6	6300.48	0.780085	0.0580025	0.43693	CG15096	2R	18808356	18815019	-	2199	protein_coding	- && Q9V7S5.1 RecName: Full=Putative inorganic phosphate cotransporter && PF07690:Major Facilitator Superfamily	MFS_1
FBgn0262738	190.531	175.92	415.688	212.806	183.226	314.247	-0.778173	0.0581302	0.437531	norpA	X	4322626	4365408	+	8296	protein_coding	- && P13217.4 RecName: Full=1-phosphatidylinositol 4,5-bisphosphate phosphodiesterase; AltName: Full=No receptor potential A protein; AltName: Full=Phosphoinositide phospholipase C && PF09279:Phosphoinositide-specific phospholipase C, efhand-like|PF00388:Phosphatidylinositol-specific phospholipase C, X domain|PF00168:C2 domain|PF00387:Phosphatidylinositol-specific phospholipase C, Y domain|PF0663…	PI-PLC-X
FBgn0266627	0	1.14981	16.481	3.70097	0.574903	10.091	-4.18484	0.0582398	1	asRNA:CR45134	2R	10478043	10478795	+	673	ncRNA	- && - && -	-
FBgn0033557	222.984	159.823	251.794	374.724	191.404	313.259	-0.709743	0.0583108	0.43853	CG12325	2R	10823405	10827644	+	3410	protein_coding	- && Q15269.2 RecName: Full=Periodic tryptophan protein 2 homolog && PF04003:Dip2/Utp12 Family|PF00400:WD domain, G-beta repeat	WD40
FBgn0085427	169.593	187.418	347.017	228.535	178.506	287.776	-0.689374	0.0584445	0.439175	CG34398	2L	8898786	8933594	+	8746	protein_coding	- && - && -	-
FBgn0265272	2.09375	10.3483	0	0	6.221	0	5.19651	0.0585981	1	CG30060	2R	13422978	13423647	-	670	protein_coding	- && O16264.1 RecName: Full=Phosphatidylethanolamine-binding protein homolog F40A3.3 && PF01161:Phosphatidylethanolamine-binding protein	-
FBgn0030040	504.593	830.16	925.685	1110.29	667.377	1017.99	-0.609675	0.0588569	0.44191	CG15347	X	8458494	8460898	-	968	protein_coding	- && - && PF05444:Protein of unknown function (DUF753)	-
FBgn0267541	19.8906	4.59923	0.915613	1.85049	12.2449	1.38305	3.15089	0.0588818	1	lncRNA:CR45881	3L	11666319	11667079	+	761	ncRNA	- && - && -	-
FBgn0035425	355.937	284.002	497.178	445.967	319.97	471.573	-0.558956	0.0589514	0.442256	CG17746	3L	3236805	3239578	-	1851	protein_coding	- && P49596.2 RecName: Full=Probable protein phosphatase 2C T23F11.1; Short=PP2C && PF00481:Protein phosphatase 2C	PP2C
FBgn0026751	171.687	142.576	192.279	344.191	157.132	268.235	-0.770895	0.0591282	0.442787	XRCC1	X	5329876	5332435	+	2319	protein_coding	- && O54935.1 RecName: Full=DNA repair protein XRCC1; AltName: Full=X-ray repair cross-complementing protein 1 && PF12738:twin BRCT domain|PF01834:XRCC1 N terminal domain	-
FBgn0002962	14.6562	13.7977	135.511	2.77573	14.227	69.1432	-2.28089	0.0591408	0.442787	nos	3R	19157238	19160202	+	2349	protein_coding	- && P25724.1 RecName: Full=Protein nanos && PF05741:Nanos RNA binding domain	-
FBgn0030257	165.406	140.276	69.5866	104.553	152.841	87.0696	0.812426	0.0591674	0.442787	SmydA-4	X	11044756	11049540	+	2446	protein_coding	- && - && PF00856:SET domain	SET
FBgn0033635	63.8593	102.333	242.637	97.1506	83.096	169.894	-1.03331	0.0592968	0.443392	Prip	2R	11436243	11442216	+	1609	protein_coding	- && Q23808.1 RecName: Full=Aquaporin AQPcic && PF00230:Major intrinsic protein	-
FBgn0010329	48.1562	17.2471	8.24052	11.1029	32.7016	9.67172	1.76051	0.0593726	0.443597	Tbh	X	7995697	8027394	+	3868	protein_coding	- && Q86B61.1 RecName: Full=Tyramine beta-hydroxylase && PF03712:Copper type II ascorbate-dependent monooxygenase, C-terminal domain|PF01082:Copper type II ascorbate-dependent monooxygenase, N-terminal domain|PF03351:DOMON domain	Cu2_monoox_C
FBgn0052686	51.2968	43.6926	19.2279	20.3554	47.4947	19.7916	1.26353	0.0594362	0.443709	CG32686	X	10371717	10375316	-	3600	protein_coding	- && - && -	-
FBgn0031435	24.0781	8.04865	73.249	26.8321	16.0634	50.0405	-1.63358	0.0596426	0.444887	Elba2	2L	2577687	2579179	+	1493	protein_coding	- && Q9VQD6.1 RecName: Full=Early boundary activity protein 2 && PF10523:BEN domain	-
FBgn0030839	209.375	326.545	155.654	173.021	267.96	164.337	0.704477	0.0597869	0.4456	CG5613	X	17423591	17428735	+	2235	protein_coding	- && Q8BX80.1 RecName: Full=Cytosolic endo-beta-N-acetylglucosaminidase; Short=ENGase && PF03644:Glycosyl hydrolase family 85	-
FBgn0086768	1086.65	1088.87	758.127	831.794	1087.76	794.961	0.452417	0.0598546	0.445741	Pcmt	3R	5552823	5554316	-	998	protein_coding	- && Q27869.2 RecName: Full=Protein-L-isoaspartate(D-aspartate) O-methyltransferase; Short=PIMT; AltName: Full=L-isoaspartyl protein carboxyl methyltransferase; AltName: Full=Protein L-isoaspartyl/D-aspartyl methyltransferase; AltName: Full=Protein-beta-aspartate methyltransferase; AltName: Full=dPIMT && PF01135:Protein-L-isoaspartate(D-aspartate) O-methyltransferase (PCMT)	-
FBgn0019929	1716.87	2646.85	1312.07	1639.53	2181.86	1475.8	0.563905	0.0600099	0.446199	Ser7	X	9865233	9867070	+	1413	protein_coding	- && P13582.3 RecName: Full=Serine protease easter; Flags: Precursor && PF00089:Trypsin	Trypsin
FBgn0036111	1365.12	1329.18	2264.31	1581.24	1347.15	1922.78	-0.513279	0.0600315	0.446199	Aps	3L	10894776	10899123	-	3115	protein_coding	- && O95989.1 RecName: Full=Diphosphoinositol polyphosphate phosphohydrolase 1; Short=DIPP-1; AltName: Full=Diadenosine 5',5'''-P1,P6-hexaphosphate hydrolase 1; AltName: Full=Nucleoside diphosphate-linked moiety X motif 3; Short=Nudix motif 3 && PF00293:NUDIX domain	NUDIX
FBgn0041094	616.608	396.683	1548.3	433.014	506.646	990.658	-0.967192	0.0600966	0.446199	scyl	3L	11252307	11256172	+	3124	protein_coding	- && Q9VTH4.1 RecName: Full=Protein scylla; AltName: Full=Protein regulated in development and DNA damage response 2; Short=REDD-2 && PF07809:RTP801 C-terminal region	-
FBgn0030608	14637.4	18109.5	23805	20740.3	16373.4	22272.6	-0.443936	0.0601112	0.446199	Lsd-2	X	15069127	15076220	-	4598	protein_coding	- && Q9VXY7.1 RecName: Full=Lipid storage droplets surface-binding protein 2; Short=Lsd2 && PF03036:Perilipin family	Perilipin
FBgn0005411	1297.08	1055.52	1303.83	2325.14	1176.3	1814.48	-0.625164	0.0601904	0.446425	U2af50	X	16356696	16359039	-	1646	protein_coding	- && Q24562.1 RecName: Full=Splicing factor U2AF 50 kDa subunit; AltName: Full=U2 auxiliary factor 50 kDa subunit; AltName: Full=U2 snRNP auxiliary factor large subunit && PF14259:RNA recognition motif (a.k.a. RRM, RBD, or RNP domain)|PF00076:RNA recognition motif. (a.k.a. RRM, RBD, or RNP domain)	RRM_1
FBgn0051145	2530.29	2671	2043.65	1835.68	2600.65	1939.67	0.423023	0.0604896	0.448169	CG31145	3R	23605751	23669659	-	4945	protein_coding	- && A4VCL2.1 RecName: Full=Extracellular serine/threonine protein CG31145; AltName: Full=Golgi casein kinase; AltName: Full=Golgi-enriched fraction casein kinase; Short=GEF-CK && PF06702:Golgi casein kinase, C-terminal, Fam20	DUF1193
FBgn0033449	29.3125	28.7452	61.3461	62.9166	29.0288	62.1313	-1.09768	0.0605236	0.448169	CG1663	2R	9836985	9838481	+	1439	protein_coding	- && - && -	-
FBgn0051548	3166.79	3677.08	2647.04	2431.54	3421.94	2539.29	0.43032	0.0605927	0.448317	CG31548	3R	5635901	5636852	-	952	protein_coding	- && Q5FPE5.1 RecName: Full=Glucose 1-dehydrogenase && PF00106:short chain dehydrogenase	adh_short
FBgn0024238	541.234	501.316	784.68	680.979	521.275	732.83	-0.491292	0.060729	0.448963	Fim	X	17285704	17301929	-	4258	protein_coding	- && Q63598.2 RecName: Full=Plastin-3; AltName: Full=T-plastin && PF00307:Calponin homology (CH) domain	CH
FBgn0031702	1340	2298.46	1062.11	1323.1	1819.23	1192.6	0.609012	0.0608127	0.449218	fusl	2L	5330470	5338073	-	3231	protein_coding	- && - && PF15993:Fuseless	-
FBgn0263396	2190.06	2259.37	3697.24	2591.61	2224.71	3144.43	-0.499204	0.0608852	0.449271	sqd	3R	13634862	13646304	-	7745	protein_coding	- && Q08473.3 RecName: Full=RNA-binding protein squid; AltName: Full=Heterogeneous nuclear ribonucleoprotein 40; Short=HNRNP 40 && PF00076:RNA recognition motif. (a.k.a. RRM, RBD, or RNP domain)	RRM_1
FBgn0010287	31.4062	29.895	39.3714	109.179	30.6506	74.2751	-1.2765	0.0609254	0.449271	Trf	2L	8072895	8073948	+	983	protein_coding	- && Q27896.1 RecName: Full=TBP-related factor && PF00352:Transcription factor TFIID (or TATA-binding protein, TBP)	-
FBgn0034509	251.25	522.012	255.456	191.525	386.631	223.491	0.789895	0.0609687	0.449271	Obp57c	2R	20503584	20504202	+	557	protein_coding	- && Q9V931.1 RecName: Full=General odorant-binding protein 57c; Flags: Precursor && PF01395:PBP/GOBP family	-
FBgn0034527	282.656	341.493	358.92	651.372	312.074	505.146	-0.695085	0.0610809	0.449271	CG9945	2R	20618503	20621081	+	2075	protein_coding	- && Q5R7H5.2 RecName: Full=DDB1- and CUL4-associated factor 11; AltName: Full=WD repeat-containing protein 23 && -	-
FBgn0015320	407.234	449.574	669.313	556.997	428.404	613.155	-0.517538	0.0611145	0.449271	Ubc2	2L	10765010	10768006	-	2252	protein_coding	- && P52485.1 RecName: Full=Ubiquitin-conjugating enzyme E2-24 kDa; AltName: Full=E2 ubiquitin-conjugating enzyme 2; AltName: Full=Ubiquitin carrier protein; AltName: Full=Ubiquitin-protein ligase && PF00179:Ubiquitin-conjugating enzyme	UQ_con
FBgn0033540	283.703	296.65	345.186	565.324	290.176	455.255	-0.649777	0.0611737	0.449271	Elp2	2R	10645735	10648634	+	2538	protein_coding	- && Q7K4B3.1 RecName: Full=Probable elongator complex protein 2; Short=ELP2; AltName: Full=Stat3-interacting protein homolog && -	-
FBgn0024732	198.906	236.86	309.477	346.041	217.883	327.759	-0.589666	0.0612229	0.449271	Drep1	2R	12044612	12050172	+	2153	protein_coding	- && - && PF02017:CIDE-N domain	-
FBgn0026206	190.531	202.366	481.612	211.881	196.448	346.747	-0.819939	0.0613273	0.449271	mei-P26	X	9163255	9189309	+	23228	protein_coding	- && Q8MQJ9.2 RecName: Full=Brain tumor protein && PF00643:B-box zinc finger|PF01436:NHL repeat	zf-B_box
FBgn0030610	244.968	309.298	362.583	480.201	277.133	421.392	-0.605146	0.0613327	0.449271	CG9065	X	15084029	15084699	-	521	protein_coding	- && Q6J3Q7.3 RecName: Full=Cytochrome c oxidase copper chaperone && -	-
FBgn0052039	16.75	54.0409	90.6457	76.7952	35.3954	83.7204	-1.24702	0.0613421	0.449271	CG32039	3L	9358999	9359996	+	881	protein_coding	- && - && -	-
FBgn0261108	1633.12	1828.19	1384.41	1117.69	1730.66	1251.05	0.46808	0.0613603	0.449271	Atg13	3R	8349815	8352817	+	3003	protein_coding	- && Q9VHR6.1 RecName: Full=Autophagy-related protein 13 homolog && PF10033:Autophagy-related protein 13	-
FBgn0031600	198.906	196.617	292.996	298.854	197.761	295.925	-0.58142	0.0614303	0.449424	CG3652	2L	4392770	4393876	-	867	protein_coding	- && Q28CH8.1 RecName: Full=Protein YIPF6; AltName: Full=YIP1 family member 6 && PF04893:Yip1 domain	-
FBgn0032881	1037.45	1022.18	713.262	790.158	1029.81	751.71	0.454171	0.0616047	0.449895	Amacr	2L	20750934	20752341	-	1335	protein_coding	- && Q9UHK6.2 RecName: Full=Alpha-methylacyl-CoA racemase; AltName: Full=2-methylacyl-CoA racemase && PF02515:CoA-transferase family III	CoA_transf_3
FBgn0040075	179.015	202.366	265.528	316.433	190.691	290.981	-0.610101	0.0616098	0.449895	rept	3L	19255340	19257111	+	1772	protein_coding	- && Q9V3K3.1 RecName: Full=RuvB-like helicase 2; AltName: Full=Dreptin; Short=Drep; AltName: Full=Reptin && PF06068:TIP49 C-terminus	-
FBgn0262481	214.609	216.164	130.933	144.338	215.386	137.635	0.646096	0.0616422	0.449895	CG43071	2R	18864621	18865218	-	514	protein_coding	- && - && -	-
FBgn0040256	368.499	714.03	896.385	824.392	541.265	860.389	-0.669365	0.0617678	0.450443	Ugt35C1	3R	11126597	11128328	-	1671	protein_coding	- && Q6K1J1.1 RecName: Full=UDP-glucuronosyltransferase 2B31; Short=UDPGT 2B31; Flags: Precursor && PF00201:UDP-glucoronosyl and UDP-glucosyl transferase	UDPGT
FBgn0026597	316.156	310.448	498.093	413.584	313.302	455.839	-0.540954	0.0618158	0.450443	Axn	3R	30022842	30035311	+	4985	protein_coding	- && Q9V407.1 RecName: Full=Axin; AltName: Full=Axis inhibition protein; AltName: Full=d-Axin; Short=dAxin && PF00778:DIX domain|PF08833:Axin beta-catenin binding domain|PF00615:Regulator of G protein signaling domain	DIX
FBgn0033740	10.4687	10.3483	49.4431	18.5049	10.4085	33.974	-1.70683	0.0618752	0.450517	dgt5	2R	12465678	12471775	-	2300	protein_coding	- && - && -	-
FBgn0039828	329.765	369.088	413.857	667.101	349.427	540.479	-0.62941	0.0619905	0.450616	CG1542	3R	31213458	31214784	+	1207	protein_coding	- && Q9V9Z9.1 RecName: Full=Probable rRNA-processing protein EBP2 homolog && PF05890:Eukaryotic rRNA processing protein EBP2	-
FBgn0032105	11.5156	16.0973	108.042	6.47671	13.8064	57.2595	-2.05382	0.0620414	0.450616	borr	2L	9251472	9253118	-	1298	protein_coding	- && Q9VLD6.1 RecName: Full=Borealin; AltName: Full=Aurora borealis protein; AltName: Full=Borealin-related && PF10512:Cell division cycle-associated protein 8	-
FBgn0035204	876.233	1331.48	698.613	797.56	1103.85	748.086	0.560967	0.0620687	0.450616	CG2277	3L	1304850	1307418	-	2569	protein_coding	- && Q5TFE4.1 RecName: Full=5'-nucleotidase domain-containing protein 1 && PF05761:5' nucleotidase family	-
FBgn0051719	353.843	240.31	208.76	160.992	297.076	184.876	0.684945	0.0620859	0.450616	RluA-1	2L	10463340	10474349	-	3207	protein_coding	- && Q149F1.2 RecName: Full=RNA pseudouridylate synthase domain-containing protein 2 && PF00849:RNA pseudouridylate synthase	-
FBgn0037520	20.9375	11.4981	4.57806	0.925244	16.2178	2.75165	2.55931	0.0621409	0.450657	CG18268	3R	7802831	7804432	-	1432	protein_coding	- && - && PF00339:Arrestin (or S-antigen), N-terminal domain	-
FBgn0032726	3112.35	4187.6	2944.61	2096.6	3649.97	2520.61	0.534027	0.0623114	0.451535	CG10621	2L	18952206	18954431	-	1519	protein_coding	- && Q8LAX0.2 RecName: Full=Homocysteine S-methyltransferase 3; AltName: Full=S-methylmethionine:homocysteine methyltransferase 3; Short=AtHMT-3; Short=SMM:Hcy S-methyltransferase 3 && PF02574:Homocysteine S-methyltransferase	-
FBgn0262733	385.249	259.856	740.731	359.92	322.553	550.325	-0.770265	0.0624255	0.452004	Src64B	3L	4592447	4626196	-	5200	protein_coding	- && P00528.3 RecName: Full=Tyrosine-protein kinase Src64B; Short=Dsrc64 && PF07714:Protein tyrosine kinase|PF00018:SH3 domain|PF00017:SH2 domain	Pkinase_Tyr
FBgn0024293	25496.6	32968.4	21747.6	21348.1	29232.5	21547.9	0.440014	0.0629455	0.455408	Spn43Ab	2R	7151662	7153642	-	1329	protein_coding	- && Q1JPB0.2 RecName: Full=Leukocyte elastase inhibitor; Short=LEI; AltName: Full=Serpin B1 && PF00079:Serpin (serine protease inhibitor)	Serpin
FBgn0030271	62.8124	133.378	47.6119	47.1874	98.095	47.3996	1.04746	0.0630311	0.455668	CG15202	X	11142541	11143755	+	863	protein_coding	- && - && PF15430:Single domain von Willebrand factor type C	-
FBgn0086451	655.343	490.967	590.57	1343.45	573.155	967.012	-0.75434	0.0631516	0.456066	l(2)k09022	2L	6854142	6860849	+	6472	protein_coding	- && Q9VM75.2 RecName: Full=HEAT repeat-containing protein 1 homolog && PF12397:U3 small nucleolar RNA-associated protein 10|PF08146:BP28CT (NUC211) domain	-
FBgn0010225	25894.4	29208.5	20499.7	21322.2	27551.5	20910.9	0.397864	0.063186	0.456066	Gel	3R	4235217	4241057	+	3376	protein_coding	- && Q07171.2 RecName: Full=Gelsolin; Flags: Precursor && PF00626:Gelsolin repeat	-
FBgn0030817	52.3437	104.632	336.03	59.2156	78.488	197.623	-1.33356	0.0633615	0.456506	CG4991	X	17091854	17104562	+	2499	protein_coding	- && Q4KL91.1 RecName: Full=Proton-coupled amino acid transporter 4; Short=Proton/amino acid transporter 4; AltName: Full=Solute carrier family 36 member 4 [Xenopus laevis] && PF01490:Transmembrane amino acid transporter protein	Aa_trans
FBgn0050104	482.609	365.638	275.599	295.153	424.124	285.376	0.57217	0.0633914	0.456506	NT5E-2	2R	17485002	17493169	+	2062	protein_coding	- && Q9XZ43.1 RecName: Full=Protein 5NUC; Includes: RecName: Full=UDP-sugar hydrolase; AltName: Full=UDP-sugar diphosphatase; AltName: Full=UDP-sugar pyrophosphatase; Includes: RecName: Full=5'-nucleotidase; Short=5'-NT; Flags: Precursor && PF02872:5'-nucleotidase, C-terminal domain|PF00149:Calcineurin-like phosphoesterase	Metallophos
FBgn0034606	502.499	389.784	321.38	281.274	446.142	301.327	0.56661	0.0633967	0.456506	ASPP	2R	21217856	21251150	-	5044	protein_coding	- && Q62415.2 RecName: Full=Apoptosis-stimulating of p53 protein 1; AltName: Full=Protein phosphatase 1 regulatory subunit 13B && PF00018:SH3 domain|PF13637:Ankyrin repeats (many copies)	SH3_1
FBgn0263855	54.4374	42.5428	126.355	69.3933	48.4901	97.8739	-1.01213	0.0635811	0.457174	BubR1	2R	5969099	5974385	-	4626	protein_coding	- && Q54CV5.1 RecName: Full=Probable inactive serine/threonine-protein kinase bub1 && PF00069:Protein kinase domain|PF08311:Mad3/BUB1 homology region 1	Pkinase
FBgn0250848	3549.95	4826.89	2982.15	3065.33	4188.42	3023.74	0.469983	0.0636308	0.457174	26-29-p	3L	13994231	13996571	+	1872	protein_coding	- && Q54TR1.1 RecName: Full=Counting factor associated protein D; Flags: Precursor && PF00112:Papain family cysteine protease|PF08246:Cathepsin propeptide inhibitor domain (I29)	Peptidase_C1
FBgn0000147	10.4687	5.74903	87.8988	1.85049	8.10888	44.8747	-2.46558	0.0636394	0.457174	aurA	3R	11963124	11964826	+	1577	protein_coding	- && D7UQM5.1 RecName: Full=Aurora kinase; AltName: Full=ApAurora && PF00069:Protein kinase domain	Pkinase
FBgn0032987	28153.6	29337.3	22943.4	20882.7	28745.4	21913.1	0.391537	0.0637548	0.457511	RpL21	2L	22247111	22247875	-	704	protein_coding	- && P46778.2 RecName: Full=60S ribosomal protein L21 && PF01157:Ribosomal protein L21e	-
FBgn0050054	10.4687	28.7452	5.49368	2.77573	19.6069	4.1347	2.24194	0.0637864	0.457511	CG30054	2R	12623726	12625352	+	1120	protein_coding	- && P23625.2 RecName: Full=G protein alpha q subunit; AltName: Full=Guanine nucleotide-binding protein G(q) subunit alpha; AltName: Full=Guanine nucleotide-binding protein alpha-q; AltName: Full=dGQalpha && PF00503:G-protein alpha subunit	G-alpha
FBgn0052344	708.733	505.915	611.629	1473.91	607.324	1042.77	-0.779614	0.0639006	0.457971	CG32344	3L	321233	324720	-	2694	protein_coding	- && Q8K4L0.1 RecName: Full=ATP-dependent RNA helicase DDX54; AltName: Full=DEAD box protein 54 && PF08147:DBP10CT (NUC160) domain|PF00270:DEAD/DEAH box helicase|PF00271:Helicase conserved C-terminal domain	DEAD
FBgn0033443	76.4218	123.029	26.5528	64.7671	99.7255	45.6599	1.12638	0.0640075	0.458233	CG1698	2R	9793326	9798006	+	4106	protein_coding	- && B4GVM9.1 RecName: Full=Sodium-dependent nutrient amino acid transporter 1 && PF00209:Sodium:neurotransmitter symporter family	SNF
FBgn0050010	313.015	160.973	141.004	132.31	236.994	136.657	0.795417	0.0640374	0.458233	CG30010	2R	9863564	9864576	+	960	protein_coding	- && Q8MKL1.1 RecName: Full=UPF0598 protein CG30010 && PF14956:Domain of unknown function (DUF4505)	-
FBgn0036764	37.6874	19.5467	75.9959	54.5894	28.6171	65.2926	-1.18623	0.0641195	0.458462	CG5535	3L	17852624	17856794	-	2296	protein_coding	- && B3TP03.1 RecName: Full=Cationic amino acid transporter 2; Short=CAT-2; Short=CAT2; Short=cCAT-2; AltName: Full=Low affinity cationic amino acid transporter 2; AltName: Full=Solute carrier family 7 member 2 && PF13520:Amino acid permease|PF13906:C-terminus of AA_permease	-
FBgn0002707	58.6249	90.8347	138.258	127.684	74.7298	132.971	-0.83349	0.0643165	0.459179	mei-9	X	4314230	4318801	-	3606	protein_coding	- && Q24087.2 RecName: Full=DNA repair endonuclease XPF; AltName: Full=Protein meiotic 9 && PF02732:ERCC4 domain	-
FBgn0037906	2003.72	2240.97	1549.22	1618.25	2122.34	1583.73	0.422254	0.0643202	0.459179	PGRP-LB	3R	11452849	11460552	-	1775	protein_coding	- && Q8INK6.1 RecName: Full=Peptidoglycan-recognition protein LB; Flags: Precursor && PF01510:N-acetylmuramoyl-L-alanine amidase	-
FBgn0265938	0	2.29961	11.903	11.1029	1.14981	11.5029	-3.35545	0.0643968	1	lncRNA:CR44725	2R	21531595	21532195	-	601	ncRNA	- && - && -	-
FBgn0031070	16.75	10.3483	67.7554	18.5049	13.5491	43.1301	-1.66768	0.0645094	0.46017	CG12702	X	19759173	19764874	-	3517	protein_coding	- && - && -	-
FBgn0035020	1316.97	1476.35	1022.74	1042.75	1396.66	1032.74	0.435385	0.0649547	0.462985	CG13585	2R	24531594	24533391	+	1043	protein_coding	- && - && PF11027:Protein of unknown function (DUF2615)	-
FBgn0037222	77.4686	105.782	168.473	142.488	91.6254	155.48	-0.764421	0.0653689	0.465367	CG14642	3R	4241045	4242717	-	1414	protein_coding	- && A8JUP7.1 RecName: Full=Serine protease Hayan; Flags: Precursor && PF00089:Trypsin	Trypsin
FBgn0026666	206.234	201.216	262.781	364.546	203.725	313.663	-0.622447	0.0654249	0.465367	MagR	X	15734270	15735780	+	783	protein_coding	- && Q8T3X9.1 RecName: Full=Iron-sulfur cluster assembly 1 homolog, mitochondrial; AltName: Full=Lethal (1) G0136; AltName: Full=Putative magnetoreceptor subunit MagR; Flags: Precursor && PF01521:Iron-sulphur cluster biosynthesis	-
FBgn0051373	2040.36	2375.5	1828.48	1260.18	2207.93	1544.33	0.515622	0.0654617	0.465367	CG31373	3R	10708487	10709364	-	721	protein_coding	- && Q9HBH1.1 RecName: Full=Peptide deformylase, mitochondrial; AltName: Full=Polypeptide deformylase; Flags: Precursor && PF01327:Polypeptide deformylase	Pep_deformylase
FBgn0024986	397.812	436.926	626.279	553.296	417.369	589.787	-0.499125	0.0654923	0.465367	CG3719	X	1378885	1380480	-	831	protein_coding	- && Q99757.2 RecName: Full=Thioredoxin, mitochondrial; Short=MTRX; Short=Mt-Trx; AltName: Full=Thioredoxin-2; Flags: Precursor && PF00085:Thioredoxin	-
FBgn0032346	94.2186	83.9359	109.874	217.432	89.0772	163.653	-0.876951	0.0656078	0.465825	Csl4	2L	11122574	11123567	-	940	protein_coding	- && Q9Y3B2.1 RecName: Full=Exosome complex component CSL4; AltName: Full=Exosome component 1 && PF14382:Exosome complex exonuclease RRP4 N-terminal region|PF10447:Exosome component EXOSC1/CSL4	-
FBgn0265574	313.015	248.358	343.355	532.94	280.687	438.148	-0.641884	0.0657685	0.466482	Cdc5	3L	357851	361383	-	3346	protein_coding	- && Q99459.2 RecName: Full=Cell division cycle 5-like protein; Short=Cdc5-like protein; AltName: Full=Pombe cdc5-related protein && PF12678:RING-H2 zinc finger|PF11831:pre-mRNA splicing factor component|PF13921:Myb-like DNA-binding domain	-
FBgn0036565	31.4062	21.8463	91.5613	37.935	26.6263	64.7481	-1.28016	0.0658022	0.466482	CG5235	3L	16087627	16090392	-	2711	protein_coding	- && Q9VUY0.2 RecName: Full=MOXD1 homolog 1; Flags: Precursor && PF03351:DOMON domain|PF03712:Copper type II ascorbate-dependent monooxygenase, C-terminal domain|PF01082:Copper type II ascorbate-dependent monooxygenase, N-terminal domain	Cu2_monoox_C
FBgn0032536	39.7812	43.6926	82.4052	78.6457	41.7369	80.5254	-0.948754	0.0658782	0.466574	Ance-3	2L	13914725	13956188	+	3426	protein_coding	- && Q10714.3 RecName: Full=Angiotensin-converting enzyme; AltName: Full=Dipeptidyl carboxypeptidase I; AltName: Full=Kininase II; Flags: Precursor && PF01401:Angiotensin-converting enzyme	Peptidase_M2
FBgn0035231	622.89	310.448	289.334	278.498	466.669	283.916	0.717659	0.0659172	0.466574	Pcyt2	3L	1553493	1555315	+	1697	protein_coding	- && P49583.2 RecName: Full=Putative choline-phosphate cytidylyltransferase; AltName: Full=CTP:phosphocholine cytidylyltransferase; Short=CCT; Short=CT; AltName: Full=Phosphorylcholine transferase && PF01467:Cytidylyltransferase-like	CTP_transf_2
FBgn0033945	109.922	131.078	119.03	1293.49	120.5	706.26	-2.55122	0.0660866	0.467411	CG12868	2R	14604549	14605297	-	688	protein_coding	- && - && -	-
FBgn0261801	1.04687	11.4981	0	0	6.27247	0	5.20797	0.0661997	1	CG42747	3L	6400590	6485964	+	2857	protein_coding	- && - && -	-
FBgn0004811	228.218	297.8	404.701	376.574	263.009	390.638	-0.57152	0.066203	0.467872	fs(2)ltoPP43	2L	19792773	19795851	-	2435	protein_coding	- && - && PF08574:Protein of unknown function (DUF1762)	-
FBgn0038530	7.32811	1.14981	43.9494	5.55146	4.23896	24.7504	-2.53364	0.0663285	0.468139	AttD	3R	17625268	17626086	+	742	protein_coding	- && - && PF03768:Attacin, N-terminal region|PF03769:Attacin, C-terminal region	-
FBgn0033379	533.905	490.967	590.57	953.926	512.436	772.248	-0.591529	0.0663431	0.468139	Mys45A	2R	9111505	9113951	-	2385	protein_coding	- && Q7KKH3.1 RecName: Full=Protein SDA1 homolog; AltName: Full=Mystery protein 45A && PF05285:SDA1|PF08158:NUC130/3NT domain	-
FBgn0039875	1402.81	1562.59	1038.31	1151	1482.7	1094.65	0.437663	0.0664542	0.468561	sip3	3R	31772219	31775163	+	2660	protein_coding	- && Q95SP2.1 RecName: Full=E3 ubiquitin-protein ligase HRD1; AltName: Full=Septin-interacting protein 3; AltName: Full=Synoviolin; Flags: Precursor && PF13639:Ring finger domain	-
FBgn0262782	50564	64906.6	43179.4	42507.5	57735.3	42843.5	0.430371	0.0665485	0.468864	Mdh1	2L	10393774	10396332	-	1289	protein_coding	- && Q5ZME2.1 RecName: Full=Malate dehydrogenase, cytoplasmic; AltName: Full=Cytosolic malate dehydrogenase && PF00056:lactate/malate dehydrogenase, NAD binding domain|PF02866:lactate/malate dehydrogenase, alpha/beta C-terminal domain	-
FBgn0040602	2.09375	0	95.2237	0.925244	1.04687	48.0745	-5.50667	0.0666746	0.469095	CG14545	3R	25850410	25851291	-	813	protein_coding	- && - && -	-
FBgn0038269	297.312	288.601	371.739	495.005	292.957	433.372	-0.564787	0.0666984	0.469095	Rrp6	3R	14882498	14886246	-	3233	protein_coding	- && P56960.2 RecName: Full=Exosome component 10; AltName: Full=Autoantigen PM/Scl 2 homolog; AltName: Full=Polymyositis/scleroderma autoantigen 2 homolog && PF01612:3'-5' exonuclease|PF00570:HRDC domain|PF08066:PMC2NT (NUC016) domain	3_5_exonuc
FBgn0034113	187.39	167.872	196.857	418.21	177.631	307.533	-0.791516	0.0667352	0.469095	CG8060	2R	16316313	16320732	-	4017	protein_coding	- && Q6NRS1.1 RecName: Full=Inhibitor of Bruton tyrosine kinase; Short=IBtk && PF00415:Regulator of chromosome condensation (RCC1) repeat|PF13637:Ankyrin repeats (many copies)|PF00651:BTB/POZ domain	BTB
FBgn0034021	162.265	209.265	629.942	146.188	185.765	388.065	-1.0632	0.0668574	0.469594	CG8180	2R	15472175	15482834	-	2614	protein_coding	- && - && -	-
FBgn0035986	30.3593	33.3444	91.5613	48.1127	31.8519	69.837	-1.13335	0.0669754	0.470061	CG4022	3L	9406179	9410832	-	4406	protein_coding	- && - && -	-
FBgn0003278	199.953	147.175	206.929	383.051	173.564	294.99	-0.764349	0.0670299	0.470083	RpI135	2L	404285	407969	+	3564	protein_coding	- && P20028.2 RecName: Full=DNA-directed RNA polymerase I subunit RPA2; Short=RNA polymerase I subunit 2; AltName: Full=RPA135 && PF04561:RNA polymerase Rpb2, domain 2|PF00562:RNA polymerase Rpb2, domain 6|PF04560:RNA polymerase Rpb2, domain 7|PF04563:RNA polymerase beta subunit|PF06883:RNA polymerase I, Rpa2 specific domain|PF04565:RNA polymerase Rpb2, domain 3	RNA_pol_Rpb2_6
FBgn0003360	39651.4	51464.2	35635.7	31270.5	45557.8	33453.1	0.445551	0.0670972	0.470194	sesB	X	10780893	10786958	-	2006	protein_coding	- && Q26365.4 RecName: Full=ADP,ATP carrier protein; AltName: Full=ADP/ATP translocase; AltName: Full=Adenine nucleotide translocator; Short=ANT; AltName: Full=Stress-sensitive protein B && PF00153:Mitochondrial carrier protein	Mito_carr
FBgn0259982	12.5625	12.6479	32.9621	36.0845	12.6052	34.5233	-1.45358	0.0674123	0.471402	Uxt	2L	15256581	15257642	+	1011	protein_coding	- && - && PF02996:Prefoldin subunit	-
FBgn0039481	213.562	155.224	119.945	104.553	184.393	112.249	0.716901	0.0674291	0.471402	Cpr97Eb	3R	27089704	27091130	-	1054	protein_coding	- && - && PF00379:Insect cuticle protein	Chitin_bind_4
FBgn0040207	247.062	227.662	338.777	355.294	237.362	347.035	-0.547693	0.067434	0.471402	kat80	X	16267007	16276180	-	3350	protein_coding	- && O61585.1 RecName: Full=Katanin p80 WD40 repeat-containing subunit B1; Short=Katanin p80 subunit B1; AltName: Full=p80 katanin && PF13925:con80 domain of Katanin|PF00400:WD domain, G-beta repeat	WD40
FBgn0266670	1268.81	1034.83	608.883	946.524	1151.82	777.703	0.566805	0.0674757	0.471402	Sec5	2L	3457302	3460367	+	2885	protein_coding	- && Q9VQQ9.1 RecName: Full=Exocyst complex component 2; AltName: Full=Exocyst complex component Sec5 && PF15469:Exocyst complex component Sec5	-
FBgn0032219	571.593	1079.67	446.819	589.38	825.631	518.1	0.671867	0.0676681	0.472335	CG4995	2L	10322476	10324990	+	1507	protein_coding	- && Q08DK7.1 RecName: Full=Mitochondrial basic amino acids transporter; AltName: Full=Carnitine/acylcarnitine translocase-like; Short=CACT-like; AltName: Full=Mitochondrial carnitine/acylcarnitine carrier protein CACL; AltName: Full=Mitochondrial ornithine transporter 3; AltName: Full=Solute carrier family 25 member 29 && PF00153:Mitochondrial carrier protein	Mito_carr
FBgn0036146	72.2343	44.8425	28.384	24.0563	58.5384	26.2202	1.16019	0.0677125	0.472335	CG14141	3L	11201351	11202158	+	755	protein_coding	- && Q5WRU0.1 RecName: Full=Immunoglobulin domain-containing protein oig-4; Flags: Precursor && PF07679:Immunoglobulin I-set domain	I-set
FBgn0023526	160.172	140.276	392.798	157.291	150.224	275.045	-0.872358	0.0678332	0.472816	CG2865	X	2278031	2293411	-	5574	protein_coding	- && - && PF06031:SERTA motif	-
FBgn0263199	32548.3	42155.4	27967.4	27421.4	37351.8	27694.4	0.431574	0.0683023	0.475723	Galk	3L	8982212	8986091	-	3144	protein_coding	- && Q5XIG6.1 RecName: Full=N-acetylgalactosamine kinase; AltName: Full=GalNAc kinase; AltName: Full=Galactokinase 2 && PF00288:GHMP kinases N terminal domain|PF08544:GHMP kinases C terminal|PF10509:Galactokinase galactose-binding signature	GHMP_kinases
FBgn0052069	104.687	81.6363	52.1899	48.1127	93.1618	50.1513	0.894277	0.0687374	0.47839	CG32069	3L	11062131	11062614	-	356	protein_coding	- && Q3B8G7.1 RecName: Full=Immediate early response 3-interacting protein 1 [Xenopus laevis] && -	-
FBgn0037447	961.03	927.894	729.743	654.147	944.462	691.945	0.448863	0.0688929	0.479107	Neurochondrin	3R	6468437	6471016	+	2580	protein_coding	- && Q9VI25.1 RecName: Full=Neurochondrin homolog; AltName: Full=dNeurochondrin && PF05536:Neurochondrin	-
FBgn0021768	330.812	326.545	415.688	541.268	328.679	478.478	-0.541696	0.0691359	0.479874	nudC	3L	16804994	16819532	+	1622	protein_coding	- && Q5ZIN1.1 RecName: Full=Nuclear migration protein nudC; AltName: Full=Nuclear distribution protein C homolog && PF04969:CS domain|PF14050:N-terminal conserved domain of Nudc.	-
FBgn0052428	623.937	607.098	434.916	452.444	615.517	443.68	0.472339	0.069143	0.479874	CG32428	3L	20469674	20473723	-	2299	protein_coding	- && - && -	-
FBgn0038552	3627.42	2905.56	1909.05	2695.23	3266.49	2302.14	0.504844	0.0691607	0.479874	Alg1	3R	17809401	17811134	-	1615	protein_coding	- && Q921Q3.3 RecName: Full=Chitobiosyldiphosphodolichol beta-mannosyltransferase; AltName: Full=Asparagine-linked glycosylation protein 1 homolog; AltName: Full=Beta-1,4-mannosyltransferase; AltName: Full=GDP-Man:GlcNAc2-PP-dolichol mannosyltransferase; AltName: Full=GDP-mannose-dolichol diphosphochitobiose mannosyltransferase && PF13692:Glycosyl transferases group 1|PF13579:Glycosyl transferase…	-
FBgn0031972	399.906	416.23	497.178	693.007	408.068	595.093	-0.544344	0.0693832	0.48073	Wwox	2L	7999670	8004286	-	1502	protein_coding	- && Q9VLU5.1 RecName: Full=WW domain-containing oxidoreductase && PF00106:short chain dehydrogenase|PF00397:WW domain	adh_short
FBgn0051935	756.889	622.045	401.038	545.894	689.467	473.466	0.542519	0.0693891	0.48073	CG31935	2L	1594822	1611157	-	3058	protein_coding	- && Q9VQ26.2 RecName: Full=Rab3 GTPase-activating protein catalytic subunit && PF13890:Rab3 GTPase-activating protein catalytic subunit	-
FBgn0037516	5.23437	5.74903	0	0	5.4917	0	5.01932	0.0696966	1	CG11286	3R	7770860	7771756	-	838	protein_coding	- && - && -	-
FBgn0263979	437.593	342.642	554.861	562.548	390.118	558.705	-0.517592	0.0697405	0.482798	Caf1-55	3R	15225576	15227564	+	1828	protein_coding	- && Q24572.1 RecName: Full=Probable histone-binding protein Caf1; AltName: Full=Chromatin assembly factor 1 p55 subunit; Short=CAF-1 p55 subunit; AltName: Full=Nucleosome-remodeling factor 55 kDa subunit; Short=NURF-55; AltName: Full=dCAF-1 && PF00400:WD domain, G-beta repeat|PF12265:Histone-binding protein RBBP4 or subunit C of CAF1 complex	WD40
FBgn0033498	23.0312	9.19845	0.915613	4.62622	16.1148	2.77092	2.54393	0.0698053	0.482882	CG12209	2R	10246071	10247560	-	1268	protein_coding	- && - && -	-
FBgn0038627	181.109	208.115	122.692	124.908	194.612	123.8	0.652166	0.0701637	0.484994	CG7694	3R	18573091	18590726	+	1207	protein_coding	- && Q9VE61.1 RecName: Full=E3 ubiquitin-protein ligase RNF181 homolog; AltName: Full=RING finger protein 181 homolog && PF13639:Ring finger domain	-
FBgn0011336	2295.79	2537.62	1390.82	2027.21	2416.71	1709.01	0.499859	0.0702492	0.485179	Stt3B	3R	25066712	25069637	-	2703	protein_coding	- && Q3TDQ1.2 RecName: Full=Dolichyl-diphosphooligosaccharide--protein glycosyltransferase subunit STT3B; Short=Oligosaccharyl transferase subunit STT3B; Short=STT3-B; AltName: Full=B6dom1 antigen; AltName: Full=Source of immunodominant MHC-associated peptides && PF02516:Oligosaccharyl transferase STT3 subunit	-
FBgn0037326	28.2656	22.9961	50.3587	61.9913	25.6309	56.175	-1.13049	0.0702965	0.485179	CG14669	3R	5414527	5458394	+	4885	protein_coding	- && Q5SSG5.1 RecName: Full=Ras-like protein family member 10B; Flags: Precursor && PF00071:Ras family	Ras
FBgn0015600	1152.61	1300.43	841.448	958.552	1226.52	900	0.446464	0.0704356	0.485772	toc	2L	3068345	3144786	-	11265	protein_coding	- && - && -	-
FBgn0031759	818.655	745.075	1240.66	948.375	781.865	1094.52	-0.485198	0.0707897	0.487846	lid	2L	5989400	5999501	-	7158	protein_coding	- && Q9VMJ7.1 RecName: Full=Lysine-specific demethylase lid; AltName: Full=Histone demethylase lid; AltName: Full=Jumonji/ARID domain-containing protein lid; AltName: Full=Protein little imaginal disks; AltName: Full=Retinoblastoma-binding protein 2 homolog && PF01388:ARID/BRIGHT DNA binding domain|PF08429:PLU-1-like protein|PF02375:jmjN domain|PF00628:PHD-finger|PF02928:C5HC2 zinc finger|PF02373…	JmjC
FBgn0004379	8.37499	9.19845	77.8271	3.70097	8.78672	40.764	-2.21464	0.0710154	0.488762	Klp67A	3L	9362636	9367046	-	3086	protein_coding	- && Q91WD7.1 RecName: Full=Kinesin-like protein KIF18A && PF00225:Kinesin motor domain	Kinesin
FBgn0031062	225.078	213.864	270.106	408.958	219.471	339.532	-0.629299	0.0710351	0.488762	CG14230	X	19704176	19706417	+	2053	protein_coding	- && Q9VWD4.2 RecName: Full=Probable RNA-binding protein CG14230 && PF00076:RNA recognition motif. (a.k.a. RRM, RBD, or RNP domain)	RRM_1
FBgn0020909	173.781	146.025	184.954	358.069	159.903	271.512	-0.763259	0.071083	0.488762	Rtc1	X	13757179	13758598	+	1301	protein_coding	- && P56175.3 RecName: Full=Probable RNA 3'-terminal phosphate cyclase-like protein && PF05189:RNA 3'-terminal phosphate cyclase (RTC), insert domain|PF01137:RNA 3'-terminal phosphate cyclase	-
FBgn0011224	117.25	106.932	297.574	120.282	112.091	208.928	-0.898208	0.0713052	0.489922	heph	3R	31846987	32015520	-	12120	protein_coding	- && Q29099.1 RecName: Full=Polypyrimidine tract-binding protein 1; Short=PTB; AltName: Full=Heterogeneous nuclear ribonucleoprotein I; Short=hnRNP I && PF14259:RNA recognition motif (a.k.a. RRM, RBD, or RNP domain)|PF13893:RNA recognition motif. (a.k.a. RRM, RBD, or RNP domain)	-
FBgn0260755	294.171	234.561	300.321	556.997	264.366	428.659	-0.696791	0.0714923	0.490358	CG42553	3L	834093	835515	+	1251	protein_coding	- && Q5BKL1.1 RecName: Full=UPF0415 protein C7orf25 homolog && PF07000:Protein of unknown function (DUF1308)	-
FBgn0003162	331.859	496.716	1142.68	375.649	414.288	759.167	-0.87414	0.0715268	0.490358	Pu	2R	21175315	21182608	+	2152	protein_coding	- && P48596.3 RecName: Full=GTP cyclohydrolase 1; AltName: Full=GTP cyclohydrolase I; Short=GTP-CH-I; AltName: Full=Protein punch && PF01227:GTP cyclohydrolase I	GTP_cyclohydroI
FBgn0031309	27.2187	42.5428	57.6836	88.8234	34.8808	73.2535	-1.07295	0.0715872	0.490358	Tfb4	2L	1149445	1150677	-	999	protein_coding	- && Q05B56.1 RecName: Full=General transcription factor IIH subunit 3; AltName: Full=General transcription factor IIH polypeptide 3 && PF03850:Transcription factor Tfb4	-
FBgn0020388	1487.61	1341.82	1302	3448.38	1414.72	2375.19	-0.747484	0.0716011	0.490358	Gcn5	3L	12521129	12524014	-	2770	protein_coding	- && Q92830.3 RecName: Full=Histone acetyltransferase KAT2A; AltName: Full=General control of amino acid synthesis protein 5-like 2; AltName: Full=Histone acetyltransferase GCN5; Short=HsGCN5; AltName: Full=Lysine acetyltransferase 2A; AltName: Full=STAF97 && PF06466:PCAF (P300/CBP-associated factor) N-terminal domain|PF00583:Acetyltransferase (GNAT) family|PF00439:Bromodomain	Bromodomain
FBgn0026402	45.0156	56.3405	98.8862	87.8981	50.678	93.3922	-0.883331	0.0716715	0.490358	NiPp1	2R	17003563	17005149	-	1349	protein_coding	- && Q8R3G1.1 RecName: Full=Nuclear inhibitor of protein phosphatase 1; Short=NIPP-1; AltName: Full=Protein phosphatase 1 regulatory inhibitor subunit 8 && PF00498:FHA domain	FHA
FBgn0040260	2794.1	3996.73	1446.67	2867.33	3395.42	2157	0.654518	0.0716904	0.490358	Ugt37D1	2L	16799025	16801584	+	1954	protein_coding	- && P54855.3 RecName: Full=UDP-glucuronosyltransferase 2B15; Short=UDPGT 2B15; AltName: Full=HLUG4; AltName: Full=UDP-glucuronosyltransferase 2B8; Short=UDPGT 2B8; AltName: Full=UDPGTh-3; Flags: Precursor && PF00201:UDP-glucoronosyl and UDP-glucosyl transferase	UDPGT
FBgn0037042	6.28124	4.59923	0	0	5.44023	0	5.00671	0.0717486	1	CG12984	3L	20991673	20992930	+	909	protein_coding	- && - && -	-
FBgn0033475	177.968	178.22	294.827	243.339	178.094	269.083	-0.595466	0.0717864	0.490648	CG12129	2R	10033304	10034698	+	1239	protein_coding	- && - && PF00013:KH domain|PF10469:AKAP7 2'5' RNA ligase-like domain	KH_1
FBgn0011817	74.328	57.4903	157.485	88.8234	65.9092	123.154	-0.900903	0.0719022	0.491072	nmo	3L	7979046	8054147	+	6945	protein_coding	- && E1BMN8.2 RecName: Full=Serine/threonine-protein kinase NLK; AltName: Full=Nemo-like kinase && PF00069:Protein kinase domain	Pkinase
FBgn0044028	31.4062	34.4942	13.7342	10.1777	32.9502	11.9559	1.46195	0.07215	0.492397	Notum	3L	16023480	16032752	+	3792	protein_coding	- && Q9VUX3.3 RecName: Full=Palmitoleoyl-protein carboxylesterase NOTUM; AltName: Full=Protein Notum; AltName: Full=Protein wingful; AltName: Full=dNOTUM; Flags: Precursor && PF03283:Pectinacetylesterase	-
FBgn0037369	367.453	595.6	330.536	297.928	481.526	314.232	0.615109	0.0723388	0.492837	CG2100	3R	5734698	5736355	-	1597	protein_coding	- && Q96Q11.2 RecName: Full=CCA tRNA nucleotidyltransferase 1, mitochondrial; AltName: Full=Mitochondrial tRNA nucleotidyl transferase, CCA-adding; AltName: Full=mt CCA-adding enzyme; AltName: Full=mt tRNA CCA-diphosphorylase; AltName: Full=mt tRNA CCA-pyrophosphorylase; AltName: Full=mt tRNA adenylyltransferase; Flags: Precursor && PF01743:Poly A polymerase head domain|PF12627:Probable RNA and S…	-
FBgn0270927	236.593	329.994	187.701	180.423	283.294	184.062	0.621338	0.0723704	0.492837	betaGlu	3R	31769293	31771848	-	2331	protein_coding	- && P12265.2 RecName: Full=Beta-glucuronidase; Flags: Precursor && PF00703:Glycosyl hydrolases family 2|PF02836:Glycosyl hydrolases family 2, TIM barrel domain|PF02837:Glycosyl hydrolases family 2, sugar binding domain	-
FBgn0004910	305.687	150.625	144.667	116.581	228.156	130.624	0.805699	0.0723761	0.492837	Eip63F-1	3L	3909973	3935617	-	3545	protein_coding	- && P48593.2 RecName: Full=Calcium-binding protein E63-1 && PF13499:EF-hand domain pair	-
FBgn0031042	33.4999	24.1459	9.15613	10.1777	28.8229	9.6669	1.5774	0.0724833	0.493199	CG14221	X	19618819	19621245	-	2068	protein_coding	- && Q39592.1 RecName: Full=Dynein 16 kDa light chain, flagellar outer arm && PF00085:Thioredoxin|PF15928:Domain of unknown function (DUF4746)	-
FBgn0050323	14.6562	6.89884	1.83123	0.925244	10.7775	1.37823	2.96848	0.0727058	1	CG30323	2R	17853295	17854296	+	1002	protein_coding	- && - && PF00089:Trypsin	Trypsin
FBgn0053107	69.0936	54.0409	89.7301	136.011	61.5673	112.87	-0.873077	0.0729517	0.496017	CG33107	3R	22583352	22584718	-	1067	protein_coding	- && - && -	-
FBgn0000473	1088.75	597.899	592.402	499.632	843.324	546.017	0.627559	0.0730395	0.496245	Cyp6a2	2R	6779749	6781491	-	1674	protein_coding	- && P33270.2 RecName: Full=Cytochrome P450 6a2; AltName: Full=CYPVIA2; AltName: Full=Cytochrome P450-B1 && PF00067:Cytochrome P450	p450
FBgn0035113	83.7499	65.539	32.9621	42.5612	74.6444	37.7616	0.984133	0.0732014	0.496976	pyx	3L	217932	223069	-	4046	protein_coding	- && Q9W0T5.2 RecName: Full=Transient receptor potential channel pyrexia && PF12796:Ankyrin repeats (3 copies)|PF00520:Ion transport protein|PF13857:Ankyrin repeats (many copies)	Ion_trans
FBgn0003016	328.718	285.152	564.018	367.322	306.935	465.67	-0.60112	0.0733806	0.497263	osp	2L	14599196	14689340	-	6846	protein_coding	- && Q27421.5 RecName: Full=Protein outspread && PF00169:PH domain	PH
FBgn0036886	329.765	290.901	350.68	625.465	310.333	488.072	-0.652983	0.0733879	0.497263	CG9300	3L	19552420	19554767	+	2156	protein_coding	- && - && PF08168:NUC205 domain	-
FBgn0026189	396.765	443.825	562.186	611.586	420.295	586.886	-0.481944	0.0734069	0.497263	prominin-like	3L	3114450	3127724	-	5597	protein_coding	- && P82295.1 RecName: Full=Prominin-like protein && PF05478:Prominin	Prominin
FBgn0259935	38.7343	43.6926	20.1435	12.9534	41.2135	16.5484	1.31564	0.073513	0.497263	CG42458	3L	7423827	7454717	+	3731	protein_coding	- && P19600.1 RecName: Full=Heterogeneous nuclear ribonucleoprotein C; Short=hnRNP C; AltName: Full=hnRNP core protein C && PF00076:RNA recognition motif. (a.k.a. RRM, RBD, or RNP domain)	RRM_1
FBgn0266111	31.4062	39.0934	107.127	47.1874	35.2498	77.1571	-1.13152	0.0735155	0.497263	ana3	2R	12344983	12351325	+	6284	protein_coding	- && - && PF14726:Rotatin, an armadillo repeat protein, centriole functioning	-
FBgn0038979	0	0	2.74684	9.25244	0	5.99964	-4.89355	0.0735485	1	tHMG2	3R	22492953	22493746	+	654	protein_coding	- && Q05783.1 RecName: Full=High mobility group protein D; Short=HMG-D && PF00505:HMG (high mobility group) box	HMG_box
FBgn0041171	791.436	834.76	1150.93	1043.67	813.098	1097.3	-0.432554	0.0737136	0.497622	ago	3L	4246343	4254306	-	5517	protein_coding	- && Q9VZF4.1 RecName: Full=F-box/WD repeat-containing protein 7; AltName: Full=F-box and WD-40 domain-containing protein 7; AltName: Full=Protein archipelago && PF00400:WD domain, G-beta repeat|PF12937:F-box-like	WD40
FBgn0085453	3526.92	5199.43	3253.17	2967.26	4363.17	3110.21	0.488268	0.0737407	0.497622	Mthfs	2R	23359215	23360266	+	915	protein_coding	- && Q8L539.1 RecName: Full=5-formyltetrahydrofolate cyclo-ligase, mitochondrial; Short=5-FCL; Flags: Precursor && PF01812:5-formyltetrahydrofolate cyclo-ligase family	-
FBgn0032299	88.9842	50.5915	41.2026	21.2806	69.7879	31.2416	1.16066	0.0738361	0.497622	CG17127	2L	10770868	10771370	+	469	protein_coding	- && - && -	-
FBgn0002641	282.656	378.286	404.701	602.334	330.471	503.517	-0.608046	0.0738395	0.497622	mal	X	20429675	20433210	+	3209	protein_coding	- && Q9VRA2.1 RecName: Full=Molybdenum cofactor sulfurase; Short=MCS; Short=MOS; Short=MoCo sulfurase; AltName: Full=Molybdenum cofactor sulfurtransferase; AltName: Full=Protein maroon-like; Short=Ma-l && PF03473:MOSC domain|PF00266:Aminotransferase class-V|PF03476:MOSC N-terminal beta barrel domain	MOSC_N
FBgn0052062	259.625	319.646	553.03	343.265	289.635	448.148	-0.630237	0.0738407	0.497622	Rbfox1	3L	10481412	10594012	+	8305	protein_coding	- && Q642J5.1 RecName: Full=RNA binding protein fox-1 homolog 1; AltName: Full=Ataxin-2-binding protein 1; AltName: Full=Fox-1 homolog A && PF00076:RNA recognition motif. (a.k.a. RRM, RBD, or RNP domain)	RRM_1
FBgn0032256	70.1405	71.288	96.1394	157.291	70.7143	126.715	-0.841467	0.0739024	0.497671	RluA-2	2L	10477073	10482975	+	2013	protein_coding	- && Q8IZ73.2 RecName: Full=RNA pseudouridylate synthase domain-containing protein 2 && PF00849:RNA pseudouridylate synthase	-
FBgn0037555	428.171	331.144	473.372	651.372	379.658	562.372	-0.566273	0.073969	0.497753	Ada2b	3R	8236632	8240515	-	2636	protein_coding	- && Q8I8V0.1 RecName: Full=Transcriptional adapter 2B; AltName: Full=dADA2b && PF00249:Myb-like DNA-binding domain|PF00569:Zinc finger, ZZ type	Myb_DNA-binding
FBgn0022709	1115.97	1195.8	887.229	833.645	1155.88	860.437	0.425763	0.0742099	0.49881	Adk1	3L	12200322	12204082	-	1266	protein_coding	- && P12115.2 RecName: Full=Adenylate kinase isoenzyme 1; Short=AK 1; AltName: Full=ATP-AMP transphosphorylase 1; AltName: Full=ATP:AMP phosphotransferase; AltName: Full=Adenylate monophosphate kinase; AltName: Full=Myokinase && PF00406:Adenylate kinase	ADK
FBgn0260866	1145.28	1147.51	1474.14	1571.99	1146.39	1523.06	-0.40987	0.0742352	0.49881	dnr1	2R	22563152	22592964	-	3553	protein_coding	- && Q6TEM9.2 RecName: Full=E3 ubiquitin-protein ligase MYLIP-A; AltName: Full=Myosin regulatory light chain-interacting protein A; Short=MIR-A && PF00373:FERM central domain|PF09379:FERM N-terminal domain|PF13920:Zinc finger, C3HC4 type (RING finger)	Band_41
FBgn0030929	1.04687	0	12.8186	4.62622	0.523437	8.7224	-4.00281	0.0743381	1	CG15043	X	18493193	18494168	-	903	protein_coding	- && - && PF15868:Transcription activator MBF2	-
FBgn0031351	10.4687	12.6479	39.3714	25.9068	11.5583	32.6391	-1.49944	0.0743563	0.499257	CG14352	2L	1611410	1612576	+	1030	protein_coding	- && - && PF13873:Myb/SANT-like DNA-binding domain	-
FBgn0261244	385.249	462.222	342.439	192.451	423.736	267.445	0.663573	0.0746001	0.500455	inaE	X	13783714	13811493	+	7128	protein_coding	- && Q9Y4D2.3 RecName: Full=Sn1-specific diacylglycerol lipase alpha; Short=DGL-alpha; AltName: Full=Neural stem cell-derived dendrite regulator && PF01764:Lipase (class 3)	Lipase_3
FBgn0051320	74.328	44.8425	113.536	105.478	59.5852	109.507	-0.875473	0.0746442	0.500455	HEATR2	3R	14358356	14361786	-	3431	protein_coding	- && Q8INF7.1 RecName: Full=Dynein assembly factor 5, axonemal; AltName: Full=HEAT repeat-containing protein 2 homolog && -	-
FBgn0037802	19.8906	10.3483	41.2026	37.935	15.1194	39.5688	-1.38308	0.0747244	0.500626	Sirt6	3R	10255349	10261849	-	1114	protein_coding	- && Q9VH08.1 RecName: Full=NAD-dependent protein deacetylase Sirt6; AltName: Full=Regulatory protein SIR2 homolog 6; AltName: Full=SIR2-like protein 6 && PF02146:Sir2 family	SIR2
FBgn0028507	366.406	343.792	214.253	269.246	355.099	241.75	0.55492	0.0750075	0.500998	CG3793	2L	15764220	15766267	+	1738	protein_coding	- && Q3T0H0.1 RecName: Full=Leucine carboxyl methyltransferase 1; AltName: Full=[Phosphatase 2A protein]-leucine-carboxy methyltransferase 1 && PF04072:Leucine carboxyl methyltransferase	-
FBgn0085271	58.6249	37.9436	22.8903	18.5049	48.2843	20.6976	1.22346	0.0750948	0.500998	CG34242	3L	12533996	12534403	+	375	protein_coding	- && - && -	-
FBgn0030847	231.359	215.014	380.895	286.826	223.186	333.86	-0.580821	0.0750998	0.500998	CG12991	X	17579861	17599314	+	2872	protein_coding	- && - && -	-
FBgn0037727	1529.48	1545.34	1012.67	1253.71	1537.41	1133.19	0.440131	0.0751056	0.500998	Nepl12	3R	9675523	9677778	+	2197	protein_coding	- && O44857.2 RecName: Full=Neprilysin-2 && PF05649:Peptidase family M13|PF01431:Peptidase family M13	-
FBgn0001233	47957.3	50737.5	25504.4	42945.2	49347.4	34224.8	0.527932	0.075118	0.500998	Hsp83	3L	3192969	3197059	+	2960	protein_coding	- && P02828.1 RecName: Full=Heat shock protein 83; AltName: Full=HSP 82 && PF00183:Hsp90 protein|PF02518:Histidine kinase-, DNA gyrase B-, and HSP90-like ATPase	HATPase_c
FBgn0028988	1234.26	1299.28	1030.06	819.766	1266.77	924.915	0.453689	0.0751566	0.500998	Spn42Dd	2R	6883280	6884873	+	1195	protein_coding	- && Q7YTY6.1 RecName: Full=Serine protease inhibitor 42Dd; Short=Serpin 42Dd; Flags: Precursor && PF00079:Serpin (serine protease inhibitor)	Serpin
FBgn0014388	217.75	148.325	555.777	160.992	183.037	358.385	-0.968914	0.0751634	0.500998	sty	3L	3401153	3424935	-	5438	protein_coding	- && O44783.2 RecName: Full=Protein sprouty; Short=Spry && PF05210:Sprouty protein (Spry)	-
FBgn0031776	118.297	135.677	195.941	198.927	126.987	197.434	-0.637317	0.0752481	0.501197	Pfdn1	2L	6069079	6069838	+	595	protein_coding	- && Q4SPU8.1 RecName: Full=Prefoldin subunit 1 && PF01920:Prefoldin subunit	-
FBgn0001977	299.406	356.44	358.005	692.082	327.923	525.043	-0.679298	0.0753548	0.501542	CIAPIN1	2L	15036293	15038861	-	2358	protein_coding	- && Q9V3Y2.1 RecName: Full=Anamorsin homolog; AltName: Full=Fe-S cluster assembly protein DRE2 homolog && PF03022:Major royal jelly protein|PF05093:Cytokine-induced anti-apoptosis inhibitor 1, Fe-S biogenesis	-
FBgn0039809	505.64	403.582	345.186	276.648	454.611	310.917	0.548452	0.0755789	0.502274	CG15547	3R	30881792	30883503	-	1601	protein_coding	- && - && PF00334:Nucleoside diphosphate kinase	NDK
FBgn0033051	42.9218	43.6926	90.6457	73.0942	43.3072	81.87	-0.918914	0.0755949	0.502274	Strica	2R	6020311	6023144	-	2720	protein_coding	- && P97864.2 RecName: Full=Caspase-7; Short=CASP-7; AltName: Full=Apoptotic protease Mch-3; AltName: Full=Cysteine protease LICE2; Contains: RecName: Full=Caspase-7 subunit p20; Contains: RecName: Full=Caspase-7 subunit p11; Flags: Precursor && PF00656:Caspase domain	Peptidase_C14
FBgn0015360	792.483	922.145	411.11	718.914	857.314	565.012	0.601482	0.075649	0.502274	oxt	3L	2258839	2262664	-	3380	protein_coding	- && Q7KVA1.1 RecName: Full=Xylosyltransferase oxt; AltName: Full=Imaginal disk type I; AltName: Full=Peptide O-xylosyltransferase && PF12529:Xylosyltransferase C terminal|PF02485:Core-2/I-Branching enzyme|PF01822:WSC domain	-
FBgn0087007	773.639	831.31	1216.85	985.384	802.475	1101.12	-0.456565	0.0756844	0.502274	bbg	3L	14412828	14536276	-	10028	protein_coding	- && O15018.4 RecName: Full=PDZ domain-containing protein 2; AltName: Full=Activated in prostate cancer protein; AltName: Full=PDZ domain-containing protein 3; Contains: RecName: Full=Processed PDZ domain-containing protein 2 && PF00595:PDZ domain (Also known as DHR or GLGF)	PDZ
FBgn0051100	71.1874	96.5838	33.8777	51.8136	83.8856	42.8457	0.968536	0.0757508	0.50235	CG31100	3R	8995229	9003650	-	2688	protein_coding	- && A9ZSY2.1 RecName: Full=Facilitated trehalose transporter Tret1; Short=AmTRET1 && PF00083:Sugar (and other) transporter	Sugar_tr
[truncated: 10,500 more rows]
